# Supplementary material for: Probing the exchange of CO 2 and O 2 in the shallow critical zone during weathering of marl and black shale
Source: Copernicus journal article supplement (doi:10.5194/esurf-12-271-2024), 2024-01-31
Supplement: Supplementary file 1 [file esurf-12-271-2024-supplement.zip]

Archive with 2 entries (2 files):
- esurf-12-271-2024-supplement-title-page.pdf
- Roylands-et-al_2023_ESurf_Data.xlsx
