# Supplementary material for: Probing the exchange of CO 2 and O 2 in the shallow critical zone during weathering of marl and black shale
Source: Copernicus journal article supplement (doi:10.5194/esurf-12-271-2024), 2024-01-31
Supplement: Supplementary file 1 [file esurf-12-271-2024-supplement.zip › esurf-12-271-2024-supplement-title-page.pdf]

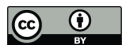

*Supplement of*

**Probing the exchange of CO<sub>2</sub> and O<sub>2</sub> in the shallow critical zone during weathering of marl and black shale**

**Tobias Roylands et al.**

*Correspondence to:* Robert G. Hilton ([robert.hilton@earth.ox.ac.uk](mailto:robert.hilton@earth.ox.ac.uk))

- [esurf-12-271-2024-supplement-title-page.pdf](#)
- [Roylands-et-al\\_2023\\_ESurf\\_Data.xlsx](#)

The copyright of individual parts of the supplement might differ from the article licence.
