# Supplementary material for: Probing the exchange of CO 2 and O 2 in the shallow critical zone during weathering of marl and black shale
Source: Copernicus journal article supplement (doi:10.5194/esurf-12-271-2024), 2024-01-31
Supplement: Supplementary file 1 [file Roylands-et-al_2023_ESurf_Data.xlsx]

## Sheet: Info
This file contains supplementary data (Table S1 to Table S8) for the article "Probing the exchange of CO2 and O2 in the shallow critical zone during weathering of marl and black shale" by Roylands et al., 2023.

## Sheet: Table S1
Table S1. Climate data based on hourly resolution: i) temperatures for air, chamber interior and rock surface, ii) and relative air humidity for the chamber interior.
Date and time	Moulin Air - Temperature (°C)	Moulin Air - Temperature (°C) - Daily averages	Brusquet Air - Temperature (°C)	Brusquet Air - Temperature (°C) - Daily averages	Moulin Chamber Interior - Temperature (°C) - measured	Moulin Chamber Interior - Temperature (°C) - estimated	Moulin Chamber Interior - Temperature (°C) - compilation	Moulin Chamber Interior - Temperature (°C) RMSE	Moulin Chamber Interior - Temperature (°C) - compilation - Daily average	Moulin Chamber Interior - Temperature (°C) RMSE - Daily average	Brusquet Chamber Interior - Temperature (°C) - measured	Brusquet Chamber Interior - Temperature (°C) - estimated	Brusquet Chamber Interior - Temperature (°C) - compilation	Brusquet Chamber Interior - Temperature (°C) RMSE	Brusquet Chamber Interior - Temperature (°C) - compilation - Daily average	Brusquet Chamber Interior - Temperature (°C) RMSE - Daily average	Moulin Rock surface - Temperature (°C)	Moulin Rock surface - Temperature (°C) - Daily averages	Brusquet Rock surface - Temperature (°C)	Brusquet Rock surface - Temperature (°C) - Daily averages	Moulin Chamber Interior - Relative humidity (%)	Moulin Chamber Interior - Relative humidity (%) - Daily averages	Brusquet Chamber Interior - Relative humidity (%)	Brusquet Chamber Interior - Relative humidity (%) - Daily averages
2018-01-01	2.2	2.9	3.9	2.2	#N/A	#N/A	#N/A	#N/A	#N/A	#N/A	#N/A	#N/A	#N/A	#N/A	#N/A	#N/A	#N/A	#N/A	#N/A	#N/A	#N/A	#N/A	#N/A	#N/A
2018-01-01 01:00:00	2.7	2.9	3.4	2.2	#N/A	#N/A	#N/A	#N/A	#N/A	#N/A	#N/A	#N/A	#N/A	#N/A	#N/A	#N/A	#N/A	#N/A	#N/A	#N/A	#N/A	#N/A	#N/A	#N/A
2018-01-01 02:00:00	2.3	2.9	3.3	2.2	#N/A	#N/A	#N/A	#N/A	#N/A	#N/A	#N/A	#N/A	#N/A	#N/A	#N/A	#N/A	#N/A	#N/A	#N/A	#N/A	#N/A	#N/A	#N/A	#N/A
2018-01-01 03:00:00	3.2	2.9	2.4	2.2	#N/A	#N/A	#N/A	#N/A	#N/A	#N/A	#N/A	#N/A	#N/A	#N/A	#N/A	#N/A	#N/A	#N/A	#N/A	#N/A	#N/A	#N/A	#N/A	#N/A
2018-01-01 04:00:00	2.5	2.9	1.5	2.2	#N/A	#N/A	#N/A	#N/A	#N/A	#N/A	#N/A	#N/A	#N/A	#N/A	#N/A	#N/A	#N/A	#N/A	#N/A	#N/A	#N/A	#N/A	#N/A	#N/A
2018-01-01 05:00:00	1.8	2.9	1	2.2	#N/A	#N/A	#N/A	#N/A	#N/A	#N/A	#N/A	#N/A	#N/A	#N/A	#N/A	#N/A	#N/A	#N/A	#N/A	#N/A	#N/A	#N/A	#N/A	#N/A
2018-01-01 06:00:00	1.3	2.9	0.4	2.2	#N/A	#N/A	#N/A	#N/A	#N/A	#N/A	#N/A	#N/A	#N/A	#N/A	#N/A	#N/A	#N/A	#N/A	#N/A	#N/A	#N/A	#N/A	#N/A	#N/A
2018-01-01 07:00:00	-0.6	2.9	-0.5	2.2	#N/A	#N/A	#N/A	#N/A	#N/A	#N/A	#N/A	#N/A	#N/A	#N/A	#N/A	#N/A	#N/A	#N/A	#N/A	#N/A	#N/A	#N/A	#N/A	#N/A
2018-01-01 08:00:00	-0.7	2.9	-0.5	2.2	#N/A	#N/A	#N/A	#N/A	#N/A	#N/A	#N/A	#N/A	#N/A	#N/A	#N/A	#N/A	#N/A	#N/A	#N/A	#N/A	#N/A	#N/A	#N/A	#N/A
2018-01-01 09:00:00	0.1	2.9	-0.8	2.2	#N/A	#N/A	#N/A	#N/A	#N/A	#N/A	#N/A	#N/A	#N/A	#N/A	#N/A	#N/A	#N/A	#N/A	#N/A	#N/A	#N/A	#N/A	#N/A	#N/A
2018-01-01 10:00:00	4.1	2.9	0.2	2.2	#N/A	#N/A	#N/A	#N/A	#N/A	#N/A	#N/A	#N/A	#N/A	#N/A	#N/A	#N/A	#N/A	#N/A	#N/A	#N/A	#N/A	#N/A	#N/A	#N/A
2018-01-01 11:00:00	5	2.9	3.6	2.2	#N/A	#N/A	#N/A	#N/A	#N/A	#N/A	#N/A	#N/A	#N/A	#N/A	#N/A	#N/A	#N/A	#N/A	#N/A	#N/A	#N/A	#N/A	#N/A	#N/A
2018-01-01 12:00:00	6.4	2.9	5.1	2.2	#N/A	#N/A	#N/A	#N/A	#N/A	#N/A	#N/A	#N/A	#N/A	#N/A	#N/A	#N/A	#N/A	#N/A	#N/A	#N/A	#N/A	#N/A	#N/A	#N/A
2018-01-01 13:00:00	8.2	2.9	7.3	2.2	#N/A	#N/A	#N/A	#N/A	#N/A	#N/A	#N/A	#N/A	#N/A	#N/A	#N/A	#N/A	#N/A	#N/A	#N/A	#N/A	#N/A	#N/A	#N/A	#N/A
2018-01-01 14:00:00	8.1	2.9	8.2	2.2	#N/A	#N/A	#N/A	#N/A	#N/A	#N/A	#N/A	#N/A	#N/A	#N/A	#N/A	#N/A	#N/A	#N/A	#N/A	#N/A	#N/A	#N/A	#N/A	#N/A
2018-01-01 15:00:00	5.4	2.9	6.7	2.2	#N/A	#N/A	#N/A	#N/A	#N/A	#N/A	#N/A	#N/A	#N/A	#N/A	#N/A	#N/A	#N/A	#N/A	#N/A	#N/A	#N/A	#N/A	#N/A	#N/A
2018-01-01 16:00:00	5.2	2.9	3.7	2.2	#N/A	#N/A	#N/A	#N/A	#N/A	#N/A	#N/A	#N/A	#N/A	#N/A	#N/A	#N/A	#N/A	#N/A	#N/A	#N/A	#N/A	#N/A	#N/A	#N/A
2018-01-01 17:00:00	2.5	2.9	1.5	2.2	#N/A	#N/A	#N/A	#N/A	#N/A	#N/A	#N/A	#N/A	#N/A	#N/A	#N/A	#N/A	#N/A	#N/A	#N/A	#N/A	#N/A	#N/A	#N/A	#N/A
2018-01-01 18:00:00	0.7	2.9	0.2	2.2	#N/A	#N/A	#N/A	#N/A	#N/A	#N/A	#N/A	#N/A	#N/A	#N/A	#N/A	#N/A	#N/A	#N/A	#N/A	#N/A	#N/A	#N/A	#N/A	#N/A
2018-01-01 19:00:00	2.5	2.9	0.3	2.2	#N/A	#N/A	#N/A	#N/A	#N/A	#N/A	#N/A	#N/A	#N/A	#N/A	#N/A	#N/A	#N/A	#N/A	#N/A	#N/A	#N/A	#N/A	#N/A	#N/A
2018-01-01 20:00:00	2.5	2.9	0.7	2.2	#N/A	#N/A	#N/A	#N/A	#N/A	#N/A	#N/A	#N/A	#N/A	#N/A	#N/A	#N/A	#N/A	#N/A	#N/A	#N/A	#N/A	#N/A	#N/A	#N/A
2018-01-01 21:00:00	2.3	2.9	0.5	2.2	#N/A	#N/A	#N/A	#N/A	#N/A	#N/A	#N/A	#N/A	#N/A	#N/A	#N/A	#N/A	#N/A	#N/A	#N/A	#N/A	#N/A	#N/A	#N/A	#N/A
2018-01-01 22:00:00	1.7	2.9	0.3	2.2	#N/A	#N/A	#N/A	#N/A	#N/A	#N/A	#N/A	#N/A	#N/A	#N/A	#N/A	#N/A	#N/A	#N/A	#N/A	#N/A	#N/A	#N/A	#N/A	#N/A
2018-01-01 23:00:00	1.1	2.9	0.2	2.2	#N/A	#N/A	#N/A	#N/A	#N/A	#N/A	#N/A	#N/A	#N/A	#N/A	#N/A	#N/A	#N/A	#N/A	#N/A	#N/A	#N/A	#N/A	#N/A	#N/A
2018-01-02	0.4	1.4	0	0.4	#N/A	#N/A	#N/A	#N/A	#N/A	#N/A	#N/A	#N/A	#N/A	#N/A	#N/A	#N/A	#N/A	#N/A	#N/A	#N/A	#N/A	#N/A	#N/A	#N/A
2018-01-02 01:00:00	-0.4	1.4	-0.4	0.4	#N/A	#N/A	#N/A	#N/A	#N/A	#N/A	#N/A	#N/A	#N/A	#N/A	#N/A	#N/A	#N/A	#N/A	#N/A	#N/A	#N/A	#N/A	#N/A	#N/A
2018-01-02 02:00:00	-0.2	1.4	-0.8	0.4	#N/A	#N/A	#N/A	#N/A	#N/A	#N/A	#N/A	#N/A	#N/A	#N/A	#N/A	#N/A	#N/A	#N/A	#N/A	#N/A	#N/A	#N/A	#N/A	#N/A
2018-01-02 03:00:00	-0.5	1.4	-1.2	0.4	#N/A	#N/A	#N/A	#N/A	#N/A	#N/A	#N/A	#N/A	#N/A	#N/A	#N/A	#N/A	#N/A	#N/A	#N/A	#N/A	#N/A	#N/A	#N/A	#N/A
2018-01-02 04:00:00	-0.8	1.4	-1.2	0.4	#N/A	#N/A	#N/A	#N/A	#N/A	#N/A	#N/A	#N/A	#N/A	#N/A	#N/A	#N/A	#N/A	#N/A	#N/A	#N/A	#N/A	#N/A	#N/A	#N/A
2018-01-02 05:00:00	-0.7	1.4	-1.1	0.4	#N/A	#N/A	#N/A	#N/A	#N/A	#N/A	#N/A	#N/A	#N/A	#N/A	#N/A	#N/A	#N/A	#N/A	#N/A	#N/A	#N/A	#N/A	#N/A	#N/A
2018-01-02 06:00:00	-1.4	1.4	-1.6	0.4	#N/A	#N/A	#N/A	#N/A	#N/A	#N/A	#N/A	#N/A	#N/A	#N/A	#N/A	#N/A	#N/A	#N/A	#N/A	#N/A	#N/A	#N/A	#N/A	#N/A
2018-01-02 07:00:00	-2.3	1.4	-2.5	0.4	#N/A	#N/A	#N/A	#N/A	#N/A	#N/A	#N/A	#N/A	#N/A	#N/A	#N/A	#N/A	#N/A	#N/A	#N/A	#N/A	#N/A	#N/A	#N/A	#N/A
2018-01-02 08:00:00	-2.4	1.4	-3.3	0.4	#N/A	#N/A	#N/A	#N/A	#N/A	#N/A	#N/A	#N/A	#N/A	#N/A	#N/A	#N/A	#N/A	#N/A	#N/A	#N/A	#N/A	#N/A	#N/A	#N/A
2018-01-02 09:00:00	0.5	1.4	-2.8	0.4	#N/A	#N/A	#N/A	#N/A	#N/A	#N/A	#N/A	#N/A	#N/A	#N/A	#N/A	#N/A	#N/A	#N/A	#N/A	#N/A	#N/A	#N/A	#N/A	#N/A
2018-01-02 10:00:00	3.7	1.4	-2.5	0.4	#N/A	#N/A	#N/A	#N/A	#N/A	#N/A	#N/A	#N/A	#N/A	#N/A	#N/A	#N/A	#N/A	#N/A	#N/A	#N/A	#N/A	#N/A	#N/A	#N/A
2018-01-02 11:00:00	5.3	1.4	2	0.4	#N/A	#N/A	#N/A	#N/A	#N/A	#N/A	#N/A	#N/A	#N/A	#N/A	#N/A	#N/A	#N/A	#N/A	#N/A	#N/A	#N/A	#N/A	#N/A	#N/A
2018-01-02 12:00:00	5.6	1.4	5	0.4	#N/A	#N/A	#N/A	#N/A	#N/A	#N/A	#N/A	#N/A	#N/A	#N/A	#N/A	#N/A	#N/A	#N/A	#N/A	#N/A	#N/A	#N/A	#N/A	#N/A
2018-01-02 13:00:00	7	1.4	6.2	0.4	#N/A	#N/A	#N/A	#N/A	#N/A	#N/A	#N/A	#N/A	#N/A	#N/A	#N/A	#N/A	#N/A	#N/A	#N/A	#N/A	#N/A	#N/A	#N/A	#N/A
2018-01-02 14:00:00	7.3	1.4	6.6	0.4	#N/A	#N/A	#N/A	#N/A	#N/A	#N/A	#N/A	#N/A	#N/A	#N/A	#N/A	#N/A	#N/A	#N/A	#N/A	#N/A	#N/A	#N/A	#N/A	#N/A
2018-01-02 15:00:00	6	1.4	4.4	0.4	#N/A	#N/A	#N/A	#N/A	#N/A	#N/A	#N/A	#N/A	#N/A	#N/A	#N/A	#N/A	#N/A	#N/A	#N/A	#N/A	#N/A	#N/A	#N/A	#N/A
2018-01-02 16:00:00	3	1.4	1.5	0.4	#N/A	#N/A	#N/A	#N/A	#N/A	#N/A	#N/A	#N/A	#N/A	#N/A	#N/A	#N/A	#N/A	#N/A	#N/A	#N/A	#N/A	#N/A	#N/A	#N/A
2018-01-02 17:00:00	1.1	1.4	0.1	0.4	#N/A	#N/A	#N/A	#N/A	#N/A	#N/A	#N/A	#N/A	#N/A	#N/A	#N/A	#N/A	#N/A	#N/A	#N/A	#N/A	#N/A	#N/A	#N/A	#N/A
2018-01-02 18:00:00	2.5	1.4	-0.7	0.4	#N/A	#N/A	#N/A	#N/A	#N/A	#N/A	#N/A	#N/A	#N/A	#N/A	#N/A	#N/A	#N/A	#N/A	#N/A	#N/A	#N/A	#N/A	#N/A	#N/A
2018-01-02 19:00:00	1.3	1.4	-0.5	0.4	#N/A	#N/A	#N/A	#N/A	#N/A	#N/A	#N/A	#N/A	#N/A	#N/A	#N/A	#N/A	#N/A	#N/A	#N/A	#N/A	#N/A	#N/A	#N/A	#N/A
2018-01-02 20:00:00	0.3	1.4	0.3	0.4	#N/A	#N/A	#N/A	#N/A	#N/A	#N/A	#N/A	#N/A	#N/A	#N/A	#N/A	#N/A	#N/A	#N/A	#N/A	#N/A	#N/A	#N/A	#N/A	#N/A
2018-01-02 21:00:00	-0.2	1.4	0.9	0.4	#N/A	#N/A	#N/A	#N/A	#N/A	#N/A	#N/A	#N/A	#N/A	#N/A	#N/A	#N/A	#N/A	#N/A	#N/A	#N/A	#N/A	#N/A	#N/A	#N/A
2018-01-02 22:00:00	-0.3	1.4	0.7	0.4	#N/A	#N/A	#N/A	#N/A	#N/A	#N/A	#N/A	#N/A	#N/A	#N/A	#N/A	#N/A	#N/A	#N/A	#N/A	#N/A	#N/A	#N/A	#N/A	#N/A
2018-01-02 23:00:00	-1.4	1.4	0.3	0.4	#N/A	#N/A	#N/A	#N/A	#N/A	#N/A	#N/A	#N/A	#N/A	#N/A	#N/A	#N/A	#N/A	#N/A	#N/A	#N/A	#N/A	#N/A	#N/A	#N/A
2018-01-03	-1.6	3.8	0.5	3.9	#N/A	#N/A	#N/A	#N/A	#N/A	#N/A	#N/A	#N/A	#N/A	#N/A	#N/A	#N/A	#N/A	#N/A	#N/A	#N/A	#N/A	#N/A	#N/A	#N/A
2018-01-03 01:00:00	-1.4	3.8	1.4	3.9	#N/A	#N/A	#N/A	#N/A	#N/A	#N/A	#N/A	#N/A	#N/A	#N/A	#N/A	#N/A	#N/A	#N/A	#N/A	#N/A	#N/A	#N/A	#N/A	#N/A
2018-01-03 02:00:00	-1.3	3.8	2.2	3.9	#N/A	#N/A	#N/A	#N/A	#N/A	#N/A	#N/A	#N/A	#N/A	#N/A	#N/A	#N/A	#N/A	#N/A	#N/A	#N/A	#N/A	#N/A	#N/A	#N/A
2018-01-03 03:00:00	-1.5	3.8	2.4	3.9	#N/A	#N/A	#N/A	#N/A	#N/A	#N/A	#N/A	#N/A	#N/A	#N/A	#N/A	#N/A	#N/A	#N/A	#N/A	#N/A	#N/A	#N/A	#N/A	#N/A
2018-01-03 04:00:00	-1.3	3.8	2	3.9	#N/A	#N/A	#N/A	#N/A	#N/A	#N/A	#N/A	#N/A	#N/A	#N/A	#N/A	#N/A	#N/A	#N/A	#N/A	#N/A	#N/A	#N/A	#N/A	#N/A
2018-01-03 05:00:00	-1.1	3.8	2.1	3.9	#N/A	#N/A	#N/A	#N/A	#N/A	#N/A	#N/A	#N/A	#N/A	#N/A	#N/A	#N/A	#N/A	#N/A	#N/A	#N/A	#N/A	#N/A	#N/A	#N/A
2018-01-03 06:00:00	0.1	3.8	3.8	3.9	#N/A	#N/A	#N/A	#N/A	#N/A	#N/A	#N/A	#N/A	#N/A	#N/A	#N/A	#N/A	#N/A	#N/A	#N/A	#N/A	#N/A	#N/A	#N/A	#N/A
2018-01-03 07:00:00	1.4	3.8	3.7	3.9	#N/A	#N/A	#N/A	#N/A	#N/A	#N/A	#N/A	#N/A	#N/A	#N/A	#N/A	#N/A	#N/A	#N/A	#N/A	#N/A	#N/A	#N/A	#N/A	#N/A
2018-01-03 08:00:00	2.3	3.8	3.7	3.9	#N/A	#N/A	#N/A	#N/A	#N/A	#N/A	#N/A	#N/A	#N/A	#N/A	#N/A	#N/A	#N/A	#N/A	#N/A	#N/A	#N/A	#N/A	#N/A	#N/A
2018-01-03 09:00:00	2.9	3.8	4	3.9	#N/A	#N/A	#N/A	#N/A	#N/A	#N/A	#N/A	#N/A	#N/A	#N/A	#N/A	#N/A	#N/A	#N/A	#N/A	#N/A	#N/A	#N/A	#N/A	#N/A
2018-01-03 10:00:00	3.7	3.8	4.9	3.9	#N/A	#N/A	#N/A	#N/A	#N/A	#N/A	#N/A	#N/A	#N/A	#N/A	#N/A	#N/A	#N/A	#N/A	#N/A	#N/A	#N/A	#N/A	#N/A	#N/A
2018-01-03 11:00:00	5.3	3.8	5.8	3.9	#N/A	#N/A	#N/A	#N/A	#N/A	#N/A	#N/A	#N/A	#N/A	#N/A	#N/A	#N/A	#N/A	#N/A	#N/A	#N/A	#N/A	#N/A	#N/A	#N/A
2018-01-03 12:00:00	6.8	3.8	6.6	3.9	#N/A	#N/A	#N/A	#N/A	#N/A	#N/A	#N/A	#N/A	#N/A	#N/A	#N/A	#N/A	#N/A	#N/A	#N/A	#N/A	#N/A	#N/A	#N/A	#N/A
2018-01-03 13:00:00	8.9	3.8	6.7	3.9	#N/A	#N/A	#N/A	#N/A	#N/A	#N/A	#N/A	#N/A	#N/A	#N/A	#N/A	#N/A	#N/A	#N/A	#N/A	#N/A	#N/A	#N/A	#N/A	#N/A
2018-01-03 14:00:00	10.1	3.8	6.8	3.9	#N/A	#N/A	#N/A	#N/A	#N/A	#N/A	#N/A	#N/A	#N/A	#N/A	#N/A	#N/A	#N/A	#N/A	#N/A	#N/A	#N/A	#N/A	#N/A	#N/A
2018-01-03 15:00:00	10.6	3.8	6.9	3.9	#N/A	#N/A	#N/A	#N/A	#N/A	#N/A	#N/A	#N/A	#N/A	#N/A	#N/A	#N/A	#N/A	#N/A	#N/A	#N/A	#N/A	#N/A	#N/A	#N/A
2018-01-03 16:00:00	9	3.8	6.4	3.9	#N/A	#N/A	#N/A	#N/A	#N/A	#N/A	#N/A	#N/A	#N/A	#N/A	#N/A	#N/A	#N/A	#N/A	#N/A	#N/A	#N/A	#N/A	#N/A	#N/A
2018-01-03 17:00:00	7.4	3.8	4.6	3.9	#N/A	#N/A	#N/A	#N/A	#N/A	#N/A	#N/A	#N/A	#N/A	#N/A	#N/A	#N/A	#N/A	#N/A	#N/A	#N/A	#N/A	#N/A	#N/A	#N/A
2018-01-03 18:00:00	7.3	3.8	4	3.9	#N/A	#N/A	#N/A	#N/A	#N/A	#N/A	#N/A	#N/A	#N/A	#N/A	#N/A	#N/A	#N/A	#N/A	#N/A	#N/A	#N/A	#N/A	#N/A	#N/A
2018-01-03 19:00:00	6.5	3.8	3.8	3.9	#N/A	#N/A	#N/A	#N/A	#N/A	#N/A	#N/A	#N/A	#N/A	#N/A	#N/A	#N/A	#N/A	#N/A	#N/A	#N/A	#N/A	#N/A	#N/A	#N/A
2018-01-03 20:00:00	5.4	3.8	3.4	3.9	#N/A	#N/A	#N/A	#N/A	#N/A	#N/A	#N/A	#N/A	#N/A	#N/A	#N/A	#N/A	#N/A	#N/A	#N/A	#N/A	#N/A	#N/A	#N/A	#N/A
2018-01-03 21:00:00	4.2	3.8	2.8	3.9	#N/A	#N/A	#N/A	#N/A	#N/A	#N/A	#N/A	#N/A	#N/A	#N/A	#N/A	#N/A	#N/A	#N/A	#N/A	#N/A	#N/A	#N/A	#N/A	#N/A
2018-01-03 22:00:00	3.8	3.8	2.4	3.9	#N/A	#N/A	#N/A	#N/A	#N/A	#N/A	#N/A	#N/A	#N/A	#N/A	#N/A	#N/A	#N/A	#N/A	#N/A	#N/A	#N/A	#N/A	#N/A	#N/A
2018-01-03 23:00:00	3.7	3.8	2.2	3.9	#N/A	#N/A	#N/A	#N/A	#N/A	#N/A	#N/A	#N/A	#N/A	#N/A	#N/A	#N/A	#N/A	#N/A	#N/A	#N/A	#N/A	#N/A	#N/A	#N/A
2018-01-04	3.6	5.4	2.2	4.9	#N/A	#N/A	#N/A	#N/A	#N/A	#N/A	#N/A	#N/A	#N/A	#N/A	#N/A	#N/A	#N/A	#N/A	#N/A	#N/A	#N/A	#N/A	#N/A	#N/A
2018-01-04 01:00:00	3.2	5.4	2	4.9	#N/A	#N/A	#N/A	#N/A	#N/A	#N/A	#N/A	#N/A	#N/A	#N/A	#N/A	#N/A	#N/A	#N/A	#N/A	#N/A	#N/A	#N/A	#N/A	#N/A
2018-01-04 02:00:00	2.4	5.4	1.1	4.9	#N/A	#N/A	#N/A	#N/A	#N/A	#N/A	#N/A	#N/A	#N/A	#N/A	#N/A	#N/A	#N/A	#N/A	#N/A	#N/A	#N/A	#N/A	#N/A	#N/A
2018-01-04 03:00:00	1.5	5.4	0.2	4.9	#N/A	#N/A	#N/A	#N/A	#N/A	#N/A	#N/A	#N/A	#N/A	#N/A	#N/A	#N/A	#N/A	#N/A	#N/A	#N/A	#N/A	#N/A	#N/A	#N/A
2018-01-04 04:00:00	1.6	5.4	0.1	4.9	#N/A	#N/A	#N/A	#N/A	#N/A	#N/A	#N/A	#N/A	#N/A	#N/A	#N/A	#N/A	#N/A	#N/A	#N/A	#N/A	#N/A	#N/A	#N/A	#N/A
2018-01-04 05:00:00	2	5.4	0.5	4.9	#N/A	#N/A	#N/A	#N/A	#N/A	#N/A	#N/A	#N/A	#N/A	#N/A	#N/A	#N/A	#N/A	#N/A	#N/A	#N/A	#N/A	#N/A	#N/A	#N/A
2018-01-04 06:00:00	2.1	5.4	1.8	4.9	#N/A	#N/A	#N/A	#N/A	#N/A	#N/A	#N/A	#N/A	#N/A	#N/A	#N/A	#N/A	#N/A	#N/A	#N/A	#N/A	#N/A	#N/A	#N/A	#N/A
2018-01-04 07:00:00	2.5	5.4	3	4.9	#N/A	#N/A	#N/A	#N/A	#N/A	#N/A	#N/A	#N/A	#N/A	#N/A	#N/A	#N/A	#N/A	#N/A	#N/A	#N/A	#N/A	#N/A	#N/A	#N/A
2018-01-04 08:00:00	2.7	5.4	3.5	4.9	#N/A	#N/A	#N/A	#N/A	#N/A	#N/A	#N/A	#N/A	#N/A	#N/A	#N/A	#N/A	#N/A	#N/A	#N/A	#N/A	#N/A	#N/A	#N/A	#N/A
2018-01-04 09:00:00	3.5	5.4	4.8	4.9	#N/A	#N/A	#N/A	#N/A	#N/A	#N/A	#N/A	#N/A	#N/A	#N/A	#N/A	#N/A	#N/A	#N/A	#N/A	#N/A	#N/A	#N/A	#N/A	#N/A
2018-01-04 10:00:00	4.8	5.4	6	4.9	#N/A	#N/A	#N/A	#N/A	#N/A	#N/A	#N/A	#N/A	#N/A	#N/A	#N/A	#N/A	#N/A	#N/A	#N/A	#N/A	#N/A	#N/A	#N/A	#N/A
2018-01-04 11:00:00	6.4	5.4	6.9	4.9	#N/A	#N/A	#N/A	#N/A	#N/A	#N/A	#N/A	#N/A	#N/A	#N/A	#N/A	#N/A	#N/A	#N/A	#N/A	#N/A	#N/A	#N/A	#N/A	#N/A
2018-01-04 12:00:00	9.6	5.4	7.7	4.9	#N/A	#N/A	#N/A	#N/A	#N/A	#N/A	#N/A	#N/A	#N/A	#N/A	#N/A	#N/A	#N/A	#N/A	#N/A	#N/A	#N/A	#N/A	#N/A	#N/A
2018-01-04 13:00:00	12.8	5.4	9.1	4.9	#N/A	#N/A	#N/A	#N/A	#N/A	#N/A	#N/A	#N/A	#N/A	#N/A	#N/A	#N/A	#N/A	#N/A	#N/A	#N/A	#N/A	#N/A	#N/A	#N/A
2018-01-04 14:00:00	13.3	5.4	10.5	4.9	#N/A	#N/A	#N/A	#N/A	#N/A	#N/A	#N/A	#N/A	#N/A	#N/A	#N/A	#N/A	#N/A	#N/A	#N/A	#N/A	#N/A	#N/A	#N/A	#N/A
2018-01-04 15:00:00	12.9	5.4	10.4	4.9	#N/A	#N/A	#N/A	#N/A	#N/A	#N/A	#N/A	#N/A	#N/A	#N/A	#N/A	#N/A	#N/A	#N/A	#N/A	#N/A	#N/A	#N/A	#N/A	#N/A
2018-01-04 16:00:00	10.2	5.4	8.1	4.9	#N/A	#N/A	#N/A	#N/A	#N/A	#N/A	#N/A	#N/A	#N/A	#N/A	#N/A	#N/A	#N/A	#N/A	#N/A	#N/A	#N/A	#N/A	#N/A	#N/A
2018-01-04 17:00:00	5.1	5.4	6.4	4.9	#N/A	#N/A	#N/A	#N/A	#N/A	#N/A	#N/A	#N/A	#N/A	#N/A	#N/A	#N/A	#N/A	#N/A	#N/A	#N/A	#N/A	#N/A	#N/A	#N/A
2018-01-04 18:00:00	4.1	5.4	6	4.9	#N/A	#N/A	#N/A	#N/A	#N/A	#N/A	#N/A	#N/A	#N/A	#N/A	#N/A	#N/A	#N/A	#N/A	#N/A	#N/A	#N/A	#N/A	#N/A	#N/A
2018-01-04 19:00:00	3.2	5.4	5.6	4.9	#N/A	#N/A	#N/A	#N/A	#N/A	#N/A	#N/A	#N/A	#N/A	#N/A	#N/A	#N/A	#N/A	#N/A	#N/A	#N/A	#N/A	#N/A	#N/A	#N/A
2018-01-04 20:00:00	3	5.4	5.4	4.9	#N/A	#N/A	#N/A	#N/A	#N/A	#N/A	#N/A	#N/A	#N/A	#N/A	#N/A	#N/A	#N/A	#N/A	#N/A	#N/A	#N/A	#N/A	#N/A	#N/A
2018-01-04 21:00:00	3.9	5.4	5.8	4.9	#N/A	#N/A	#N/A	#N/A	#N/A	#N/A	#N/A	#N/A	#N/A	#N/A	#N/A	#N/A	#N/A	#N/A	#N/A	#N/A	#N/A	#N/A	#N/A	#N/A
2018-01-04 22:00:00	7.3	5.4	4.9	4.9	#N/A	#N/A	#N/A	#N/A	#N/A	#N/A	#N/A	#N/A	#N/A	#N/A	#N/A	#N/A	#N/A	#N/A	#N/A	#N/A	#N/A	#N/A	#N/A	#N/A
2018-01-04 23:00:00	7.2	5.4	4.4	4.9	#N/A	#N/A	#N/A	#N/A	#N/A	#N/A	#N/A	#N/A	#N/A	#N/A	#N/A	#N/A	#N/A	#N/A	#N/A	#N/A	#N/A	#N/A	#N/A	#N/A
2018-01-05	9.1	5.5	5.1	5.9	#N/A	#N/A	#N/A	#N/A	#N/A	#N/A	#N/A	#N/A	#N/A	#N/A	#N/A	#N/A	#N/A	#N/A	#N/A	#N/A	#N/A	#N/A	#N/A	#N/A
2018-01-05 01:00:00	8.9	5.5	4.8	5.9	#N/A	#N/A	#N/A	#N/A	#N/A	#N/A	#N/A	#N/A	#N/A	#N/A	#N/A	#N/A	#N/A	#N/A	#N/A	#N/A	#N/A	#N/A	#N/A	#N/A
2018-01-05 02:00:00	9.2	5.5	3.6	5.9	#N/A	#N/A	#N/A	#N/A	#N/A	#N/A	#N/A	#N/A	#N/A	#N/A	#N/A	#N/A	#N/A	#N/A	#N/A	#N/A	#N/A	#N/A	#N/A	#N/A
2018-01-05 03:00:00	3.6	5.5	4.1	5.9	#N/A	#N/A	#N/A	#N/A	#N/A	#N/A	#N/A	#N/A	#N/A	#N/A	#N/A	#N/A	#N/A	#N/A	#N/A	#N/A	#N/A	#N/A	#N/A	#N/A
2018-01-05 04:00:00	2	5.5	3.6	5.9	#N/A	#N/A	#N/A	#N/A	#N/A	#N/A	#N/A	#N/A	#N/A	#N/A	#N/A	#N/A	#N/A	#N/A	#N/A	#N/A	#N/A	#N/A	#N/A	#N/A
2018-01-05 05:00:00	1.8	5.5	3.8	5.9	#N/A	#N/A	#N/A	#N/A	#N/A	#N/A	#N/A	#N/A	#N/A	#N/A	#N/A	#N/A	#N/A	#N/A	#N/A	#N/A	#N/A	#N/A	#N/A	#N/A
2018-01-05 06:00:00	1.5	5.5	4	5.9	#N/A	#N/A	#N/A	#N/A	#N/A	#N/A	#N/A	#N/A	#N/A	#N/A	#N/A	#N/A	#N/A	#N/A	#N/A	#N/A	#N/A	#N/A	#N/A	#N/A
2018-01-05 07:00:00	1.2	5.5	4	5.9	#N/A	#N/A	#N/A	#N/A	#N/A	#N/A	#N/A	#N/A	#N/A	#N/A	#N/A	#N/A	#N/A	#N/A	#N/A	#N/A	#N/A	#N/A	#N/A	#N/A
2018-01-05 08:00:00	1.4	5.5	3	5.9	#N/A	#N/A	#N/A	#N/A	#N/A	#N/A	#N/A	#N/A	#N/A	#N/A	#N/A	#N/A	#N/A	#N/A	#N/A	#N/A	#N/A	#N/A	#N/A	#N/A
2018-01-05 09:00:00	4.9	5.5	3.2	5.9	#N/A	#N/A	#N/A	#N/A	#N/A	#N/A	#N/A	#N/A	#N/A	#N/A	#N/A	#N/A	#N/A	#N/A	#N/A	#N/A	#N/A	#N/A	#N/A	#N/A
2018-01-05 10:00:00	6.8	5.5	4.1	5.9	#N/A	#N/A	#N/A	#N/A	#N/A	#N/A	#N/A	#N/A	#N/A	#N/A	#N/A	#N/A	#N/A	#N/A	#N/A	#N/A	#N/A	#N/A	#N/A	#N/A
2018-01-05 11:00:00	9.6	5.5	7.5	5.9	#N/A	#N/A	#N/A	#N/A	#N/A	#N/A	#N/A	#N/A	#N/A	#N/A	#N/A	#N/A	#N/A	#N/A	#N/A	#N/A	#N/A	#N/A	#N/A	#N/A
2018-01-05 12:00:00	11.2	5.5	10.9	5.9	#N/A	#N/A	#N/A	#N/A	#N/A	#N/A	#N/A	#N/A	#N/A	#N/A	#N/A	#N/A	#N/A	#N/A	#N/A	#N/A	#N/A	#N/A	#N/A	#N/A
2018-01-05 13:00:00	12	5.5	12	5.9	#N/A	#N/A	#N/A	#N/A	#N/A	#N/A	#N/A	#N/A	#N/A	#N/A	#N/A	#N/A	#N/A	#N/A	#N/A	#N/A	#N/A	#N/A	#N/A	#N/A
2018-01-05 14:00:00	10.3	5.5	12.3	5.9	#N/A	#N/A	#N/A	#N/A	#N/A	#N/A	#N/A	#N/A	#N/A	#N/A	#N/A	#N/A	#N/A	#N/A	#N/A	#N/A	#N/A	#N/A	#N/A	#N/A
2018-01-05 15:00:00	10.3	5.5	11.7	5.9	#N/A	#N/A	#N/A	#N/A	#N/A	#N/A	#N/A	#N/A	#N/A	#N/A	#N/A	#N/A	#N/A	#N/A	#N/A	#N/A	#N/A	#N/A	#N/A	#N/A
2018-01-05 16:00:00	6.8	5.5	10.3	5.9	#N/A	#N/A	#N/A	#N/A	#N/A	#N/A	#N/A	#N/A	#N/A	#N/A	#N/A	#N/A	#N/A	#N/A	#N/A	#N/A	#N/A	#N/A	#N/A	#N/A
2018-01-05 17:00:00	4.4	5.5	7.2	5.9	#N/A	#N/A	#N/A	#N/A	#N/A	#N/A	#N/A	#N/A	#N/A	#N/A	#N/A	#N/A	#N/A	#N/A	#N/A	#N/A	#N/A	#N/A	#N/A	#N/A
2018-01-05 18:00:00	3.2	5.5	5.5	5.9	#N/A	#N/A	#N/A	#N/A	#N/A	#N/A	#N/A	#N/A	#N/A	#N/A	#N/A	#N/A	#N/A	#N/A	#N/A	#N/A	#N/A	#N/A	#N/A	#N/A
2018-01-05 19:00:00	2.3	5.5	5	5.9	#N/A	#N/A	#N/A	#N/A	#N/A	#N/A	#N/A	#N/A	#N/A	#N/A	#N/A	#N/A	#N/A	#N/A	#N/A	#N/A	#N/A	#N/A	#N/A	#N/A
2018-01-05 20:00:00	2.3	5.5	4.7	5.9	#N/A	#N/A	#N/A	#N/A	#N/A	#N/A	#N/A	#N/A	#N/A	#N/A	#N/A	#N/A	#N/A	#N/A	#N/A	#N/A	#N/A	#N/A	#N/A	#N/A
2018-01-05 21:00:00	2	5.5	4.4	5.9	#N/A	#N/A	#N/A	#N/A	#N/A	#N/A	#N/A	#N/A	#N/A	#N/A	#N/A	#N/A	#N/A	#N/A	#N/A	#N/A	#N/A	#N/A	#N/A	#N/A
2018-01-05 22:00:00	3.1	5.5	3.7	5.9	#N/A	#N/A	#N/A	#N/A	#N/A	#N/A	#N/A	#N/A	#N/A	#N/A	#N/A	#N/A	#N/A	#N/A	#N/A	#N/A	#N/A	#N/A	#N/A	#N/A
2018-01-05 23:00:00	4.8	5.5	3.3	5.9	#N/A	#N/A	#N/A	#N/A	#N/A	#N/A	#N/A	#N/A	#N/A	#N/A	#N/A	#N/A	#N/A	#N/A	#N/A	#N/A	#N/A	#N/A	#N/A	#N/A
2018-01-06	9.2	9.8	3.2	5.8	#N/A	#N/A	#N/A	#N/A	#N/A	#N/A	#N/A	#N/A	#N/A	#N/A	#N/A	#N/A	#N/A	#N/A	#N/A	#N/A	#N/A	#N/A	#N/A	#N/A
2018-01-06 01:00:00	9.2	9.8	3.1	5.8	#N/A	#N/A	#N/A	#N/A	#N/A	#N/A	#N/A	#N/A	#N/A	#N/A	#N/A	#N/A	#N/A	#N/A	#N/A	#N/A	#N/A	#N/A	#N/A	#N/A
2018-01-06 02:00:00	9.6	9.8	3.2	5.8	#N/A	#N/A	#N/A	#N/A	#N/A	#N/A	#N/A	#N/A	#N/A	#N/A	#N/A	#N/A	#N/A	#N/A	#N/A	#N/A	#N/A	#N/A	#N/A	#N/A
2018-01-06 03:00:00	9.6	9.8	2.8	5.8	#N/A	#N/A	#N/A	#N/A	#N/A	#N/A	#N/A	#N/A	#N/A	#N/A	#N/A	#N/A	#N/A	#N/A	#N/A	#N/A	#N/A	#N/A	#N/A	#N/A
2018-01-06 04:00:00	9.4	9.8	3.2	5.8	#N/A	#N/A	#N/A	#N/A	#N/A	#N/A	#N/A	#N/A	#N/A	#N/A	#N/A	#N/A	#N/A	#N/A	#N/A	#N/A	#N/A	#N/A	#N/A	#N/A
2018-01-06 05:00:00	9.7	9.8	3.1	5.8	#N/A	#N/A	#N/A	#N/A	#N/A	#N/A	#N/A	#N/A	#N/A	#N/A	#N/A	#N/A	#N/A	#N/A	#N/A	#N/A	#N/A	#N/A	#N/A	#N/A
2018-01-06 06:00:00	9.8	9.8	2.9	5.8	#N/A	#N/A	#N/A	#N/A	#N/A	#N/A	#N/A	#N/A	#N/A	#N/A	#N/A	#N/A	#N/A	#N/A	#N/A	#N/A	#N/A	#N/A	#N/A	#N/A
2018-01-06 07:00:00	9.2	9.8	3.2	5.8	#N/A	#N/A	#N/A	#N/A	#N/A	#N/A	#N/A	#N/A	#N/A	#N/A	#N/A	#N/A	#N/A	#N/A	#N/A	#N/A	#N/A	#N/A	#N/A	#N/A
2018-01-06 08:00:00	9.3	9.8	2.9	5.8	#N/A	#N/A	#N/A	#N/A	#N/A	#N/A	#N/A	#N/A	#N/A	#N/A	#N/A	#N/A	#N/A	#N/A	#N/A	#N/A	#N/A	#N/A	#N/A	#N/A
2018-01-06 09:00:00	10.4	9.8	3.3	5.8	#N/A	#N/A	#N/A	#N/A	#N/A	#N/A	#N/A	#N/A	#N/A	#N/A	#N/A	#N/A	#N/A	#N/A	#N/A	#N/A	#N/A	#N/A	#N/A	#N/A
2018-01-06 10:00:00	10.6	9.8	4.3	5.8	#N/A	#N/A	#N/A	#N/A	#N/A	#N/A	#N/A	#N/A	#N/A	#N/A	#N/A	#N/A	#N/A	#N/A	#N/A	#N/A	#N/A	#N/A	#N/A	#N/A
2018-01-06 11:00:00	10.3	9.8	8.6	5.8	#N/A	#N/A	#N/A	#N/A	#N/A	#N/A	#N/A	#N/A	#N/A	#N/A	#N/A	#N/A	#N/A	#N/A	#N/A	#N/A	#N/A	#N/A	#N/A	#N/A
2018-01-06 12:00:00	10.5	9.8	12.1	5.8	#N/A	#N/A	#N/A	#N/A	#N/A	#N/A	#N/A	#N/A	#N/A	#N/A	#N/A	#N/A	#N/A	#N/A	#N/A	#N/A	#N/A	#N/A	#N/A	#N/A
2018-01-06 13:00:00	11.5	9.8	12.7	5.8	#N/A	#N/A	#N/A	#N/A	#N/A	#N/A	#N/A	#N/A	#N/A	#N/A	#N/A	#N/A	#N/A	#N/A	#N/A	#N/A	#N/A	#N/A	#N/A	#N/A
2018-01-06 14:00:00	10.5	9.8	11.5	5.8	#N/A	#N/A	#N/A	#N/A	#N/A	#N/A	#N/A	#N/A	#N/A	#N/A	#N/A	#N/A	#N/A	#N/A	#N/A	#N/A	#N/A	#N/A	#N/A	#N/A
2018-01-06 15:00:00	10.3	9.8	8.5	5.8	#N/A	#N/A	#N/A	#N/A	#N/A	#N/A	#N/A	#N/A	#N/A	#N/A	#N/A	#N/A	#N/A	#N/A	#N/A	#N/A	#N/A	#N/A	#N/A	#N/A
2018-01-06 16:00:00	9.9	9.8	7.6	5.8	#N/A	#N/A	#N/A	#N/A	#N/A	#N/A	#N/A	#N/A	#N/A	#N/A	#N/A	#N/A	#N/A	#N/A	#N/A	#N/A	#N/A	#N/A	#N/A	#N/A
2018-01-06 17:00:00	9.6	9.8	6.6	5.8	#N/A	#N/A	#N/A	#N/A	#N/A	#N/A	#N/A	#N/A	#N/A	#N/A	#N/A	#N/A	#N/A	#N/A	#N/A	#N/A	#N/A	#N/A	#N/A	#N/A
2018-01-06 18:00:00	9.6	9.8	5.6	5.8	#N/A	#N/A	#N/A	#N/A	#N/A	#N/A	#N/A	#N/A	#N/A	#N/A	#N/A	#N/A	#N/A	#N/A	#N/A	#N/A	#N/A	#N/A	#N/A	#N/A
2018-01-06 19:00:00	6.8	9.8	5.3	5.8	#N/A	#N/A	#N/A	#N/A	#N/A	#N/A	#N/A	#N/A	#N/A	#N/A	#N/A	#N/A	#N/A	#N/A	#N/A	#N/A	#N/A	#N/A	#N/A	#N/A
2018-01-06 20:00:00	5.4	9.8	5.5	5.8	#N/A	#N/A	#N/A	#N/A	#N/A	#N/A	#N/A	#N/A	#N/A	#N/A	#N/A	#N/A	#N/A	#N/A	#N/A	#N/A	#N/A	#N/A	#N/A	#N/A
2018-01-06 21:00:00	10.9	9.8	5.7	5.8	#N/A	#N/A	#N/A	#N/A	#N/A	#N/A	#N/A	#N/A	#N/A	#N/A	#N/A	#N/A	#N/A	#N/A	#N/A	#N/A	#N/A	#N/A	#N/A	#N/A
2018-01-06 22:00:00	11.5	9.8	7	5.8	#N/A	#N/A	#N/A	#N/A	#N/A	#N/A	#N/A	#N/A	#N/A	#N/A	#N/A	#N/A	#N/A	#N/A	#N/A	#N/A	#N/A	#N/A	#N/A	#N/A
2018-01-06 23:00:00	11.4	9.8	6.5	5.8	#N/A	#N/A	#N/A	#N/A	#N/A	#N/A	#N/A	#N/A	#N/A	#N/A	#N/A	#N/A	#N/A	#N/A	#N/A	#N/A	#N/A	#N/A	#N/A	#N/A
2018-01-07	11.6	11.1	6.2	8	#N/A	#N/A	#N/A	#N/A	#N/A	#N/A	#N/A	#N/A	#N/A	#N/A	#N/A	#N/A	#N/A	#N/A	#N/A	#N/A	#N/A	#N/A	#N/A	#N/A
2018-01-07 01:00:00	8.1	11.1	7.3	8	#N/A	#N/A	#N/A	#N/A	#N/A	#N/A	#N/A	#N/A	#N/A	#N/A	#N/A	#N/A	#N/A	#N/A	#N/A	#N/A	#N/A	#N/A	#N/A	#N/A
2018-01-07 02:00:00	11.8	11.1	6.2	8	#N/A	#N/A	#N/A	#N/A	#N/A	#N/A	#N/A	#N/A	#N/A	#N/A	#N/A	#N/A	#N/A	#N/A	#N/A	#N/A	#N/A	#N/A	#N/A	#N/A
2018-01-07 03:00:00	13.1	11.1	6.9	8	#N/A	#N/A	#N/A	#N/A	#N/A	#N/A	#N/A	#N/A	#N/A	#N/A	#N/A	#N/A	#N/A	#N/A	#N/A	#N/A	#N/A	#N/A	#N/A	#N/A
2018-01-07 04:00:00	8.8	11.1	7.5	8	#N/A	#N/A	#N/A	#N/A	#N/A	#N/A	#N/A	#N/A	#N/A	#N/A	#N/A	#N/A	#N/A	#N/A	#N/A	#N/A	#N/A	#N/A	#N/A	#N/A
2018-01-07 05:00:00	7.7	11.1	7.1	8	#N/A	#N/A	#N/A	#N/A	#N/A	#N/A	#N/A	#N/A	#N/A	#N/A	#N/A	#N/A	#N/A	#N/A	#N/A	#N/A	#N/A	#N/A	#N/A	#N/A
2018-01-07 06:00:00	9.1	11.1	6.3	8	#N/A	#N/A	#N/A	#N/A	#N/A	#N/A	#N/A	#N/A	#N/A	#N/A	#N/A	#N/A	#N/A	#N/A	#N/A	#N/A	#N/A	#N/A	#N/A	#N/A
2018-01-07 07:00:00	6.7	11.1	6.1	8	#N/A	#N/A	#N/A	#N/A	#N/A	#N/A	#N/A	#N/A	#N/A	#N/A	#N/A	#N/A	#N/A	#N/A	#N/A	#N/A	#N/A	#N/A	#N/A	#N/A
2018-01-07 08:00:00	11.1	11.1	6.4	8	#N/A	#N/A	#N/A	#N/A	#N/A	#N/A	#N/A	#N/A	#N/A	#N/A	#N/A	#N/A	#N/A	#N/A	#N/A	#N/A	#N/A	#N/A	#N/A	#N/A
2018-01-07 09:00:00	11.1	11.1	6.8	8	#N/A	#N/A	#N/A	#N/A	#N/A	#N/A	#N/A	#N/A	#N/A	#N/A	#N/A	#N/A	#N/A	#N/A	#N/A	#N/A	#N/A	#N/A	#N/A	#N/A
2018-01-07 10:00:00	13.8	11.1	7.6	8	#N/A	#N/A	#N/A	#N/A	#N/A	#N/A	#N/A	#N/A	#N/A	#N/A	#N/A	#N/A	#N/A	#N/A	#N/A	#N/A	#N/A	#N/A	#N/A	#N/A
2018-01-07 11:00:00	14.2	11.1	11.5	8	#N/A	#N/A	#N/A	#N/A	#N/A	#N/A	#N/A	#N/A	#N/A	#N/A	#N/A	#N/A	#N/A	#N/A	#N/A	#N/A	#N/A	#N/A	#N/A	#N/A
2018-01-07 12:00:00	14.1	11.1	11.9	8	#N/A	#N/A	#N/A	#N/A	#N/A	#N/A	#N/A	#N/A	#N/A	#N/A	#N/A	#N/A	#N/A	#N/A	#N/A	#N/A	#N/A	#N/A	#N/A	#N/A
2018-01-07 13:00:00	13.6	11.1	11.3	8	#N/A	#N/A	#N/A	#N/A	#N/A	#N/A	#N/A	#N/A	#N/A	#N/A	#N/A	#N/A	#N/A	#N/A	#N/A	#N/A	#N/A	#N/A	#N/A	#N/A
2018-01-07 14:00:00	13.2	11.1	11	8	#N/A	#N/A	#N/A	#N/A	#N/A	#N/A	#N/A	#N/A	#N/A	#N/A	#N/A	#N/A	#N/A	#N/A	#N/A	#N/A	#N/A	#N/A	#N/A	#N/A
2018-01-07 15:00:00	12.6	11.1	10.3	8	#N/A	#N/A	#N/A	#N/A	#N/A	#N/A	#N/A	#N/A	#N/A	#N/A	#N/A	#N/A	#N/A	#N/A	#N/A	#N/A	#N/A	#N/A	#N/A	#N/A
2018-01-07 16:00:00	12.5	11.1	9.8	8	#N/A	#N/A	#N/A	#N/A	#N/A	#N/A	#N/A	#N/A	#N/A	#N/A	#N/A	#N/A	#N/A	#N/A	#N/A	#N/A	#N/A	#N/A	#N/A	#N/A
2018-01-07 17:00:00	12.7	11.1	9.1	8	#N/A	#N/A	#N/A	#N/A	#N/A	#N/A	#N/A	#N/A	#N/A	#N/A	#N/A	#N/A	#N/A	#N/A	#N/A	#N/A	#N/A	#N/A	#N/A	#N/A
2018-01-07 18:00:00	11.5	11.1	9.3	8	#N/A	#N/A	#N/A	#N/A	#N/A	#N/A	#N/A	#N/A	#N/A	#N/A	#N/A	#N/A	#N/A	#N/A	#N/A	#N/A	#N/A	#N/A	#N/A	#N/A
2018-01-07 19:00:00	11.7	11.1	8.8	8	#N/A	#N/A	#N/A	#N/A	#N/A	#N/A	#N/A	#N/A	#N/A	#N/A	#N/A	#N/A	#N/A	#N/A	#N/A	#N/A	#N/A	#N/A	#N/A	#N/A
2018-01-07 20:00:00	10.4	11.1	7.4	8	#N/A	#N/A	#N/A	#N/A	#N/A	#N/A	#N/A	#N/A	#N/A	#N/A	#N/A	#N/A	#N/A	#N/A	#N/A	#N/A	#N/A	#N/A	#N/A	#N/A
2018-01-07 21:00:00	9.3	11.1	6.6	8	#N/A	#N/A	#N/A	#N/A	#N/A	#N/A	#N/A	#N/A	#N/A	#N/A	#N/A	#N/A	#N/A	#N/A	#N/A	#N/A	#N/A	#N/A	#N/A	#N/A
2018-01-07 22:00:00	8.7	11.1	5.3	8	#N/A	#N/A	#N/A	#N/A	#N/A	#N/A	#N/A	#N/A	#N/A	#N/A	#N/A	#N/A	#N/A	#N/A	#N/A	#N/A	#N/A	#N/A	#N/A	#N/A
2018-01-07 23:00:00	9.6	11.1	5.3	8	#N/A	#N/A	#N/A	#N/A	#N/A	#N/A	#N/A	#N/A	#N/A	#N/A	#N/A	#N/A	#N/A	#N/A	#N/A	#N/A	#N/A	#N/A	#N/A	#N/A
2018-01-08	7.7	7.8	5.8	5.4	#N/A	10.5	10.5	2.2	10.1	2.2	#N/A	8.7	8.7	1.8	7.7	1.8	#N/A	#N/A	#N/A	#N/A	#N/A	#N/A	#N/A	#N/A
2018-01-08 01:00:00	10.2	7.8	5.4	5.4	#N/A	10.6	10.6	2.2	10.1	2.2	#N/A	8.5	8.5	1.8	7.7	1.8	#N/A	#N/A	#N/A	#N/A	#N/A	#N/A	#N/A	#N/A
2018-01-08 02:00:00	8.7	7.8	6.3	5.4	#N/A	10.2	10.2	2.2	10.1	2.2	#N/A	8	8	1.8	7.7	1.8	#N/A	#N/A	#N/A	#N/A	#N/A	#N/A	#N/A	#N/A
2018-01-08 03:00:00	9.9	7.8	6.8	5.4	#N/A	10	10	2.2	10.1	2.2	#N/A	7.7	7.7	1.8	7.7	1.8	#N/A	#N/A	#N/A	#N/A	#N/A	#N/A	#N/A	#N/A
2018-01-08 04:00:00	10	7.8	7.1	5.4	#N/A	9.8	9.8	2.2	10.1	2.2	#N/A	7.3	7.3	1.8	7.7	1.8	#N/A	#N/A	#N/A	#N/A	#N/A	#N/A	#N/A	#N/A
2018-01-08 05:00:00	9.9	7.8	6	5.4	#N/A	10.1	10.1	2.2	10.1	2.2	#N/A	7.3	7.3	1.8	7.7	1.8	#N/A	#N/A	#N/A	#N/A	#N/A	#N/A	#N/A	#N/A
2018-01-08 06:00:00	10.3	7.8	7	5.4	#N/A	9.6	9.6	2.2	10.1	2.2	#N/A	7.5	7.5	1.8	7.7	1.8	#N/A	#N/A	#N/A	#N/A	#N/A	#N/A	#N/A	#N/A
2018-01-08 07:00:00	6.3	7.8	5.7	5.4	#N/A	10.4	10.4	2.2	10.1	2.2	#N/A	7.4	7.4	1.8	7.7	1.8	#N/A	#N/A	#N/A	#N/A	#N/A	#N/A	#N/A	#N/A
2018-01-08 08:00:00	6.4	7.8	4.9	5.4	#N/A	10	10	2.2	10.1	2.2	#N/A	7.7	7.7	1.8	7.7	1.8	#N/A	#N/A	#N/A	#N/A	#N/A	#N/A	#N/A	#N/A
2018-01-08 09:00:00	7.1	7.8	5	5.4	#N/A	10.3	10.3	2.2	10.1	2.2	#N/A	7.9	7.9	1.8	7.7	1.8	#N/A	#N/A	#N/A	#N/A	#N/A	#N/A	#N/A	#N/A
2018-01-08 10:00:00	10.9	7.8	6.3	5.4	#N/A	10.4	10.4	2.2	10.1	2.2	#N/A	8.1	8.1	1.8	7.7	1.8	#N/A	#N/A	#N/A	#N/A	#N/A	#N/A	#N/A	#N/A
2018-01-08 11:00:00	11	7.8	7.1	5.4	#N/A	10.4	10.4	2.2	10.1	2.2	#N/A	7.7	7.7	1.8	7.7	1.8	#N/A	#N/A	#N/A	#N/A	#N/A	#N/A	#N/A	#N/A
2018-01-08 12:00:00	8.7	7.8	6	5.4	#N/A	10.5	10.5	2.2	10.1	2.2	#N/A	8.1	8.1	1.8	7.7	1.8	#N/A	#N/A	#N/A	#N/A	#N/A	#N/A	#N/A	#N/A
2018-01-08 13:00:00	7.7	7.8	5.6	5.4	#N/A	9.4	9.4	2.2	10.1	2.2	#N/A	7.6	7.6	1.8	7.7	1.8	#N/A	#N/A	#N/A	#N/A	#N/A	#N/A	#N/A	#N/A
2018-01-08 14:00:00	8.2	7.8	5.7	5.4	#N/A	9.4	9.4	2.2	10.1	2.2	#N/A	7.3	7.3	1.8	7.7	1.8	#N/A	#N/A	#N/A	#N/A	#N/A	#N/A	#N/A	#N/A
2018-01-08 15:00:00	6.9	7.8	5.6	5.4	#N/A	9.6	9.6	2.2	10.1	2.2	#N/A	7.3	7.3	1.8	7.7	1.8	#N/A	#N/A	#N/A	#N/A	#N/A	#N/A	#N/A	#N/A
2018-01-08 16:00:00	6.3	7.8	5.2	5.4	#N/A	10.7	10.7	2.2	10.1	2.2	#N/A	7.8	7.8	1.8	7.7	1.8	#N/A	#N/A	#N/A	#N/A	#N/A	#N/A	#N/A	#N/A
2018-01-08 17:00:00	6.4	7.8	5.1	5.4	#N/A	10.8	10.8	2.2	10.1	2.2	#N/A	8.1	8.1	1.8	7.7	1.8	#N/A	#N/A	#N/A	#N/A	#N/A	#N/A	#N/A	#N/A
2018-01-08 18:00:00	6.1	7.8	4.7	5.4	#N/A	10.1	10.1	2.2	10.1	2.2	#N/A	7.7	7.7	1.8	7.7	1.8	#N/A	#N/A	#N/A	#N/A	#N/A	#N/A	#N/A	#N/A
2018-01-08 19:00:00	5.4	7.8	4.3	5.4	#N/A	9.8	9.8	2.2	10.1	2.2	#N/A	7.6	7.6	1.8	7.7	1.8	#N/A	#N/A	#N/A	#N/A	#N/A	#N/A	#N/A	#N/A
2018-01-08 20:00:00	5.9	7.8	3.9	5.4	#N/A	10	10	2.2	10.1	2.2	#N/A	7.6	7.6	1.8	7.7	1.8	#N/A	#N/A	#N/A	#N/A	#N/A	#N/A	#N/A	#N/A
2018-01-08 21:00:00	5	7.8	3.5	5.4	#N/A	9.6	9.6	2.2	10.1	2.2	#N/A	7.6	7.6	1.8	7.7	1.8	#N/A	#N/A	#N/A	#N/A	#N/A	#N/A	#N/A	#N/A
2018-01-08 22:00:00	6.5	7.8	3.4	5.4	#N/A	9.5	9.5	2.2	10.1	2.2	#N/A	7.5	7.5	1.8	7.7	1.8	#N/A	#N/A	#N/A	#N/A	#N/A	#N/A	#N/A	#N/A
2018-01-08 23:00:00	6.8	7.8	3.2	5.4	#N/A	9.6	9.6	2.2	10.1	2.2	#N/A	7.5	7.5	1.8	7.7	1.8	#N/A	#N/A	#N/A	#N/A	#N/A	#N/A	#N/A	#N/A
2018-01-09	7	3.4	3.2	2	#N/A	9.5	9.5	2.2	9.3	2.2	#N/A	7.3	7.3	1.8	6.8	1.8	#N/A	#N/A	#N/A	#N/A	#N/A	#N/A	#N/A	#N/A
2018-01-09 01:00:00	7.1	3.4	3.1	2	#N/A	9.3	9.3	2.2	9.3	2.2	#N/A	7.2	7.2	1.8	6.8	1.8	#N/A	#N/A	#N/A	#N/A	#N/A	#N/A	#N/A	#N/A
2018-01-09 02:00:00	4.4	3.4	2.9	2	#N/A	9.5	9.5	2.2	9.3	2.2	#N/A	7.1	7.1	1.8	6.8	1.8	#N/A	#N/A	#N/A	#N/A	#N/A	#N/A	#N/A	#N/A
2018-01-09 03:00:00	3.7	3.4	2.1	2	#N/A	9.2	9.2	2.2	9.3	2.2	#N/A	6.9	6.9	1.8	6.8	1.8	#N/A	#N/A	#N/A	#N/A	#N/A	#N/A	#N/A	#N/A
2018-01-09 04:00:00	3.9	3.4	2	2	#N/A	9.7	9.7	2.2	9.3	2.2	#N/A	6.9	6.9	1.8	6.8	1.8	#N/A	#N/A	#N/A	#N/A	#N/A	#N/A	#N/A	#N/A
2018-01-09 05:00:00	4	3.4	2.3	2	#N/A	9.8	9.8	2.2	9.3	2.2	#N/A	6.9	6.9	1.8	6.8	1.8	#N/A	#N/A	#N/A	#N/A	#N/A	#N/A	#N/A	#N/A
2018-01-09 06:00:00	3.9	3.4	2.2	2	#N/A	9.9	9.9	2.2	9.3	2.2	#N/A	6.9	6.9	1.8	6.8	1.8	#N/A	#N/A	#N/A	#N/A	#N/A	#N/A	#N/A	#N/A
2018-01-09 07:00:00	4	3.4	2.3	2	#N/A	10	10	2.2	9.3	2.2	#N/A	6.9	6.9	1.8	6.8	1.8	#N/A	#N/A	#N/A	#N/A	#N/A	#N/A	#N/A	#N/A
2018-01-09 08:00:00	5	3.4	2.4	2	#N/A	9.2	9.2	2.2	9.3	2.2	#N/A	6.8	6.8	1.8	6.8	1.8	#N/A	#N/A	#N/A	#N/A	#N/A	#N/A	#N/A	#N/A
2018-01-09 09:00:00	4.4	3.4	2.7	2	#N/A	9	9	2.2	9.3	2.2	#N/A	6.6	6.6	1.8	6.8	1.8	#N/A	#N/A	#N/A	#N/A	#N/A	#N/A	#N/A	#N/A
2018-01-09 10:00:00	4.6	3.4	2.6	2	#N/A	9.1	9.1	2.2	9.3	2.2	#N/A	6.5	6.5	1.8	6.8	1.8	#N/A	#N/A	#N/A	#N/A	#N/A	#N/A	#N/A	#N/A
2018-01-09 11:00:00	5	3.4	2.8	2	#N/A	9.1	9.1	2.2	9.3	2.2	#N/A	6.6	6.6	1.8	6.8	1.8	#N/A	#N/A	#N/A	#N/A	#N/A	#N/A	#N/A	#N/A
2018-01-09 12:00:00	4.9	3.4	3.5	2	#N/A	9.1	9.1	2.2	9.3	2.2	#N/A	6.6	6.6	1.8	6.8	1.8	#N/A	#N/A	#N/A	#N/A	#N/A	#N/A	#N/A	#N/A
2018-01-09 13:00:00	4.7	3.4	3.3	2	#N/A	9.1	9.1	2.2	9.3	2.2	#N/A	6.6	6.6	1.8	6.8	1.8	#N/A	#N/A	#N/A	#N/A	#N/A	#N/A	#N/A	#N/A
2018-01-09 14:00:00	4.6	3.4	3.3	2	#N/A	9.4	9.4	2.2	9.3	2.2	#N/A	6.6	6.6	1.8	6.8	1.8	#N/A	#N/A	#N/A	#N/A	#N/A	#N/A	#N/A	#N/A
2018-01-09 15:00:00	4.5	3.4	3.1	2	#N/A	9.2	9.2	2.2	9.3	2.2	#N/A	6.7	6.7	1.8	6.8	1.8	#N/A	#N/A	#N/A	#N/A	#N/A	#N/A	#N/A	#N/A
2018-01-09 16:00:00	4.3	3.4	2.8	2	#N/A	9.2	9.2	2.2	9.3	2.2	#N/A	6.7	6.7	1.8	6.8	1.8	#N/A	#N/A	#N/A	#N/A	#N/A	#N/A	#N/A	#N/A
2018-01-09 17:00:00	1.7	3.4	1.2	2	#N/A	9.4	9.4	2.2	9.3	2.2	#N/A	6.8	6.8	1.8	6.8	1.8	#N/A	#N/A	#N/A	#N/A	#N/A	#N/A	#N/A	#N/A
2018-01-09 18:00:00	-0.2	3.4	-0.3	2	#N/A	9.3	9.3	2.2	9.3	2.2	#N/A	7.1	7.1	1.8	6.8	1.8	#N/A	#N/A	#N/A	#N/A	#N/A	#N/A	#N/A	#N/A
2018-01-09 19:00:00	-0.7	3.4	-0.5	2	#N/A	9.3	9.3	2.2	9.3	2.2	#N/A	7	7	1.8	6.8	1.8	#N/A	#N/A	#N/A	#N/A	#N/A	#N/A	#N/A	#N/A
2018-01-09 20:00:00	-0.3	3.4	-0.6	2	#N/A	9.2	9.2	2.2	9.3	2.2	#N/A	7	7	1.8	6.8	1.8	#N/A	#N/A	#N/A	#N/A	#N/A	#N/A	#N/A	#N/A
2018-01-09 21:00:00	0.2	3.4	-0.1	2	#N/A	9.2	9.2	2.2	9.3	2.2	#N/A	6.9	6.9	1.8	6.8	1.8	#N/A	#N/A	#N/A	#N/A	#N/A	#N/A	#N/A	#N/A
2018-01-09 22:00:00	0.4	3.4	0.9	2	#N/A	9.2	9.2	2.2	9.3	2.2	#N/A	6.8	6.8	1.8	6.8	1.8	#N/A	#N/A	#N/A	#N/A	#N/A	#N/A	#N/A	#N/A
2018-01-09 23:00:00	0.5	3.4	1.1	2	#N/A	8.4	8.4	2.2	9.3	2.2	#N/A	6.2	6.2	1.8	6.8	1.8	#N/A	#N/A	#N/A	#N/A	#N/A	#N/A	#N/A	#N/A
2018-01-10	1	1.9	0.9	1.2	#N/A	7.8	7.8	2.2	8.4	2.2	#N/A	5.7	5.7	1.8	6.1	1.8	#N/A	#N/A	#N/A	#N/A	#N/A	#N/A	#N/A	#N/A
2018-01-10 01:00:00	0.5	1.9	0.4	1.2	#N/A	7.7	7.7	2.2	8.4	2.2	#N/A	5.6	5.6	1.8	6.1	1.8	#N/A	#N/A	#N/A	#N/A	#N/A	#N/A	#N/A	#N/A
2018-01-10 02:00:00	0.6	1.9	0.5	1.2	#N/A	7.8	7.8	2.2	8.4	2.2	#N/A	5.6	5.6	1.8	6.1	1.8	#N/A	#N/A	#N/A	#N/A	#N/A	#N/A	#N/A	#N/A
2018-01-10 03:00:00	1.3	1.9	0.7	1.2	#N/A	8	8	2.2	8.4	2.2	#N/A	5.7	5.7	1.8	6.1	1.8	#N/A	#N/A	#N/A	#N/A	#N/A	#N/A	#N/A	#N/A
2018-01-10 04:00:00	1.2	1.9	0.9	1.2	#N/A	8.1	8.1	2.2	8.4	2.2	#N/A	6.1	6.1	1.8	6.1	1.8	#N/A	#N/A	#N/A	#N/A	#N/A	#N/A	#N/A	#N/A
2018-01-10 05:00:00	1.3	1.9	0.6	1.2	#N/A	8.1	8.1	2.2	8.4	2.2	#N/A	6.2	6.2	1.8	6.1	1.8	#N/A	#N/A	#N/A	#N/A	#N/A	#N/A	#N/A	#N/A
2018-01-10 06:00:00	0.6	1.9	0.2	1.2	#N/A	8.3	8.3	2.2	8.4	2.2	#N/A	6.1	6.1	1.8	6.1	1.8	#N/A	#N/A	#N/A	#N/A	#N/A	#N/A	#N/A	#N/A
2018-01-10 07:00:00	1	1.9	0.2	1.2	#N/A	8.1	8.1	2.2	8.4	2.2	#N/A	5.9	5.9	1.8	6.1	1.8	#N/A	#N/A	#N/A	#N/A	#N/A	#N/A	#N/A	#N/A
2018-01-10 08:00:00	1.3	1.9	0.7	1.2	#N/A	8.1	8.1	2.2	8.4	2.2	#N/A	5.9	5.9	1.8	6.1	1.8	#N/A	#N/A	#N/A	#N/A	#N/A	#N/A	#N/A	#N/A
2018-01-10 09:00:00	2	1.9	1.3	1.2	#N/A	8.3	8.3	2.2	8.4	2.2	#N/A	6	6	1.8	6.1	1.8	#N/A	#N/A	#N/A	#N/A	#N/A	#N/A	#N/A	#N/A
2018-01-10 10:00:00	2.7	1.9	1.7	1.2	#N/A	8.3	8.3	2.2	8.4	2.2	#N/A	6	6	1.8	6.1	1.8	#N/A	#N/A	#N/A	#N/A	#N/A	#N/A	#N/A	#N/A
2018-01-10 11:00:00	3.6	1.9	2.2	1.2	#N/A	8.3	8.3	2.2	8.4	2.2	#N/A	5.9	5.9	1.8	6.1	1.8	#N/A	#N/A	#N/A	#N/A	#N/A	#N/A	#N/A	#N/A
2018-01-10 12:00:00	3.7	1.9	2.8	1.2	#N/A	8.1	8.1	2.2	8.4	2.2	#N/A	5.8	5.8	1.8	6.1	1.8	#N/A	#N/A	#N/A	#N/A	#N/A	#N/A	#N/A	#N/A
2018-01-10 13:00:00	4	1.9	2.9	1.2	#N/A	8.2	8.2	2.2	8.4	2.2	#N/A	5.7	5.7	1.8	6.1	1.8	#N/A	#N/A	#N/A	#N/A	#N/A	#N/A	#N/A	#N/A
2018-01-10 14:00:00	4.2	1.9	3.1	1.2	#N/A	8.3	8.3	2.2	8.4	2.2	#N/A	5.9	5.9	1.8	6.1	1.8	#N/A	#N/A	#N/A	#N/A	#N/A	#N/A	#N/A	#N/A
2018-01-10 15:00:00	4.5	1.9	3.1	1.2	#N/A	8.4	8.4	2.2	8.4	2.2	#N/A	6.1	6.1	1.8	6.1	1.8	#N/A	#N/A	#N/A	#N/A	#N/A	#N/A	#N/A	#N/A
2018-01-10 16:00:00	4.2	1.9	2.7	1.2	#N/A	8.6	8.6	2.2	8.4	2.2	#N/A	6.2	6.2	1.8	6.1	1.8	#N/A	#N/A	#N/A	#N/A	#N/A	#N/A	#N/A	#N/A
2018-01-10 17:00:00	3.1	1.9	1.9	1.2	#N/A	8.9	8.9	2.2	8.4	2.2	#N/A	6.4	6.4	1.8	6.1	1.8	#N/A	#N/A	#N/A	#N/A	#N/A	#N/A	#N/A	#N/A
2018-01-10 18:00:00	2.9	1.9	1.6	1.2	#N/A	8.9	8.9	2.2	8.4	2.2	#N/A	6.6	6.6	1.8	6.1	1.8	#N/A	#N/A	#N/A	#N/A	#N/A	#N/A	#N/A	#N/A
2018-01-10 19:00:00	1.4	1.9	0.5	1.2	#N/A	8.9	8.9	2.2	8.4	2.2	#N/A	6.6	6.6	1.8	6.1	1.8	#N/A	#N/A	#N/A	#N/A	#N/A	#N/A	#N/A	#N/A
2018-01-10 20:00:00	0.9	1.9	0.1	1.2	#N/A	9	9	2.2	8.4	2.2	#N/A	6.7	6.7	1.8	6.1	1.8	#N/A	#N/A	#N/A	#N/A	#N/A	#N/A	#N/A	#N/A
2018-01-10 21:00:00	0.8	1.9	0.4	1.2	#N/A	9.1	9.1	2.2	8.4	2.2	#N/A	6.7	6.7	1.8	6.1	1.8	#N/A	#N/A	#N/A	#N/A	#N/A	#N/A	#N/A	#N/A
2018-01-10 22:00:00	-0.6	1.9	-0.7	1.2	#N/A	8.9	8.9	2.2	8.4	2.2	#N/A	6.5	6.5	1.8	6.1	1.8	#N/A	#N/A	#N/A	#N/A	#N/A	#N/A	#N/A	#N/A
2018-01-10 23:00:00	-1.2	1.9	-0.8	1.2	#N/A	8.6	8.6	2.2	8.4	2.2	#N/A	6.2	6.2	1.8	6.1	1.8	#N/A	#N/A	#N/A	#N/A	#N/A	#N/A	#N/A	#N/A
2018-01-11	-0.4	0.4	-0.9	-0.2	#N/A	8.5	8.5	2.2	7.7	2.2	#N/A	6.1	6.1	1.8	5.4	1.8	#N/A	#N/A	#N/A	#N/A	#N/A	#N/A	#N/A	#N/A
2018-01-11 01:00:00	-0.5	0.4	-0.3	-0.2	#N/A	8.1	8.1	2.2	7.7	2.2	#N/A	5.7	5.7	1.8	5.4	1.8	#N/A	#N/A	#N/A	#N/A	#N/A	#N/A	#N/A	#N/A
2018-01-11 02:00:00	-0.9	0.4	-1	-0.2	#N/A	7.9	7.9	2.2	7.7	2.2	#N/A	5.5	5.5	1.8	5.4	1.8	#N/A	#N/A	#N/A	#N/A	#N/A	#N/A	#N/A	#N/A
2018-01-11 03:00:00	-1.3	0.4	-1.5	-0.2	#N/A	7.8	7.8	2.2	7.7	2.2	#N/A	5.6	5.6	1.8	5.4	1.8	#N/A	#N/A	#N/A	#N/A	#N/A	#N/A	#N/A	#N/A
2018-01-11 04:00:00	-1.7	0.4	-1.6	-0.2	#N/A	7.4	7.4	2.2	7.7	2.2	#N/A	5.2	5.2	1.8	5.4	1.8	#N/A	#N/A	#N/A	#N/A	#N/A	#N/A	#N/A	#N/A
2018-01-11 05:00:00	-1.7	0.4	-2	-0.2	#N/A	7.2	7.2	2.2	7.7	2.2	#N/A	5.2	5.2	1.8	5.4	1.8	#N/A	#N/A	#N/A	#N/A	#N/A	#N/A	#N/A	#N/A
2018-01-11 06:00:00	-1.8	0.4	-2.3	-0.2	#N/A	7.4	7.4	2.2	7.7	2.2	#N/A	5.1	5.1	1.8	5.4	1.8	#N/A	#N/A	#N/A	#N/A	#N/A	#N/A	#N/A	#N/A
2018-01-11 07:00:00	-2	0.4	-2.6	-0.2	#N/A	7.4	7.4	2.2	7.7	2.2	#N/A	5.3	5.3	1.8	5.4	1.8	#N/A	#N/A	#N/A	#N/A	#N/A	#N/A	#N/A	#N/A
2018-01-11 08:00:00	-1.8	0.4	-2.6	-0.2	#N/A	7.3	7.3	2.2	7.7	2.2	#N/A	5.1	5.1	1.8	5.4	1.8	#N/A	#N/A	#N/A	#N/A	#N/A	#N/A	#N/A	#N/A
2018-01-11 09:00:00	1.4	0.4	-2.2	-0.2	#N/A	7.1	7.1	2.2	7.7	2.2	#N/A	4.8	4.8	1.8	5.4	1.8	#N/A	#N/A	#N/A	#N/A	#N/A	#N/A	#N/A	#N/A
2018-01-11 10:00:00	3.1	0.4	-2	-0.2	#N/A	7	7	2.2	7.7	2.2	#N/A	4.8	4.8	1.8	5.4	1.8	#N/A	#N/A	#N/A	#N/A	#N/A	#N/A	#N/A	#N/A
2018-01-11 11:00:00	3.8	0.4	1.6	-0.2	#N/A	7	7	2.2	7.7	2.2	#N/A	4.6	4.6	1.8	5.4	1.8	#N/A	#N/A	#N/A	#N/A	#N/A	#N/A	#N/A	#N/A
2018-01-11 12:00:00	5.2	0.4	3.8	-0.2	#N/A	6.9	6.9	2.2	7.7	2.2	#N/A	4.5	4.5	1.8	5.4	1.8	#N/A	#N/A	#N/A	#N/A	#N/A	#N/A	#N/A	#N/A
2018-01-11 13:00:00	6.2	0.4	5.1	-0.2	#N/A	6.8	6.8	2.2	7.7	2.2	#N/A	4.3	4.3	1.8	5.4	1.8	#N/A	#N/A	#N/A	#N/A	#N/A	#N/A	#N/A	#N/A
2018-01-11 14:00:00	6.7	0.4	5.4	-0.2	#N/A	6.9	6.9	2.2	7.7	2.2	#N/A	4.3	4.3	1.8	5.4	1.8	#N/A	#N/A	#N/A	#N/A	#N/A	#N/A	#N/A	#N/A
2018-01-11 15:00:00	4.2	0.4	4.7	-0.2	#N/A	7.8	7.8	2.2	7.7	2.2	#N/A	4.4	4.4	1.8	5.4	1.8	#N/A	#N/A	#N/A	#N/A	#N/A	#N/A	#N/A	#N/A
2018-01-11 16:00:00	1.9	0.4	3.2	-0.2	#N/A	8.2	8.2	2.2	7.7	2.2	#N/A	4.5	4.5	1.8	5.4	1.8	#N/A	#N/A	#N/A	#N/A	#N/A	#N/A	#N/A	#N/A
2018-01-11 17:00:00	-0.4	0.4	0.4	-0.2	#N/A	8.4	8.4	2.2	7.7	2.2	#N/A	5.8	5.8	1.8	5.4	1.8	#N/A	#N/A	#N/A	#N/A	#N/A	#N/A	#N/A	#N/A
2018-01-11 18:00:00	-1	0.4	-0.8	-0.2	#N/A	8.8	8.8	2.2	7.7	2.2	#N/A	6.5	6.5	1.8	5.4	1.8	#N/A	#N/A	#N/A	#N/A	#N/A	#N/A	#N/A	#N/A
2018-01-11 19:00:00	-1.5	0.4	-0.7	-0.2	#N/A	9.1	9.1	2.2	7.7	2.2	#N/A	7	7	1.8	5.4	1.8	#N/A	#N/A	#N/A	#N/A	#N/A	#N/A	#N/A	#N/A
2018-01-11 20:00:00	-1.8	0.4	-1.4	-0.2	#N/A	9.2	9.2	2.2	7.7	2.2	#N/A	7.1	7.1	1.8	5.4	1.8	#N/A	#N/A	#N/A	#N/A	#N/A	#N/A	#N/A	#N/A
2018-01-11 21:00:00	-1.9	0.4	-2	-0.2	#N/A	8.4	8.4	2.2	7.7	2.2	#N/A	6.8	6.8	1.8	5.4	1.8	#N/A	#N/A	#N/A	#N/A	#N/A	#N/A	#N/A	#N/A
2018-01-11 22:00:00	-2.4	0.4	-2.5	-0.2	#N/A	7.7	7.7	2.2	7.7	2.2	#N/A	6.2	6.2	1.8	5.4	1.8	#N/A	#N/A	#N/A	#N/A	#N/A	#N/A	#N/A	#N/A
2018-01-11 23:00:00	-2.6	0.4	-2.9	-0.2	#N/A	7	7	2.2	7.7	2.2	#N/A	5.2	5.2	1.8	5.4	1.8	#N/A	#N/A	#N/A	#N/A	#N/A	#N/A	#N/A	#N/A
2018-01-12	-2.6	-0.1	-3.2	-0.1	#N/A	6.7	6.7	2.2	6.7	2.2	#N/A	4.7	4.7	1.8	4.5	1.8	#N/A	#N/A	#N/A	#N/A	#N/A	#N/A	#N/A	#N/A
2018-01-12 01:00:00	-2.9	-0.1	-3.4	-0.1	#N/A	6.5	6.5	2.2	6.7	2.2	#N/A	4.7	4.7	1.8	4.5	1.8	#N/A	#N/A	#N/A	#N/A	#N/A	#N/A	#N/A	#N/A
2018-01-12 02:00:00	-3.1	-0.1	-3.3	-0.1	#N/A	6.4	6.4	2.2	6.7	2.2	#N/A	4.4	4.4	1.8	4.5	1.8	#N/A	#N/A	#N/A	#N/A	#N/A	#N/A	#N/A	#N/A
2018-01-12 03:00:00	-3.4	-0.1	-3.7	-0.1	#N/A	6.3	6.3	2.2	6.7	2.2	#N/A	4.2	4.2	1.8	4.5	1.8	#N/A	#N/A	#N/A	#N/A	#N/A	#N/A	#N/A	#N/A
2018-01-12 04:00:00	-3.6	-0.1	-3.8	-0.1	#N/A	6.2	6.2	2.2	6.7	2.2	#N/A	4	4	1.8	4.5	1.8	#N/A	#N/A	#N/A	#N/A	#N/A	#N/A	#N/A	#N/A
2018-01-12 05:00:00	-3.5	-0.1	-3.8	-0.1	#N/A	6.1	6.1	2.2	6.7	2.2	#N/A	3.8	3.8	1.8	4.5	1.8	#N/A	#N/A	#N/A	#N/A	#N/A	#N/A	#N/A	#N/A
2018-01-12 06:00:00	-4	-0.1	-3.8	-0.1	#N/A	6	6	2.2	6.7	2.2	#N/A	3.6	3.6	1.8	4.5	1.8	#N/A	#N/A	#N/A	#N/A	#N/A	#N/A	#N/A	#N/A
2018-01-12 07:00:00	-4.2	-0.1	-4	-0.1	#N/A	5.9	5.9	2.2	6.7	2.2	#N/A	3.6	3.6	1.8	4.5	1.8	#N/A	#N/A	#N/A	#N/A	#N/A	#N/A	#N/A	#N/A
2018-01-12 08:00:00	-3.9	-0.1	-4	-0.1	#N/A	5.8	5.8	2.2	6.7	2.2	#N/A	3.5	3.5	1.8	4.5	1.8	#N/A	#N/A	#N/A	#N/A	#N/A	#N/A	#N/A	#N/A
2018-01-12 09:00:00	0.6	-0.1	-3.7	-0.1	#N/A	5.7	5.7	2.2	6.7	2.2	#N/A	3.4	3.4	1.8	4.5	1.8	#N/A	#N/A	#N/A	#N/A	#N/A	#N/A	#N/A	#N/A
2018-01-12 10:00:00	2.7	-0.1	-2.6	-0.1	#N/A	5.6	5.6	2.2	6.7	2.2	#N/A	3.3	3.3	1.8	4.5	1.8	#N/A	#N/A	#N/A	#N/A	#N/A	#N/A	#N/A	#N/A
2018-01-12 11:00:00	5.5	-0.1	2.3	-0.1	#N/A	5.6	5.6	2.2	6.7	2.2	#N/A	3.3	3.3	1.8	4.5	1.8	#N/A	#N/A	#N/A	#N/A	#N/A	#N/A	#N/A	#N/A
2018-01-12 12:00:00	6.2	-0.1	6.9	-0.1	#N/A	5.5	5.5	2.2	6.7	2.2	#N/A	3.3	3.3	1.8	4.5	1.8	#N/A	#N/A	#N/A	#N/A	#N/A	#N/A	#N/A	#N/A
2018-01-12 13:00:00	8.7	-0.1	8.4	-0.1	#N/A	5.4	5.4	2.2	6.7	2.2	#N/A	3.2	3.2	1.8	4.5	1.8	#N/A	#N/A	#N/A	#N/A	#N/A	#N/A	#N/A	#N/A
2018-01-12 14:00:00	7.7	-0.1	8.4	-0.1	#N/A	5.5	5.5	2.2	6.7	2.2	#N/A	3.2	3.2	1.8	4.5	1.8	#N/A	#N/A	#N/A	#N/A	#N/A	#N/A	#N/A	#N/A
2018-01-12 15:00:00	5.5	-0.1	6	-0.1	#N/A	6.8	6.8	2.2	6.7	2.2	#N/A	3.3	3.3	1.8	4.5	1.8	#N/A	#N/A	#N/A	#N/A	#N/A	#N/A	#N/A	#N/A
2018-01-12 16:00:00	3.4	-0.1	4.6	-0.1	#N/A	7.4	7.4	2.2	6.7	2.2	#N/A	3.6	3.6	1.8	4.5	1.8	#N/A	#N/A	#N/A	#N/A	#N/A	#N/A	#N/A	#N/A
2018-01-12 17:00:00	0.3	-0.1	1.9	-0.1	#N/A	8.2	8.2	2.2	6.7	2.2	#N/A	5.4	5.4	1.8	4.5	1.8	#N/A	#N/A	#N/A	#N/A	#N/A	#N/A	#N/A	#N/A
2018-01-12 18:00:00	-1	-0.1	0.5	-0.1	#N/A	8.4	8.4	2.2	6.7	2.2	#N/A	7	7	1.8	4.5	1.8	#N/A	#N/A	#N/A	#N/A	#N/A	#N/A	#N/A	#N/A
2018-01-12 19:00:00	-1.6	-0.1	-0.2	-0.1	#N/A	9.1	9.1	2.2	6.7	2.2	#N/A	7.5	7.5	1.8	4.5	1.8	#N/A	#N/A	#N/A	#N/A	#N/A	#N/A	#N/A	#N/A
2018-01-12 20:00:00	-2.1	-0.1	-0.5	-0.1	#N/A	8.8	8.8	2.2	6.7	2.2	#N/A	7.5	7.5	1.8	4.5	1.8	#N/A	#N/A	#N/A	#N/A	#N/A	#N/A	#N/A	#N/A
2018-01-12 21:00:00	-2.5	-0.1	-0.5	-0.1	#N/A	8.1	8.1	2.2	6.7	2.2	#N/A	6.6	6.6	1.8	4.5	1.8	#N/A	#N/A	#N/A	#N/A	#N/A	#N/A	#N/A	#N/A
2018-01-12 22:00:00	-2.6	-0.1	-0.7	-0.1	#N/A	7.5	7.5	2.2	6.7	2.2	#N/A	6.1	6.1	1.8	4.5	1.8	#N/A	#N/A	#N/A	#N/A	#N/A	#N/A	#N/A	#N/A
2018-01-12 23:00:00	-2.9	-0.1	-1.1	-0.1	#N/A	6.5	6.5	2.2	6.7	2.2	#N/A	5.1	5.1	1.8	4.5	1.8	#N/A	#N/A	#N/A	#N/A	#N/A	#N/A	#N/A	#N/A
2018-01-13	-2.7	0	-1	0.9	#N/A	6.1	6.1	2.2	5.7	2.2	#N/A	4.6	4.6	1.8	4.5	1.8	#N/A	#N/A	#N/A	#N/A	#N/A	#N/A	#N/A	#N/A
2018-01-13 01:00:00	-3.1	0	-0.9	0.9	#N/A	5.8	5.8	2.2	5.7	2.2	#N/A	4.3	4.3	1.8	4.5	1.8	#N/A	#N/A	#N/A	#N/A	#N/A	#N/A	#N/A	#N/A
2018-01-13 02:00:00	-3.2	0	-1.5	0.9	#N/A	5.6	5.6	2.2	5.7	2.2	#N/A	4.2	4.2	1.8	4.5	1.8	#N/A	#N/A	#N/A	#N/A	#N/A	#N/A	#N/A	#N/A
2018-01-13 03:00:00	-3.1	0	-1.4	0.9	#N/A	5.4	5.4	2.2	5.7	2.2	#N/A	4.2	4.2	1.8	4.5	1.8	#N/A	#N/A	#N/A	#N/A	#N/A	#N/A	#N/A	#N/A
2018-01-13 04:00:00	-3.6	0	-1.8	0.9	#N/A	5.3	5.3	2.2	5.7	2.2	#N/A	4.1	4.1	1.8	4.5	1.8	#N/A	#N/A	#N/A	#N/A	#N/A	#N/A	#N/A	#N/A
2018-01-13 05:00:00	-3.7	0	-1.2	0.9	#N/A	5.2	5.2	2.2	5.7	2.2	#N/A	3.9	3.9	1.8	4.5	1.8	#N/A	#N/A	#N/A	#N/A	#N/A	#N/A	#N/A	#N/A
2018-01-13 06:00:00	-3.8	0	-1.9	0.9	#N/A	5.2	5.2	2.2	5.7	2.2	#N/A	4	4	1.8	4.5	1.8	#N/A	#N/A	#N/A	#N/A	#N/A	#N/A	#N/A	#N/A
2018-01-13 07:00:00	-4.4	0	-1.9	0.9	#N/A	5	5	2.2	5.7	2.2	#N/A	3.9	3.9	1.8	4.5	1.8	#N/A	#N/A	#N/A	#N/A	#N/A	#N/A	#N/A	#N/A
2018-01-13 08:00:00	-4.4	0	-1.4	0.9	#N/A	4.9	4.9	2.2	5.7	2.2	#N/A	3.7	3.7	1.8	4.5	1.8	#N/A	#N/A	#N/A	#N/A	#N/A	#N/A	#N/A	#N/A
2018-01-13 09:00:00	1.6	0	-1.4	0.9	#N/A	4.9	4.9	2.2	5.7	2.2	#N/A	3.7	3.7	1.8	4.5	1.8	#N/A	#N/A	#N/A	#N/A	#N/A	#N/A	#N/A	#N/A
2018-01-13 10:00:00	3.7	0	-0.6	0.9	#N/A	4.7	4.7	2.2	5.7	2.2	#N/A	3.6	3.6	1.8	4.5	1.8	#N/A	#N/A	#N/A	#N/A	#N/A	#N/A	#N/A	#N/A
2018-01-13 11:00:00	6	0	4.5	0.9	#N/A	4.6	4.6	2.2	5.7	2.2	#N/A	3.8	3.8	1.8	4.5	1.8	#N/A	#N/A	#N/A	#N/A	#N/A	#N/A	#N/A	#N/A
2018-01-13 12:00:00	7.4	0	6.8	0.9	#N/A	4.6	4.6	2.2	5.7	2.2	#N/A	3.5	3.5	1.8	4.5	1.8	#N/A	#N/A	#N/A	#N/A	#N/A	#N/A	#N/A	#N/A
2018-01-13 13:00:00	7.7	0	7.7	0.9	#N/A	4.4	4.4	2.2	5.7	2.2	#N/A	3.5	3.5	1.8	4.5	1.8	#N/A	#N/A	#N/A	#N/A	#N/A	#N/A	#N/A	#N/A
2018-01-13 14:00:00	6.7	0	8.1	0.9	#N/A	4.4	4.4	2.2	5.7	2.2	#N/A	3.6	3.6	1.8	4.5	1.8	#N/A	#N/A	#N/A	#N/A	#N/A	#N/A	#N/A	#N/A
2018-01-13 15:00:00	4.9	0	6.7	0.9	#N/A	6.1	6.1	2.2	5.7	2.2	#N/A	3.6	3.6	1.8	4.5	1.8	#N/A	#N/A	#N/A	#N/A	#N/A	#N/A	#N/A	#N/A
2018-01-13 16:00:00	2.6	0	4.9	0.9	#N/A	6.7	6.7	2.2	5.7	2.2	#N/A	3.9	3.9	1.8	4.5	1.8	#N/A	#N/A	#N/A	#N/A	#N/A	#N/A	#N/A	#N/A
2018-01-13 17:00:00	0.9	0	1.9	0.9	#N/A	7.4	7.4	2.2	5.7	2.2	#N/A	5.7	5.7	1.8	4.5	1.8	#N/A	#N/A	#N/A	#N/A	#N/A	#N/A	#N/A	#N/A
2018-01-13 18:00:00	-0.6	0	0.5	0.9	#N/A	7.7	7.7	2.2	5.7	2.2	#N/A	6.5	6.5	1.8	4.5	1.8	#N/A	#N/A	#N/A	#N/A	#N/A	#N/A	#N/A	#N/A
2018-01-13 19:00:00	-1.2	0	-0.3	0.9	#N/A	7.8	7.8	2.2	5.7	2.2	#N/A	6.8	6.8	1.8	4.5	1.8	#N/A	#N/A	#N/A	#N/A	#N/A	#N/A	#N/A	#N/A
2018-01-13 20:00:00	-2.1	0	-1.2	0.9	#N/A	7.4	7.4	2.2	5.7	2.2	#N/A	6.9	6.9	1.8	4.5	1.8	#N/A	#N/A	#N/A	#N/A	#N/A	#N/A	#N/A	#N/A
2018-01-13 21:00:00	-1.8	0	-1	0.9	#N/A	6.9	6.9	2.2	5.7	2.2	#N/A	6.4	6.4	1.8	4.5	1.8	#N/A	#N/A	#N/A	#N/A	#N/A	#N/A	#N/A	#N/A
2018-01-13 22:00:00	-2	0	-0.6	0.9	#N/A	6.1	6.1	2.2	5.7	2.2	#N/A	5.7	5.7	1.8	4.5	1.8	#N/A	#N/A	#N/A	#N/A	#N/A	#N/A	#N/A	#N/A
2018-01-13 23:00:00	-2.4	0	-1	0.9	#N/A	5.5	5.5	2.2	5.7	2.2	#N/A	4.6	4.6	1.8	4.5	1.8	#N/A	#N/A	#N/A	#N/A	#N/A	#N/A	#N/A	#N/A
2018-01-14	-2.9	0.7	-1.6	0.6	#N/A	5	5	2.2	4.7	2.2	#N/A	4.1	4.1	1.8	3.7	1.8	#N/A	#N/A	#N/A	#N/A	#N/A	#N/A	#N/A	#N/A
2018-01-14 01:00:00	-2.5	0.7	-1.8	0.6	#N/A	4.8	4.8	2.2	4.7	2.2	#N/A	3.8	3.8	1.8	3.7	1.8	#N/A	#N/A	#N/A	#N/A	#N/A	#N/A	#N/A	#N/A
2018-01-14 02:00:00	-2.3	0.7	-1.9	0.6	#N/A	4.4	4.4	2.2	4.7	2.2	#N/A	3.4	3.4	1.8	3.7	1.8	#N/A	#N/A	#N/A	#N/A	#N/A	#N/A	#N/A	#N/A
2018-01-14 03:00:00	-2	0.7	-1.7	0.6	#N/A	4.4	4.4	2.2	4.7	2.2	#N/A	3.5	3.5	1.8	3.7	1.8	#N/A	#N/A	#N/A	#N/A	#N/A	#N/A	#N/A	#N/A
2018-01-14 04:00:00	-1.9	0.7	-1.5	0.6	#N/A	4.3	4.3	2.2	4.7	2.2	#N/A	3.5	3.5	1.8	3.7	1.8	#N/A	#N/A	#N/A	#N/A	#N/A	#N/A	#N/A	#N/A
2018-01-14 05:00:00	-1.8	0.7	-1.1	0.6	#N/A	4.2	4.2	2.2	4.7	2.2	#N/A	3.4	3.4	1.8	3.7	1.8	#N/A	#N/A	#N/A	#N/A	#N/A	#N/A	#N/A	#N/A
2018-01-14 06:00:00	-1.6	0.7	-1.4	0.6	#N/A	3.9	3.9	2.2	4.7	2.2	#N/A	3.1	3.1	1.8	3.7	1.8	#N/A	#N/A	#N/A	#N/A	#N/A	#N/A	#N/A	#N/A
2018-01-14 07:00:00	-1.3	0.7	-0.7	0.6	#N/A	4	4	2.2	4.7	2.2	#N/A	3	3	1.8	3.7	1.8	#N/A	#N/A	#N/A	#N/A	#N/A	#N/A	#N/A	#N/A
2018-01-14 08:00:00	-0.7	0.7	-0.4	0.6	#N/A	4	4	2.2	4.7	2.2	#N/A	2.9	2.9	1.8	3.7	1.8	#N/A	#N/A	#N/A	#N/A	#N/A	#N/A	#N/A	#N/A
2018-01-14 09:00:00	0.5	0.7	0.4	0.6	#N/A	4.1	4.1	2.2	4.7	2.2	#N/A	3	3	1.8	3.7	1.8	#N/A	#N/A	#N/A	#N/A	#N/A	#N/A	#N/A	#N/A
2018-01-14 10:00:00	3.4	0.7	2	0.6	#N/A	4	4	2.2	4.7	2.2	#N/A	3	3	1.8	3.7	1.8	#N/A	#N/A	#N/A	#N/A	#N/A	#N/A	#N/A	#N/A
2018-01-14 11:00:00	3.9	0.7	3.4	0.6	#N/A	4	4	2.2	4.7	2.2	#N/A	3.1	3.1	1.8	3.7	1.8	#N/A	#N/A	#N/A	#N/A	#N/A	#N/A	#N/A	#N/A
2018-01-14 12:00:00	6.1	0.7	3.7	0.6	#N/A	4.1	4.1	2.2	4.7	2.2	#N/A	3	3	1.8	3.7	1.8	#N/A	#N/A	#N/A	#N/A	#N/A	#N/A	#N/A	#N/A
2018-01-14 13:00:00	5.4	0.7	4	0.6	#N/A	4.1	4.1	2.2	4.7	2.2	#N/A	3.2	3.2	1.8	3.7	1.8	#N/A	#N/A	#N/A	#N/A	#N/A	#N/A	#N/A	#N/A
2018-01-14 14:00:00	5.8	0.7	3.9	0.6	#N/A	4.2	4.2	2.2	4.7	2.2	#N/A	3.3	3.3	1.8	3.7	1.8	#N/A	#N/A	#N/A	#N/A	#N/A	#N/A	#N/A	#N/A
2018-01-14 15:00:00	5.4	0.7	3.9	0.6	#N/A	4.5	4.5	2.2	4.7	2.2	#N/A	3.6	3.6	1.8	3.7	1.8	#N/A	#N/A	#N/A	#N/A	#N/A	#N/A	#N/A	#N/A
2018-01-14 16:00:00	4.4	0.7	3.1	0.6	#N/A	5.4	5.4	2.2	4.7	2.2	#N/A	4.1	4.1	1.8	3.7	1.8	#N/A	#N/A	#N/A	#N/A	#N/A	#N/A	#N/A	#N/A
2018-01-14 17:00:00	2.5	0.7	2.1	0.6	#N/A	5.5	5.5	2.2	4.7	2.2	#N/A	4.6	4.6	1.8	3.7	1.8	#N/A	#N/A	#N/A	#N/A	#N/A	#N/A	#N/A	#N/A
2018-01-14 18:00:00	1.7	0.7	1.3	0.6	#N/A	6.1	6.1	2.2	4.7	2.2	#N/A	4.6	4.6	1.8	3.7	1.8	#N/A	#N/A	#N/A	#N/A	#N/A	#N/A	#N/A	#N/A
2018-01-14 19:00:00	0.1	0.7	0.8	0.6	#N/A	5.8	5.8	2.2	4.7	2.2	#N/A	4.7	4.7	1.8	3.7	1.8	#N/A	#N/A	#N/A	#N/A	#N/A	#N/A	#N/A	#N/A
2018-01-14 20:00:00	-1.5	0.7	-0.5	0.6	#N/A	5.9	5.9	2.2	4.7	2.2	#N/A	4.7	4.7	1.8	3.7	1.8	#N/A	#N/A	#N/A	#N/A	#N/A	#N/A	#N/A	#N/A
2018-01-14 21:00:00	-2.1	0.7	-1	0.6	#N/A	5.7	5.7	2.2	4.7	2.2	#N/A	4.6	4.6	1.8	3.7	1.8	#N/A	#N/A	#N/A	#N/A	#N/A	#N/A	#N/A	#N/A
2018-01-14 22:00:00	-1.4	0.7	-0.5	0.6	#N/A	5.4	5.4	2.2	4.7	2.2	#N/A	4.3	4.3	1.8	3.7	1.8	#N/A	#N/A	#N/A	#N/A	#N/A	#N/A	#N/A	#N/A
2018-01-14 23:00:00	-0.8	0.7	0.1	0.6	#N/A	4.7	4.7	2.2	4.7	2.2	#N/A	3.9	3.9	1.8	3.7	1.8	#N/A	#N/A	#N/A	#N/A	#N/A	#N/A	#N/A	#N/A
2018-01-15	-0.5	1.2	0.2	0.8	#N/A	4.4	4.4	2.2	3.6	2.2	#N/A	3.6	3.6	1.8	3.1	1.8	#N/A	#N/A	#N/A	#N/A	#N/A	#N/A	#N/A	#N/A
2018-01-15 01:00:00	-0.6	1.2	-0.7	0.8	#N/A	3.9	3.9	2.2	3.6	2.2	#N/A	3.4	3.4	1.8	3.1	1.8	#N/A	#N/A	#N/A	#N/A	#N/A	#N/A	#N/A	#N/A
2018-01-15 02:00:00	-0.4	1.2	-0.3	0.8	#N/A	3.4	3.4	2.2	3.6	2.2	#N/A	2.9	2.9	1.8	3.1	1.8	#N/A	#N/A	#N/A	#N/A	#N/A	#N/A	#N/A	#N/A
2018-01-15 03:00:00	-1.1	1.2	-1	0.8	#N/A	3.2	3.2	2.2	3.6	2.2	#N/A	2.7	2.7	1.8	3.1	1.8	#N/A	#N/A	#N/A	#N/A	#N/A	#N/A	#N/A	#N/A
2018-01-15 04:00:00	-1.3	1.2	-0.6	0.8	#N/A	3.3	3.3	2.2	3.6	2.2	#N/A	2.9	2.9	1.8	3.1	1.8	#N/A	#N/A	#N/A	#N/A	#N/A	#N/A	#N/A	#N/A
2018-01-15 05:00:00	-2.1	1.2	-1.6	0.8	#N/A	3.4	3.4	2.2	3.6	2.2	#N/A	3	3	1.8	3.1	1.8	#N/A	#N/A	#N/A	#N/A	#N/A	#N/A	#N/A	#N/A
2018-01-15 06:00:00	-2.7	1.2	-1.9	0.8	#N/A	3.4	3.4	2.2	3.6	2.2	#N/A	3	3	1.8	3.1	1.8	#N/A	#N/A	#N/A	#N/A	#N/A	#N/A	#N/A	#N/A
2018-01-15 07:00:00	-3	1.2	-1.8	0.8	#N/A	3.4	3.4	2.2	3.6	2.2	#N/A	2.7	2.7	1.8	3.1	1.8	#N/A	#N/A	#N/A	#N/A	#N/A	#N/A	#N/A	#N/A
2018-01-15 08:00:00	-3.1	1.2	-1.6	0.8	#N/A	3.4	3.4	2.2	3.6	2.2	#N/A	2.8	2.8	1.8	3.1	1.8	#N/A	#N/A	#N/A	#N/A	#N/A	#N/A	#N/A	#N/A
2018-01-15 09:00:00	-0.7	1.2	-1.3	0.8	#N/A	3.1	3.1	2.2	3.6	2.2	#N/A	2.5	2.5	1.8	3.1	1.8	#N/A	#N/A	#N/A	#N/A	#N/A	#N/A	#N/A	#N/A
2018-01-15 10:00:00	0.8	1.2	0.4	0.8	#N/A	3	3	2.2	3.6	2.2	#N/A	2.6	2.6	1.8	3.1	1.8	#N/A	#N/A	#N/A	#N/A	#N/A	#N/A	#N/A	#N/A
2018-01-15 11:00:00	3	1.2	1.8	0.8	#N/A	2.8	2.8	2.2	3.6	2.2	#N/A	2.3	2.3	1.8	3.1	1.8	#N/A	#N/A	#N/A	#N/A	#N/A	#N/A	#N/A	#N/A
2018-01-15 12:00:00	5	1.2	4.3	0.8	#N/A	2.5	2.5	2.2	3.6	2.2	#N/A	2.2	2.2	1.8	3.1	1.8	#N/A	#N/A	#N/A	#N/A	#N/A	#N/A	#N/A	#N/A
2018-01-15 13:00:00	6.2	1.2	4.5	0.8	#N/A	2.5	2.5	2.2	3.6	2.2	#N/A	2.2	2.2	1.8	3.1	1.8	#N/A	#N/A	#N/A	#N/A	#N/A	#N/A	#N/A	#N/A
2018-01-15 14:00:00	5.5	1.2	5	0.8	#N/A	2.4	2.4	2.2	3.6	2.2	#N/A	2.2	2.2	1.8	3.1	1.8	#N/A	#N/A	#N/A	#N/A	#N/A	#N/A	#N/A	#N/A
2018-01-15 15:00:00	5.5	1.2	4.3	0.8	#N/A	3.1	3.1	2.2	3.6	2.2	#N/A	2.3	2.3	1.8	3.1	1.8	#N/A	#N/A	#N/A	#N/A	#N/A	#N/A	#N/A	#N/A
2018-01-15 16:00:00	4.9	1.2	3	0.8	#N/A	3.5	3.5	2.2	3.6	2.2	#N/A	2.9	2.9	1.8	3.1	1.8	#N/A	#N/A	#N/A	#N/A	#N/A	#N/A	#N/A	#N/A
2018-01-15 17:00:00	3.4	1.2	2	0.8	#N/A	4.2	4.2	2.2	3.6	2.2	#N/A	3.5	3.5	1.8	3.1	1.8	#N/A	#N/A	#N/A	#N/A	#N/A	#N/A	#N/A	#N/A
2018-01-15 18:00:00	2.6	1.2	1.7	0.8	#N/A	4.8	4.8	2.2	3.6	2.2	#N/A	4.3	4.3	1.8	3.1	1.8	#N/A	#N/A	#N/A	#N/A	#N/A	#N/A	#N/A	#N/A
2018-01-15 19:00:00	2.3	1.2	1.4	0.8	#N/A	5.1	5.1	2.2	3.6	2.2	#N/A	4.4	4.4	1.8	3.1	1.8	#N/A	#N/A	#N/A	#N/A	#N/A	#N/A	#N/A	#N/A
2018-01-15 20:00:00	2.1	1.2	1.4	0.8	#N/A	4.9	4.9	2.2	3.6	2.2	#N/A	4.6	4.6	1.8	3.1	1.8	#N/A	#N/A	#N/A	#N/A	#N/A	#N/A	#N/A	#N/A
2018-01-15 21:00:00	1.7	1.2	0.7	0.8	#N/A	4.9	4.9	2.2	3.6	2.2	#N/A	4.3	4.3	1.8	3.1	1.8	#N/A	#N/A	#N/A	#N/A	#N/A	#N/A	#N/A	#N/A
2018-01-15 22:00:00	0.1	1.2	0.1	0.8	#N/A	4.6	4.6	2.2	3.6	2.2	#N/A	3.8	3.8	1.8	3.1	1.8	#N/A	#N/A	#N/A	#N/A	#N/A	#N/A	#N/A	#N/A
2018-01-15 23:00:00	0.2	1.2	-0.1	0.8	#N/A	4.2	4.2	2.2	3.6	2.2	#N/A	3.4	3.4	1.8	3.1	1.8	#N/A	#N/A	#N/A	#N/A	#N/A	#N/A	#N/A	#N/A
2018-01-16	0.2	3.5	-0.1	2.7	#N/A	3.9	3.9	2.2	3.8	2.2	#N/A	3.3	3.3	1.8	3.3	1.8	#N/A	#N/A	#N/A	#N/A	#N/A	#N/A	#N/A	#N/A
2018-01-16 01:00:00	0.2	3.5	-0.1	2.7	#N/A	3.8	3.8	2.2	3.8	2.2	#N/A	3.2	3.2	1.8	3.3	1.8	#N/A	#N/A	#N/A	#N/A	#N/A	#N/A	#N/A	#N/A
2018-01-16 02:00:00	0.1	3.5	-0.1	2.7	#N/A	3.7	3.7	2.2	3.8	2.2	#N/A	3.2	3.2	1.8	3.3	1.8	#N/A	#N/A	#N/A	#N/A	#N/A	#N/A	#N/A	#N/A
2018-01-16 03:00:00	0.1	3.5	-0.2	2.7	#N/A	3.5	3.5	2.2	3.8	2.2	#N/A	2.9	2.9	1.8	3.3	1.8	#N/A	#N/A	#N/A	#N/A	#N/A	#N/A	#N/A	#N/A
2018-01-16 04:00:00	0.2	3.5	-0.2	2.7	#N/A	3.1	3.1	2.2	3.8	2.2	#N/A	2.7	2.7	1.8	3.3	1.8	#N/A	#N/A	#N/A	#N/A	#N/A	#N/A	#N/A	#N/A
2018-01-16 05:00:00	0.3	3.5	-0.2	2.7	#N/A	3.1	3.1	2.2	3.8	2.2	#N/A	2.6	2.6	1.8	3.3	1.8	#N/A	#N/A	#N/A	#N/A	#N/A	#N/A	#N/A	#N/A
2018-01-16 06:00:00	0.2	3.5	-0.3	2.7	#N/A	3	3	2.2	3.8	2.2	#N/A	2.6	2.6	1.8	3.3	1.8	#N/A	#N/A	#N/A	#N/A	#N/A	#N/A	#N/A	#N/A
2018-01-16 07:00:00	0.2	3.5	-0.3	2.7	#N/A	3	3	2.2	3.8	2.2	#N/A	2.6	2.6	1.8	3.3	1.8	#N/A	#N/A	#N/A	#N/A	#N/A	#N/A	#N/A	#N/A
2018-01-16 08:00:00	0	3.5	-0.1	2.7	#N/A	3	3	2.2	3.8	2.2	#N/A	2.6	2.6	1.8	3.3	1.8	#N/A	#N/A	#N/A	#N/A	#N/A	#N/A	#N/A	#N/A
2018-01-16 09:00:00	1.5	3.5	0.2	2.7	#N/A	3	3	2.2	3.8	2.2	#N/A	2.5	2.5	1.8	3.3	1.8	#N/A	#N/A	#N/A	#N/A	#N/A	#N/A	#N/A	#N/A
2018-01-16 10:00:00	2.7	3.5	1.8	2.7	#N/A	3	3	2.2	3.8	2.2	#N/A	2.5	2.5	1.8	3.3	1.8	#N/A	#N/A	#N/A	#N/A	#N/A	#N/A	#N/A	#N/A
2018-01-16 11:00:00	4.2	3.5	3.2	2.7	#N/A	3	3	2.2	3.8	2.2	#N/A	2.5	2.5	1.8	3.3	1.8	#N/A	#N/A	#N/A	#N/A	#N/A	#N/A	#N/A	#N/A
2018-01-16 12:00:00	6.5	3.5	4.5	2.7	#N/A	3	3	2.2	3.8	2.2	#N/A	2.5	2.5	1.8	3.3	1.8	#N/A	#N/A	#N/A	#N/A	#N/A	#N/A	#N/A	#N/A
2018-01-16 13:00:00	7.3	3.5	5.1	2.7	#N/A	3	3	2.2	3.8	2.2	#N/A	2.5	2.5	1.8	3.3	1.8	#N/A	#N/A	#N/A	#N/A	#N/A	#N/A	#N/A	#N/A
2018-01-16 14:00:00	8.5	3.5	6.1	2.7	#N/A	3	3	2.2	3.8	2.2	#N/A	2.6	2.6	1.8	3.3	1.8	#N/A	#N/A	#N/A	#N/A	#N/A	#N/A	#N/A	#N/A
2018-01-16 15:00:00	9.2	3.5	6.5	2.7	#N/A	3.4	3.4	2.2	3.8	2.2	#N/A	2.7	2.7	1.8	3.3	1.8	#N/A	#N/A	#N/A	#N/A	#N/A	#N/A	#N/A	#N/A
2018-01-16 16:00:00	9	3.5	7	2.7	#N/A	3.8	3.8	2.2	3.8	2.2	#N/A	3.3	3.3	1.8	3.3	1.8	#N/A	#N/A	#N/A	#N/A	#N/A	#N/A	#N/A	#N/A
2018-01-16 17:00:00	5.5	3.5	6	2.7	#N/A	4.3	4.3	2.2	3.8	2.2	#N/A	3.8	3.8	1.8	3.3	1.8	#N/A	#N/A	#N/A	#N/A	#N/A	#N/A	#N/A	#N/A
2018-01-16 18:00:00	5	3.5	4.8	2.7	#N/A	5	5	2.2	3.8	2.2	#N/A	4.3	4.3	1.8	3.3	1.8	#N/A	#N/A	#N/A	#N/A	#N/A	#N/A	#N/A	#N/A
2018-01-16 19:00:00	4.3	3.5	4.2	2.7	#N/A	5.2	5.2	2.2	3.8	2.2	#N/A	4.6	4.6	1.8	3.3	1.8	#N/A	#N/A	#N/A	#N/A	#N/A	#N/A	#N/A	#N/A
2018-01-16 20:00:00	4.5	3.5	4.1	2.7	#N/A	5.6	5.6	2.2	3.8	2.2	#N/A	4.9	4.9	1.8	3.3	1.8	#N/A	#N/A	#N/A	#N/A	#N/A	#N/A	#N/A	#N/A
2018-01-16 21:00:00	4.4	3.5	3.9	2.7	#N/A	5.9	5.9	2.2	3.8	2.2	#N/A	5.1	5.1	1.8	3.3	1.8	#N/A	#N/A	#N/A	#N/A	#N/A	#N/A	#N/A	#N/A
2018-01-16 22:00:00	4.6	3.5	4	2.7	#N/A	5.8	5.8	2.2	3.8	2.2	#N/A	5.3	5.3	1.8	3.3	1.8	#N/A	#N/A	#N/A	#N/A	#N/A	#N/A	#N/A	#N/A
2018-01-16 23:00:00	6.2	3.5	4.4	2.7	#N/A	4.8	4.8	2.2	3.8	2.2	#N/A	5	5	1.8	3.3	1.8	#N/A	#N/A	#N/A	#N/A	#N/A	#N/A	#N/A	#N/A
2018-01-17	6.4	3.7	4.5	1.2	#N/A	4.7	4.7	2.2	4.7	2.2	#N/A	4.5	4.5	1.8	3.8	1.8	#N/A	#N/A	#N/A	#N/A	#N/A	#N/A	#N/A	#N/A
2018-01-17 01:00:00	6	3.7	4.2	1.2	#N/A	4.5	4.5	2.2	4.7	2.2	#N/A	4.3	4.3	1.8	3.8	1.8	#N/A	#N/A	#N/A	#N/A	#N/A	#N/A	#N/A	#N/A
2018-01-17 02:00:00	5.7	3.7	4	1.2	#N/A	4.6	4.6	2.2	4.7	2.2	#N/A	4.3	4.3	1.8	3.8	1.8	#N/A	#N/A	#N/A	#N/A	#N/A	#N/A	#N/A	#N/A
2018-01-17 03:00:00	5	3.7	3.4	1.2	#N/A	4.6	4.6	2.2	4.7	2.2	#N/A	4.3	4.3	1.8	3.8	1.8	#N/A	#N/A	#N/A	#N/A	#N/A	#N/A	#N/A	#N/A
2018-01-17 04:00:00	4.8	3.7	2.5	1.2	#N/A	4.7	4.7	2.2	4.7	2.2	#N/A	4.3	4.3	1.8	3.8	1.8	#N/A	#N/A	#N/A	#N/A	#N/A	#N/A	#N/A	#N/A
2018-01-17 05:00:00	5.4	3.7	1.9	1.2	#N/A	5.2	5.2	2.2	4.7	2.2	#N/A	4.4	4.4	1.8	3.8	1.8	#N/A	#N/A	#N/A	#N/A	#N/A	#N/A	#N/A	#N/A
2018-01-17 06:00:00	3.7	3.7	1.7	1.2	#N/A	5.2	5.2	2.2	4.7	2.2	#N/A	4.5	4.5	1.8	3.8	1.8	#N/A	#N/A	#N/A	#N/A	#N/A	#N/A	#N/A	#N/A
2018-01-17 07:00:00	4.5	3.7	0.9	1.2	#N/A	5.2	5.2	2.2	4.7	2.2	#N/A	4.4	4.4	1.8	3.8	1.8	#N/A	#N/A	#N/A	#N/A	#N/A	#N/A	#N/A	#N/A
2018-01-17 08:00:00	4.1	3.7	0.8	1.2	#N/A	5.1	5.1	2.2	4.7	2.2	#N/A	4.3	4.3	1.8	3.8	1.8	#N/A	#N/A	#N/A	#N/A	#N/A	#N/A	#N/A	#N/A
2018-01-17 09:00:00	4	3.7	0.9	1.2	#N/A	4.9	4.9	2.2	4.7	2.2	#N/A	4.1	4.1	1.8	3.8	1.8	#N/A	#N/A	#N/A	#N/A	#N/A	#N/A	#N/A	#N/A
2018-01-17 10:00:00	4.3	3.7	1.1	1.2	#N/A	4.8	4.8	2.2	4.7	2.2	#N/A	3.8	3.8	1.8	3.8	1.8	#N/A	#N/A	#N/A	#N/A	#N/A	#N/A	#N/A	#N/A
2018-01-17 11:00:00	3.8	3.7	1.9	1.2	#N/A	5	5	2.2	4.7	2.2	#N/A	3.6	3.6	1.8	3.8	1.8	#N/A	#N/A	#N/A	#N/A	#N/A	#N/A	#N/A	#N/A
2018-01-17 12:00:00	3.8	3.7	2.3	1.2	#N/A	4.5	4.5	2.2	4.7	2.2	#N/A	3.5	3.5	1.8	3.8	1.8	#N/A	#N/A	#N/A	#N/A	#N/A	#N/A	#N/A	#N/A
2018-01-17 13:00:00	3.7	3.7	2.4	1.2	#N/A	4.7	4.7	2.2	4.7	2.2	#N/A	3.2	3.2	1.8	3.8	1.8	#N/A	#N/A	#N/A	#N/A	#N/A	#N/A	#N/A	#N/A
2018-01-17 14:00:00	3.9	3.7	2.5	1.2	#N/A	4.6	4.6	2.2	4.7	2.2	#N/A	3.1	3.1	1.8	3.8	1.8	#N/A	#N/A	#N/A	#N/A	#N/A	#N/A	#N/A	#N/A
2018-01-17 15:00:00	3.1	3.7	1.5	1.2	#N/A	4.6	4.6	2.2	4.7	2.2	#N/A	3.2	3.2	1.8	3.8	1.8	#N/A	#N/A	#N/A	#N/A	#N/A	#N/A	#N/A	#N/A
2018-01-17 16:00:00	2.8	3.7	0.7	1.2	#N/A	4.7	4.7	2.2	4.7	2.2	#N/A	3.2	3.2	1.8	3.8	1.8	#N/A	#N/A	#N/A	#N/A	#N/A	#N/A	#N/A	#N/A
2018-01-17 17:00:00	2.7	3.7	-0.2	1.2	#N/A	4.5	4.5	2.2	4.7	2.2	#N/A	3.5	3.5	1.8	3.8	1.8	#N/A	#N/A	#N/A	#N/A	#N/A	#N/A	#N/A	#N/A
2018-01-17 18:00:00	2.4	3.7	-0.7	1.2	#N/A	4.5	4.5	2.2	4.7	2.2	#N/A	3.7	3.7	1.8	3.8	1.8	#N/A	#N/A	#N/A	#N/A	#N/A	#N/A	#N/A	#N/A
2018-01-17 19:00:00	2.3	3.7	-0.7	1.2	#N/A	4.5	4.5	2.2	4.7	2.2	#N/A	3.7	3.7	1.8	3.8	1.8	#N/A	#N/A	#N/A	#N/A	#N/A	#N/A	#N/A	#N/A
2018-01-17 20:00:00	0.9	3.7	-0.4	1.2	#N/A	4.5	4.5	2.2	4.7	2.2	#N/A	3.7	3.7	1.8	3.8	1.8	#N/A	#N/A	#N/A	#N/A	#N/A	#N/A	#N/A	#N/A
2018-01-17 21:00:00	1.4	3.7	-0.7	1.2	#N/A	4.3	4.3	2.2	4.7	2.2	#N/A	3.4	3.4	1.8	3.8	1.8	#N/A	#N/A	#N/A	#N/A	#N/A	#N/A	#N/A	#N/A
2018-01-17 22:00:00	2	3.7	-2.1	1.2	#N/A	4.2	4.2	2.2	4.7	2.2	#N/A	3	3	1.8	3.8	1.8	#N/A	#N/A	#N/A	#N/A	#N/A	#N/A	#N/A	#N/A
2018-01-17 23:00:00	1.2	3.7	-3	1.2	#N/A	4.2	4.2	2.2	4.7	2.2	#N/A	2.7	2.7	1.8	3.8	1.8	#N/A	#N/A	#N/A	#N/A	#N/A	#N/A	#N/A	#N/A
2018-01-18	1.5	1.9	-3.7	1.1	#N/A	4.1	4.1	2.2	4.2	2.2	#N/A	2.5	2.5	1.8	3	1.8	#N/A	#N/A	#N/A	#N/A	#N/A	#N/A	#N/A	#N/A
2018-01-18 01:00:00	1.3	1.9	-3.5	1.1	#N/A	4.1	4.1	2.2	4.2	2.2	#N/A	2.5	2.5	1.8	3	1.8	#N/A	#N/A	#N/A	#N/A	#N/A	#N/A	#N/A	#N/A
2018-01-18 02:00:00	0.6	1.9	-3	1.1	#N/A	3.7	3.7	2.2	4.2	2.2	#N/A	2.6	2.6	1.8	3	1.8	#N/A	#N/A	#N/A	#N/A	#N/A	#N/A	#N/A	#N/A
2018-01-18 03:00:00	-2.6	1.9	-4	1.1	#N/A	3.9	3.9	2.2	4.2	2.2	#N/A	2.5	2.5	1.8	3	1.8	#N/A	#N/A	#N/A	#N/A	#N/A	#N/A	#N/A	#N/A
2018-01-18 04:00:00	-3	1.9	-4.4	1.1	#N/A	4	4	2.2	4.2	2.2	#N/A	2	2	1.8	3	1.8	#N/A	#N/A	#N/A	#N/A	#N/A	#N/A	#N/A	#N/A
2018-01-18 05:00:00	-3.6	1.9	-4.1	1.1	#N/A	3.8	3.8	2.2	4.2	2.2	#N/A	1.7	1.7	1.8	3	1.8	#N/A	#N/A	#N/A	#N/A	#N/A	#N/A	#N/A	#N/A
2018-01-18 06:00:00	-4.1	1.9	-4.2	1.1	#N/A	3.8	3.8	2.2	4.2	2.2	#N/A	1.4	1.4	1.8	3	1.8	#N/A	#N/A	#N/A	#N/A	#N/A	#N/A	#N/A	#N/A
2018-01-18 07:00:00	-3.2	1.9	-4.4	1.1	#N/A	3.8	3.8	2.2	4.2	2.2	#N/A	1.4	1.4	1.8	3	1.8	#N/A	#N/A	#N/A	#N/A	#N/A	#N/A	#N/A	#N/A
2018-01-18 08:00:00	-2.3	1.9	-3.5	1.1	#N/A	3.6	3.6	2.2	4.2	2.2	#N/A	1.6	1.6	1.8	3	1.8	#N/A	#N/A	#N/A	#N/A	#N/A	#N/A	#N/A	#N/A
2018-01-18 09:00:00	1.1	1.9	-0.8	1.1	#N/A	2.6	2.6	2.2	4.2	2.2	#N/A	1.3	1.3	1.8	3	1.8	#N/A	#N/A	#N/A	#N/A	#N/A	#N/A	#N/A	#N/A
2018-01-18 10:00:00	5.6	1.9	1.4	1.1	#N/A	2.5	2.5	2.2	4.2	2.2	#N/A	1.1	1.1	1.8	3	1.8	#N/A	#N/A	#N/A	#N/A	#N/A	#N/A	#N/A	#N/A
2018-01-18 11:00:00	7.2	1.9	4.9	1.1	#N/A	2.3	2.3	2.2	4.2	2.2	#N/A	1.3	1.3	1.8	3	1.8	#N/A	#N/A	#N/A	#N/A	#N/A	#N/A	#N/A	#N/A
2018-01-18 12:00:00	8.3	1.9	7.2	1.1	#N/A	2.2	2.2	2.2	4.2	2.2	#N/A	1.2	1.2	1.8	3	1.8	#N/A	#N/A	#N/A	#N/A	#N/A	#N/A	#N/A	#N/A
2018-01-18 13:00:00	9.8	1.9	8.9	1.1	#N/A	2.5	2.5	2.2	4.2	2.2	#N/A	1.2	1.2	1.8	3	1.8	#N/A	#N/A	#N/A	#N/A	#N/A	#N/A	#N/A	#N/A
2018-01-18 14:00:00	9.8	1.9	10.2	1.1	#N/A	2.8	2.8	2.2	4.2	2.2	#N/A	1.6	1.6	1.8	3	1.8	#N/A	#N/A	#N/A	#N/A	#N/A	#N/A	#N/A	#N/A
2018-01-18 15:00:00	9.7	1.9	8.8	1.1	#N/A	3.8	3.8	2.2	4.2	2.2	#N/A	2.5	2.5	1.8	3	1.8	#N/A	#N/A	#N/A	#N/A	#N/A	#N/A	#N/A	#N/A
2018-01-18 16:00:00	7	1.9	7.5	1.1	#N/A	5.2	5.2	2.2	4.2	2.2	#N/A	3.3	3.3	1.8	3	1.8	#N/A	#N/A	#N/A	#N/A	#N/A	#N/A	#N/A	#N/A
2018-01-18 17:00:00	1.9	1.9	4.7	1.1	#N/A	5.7	5.7	2.2	4.2	2.2	#N/A	4.6	4.6	1.8	3	1.8	#N/A	#N/A	#N/A	#N/A	#N/A	#N/A	#N/A	#N/A
2018-01-18 18:00:00	1	1.9	2.4	1.1	#N/A	6	6	2.2	4.2	2.2	#N/A	5.5	5.5	1.8	3	1.8	#N/A	#N/A	#N/A	#N/A	#N/A	#N/A	#N/A	#N/A
2018-01-18 19:00:00	1	1.9	2.4	1.1	#N/A	6.5	6.5	2.2	4.2	2.2	#N/A	6.1	6.1	1.8	3	1.8	#N/A	#N/A	#N/A	#N/A	#N/A	#N/A	#N/A	#N/A
2018-01-18 20:00:00	0.1	1.9	1.9	1.1	#N/A	6.5	6.5	2.2	4.2	2.2	#N/A	6.6	6.6	1.8	3	1.8	#N/A	#N/A	#N/A	#N/A	#N/A	#N/A	#N/A	#N/A
2018-01-18 21:00:00	-0.4	1.9	0.7	1.1	#N/A	6.5	6.5	2.2	4.2	2.2	#N/A	6.1	6.1	1.8	3	1.8	#N/A	#N/A	#N/A	#N/A	#N/A	#N/A	#N/A	#N/A
2018-01-18 22:00:00	-0.8	1.9	-0.1	1.1	#N/A	5.7	5.7	2.2	4.2	2.2	#N/A	5.6	5.6	1.8	3	1.8	#N/A	#N/A	#N/A	#N/A	#N/A	#N/A	#N/A	#N/A
2018-01-18 23:00:00	-1.1	1.9	0.2	1.1	#N/A	4.2	4.2	2.2	4.2	2.2	#N/A	4.6	4.6	1.8	3	1.8	#N/A	#N/A	#N/A	#N/A	#N/A	#N/A	#N/A	#N/A
2018-01-19	-1	1.4	0	2.7	#N/A	3.9	3.9	2.2	4.3	2.2	#N/A	3.8	3.8	1.8	4.3	1.8	#N/A	#N/A	#N/A	#N/A	#N/A	#N/A	#N/A	#N/A
2018-01-19 01:00:00	-0.6	1.4	0.2	2.7	#N/A	3.9	3.9	2.2	4.3	2.2	#N/A	3.8	3.8	1.8	4.3	1.8	#N/A	#N/A	#N/A	#N/A	#N/A	#N/A	#N/A	#N/A
2018-01-19 02:00:00	-1.1	1.4	0.1	2.7	#N/A	3.7	3.7	2.2	4.3	2.2	#N/A	3.7	3.7	1.8	4.3	1.8	#N/A	#N/A	#N/A	#N/A	#N/A	#N/A	#N/A	#N/A
2018-01-19 03:00:00	-1.1	1.4	0.4	2.7	#N/A	3.5	3.5	2.2	4.3	2.2	#N/A	3.2	3.2	1.8	4.3	1.8	#N/A	#N/A	#N/A	#N/A	#N/A	#N/A	#N/A	#N/A
2018-01-19 04:00:00	-1.7	1.4	1	2.7	#N/A	3.4	3.4	2.2	4.3	2.2	#N/A	3	3	1.8	4.3	1.8	#N/A	#N/A	#N/A	#N/A	#N/A	#N/A	#N/A	#N/A
2018-01-19 05:00:00	-1.6	1.4	1	2.7	#N/A	3.3	3.3	2.2	4.3	2.2	#N/A	3.1	3.1	1.8	4.3	1.8	#N/A	#N/A	#N/A	#N/A	#N/A	#N/A	#N/A	#N/A
2018-01-19 06:00:00	-1.6	1.4	1.2	2.7	#N/A	3.4	3.4	2.2	4.3	2.2	#N/A	3	3	1.8	4.3	1.8	#N/A	#N/A	#N/A	#N/A	#N/A	#N/A	#N/A	#N/A
2018-01-19 07:00:00	-1.9	1.4	2.2	2.7	#N/A	3.5	3.5	2.2	4.3	2.2	#N/A	3.2	3.2	1.8	4.3	1.8	#N/A	#N/A	#N/A	#N/A	#N/A	#N/A	#N/A	#N/A
2018-01-19 08:00:00	-1.7	1.4	1.7	2.7	#N/A	3.4	3.4	2.2	4.3	2.2	#N/A	3.1	3.1	1.8	4.3	1.8	#N/A	#N/A	#N/A	#N/A	#N/A	#N/A	#N/A	#N/A
2018-01-19 09:00:00	-1.1	1.4	2	2.7	#N/A	3.4	3.4	2.2	4.3	2.2	#N/A	3.3	3.3	1.8	4.3	1.8	#N/A	#N/A	#N/A	#N/A	#N/A	#N/A	#N/A	#N/A
2018-01-19 10:00:00	0.8	1.4	2.2	2.7	#N/A	3.2	3.2	2.2	4.3	2.2	#N/A	3.5	3.5	1.8	4.3	1.8	#N/A	#N/A	#N/A	#N/A	#N/A	#N/A	#N/A	#N/A
2018-01-19 11:00:00	6.2	1.4	6.6	2.7	#N/A	3.2	3.2	2.2	4.3	2.2	#N/A	3.5	3.5	1.8	4.3	1.8	#N/A	#N/A	#N/A	#N/A	#N/A	#N/A	#N/A	#N/A
2018-01-19 12:00:00	9.8	1.4	9.7	2.7	#N/A	3.2	3.2	2.2	4.3	2.2	#N/A	3.6	3.6	1.8	4.3	1.8	#N/A	#N/A	#N/A	#N/A	#N/A	#N/A	#N/A	#N/A
2018-01-19 13:00:00	9.8	1.4	10.7	2.7	#N/A	3.2	3.2	2.2	4.3	2.2	#N/A	4	4	1.8	4.3	1.8	#N/A	#N/A	#N/A	#N/A	#N/A	#N/A	#N/A	#N/A
2018-01-19 14:00:00	9.8	1.4	9.9	2.7	#N/A	3.2	3.2	2.2	4.3	2.2	#N/A	3.8	3.8	1.8	4.3	1.8	#N/A	#N/A	#N/A	#N/A	#N/A	#N/A	#N/A	#N/A
2018-01-19 15:00:00	8.8	1.4	8.3	2.7	#N/A	3.4	3.4	2.2	4.3	2.2	#N/A	3.9	3.9	1.8	4.3	1.8	#N/A	#N/A	#N/A	#N/A	#N/A	#N/A	#N/A	#N/A
2018-01-19 16:00:00	7	1.4	6.8	2.7	#N/A	4	4	2.2	4.3	2.2	#N/A	4	4	1.8	4.3	1.8	#N/A	#N/A	#N/A	#N/A	#N/A	#N/A	#N/A	#N/A
2018-01-19 17:00:00	5.1	1.4	3.3	2.7	#N/A	5.6	5.6	2.2	4.3	2.2	#N/A	5.6	5.6	1.8	4.3	1.8	#N/A	#N/A	#N/A	#N/A	#N/A	#N/A	#N/A	#N/A
2018-01-19 18:00:00	0.9	1.4	0.7	2.7	#N/A	6.7	6.7	2.2	4.3	2.2	#N/A	6.7	6.7	1.8	4.3	1.8	#N/A	#N/A	#N/A	#N/A	#N/A	#N/A	#N/A	#N/A
2018-01-19 19:00:00	-1.2	1.4	-1	2.7	#N/A	6.7	6.7	2.2	4.3	2.2	#N/A	7.1	7.1	1.8	4.3	1.8	#N/A	#N/A	#N/A	#N/A	#N/A	#N/A	#N/A	#N/A
2018-01-19 20:00:00	-1.8	1.4	-0.9	2.7	#N/A	6.7	6.7	2.2	4.3	2.2	#N/A	6.8	6.8	1.8	4.3	1.8	#N/A	#N/A	#N/A	#N/A	#N/A	#N/A	#N/A	#N/A
2018-01-19 21:00:00	-2.6	1.4	-0.8	2.7	#N/A	6.4	6.4	2.2	4.3	2.2	#N/A	6.2	6.2	1.8	4.3	1.8	#N/A	#N/A	#N/A	#N/A	#N/A	#N/A	#N/A	#N/A
2018-01-19 22:00:00	-2.8	1.4	-0.3	2.7	#N/A	5.9	5.9	2.2	4.3	2.2	#N/A	5.7	5.7	1.8	4.3	1.8	#N/A	#N/A	#N/A	#N/A	#N/A	#N/A	#N/A	#N/A
2018-01-19 23:00:00	-2.7	1.4	-0.5	2.7	#N/A	5.3	5.3	2.2	4.3	2.2	#N/A	4.4	4.4	1.8	4.3	1.8	#N/A	#N/A	#N/A	#N/A	#N/A	#N/A	#N/A	#N/A
2018-01-20	-2.6	0.8	-0.7	-1	#N/A	4.1	4.1	2.2	4	2.2	#N/A	3.5	3.5	1.8	2.7	1.8	#N/A	#N/A	#N/A	#N/A	#N/A	#N/A	#N/A	#N/A
2018-01-20 01:00:00	-2.9	0.8	-1.9	-1	#N/A	3.4	3.4	2.2	4	2.2	#N/A	2.9	2.9	1.8	2.7	1.8	#N/A	#N/A	#N/A	#N/A	#N/A	#N/A	#N/A	#N/A
2018-01-20 02:00:00	0.2	0.8	-2.5	-1	#N/A	3.3	3.3	2.2	4	2.2	#N/A	2.9	2.9	1.8	2.7	1.8	#N/A	#N/A	#N/A	#N/A	#N/A	#N/A	#N/A	#N/A
2018-01-20 03:00:00	2.1	0.8	-3	-1	#N/A	3.1	3.1	2.2	4	2.2	#N/A	2.9	2.9	1.8	2.7	1.8	#N/A	#N/A	#N/A	#N/A	#N/A	#N/A	#N/A	#N/A
2018-01-20 04:00:00	1.5	0.8	-2.7	-1	#N/A	3	3	2.2	4	2.2	#N/A	3.1	3.1	1.8	2.7	1.8	#N/A	#N/A	#N/A	#N/A	#N/A	#N/A	#N/A	#N/A
2018-01-20 05:00:00	1.3	0.8	-3.4	-1	#N/A	3.1	3.1	2.2	4	2.2	#N/A	3	3	1.8	2.7	1.8	#N/A	#N/A	#N/A	#N/A	#N/A	#N/A	#N/A	#N/A
2018-01-20 06:00:00	1.4	0.8	-3.8	-1	#N/A	3.2	3.2	2.2	4	2.2	#N/A	2.9	2.9	1.8	2.7	1.8	#N/A	#N/A	#N/A	#N/A	#N/A	#N/A	#N/A	#N/A
2018-01-20 07:00:00	1.7	0.8	-3.1	-1	#N/A	3.1	3.1	2.2	4	2.2	#N/A	2.5	2.5	1.8	2.7	1.8	#N/A	#N/A	#N/A	#N/A	#N/A	#N/A	#N/A	#N/A
2018-01-20 08:00:00	-0.6	0.8	-2.7	-1	#N/A	4	4	2.2	4	2.2	#N/A	2.3	2.3	1.8	2.7	1.8	#N/A	#N/A	#N/A	#N/A	#N/A	#N/A	#N/A	#N/A
2018-01-20 09:00:00	2.3	0.8	-1.8	-1	#N/A	4.6	4.6	2.2	4	2.2	#N/A	2.1	2.1	1.8	2.7	1.8	#N/A	#N/A	#N/A	#N/A	#N/A	#N/A	#N/A	#N/A
2018-01-20 10:00:00	2.7	0.8	-0.1	-1	#N/A	4.4	4.4	2.2	4	2.2	#N/A	2.2	2.2	1.8	2.7	1.8	#N/A	#N/A	#N/A	#N/A	#N/A	#N/A	#N/A	#N/A
2018-01-20 11:00:00	3.4	0.8	1.9	-1	#N/A	4.3	4.3	2.2	4	2.2	#N/A	1.9	1.9	1.8	2.7	1.8	#N/A	#N/A	#N/A	#N/A	#N/A	#N/A	#N/A	#N/A
2018-01-20 12:00:00	4.8	0.8	2.2	-1	#N/A	4.4	4.4	2.2	4	2.2	#N/A	1.8	1.8	1.8	2.7	1.8	#N/A	#N/A	#N/A	#N/A	#N/A	#N/A	#N/A	#N/A
2018-01-20 13:00:00	3.2	0.8	2.2	-1	#N/A	4.4	4.4	2.2	4	2.2	#N/A	2	2	1.8	2.7	1.8	#N/A	#N/A	#N/A	#N/A	#N/A	#N/A	#N/A	#N/A
2018-01-20 14:00:00	0.3	0.8	-0.1	-1	#N/A	3.7	3.7	2.2	4	2.2	#N/A	2.1	2.1	1.8	2.7	1.8	#N/A	#N/A	#N/A	#N/A	#N/A	#N/A	#N/A	#N/A
2018-01-20 15:00:00	-0.2	0.8	-0.9	-1	#N/A	4.5	4.5	2.2	4	2.2	#N/A	2.4	2.4	1.8	2.7	1.8	#N/A	#N/A	#N/A	#N/A	#N/A	#N/A	#N/A	#N/A
2018-01-20 16:00:00	0	0.8	-0.9	-1	#N/A	4.6	4.6	2.2	4	2.2	#N/A	3	3	1.8	2.7	1.8	#N/A	#N/A	#N/A	#N/A	#N/A	#N/A	#N/A	#N/A
2018-01-20 17:00:00	-0.1	0.8	-0.8	-1	#N/A	4.9	4.9	2.2	4	2.2	#N/A	3.7	3.7	1.8	2.7	1.8	#N/A	#N/A	#N/A	#N/A	#N/A	#N/A	#N/A	#N/A
2018-01-20 18:00:00	-0.1	0.8	-0.8	-1	#N/A	5.3	5.3	2.2	4	2.2	#N/A	3.8	3.8	1.8	2.7	1.8	#N/A	#N/A	#N/A	#N/A	#N/A	#N/A	#N/A	#N/A
2018-01-20 19:00:00	0	0.8	-0.6	-1	#N/A	4.8	4.8	2.2	4	2.2	#N/A	3.8	3.8	1.8	2.7	1.8	#N/A	#N/A	#N/A	#N/A	#N/A	#N/A	#N/A	#N/A
2018-01-20 20:00:00	0	0.8	-0.3	-1	#N/A	3.9	3.9	2.2	4	2.2	#N/A	3	3	1.8	2.7	1.8	#N/A	#N/A	#N/A	#N/A	#N/A	#N/A	#N/A	#N/A
2018-01-20 21:00:00	0	0.8	-0.1	-1	#N/A	3.8	3.8	2.2	4	2.2	#N/A	2.7	2.7	1.8	2.7	1.8	#N/A	#N/A	#N/A	#N/A	#N/A	#N/A	#N/A	#N/A
2018-01-20 22:00:00	0.1	0.8	0.1	-1	#N/A	3.9	3.9	2.2	4	2.2	#N/A	2.7	2.7	1.8	2.7	1.8	#N/A	#N/A	#N/A	#N/A	#N/A	#N/A	#N/A	#N/A
2018-01-20 23:00:00	0.1	0.8	0.3	-1	#N/A	3.9	3.9	2.2	4	2.2	#N/A	2.7	2.7	1.8	2.7	1.8	#N/A	#N/A	#N/A	#N/A	#N/A	#N/A	#N/A	#N/A
2018-01-21	0.1	7.1	0.8	6.2	#N/A	3.9	3.9	2.2	5.7	2.2	#N/A	2.7	2.7	1.8	4.7	1.8	#N/A	#N/A	#N/A	#N/A	#N/A	#N/A	#N/A	#N/A
2018-01-21 01:00:00	0.1	7.1	1.5	6.2	#N/A	3.9	3.9	2.2	5.7	2.2	#N/A	2.8	2.8	1.8	4.7	1.8	#N/A	#N/A	#N/A	#N/A	#N/A	#N/A	#N/A	#N/A
2018-01-21 02:00:00	0.3	7.1	1.8	6.2	#N/A	3.9	3.9	2.2	5.7	2.2	#N/A	3	3	1.8	4.7	1.8	#N/A	#N/A	#N/A	#N/A	#N/A	#N/A	#N/A	#N/A
2018-01-21 03:00:00	0.3	7.1	1.7	6.2	#N/A	3.9	3.9	2.2	5.7	2.2	#N/A	3	3	1.8	4.7	1.8	#N/A	#N/A	#N/A	#N/A	#N/A	#N/A	#N/A	#N/A
2018-01-21 04:00:00	0.7	7.1	2	6.2	#N/A	4	4	2.2	5.7	2.2	#N/A	3.1	3.1	1.8	4.7	1.8	#N/A	#N/A	#N/A	#N/A	#N/A	#N/A	#N/A	#N/A
2018-01-21 05:00:00	0.7	7.1	1.9	6.2	#N/A	4	4	2.2	5.7	2.2	#N/A	3.2	3.2	1.8	4.7	1.8	#N/A	#N/A	#N/A	#N/A	#N/A	#N/A	#N/A	#N/A
2018-01-21 06:00:00	4.8	7.1	2.1	6.2	#N/A	4	4	2.2	5.7	2.2	#N/A	3.4	3.4	1.8	4.7	1.8	#N/A	#N/A	#N/A	#N/A	#N/A	#N/A	#N/A	#N/A
2018-01-21 07:00:00	5.3	7.1	2.1	6.2	#N/A	4.1	4.1	2.2	5.7	2.2	#N/A	3.7	3.7	1.8	4.7	1.8	#N/A	#N/A	#N/A	#N/A	#N/A	#N/A	#N/A	#N/A
2018-01-21 08:00:00	6.2	7.1	2.1	6.2	#N/A	4.2	4.2	2.2	5.7	2.2	#N/A	3.8	3.8	1.8	4.7	1.8	#N/A	#N/A	#N/A	#N/A	#N/A	#N/A	#N/A	#N/A
2018-01-21 09:00:00	7.8	7.1	2.4	6.2	#N/A	4.2	4.2	2.2	5.7	2.2	#N/A	3.8	3.8	1.8	4.7	1.8	#N/A	#N/A	#N/A	#N/A	#N/A	#N/A	#N/A	#N/A
2018-01-21 10:00:00	8.1	7.1	2.9	6.2	#N/A	4.3	4.3	2.2	5.7	2.2	#N/A	3.9	3.9	1.8	4.7	1.8	#N/A	#N/A	#N/A	#N/A	#N/A	#N/A	#N/A	#N/A
2018-01-21 11:00:00	9.5	7.1	7.4	6.2	#N/A	4.4	4.4	2.2	5.7	2.2	#N/A	3.9	3.9	1.8	4.7	1.8	#N/A	#N/A	#N/A	#N/A	#N/A	#N/A	#N/A	#N/A
2018-01-21 12:00:00	10.4	7.1	9.5	6.2	#N/A	5.6	5.6	2.2	5.7	2.2	#N/A	4	4	1.8	4.7	1.8	#N/A	#N/A	#N/A	#N/A	#N/A	#N/A	#N/A	#N/A
2018-01-21 13:00:00	11.6	7.1	10.9	6.2	#N/A	5.8	5.8	2.2	5.7	2.2	#N/A	4	4	1.8	4.7	1.8	#N/A	#N/A	#N/A	#N/A	#N/A	#N/A	#N/A	#N/A
2018-01-21 14:00:00	13	7.1	11.7	6.2	#N/A	6.1	6.1	2.2	5.7	2.2	#N/A	4	4	1.8	4.7	1.8	#N/A	#N/A	#N/A	#N/A	#N/A	#N/A	#N/A	#N/A
2018-01-21 15:00:00	12.9	7.1	11.7	6.2	#N/A	6.6	6.6	2.2	5.7	2.2	#N/A	4.2	4.2	1.8	4.7	1.8	#N/A	#N/A	#N/A	#N/A	#N/A	#N/A	#N/A	#N/A
2018-01-21 16:00:00	12.7	7.1	12	6.2	#N/A	6.8	6.8	2.2	5.7	2.2	#N/A	4.4	4.4	1.8	4.7	1.8	#N/A	#N/A	#N/A	#N/A	#N/A	#N/A	#N/A	#N/A
2018-01-21 17:00:00	11.8	7.1	10.8	6.2	#N/A	7.2	7.2	2.2	5.7	2.2	#N/A	6.1	6.1	1.8	4.7	1.8	#N/A	#N/A	#N/A	#N/A	#N/A	#N/A	#N/A	#N/A
2018-01-21 18:00:00	11.9	7.1	10.7	6.2	#N/A	7.5	7.5	2.2	5.7	2.2	#N/A	6.9	6.9	1.8	4.7	1.8	#N/A	#N/A	#N/A	#N/A	#N/A	#N/A	#N/A	#N/A
2018-01-21 19:00:00	8.4	7.1	10.3	6.2	#N/A	8	8	2.2	5.7	2.2	#N/A	7.4	7.4	1.8	4.7	1.8	#N/A	#N/A	#N/A	#N/A	#N/A	#N/A	#N/A	#N/A
2018-01-21 20:00:00	10.7	7.1	10	6.2	#N/A	8.4	8.4	2.2	5.7	2.2	#N/A	7.7	7.7	1.8	4.7	1.8	#N/A	#N/A	#N/A	#N/A	#N/A	#N/A	#N/A	#N/A
2018-01-21 21:00:00	10	7.1	8.6	6.2	#N/A	8.5	8.5	2.2	5.7	2.2	#N/A	7.8	7.8	1.8	4.7	1.8	#N/A	#N/A	#N/A	#N/A	#N/A	#N/A	#N/A	#N/A
2018-01-21 22:00:00	6.5	7.1	7.2	6.2	#N/A	8.5	8.5	2.2	5.7	2.2	#N/A	7.9	7.9	1.8	4.7	1.8	#N/A	#N/A	#N/A	#N/A	#N/A	#N/A	#N/A	#N/A
2018-01-21 23:00:00	5.6	7.1	6.6	6.2	#N/A	8.2	8.2	2.2	5.7	2.2	#N/A	7.5	7.5	1.8	4.7	1.8	#N/A	#N/A	#N/A	#N/A	#N/A	#N/A	#N/A	#N/A
2018-01-22	3.6	6.8	5.1	7	#N/A	8.3	8.3	2.2	7.1	2.2	#N/A	7.5	7.5	1.8	6.8	1.8	#N/A	#N/A	#N/A	#N/A	#N/A	#N/A	#N/A	#N/A
2018-01-22 01:00:00	2.4	6.8	4.6	7	#N/A	7.2	7.2	2.2	7.1	2.2	#N/A	7.4	7.4	1.8	6.8	1.8	#N/A	#N/A	#N/A	#N/A	#N/A	#N/A	#N/A	#N/A
2018-01-22 02:00:00	1.4	6.8	4.7	7	#N/A	7.9	7.9	2.2	7.1	2.2	#N/A	7.3	7.3	1.8	6.8	1.8	#N/A	#N/A	#N/A	#N/A	#N/A	#N/A	#N/A	#N/A
2018-01-22 03:00:00	0.9	6.8	5	7	#N/A	7.7	7.7	2.2	7.1	2.2	#N/A	6.8	6.8	1.8	6.8	1.8	#N/A	#N/A	#N/A	#N/A	#N/A	#N/A	#N/A	#N/A
2018-01-22 04:00:00	2.4	6.8	6	7	#N/A	6.7	6.7	2.2	7.1	2.2	#N/A	6.3	6.3	1.8	6.8	1.8	#N/A	#N/A	#N/A	#N/A	#N/A	#N/A	#N/A	#N/A
2018-01-22 05:00:00	2.1	6.8	5.8	7	#N/A	6.5	6.5	2.2	7.1	2.2	#N/A	6.2	6.2	1.8	6.8	1.8	#N/A	#N/A	#N/A	#N/A	#N/A	#N/A	#N/A	#N/A
2018-01-22 06:00:00	1.9	6.8	5.3	7	#N/A	5.9	5.9	2.2	7.1	2.2	#N/A	5.7	5.7	1.8	6.8	1.8	#N/A	#N/A	#N/A	#N/A	#N/A	#N/A	#N/A	#N/A
2018-01-22 07:00:00	2	6.8	4.9	7	#N/A	5.6	5.6	2.2	7.1	2.2	#N/A	5.5	5.5	1.8	6.8	1.8	#N/A	#N/A	#N/A	#N/A	#N/A	#N/A	#N/A	#N/A
2018-01-22 08:00:00	2.5	6.8	5	7	#N/A	5.3	5.3	2.2	7.1	2.2	#N/A	5.5	5.5	1.8	6.8	1.8	#N/A	#N/A	#N/A	#N/A	#N/A	#N/A	#N/A	#N/A
2018-01-22 09:00:00	4.3	6.8	6	7	#N/A	5.2	5.2	2.2	7.1	2.2	#N/A	5.7	5.7	1.8	6.8	1.8	#N/A	#N/A	#N/A	#N/A	#N/A	#N/A	#N/A	#N/A
2018-01-22 10:00:00	9.2	6.8	8.2	7	#N/A	5.7	5.7	2.2	7.1	2.2	#N/A	6.1	6.1	1.8	6.8	1.8	#N/A	#N/A	#N/A	#N/A	#N/A	#N/A	#N/A	#N/A
2018-01-22 11:00:00	12	6.8	10.8	7	#N/A	5.6	5.6	2.2	7.1	2.2	#N/A	6.1	6.1	1.8	6.8	1.8	#N/A	#N/A	#N/A	#N/A	#N/A	#N/A	#N/A	#N/A
2018-01-22 12:00:00	13.9	6.8	13.2	7	#N/A	5.6	5.6	2.2	7.1	2.2	#N/A	5.9	5.9	1.8	6.8	1.8	#N/A	#N/A	#N/A	#N/A	#N/A	#N/A	#N/A	#N/A
2018-01-22 13:00:00	13.3	6.8	13	7	#N/A	5.7	5.7	2.2	7.1	2.2	#N/A	5.8	5.8	1.8	6.8	1.8	#N/A	#N/A	#N/A	#N/A	#N/A	#N/A	#N/A	#N/A
2018-01-22 14:00:00	12.1	6.8	11	7	#N/A	5.9	5.9	2.2	7.1	2.2	#N/A	5.9	5.9	1.8	6.8	1.8	#N/A	#N/A	#N/A	#N/A	#N/A	#N/A	#N/A	#N/A
2018-01-22 15:00:00	11.7	6.8	9.7	7	#N/A	6.4	6.4	2.2	7.1	2.2	#N/A	6.2	6.2	1.8	6.8	1.8	#N/A	#N/A	#N/A	#N/A	#N/A	#N/A	#N/A	#N/A
2018-01-22 16:00:00	9.5	6.8	8.8	7	#N/A	7.9	7.9	2.2	7.1	2.2	#N/A	7.1	7.1	1.8	6.8	1.8	#N/A	#N/A	#N/A	#N/A	#N/A	#N/A	#N/A	#N/A
2018-01-22 17:00:00	11	6.8	9	7	#N/A	8.8	8.8	2.2	7.1	2.2	#N/A	8.1	8.1	1.8	6.8	1.8	#N/A	#N/A	#N/A	#N/A	#N/A	#N/A	#N/A	#N/A
2018-01-22 18:00:00	9.6	6.8	7.6	7	#N/A	9.4	9.4	2.2	7.1	2.2	#N/A	8.9	8.9	1.8	6.8	1.8	#N/A	#N/A	#N/A	#N/A	#N/A	#N/A	#N/A	#N/A
2018-01-22 19:00:00	5.8	6.8	6.1	7	#N/A	9.2	9.2	2.2	7.1	2.2	#N/A	8.9	8.9	1.8	6.8	1.8	#N/A	#N/A	#N/A	#N/A	#N/A	#N/A	#N/A	#N/A
2018-01-22 20:00:00	7.8	6.8	5.5	7	#N/A	8.9	8.9	2.2	7.1	2.2	#N/A	8.2	8.2	1.8	6.8	1.8	#N/A	#N/A	#N/A	#N/A	#N/A	#N/A	#N/A	#N/A
2018-01-22 21:00:00	6.7	6.8	5.3	7	#N/A	8.8	8.8	2.2	7.1	2.2	#N/A	7.7	7.7	1.8	6.8	1.8	#N/A	#N/A	#N/A	#N/A	#N/A	#N/A	#N/A	#N/A
2018-01-22 22:00:00	9	6.8	4.5	7	#N/A	8.2	8.2	2.2	7.1	2.2	#N/A	7.4	7.4	1.8	6.8	1.8	#N/A	#N/A	#N/A	#N/A	#N/A	#N/A	#N/A	#N/A
2018-01-22 23:00:00	8	6.8	4	7	#N/A	8.7	8.7	2.2	7.1	2.2	#N/A	7.5	7.5	1.8	6.8	1.8	#N/A	#N/A	#N/A	#N/A	#N/A	#N/A	#N/A	#N/A
2018-01-23	4.4	5.4	3.4	5.5	#N/A	8.3	8.3	2.2	7.7	2.2	#N/A	7	7	1.8	6.6	1.8	#N/A	#N/A	#N/A	#N/A	#N/A	#N/A	#N/A	#N/A
2018-01-23 01:00:00	2.3	5.4	3.2	5.5	#N/A	7.2	7.2	2.2	7.7	2.2	#N/A	6.5	6.5	1.8	6.6	1.8	#N/A	#N/A	#N/A	#N/A	#N/A	#N/A	#N/A	#N/A
2018-01-23 02:00:00	1.5	5.4	2.6	5.5	#N/A	7.8	7.8	2.2	7.7	2.2	#N/A	6.3	6.3	1.8	6.6	1.8	#N/A	#N/A	#N/A	#N/A	#N/A	#N/A	#N/A	#N/A
2018-01-23 03:00:00	1	5.4	1.6	5.5	#N/A	7.4	7.4	2.2	7.7	2.2	#N/A	6.2	6.2	1.8	6.6	1.8	#N/A	#N/A	#N/A	#N/A	#N/A	#N/A	#N/A	#N/A
2018-01-23 04:00:00	0.8	5.4	1.8	5.5	#N/A	8.1	8.1	2.2	7.7	2.2	#N/A	6	6	1.8	6.6	1.8	#N/A	#N/A	#N/A	#N/A	#N/A	#N/A	#N/A	#N/A
2018-01-23 05:00:00	0.4	5.4	1.4	5.5	#N/A	7.8	7.8	2.2	7.7	2.2	#N/A	5.8	5.8	1.8	6.6	1.8	#N/A	#N/A	#N/A	#N/A	#N/A	#N/A	#N/A	#N/A
2018-01-23 06:00:00	1.5	5.4	1.5	5.5	#N/A	6.8	6.8	2.2	7.7	2.2	#N/A	5.6	5.6	1.8	6.6	1.8	#N/A	#N/A	#N/A	#N/A	#N/A	#N/A	#N/A	#N/A
2018-01-23 07:00:00	2.1	5.4	2.2	5.5	#N/A	6.2	6.2	2.2	7.7	2.2	#N/A	5.5	5.5	1.8	6.6	1.8	#N/A	#N/A	#N/A	#N/A	#N/A	#N/A	#N/A	#N/A
2018-01-23 08:00:00	2.8	5.4	1.5	5.5	#N/A	6	6	2.2	7.7	2.2	#N/A	5.3	5.3	1.8	6.6	1.8	#N/A	#N/A	#N/A	#N/A	#N/A	#N/A	#N/A	#N/A
2018-01-23 09:00:00	7	5.4	1.3	5.5	#N/A	5.8	5.8	2.2	7.7	2.2	#N/A	4.9	4.9	1.8	6.6	1.8	#N/A	#N/A	#N/A	#N/A	#N/A	#N/A	#N/A	#N/A
2018-01-23 10:00:00	10.8	5.4	1.5	5.5	#N/A	5.8	5.8	2.2	7.7	2.2	#N/A	5	5	1.8	6.6	1.8	#N/A	#N/A	#N/A	#N/A	#N/A	#N/A	#N/A	#N/A
2018-01-23 11:00:00	12.3	5.4	8.5	5.5	#N/A	5.7	5.7	2.2	7.7	2.2	#N/A	4.9	4.9	1.8	6.6	1.8	#N/A	#N/A	#N/A	#N/A	#N/A	#N/A	#N/A	#N/A
2018-01-23 12:00:00	14.4	5.4	13.8	5.5	#N/A	6.1	6.1	2.2	7.7	2.2	#N/A	5	5	1.8	6.6	1.8	#N/A	#N/A	#N/A	#N/A	#N/A	#N/A	#N/A	#N/A
2018-01-23 13:00:00	14.2	5.4	15.3	5.5	#N/A	6.3	6.3	2.2	7.7	2.2	#N/A	5.3	5.3	1.8	6.6	1.8	#N/A	#N/A	#N/A	#N/A	#N/A	#N/A	#N/A	#N/A
2018-01-23 14:00:00	15.4	5.4	14.9	5.5	#N/A	6.6	6.6	2.2	7.7	2.2	#N/A	5.1	5.1	1.8	6.6	1.8	#N/A	#N/A	#N/A	#N/A	#N/A	#N/A	#N/A	#N/A
2018-01-23 15:00:00	13.2	5.4	14.3	5.5	#N/A	7.8	7.8	2.2	7.7	2.2	#N/A	5	5	1.8	6.6	1.8	#N/A	#N/A	#N/A	#N/A	#N/A	#N/A	#N/A	#N/A
2018-01-23 16:00:00	9.5	5.4	13.3	5.5	#N/A	9	9	2.2	7.7	2.2	#N/A	5.1	5.1	1.8	6.6	1.8	#N/A	#N/A	#N/A	#N/A	#N/A	#N/A	#N/A	#N/A
2018-01-23 17:00:00	7.8	5.4	8.9	5.5	#N/A	9.4	9.4	2.2	7.7	2.2	#N/A	7.7	7.7	1.8	6.6	1.8	#N/A	#N/A	#N/A	#N/A	#N/A	#N/A	#N/A	#N/A
2018-01-23 18:00:00	3.9	5.4	5.2	5.5	#N/A	10.1	10.1	2.2	7.7	2.2	#N/A	9.6	9.6	1.8	6.6	1.8	#N/A	#N/A	#N/A	#N/A	#N/A	#N/A	#N/A	#N/A
2018-01-23 19:00:00	2.2	5.4	4	5.5	#N/A	10	10	2.2	7.7	2.2	#N/A	10.1	10.1	1.8	6.6	1.8	#N/A	#N/A	#N/A	#N/A	#N/A	#N/A	#N/A	#N/A
2018-01-23 20:00:00	1.3	5.4	3.1	5.5	#N/A	10.3	10.3	2.2	7.7	2.2	#N/A	10	10	1.8	6.6	1.8	#N/A	#N/A	#N/A	#N/A	#N/A	#N/A	#N/A	#N/A
2018-01-23 21:00:00	0.6	5.4	2.7	5.5	#N/A	9.6	9.6	2.2	7.7	2.2	#N/A	9.8	9.8	1.8	6.6	1.8	#N/A	#N/A	#N/A	#N/A	#N/A	#N/A	#N/A	#N/A
2018-01-23 22:00:00	0.5	5.4	3.2	5.5	#N/A	8.5	8.5	2.2	7.7	2.2	#N/A	9.4	9.4	1.8	6.6	1.8	#N/A	#N/A	#N/A	#N/A	#N/A	#N/A	#N/A	#N/A
2018-01-23 23:00:00	-0.2	5.4	3.2	5.5	#N/A	8	8	2.2	7.7	2.2	#N/A	7.8	7.8	1.8	6.6	1.8	#N/A	#N/A	#N/A	#N/A	#N/A	#N/A	#N/A	#N/A
2018-01-24	-0.2	3.5	3.8	5.7	#N/A	6.8	6.8	2.2	6.7	2.2	#N/A	6.4	6.4	1.8	6.9	1.8	#N/A	#N/A	#N/A	#N/A	#N/A	#N/A	#N/A	#N/A
2018-01-24 01:00:00	-0.6	3.5	3.5	5.7	#N/A	6.2	6.2	2.2	6.7	2.2	#N/A	6	6	1.8	6.9	1.8	#N/A	#N/A	#N/A	#N/A	#N/A	#N/A	#N/A	#N/A
2018-01-24 02:00:00	-0.5	3.5	3.4	5.7	#N/A	5.9	5.9	2.2	6.7	2.2	#N/A	5.7	5.7	1.8	6.9	1.8	#N/A	#N/A	#N/A	#N/A	#N/A	#N/A	#N/A	#N/A
2018-01-24 03:00:00	-0.6	3.5	3	5.7	#N/A	5.7	5.7	2.2	6.7	2.2	#N/A	5.6	5.6	1.8	6.9	1.8	#N/A	#N/A	#N/A	#N/A	#N/A	#N/A	#N/A	#N/A
2018-01-24 04:00:00	-0.6	3.5	2.8	5.7	#N/A	5.7	5.7	2.2	6.7	2.2	#N/A	5.7	5.7	1.8	6.9	1.8	#N/A	#N/A	#N/A	#N/A	#N/A	#N/A	#N/A	#N/A
2018-01-24 05:00:00	-0.9	3.5	2.6	5.7	#N/A	5.4	5.4	2.2	6.7	2.2	#N/A	5.7	5.7	1.8	6.9	1.8	#N/A	#N/A	#N/A	#N/A	#N/A	#N/A	#N/A	#N/A
2018-01-24 06:00:00	-0.7	3.5	2.4	5.7	#N/A	5.4	5.4	2.2	6.7	2.2	#N/A	5.9	5.9	1.8	6.9	1.8	#N/A	#N/A	#N/A	#N/A	#N/A	#N/A	#N/A	#N/A
2018-01-24 07:00:00	-0.6	3.5	2.4	5.7	#N/A	5.3	5.3	2.2	6.7	2.2	#N/A	5.9	5.9	1.8	6.9	1.8	#N/A	#N/A	#N/A	#N/A	#N/A	#N/A	#N/A	#N/A
2018-01-24 08:00:00	-0.5	3.5	2.6	5.7	#N/A	5.2	5.2	2.2	6.7	2.2	#N/A	5.8	5.8	1.8	6.9	1.8	#N/A	#N/A	#N/A	#N/A	#N/A	#N/A	#N/A	#N/A
2018-01-24 09:00:00	6.5	3.5	4.3	5.7	#N/A	5.2	5.2	2.2	6.7	2.2	#N/A	5.7	5.7	1.8	6.9	1.8	#N/A	#N/A	#N/A	#N/A	#N/A	#N/A	#N/A	#N/A
2018-01-24 10:00:00	8.6	3.5	5.2	5.7	#N/A	5.3	5.3	2.2	6.7	2.2	#N/A	5.6	5.6	1.8	6.9	1.8	#N/A	#N/A	#N/A	#N/A	#N/A	#N/A	#N/A	#N/A
2018-01-24 11:00:00	10.8	3.5	11.7	5.7	#N/A	5.2	5.2	2.2	6.7	2.2	#N/A	5.6	5.6	1.8	6.9	1.8	#N/A	#N/A	#N/A	#N/A	#N/A	#N/A	#N/A	#N/A
2018-01-24 12:00:00	11	3.5	13.5	5.7	#N/A	5.3	5.3	2.2	6.7	2.2	#N/A	5.6	5.6	1.8	6.9	1.8	#N/A	#N/A	#N/A	#N/A	#N/A	#N/A	#N/A	#N/A
2018-01-24 13:00:00	12.4	3.5	13.9	5.7	#N/A	5.4	5.4	2.2	6.7	2.2	#N/A	5.6	5.6	1.8	6.9	1.8	#N/A	#N/A	#N/A	#N/A	#N/A	#N/A	#N/A	#N/A
2018-01-24 14:00:00	12.8	3.5	13.5	5.7	#N/A	5.4	5.4	2.2	6.7	2.2	#N/A	5.8	5.8	1.8	6.9	1.8	#N/A	#N/A	#N/A	#N/A	#N/A	#N/A	#N/A	#N/A
2018-01-24 15:00:00	12	3.5	11.8	5.7	#N/A	7.6	7.6	2.2	6.7	2.2	#N/A	6.4	6.4	1.8	6.9	1.8	#N/A	#N/A	#N/A	#N/A	#N/A	#N/A	#N/A	#N/A
2018-01-24 16:00:00	7.8	3.5	10.5	5.7	#N/A	8.2	8.2	2.2	6.7	2.2	#N/A	6.8	6.8	1.8	6.9	1.8	#N/A	#N/A	#N/A	#N/A	#N/A	#N/A	#N/A	#N/A
2018-01-24 17:00:00	4.8	3.5	7.4	5.7	#N/A	8.9	8.9	2.2	6.7	2.2	#N/A	9.2	9.2	1.8	6.9	1.8	#N/A	#N/A	#N/A	#N/A	#N/A	#N/A	#N/A	#N/A
2018-01-24 18:00:00	2.9	3.5	4.4	5.7	#N/A	9	9	2.2	6.7	2.2	#N/A	9.8	9.8	1.8	6.9	1.8	#N/A	#N/A	#N/A	#N/A	#N/A	#N/A	#N/A	#N/A
2018-01-24 19:00:00	1.5	3.5	2.9	5.7	#N/A	9.4	9.4	2.2	6.7	2.2	#N/A	10	10	1.8	6.9	1.8	#N/A	#N/A	#N/A	#N/A	#N/A	#N/A	#N/A	#N/A
2018-01-24 20:00:00	0.7	3.5	2.5	5.7	#N/A	9.5	9.5	2.2	6.7	2.2	#N/A	9.9	9.9	1.8	6.9	1.8	#N/A	#N/A	#N/A	#N/A	#N/A	#N/A	#N/A	#N/A
2018-01-24 21:00:00	0	3.5	2.7	5.7	#N/A	9.2	9.2	2.2	6.7	2.2	#N/A	9.3	9.3	1.8	6.9	1.8	#N/A	#N/A	#N/A	#N/A	#N/A	#N/A	#N/A	#N/A
2018-01-24 22:00:00	-0.7	3.5	2.5	5.7	#N/A	8	8	2.2	6.7	2.2	#N/A	8.8	8.8	1.8	6.9	1.8	#N/A	#N/A	#N/A	#N/A	#N/A	#N/A	#N/A	#N/A
2018-01-24 23:00:00	-1	3.5	2.7	5.7	#N/A	7.1	7.1	2.2	6.7	2.2	#N/A	7.7	7.7	1.8	6.9	1.8	#N/A	#N/A	#N/A	#N/A	#N/A	#N/A	#N/A	#N/A
2018-01-25	-1.4	4.4	2.2	4	#N/A	6.5	6.5	2.2	6.4	2.2	#N/A	6.7	6.7	1.8	6.5	1.8	#N/A	#N/A	#N/A	#N/A	#N/A	#N/A	#N/A	#N/A
2018-01-25 01:00:00	-1.9	4.4	1.5	4	#N/A	6.1	6.1	2.2	6.4	2.2	#N/A	6.1	6.1	1.8	6.5	1.8	#N/A	#N/A	#N/A	#N/A	#N/A	#N/A	#N/A	#N/A
2018-01-25 02:00:00	-2.2	4.4	1.3	4	#N/A	5.8	5.8	2.2	6.4	2.2	#N/A	6	6	1.8	6.5	1.8	#N/A	#N/A	#N/A	#N/A	#N/A	#N/A	#N/A	#N/A
2018-01-25 03:00:00	-2.6	4.4	1.1	4	#N/A	5.6	5.6	2.2	6.4	2.2	#N/A	6.1	6.1	1.8	6.5	1.8	#N/A	#N/A	#N/A	#N/A	#N/A	#N/A	#N/A	#N/A
2018-01-25 04:00:00	-2.7	4.4	0.8	4	#N/A	5.4	5.4	2.2	6.4	2.2	#N/A	6.1	6.1	1.8	6.5	1.8	#N/A	#N/A	#N/A	#N/A	#N/A	#N/A	#N/A	#N/A
2018-01-25 05:00:00	-3	4.4	-0.1	4	#N/A	5.3	5.3	2.2	6.4	2.2	#N/A	6.2	6.2	1.8	6.5	1.8	#N/A	#N/A	#N/A	#N/A	#N/A	#N/A	#N/A	#N/A
2018-01-25 06:00:00	-3.1	4.4	-0.6	4	#N/A	5.2	5.2	2.2	6.4	2.2	#N/A	6	6	1.8	6.5	1.8	#N/A	#N/A	#N/A	#N/A	#N/A	#N/A	#N/A	#N/A
2018-01-25 07:00:00	-2.9	4.4	-0.8	4	#N/A	5.1	5.1	2.2	6.4	2.2	#N/A	5.8	5.8	1.8	6.5	1.8	#N/A	#N/A	#N/A	#N/A	#N/A	#N/A	#N/A	#N/A
2018-01-25 08:00:00	-2.3	4.4	0	4	#N/A	5	5	2.2	6.4	2.2	#N/A	5.7	5.7	1.8	6.5	1.8	#N/A	#N/A	#N/A	#N/A	#N/A	#N/A	#N/A	#N/A
2018-01-25 09:00:00	2.2	4.4	1.4	4	#N/A	4.9	4.9	2.2	6.4	2.2	#N/A	5.6	5.6	1.8	6.5	1.8	#N/A	#N/A	#N/A	#N/A	#N/A	#N/A	#N/A	#N/A
2018-01-25 10:00:00	5.2	4.4	4.7	4	#N/A	4.8	4.8	2.2	6.4	2.2	#N/A	5.6	5.6	1.8	6.5	1.8	#N/A	#N/A	#N/A	#N/A	#N/A	#N/A	#N/A	#N/A
2018-01-25 11:00:00	8.9	4.4	7.2	4	#N/A	4.8	4.8	2.2	6.4	2.2	#N/A	5.2	5.2	1.8	6.5	1.8	#N/A	#N/A	#N/A	#N/A	#N/A	#N/A	#N/A	#N/A
2018-01-25 12:00:00	9.8	4.4	9	4	#N/A	4.7	4.7	2.2	6.4	2.2	#N/A	5	5	1.8	6.5	1.8	#N/A	#N/A	#N/A	#N/A	#N/A	#N/A	#N/A	#N/A
2018-01-25 13:00:00	10.2	4.4	9	4	#N/A	4.8	4.8	2.2	6.4	2.2	#N/A	5	5	1.8	6.5	1.8	#N/A	#N/A	#N/A	#N/A	#N/A	#N/A	#N/A	#N/A
2018-01-25 14:00:00	10.5	4.4	8.8	4	#N/A	5	5	2.2	6.4	2.2	#N/A	5.3	5.3	1.8	6.5	1.8	#N/A	#N/A	#N/A	#N/A	#N/A	#N/A	#N/A	#N/A
2018-01-25 15:00:00	9.8	4.4	7.9	4	#N/A	6.3	6.3	2.2	6.4	2.2	#N/A	5.8	5.8	1.8	6.5	1.8	#N/A	#N/A	#N/A	#N/A	#N/A	#N/A	#N/A	#N/A
2018-01-25 16:00:00	9.5	4.4	6.8	4	#N/A	7.2	7.2	2.2	6.4	2.2	#N/A	7	7	1.8	6.5	1.8	#N/A	#N/A	#N/A	#N/A	#N/A	#N/A	#N/A	#N/A
2018-01-25 17:00:00	9.2	4.4	6.2	4	#N/A	8.4	8.4	2.2	6.4	2.2	#N/A	7.9	7.9	1.8	6.5	1.8	#N/A	#N/A	#N/A	#N/A	#N/A	#N/A	#N/A	#N/A
2018-01-25 18:00:00	9.4	4.4	5.8	4	#N/A	8.7	8.7	2.2	6.4	2.2	#N/A	8.6	8.6	1.8	6.5	1.8	#N/A	#N/A	#N/A	#N/A	#N/A	#N/A	#N/A	#N/A
2018-01-25 19:00:00	8.8	4.4	5.6	4	#N/A	8.8	8.8	2.2	6.4	2.2	#N/A	8.6	8.6	1.8	6.5	1.8	#N/A	#N/A	#N/A	#N/A	#N/A	#N/A	#N/A	#N/A
2018-01-25 20:00:00	9.1	4.4	4.6	4	#N/A	9	9	2.2	6.4	2.2	#N/A	8.5	8.5	1.8	6.5	1.8	#N/A	#N/A	#N/A	#N/A	#N/A	#N/A	#N/A	#N/A
2018-01-25 21:00:00	9	4.4	4.1	4	#N/A	8.8	8.8	2.2	6.4	2.2	#N/A	8.2	8.2	1.8	6.5	1.8	#N/A	#N/A	#N/A	#N/A	#N/A	#N/A	#N/A	#N/A
2018-01-25 22:00:00	8.4	4.4	4.4	4	#N/A	8.8	8.8	2.2	6.4	2.2	#N/A	7.8	7.8	1.8	6.5	1.8	#N/A	#N/A	#N/A	#N/A	#N/A	#N/A	#N/A	#N/A
2018-01-25 23:00:00	8	4.4	4	4	#N/A	8.7	8.7	2.2	6.4	2.2	#N/A	7.6	7.6	1.8	6.5	1.8	#N/A	#N/A	#N/A	#N/A	#N/A	#N/A	#N/A	#N/A
2018-01-26	6.7	7.9	3.6	5.3	#N/A	8.8	8.8	2.2	8.8	2.2	#N/A	7.5	7.5	1.8	7.4	1.8	#N/A	#N/A	#N/A	#N/A	#N/A	#N/A	#N/A	#N/A
2018-01-26 01:00:00	4.3	7.9	2.9	5.3	#N/A	8.7	8.7	2.2	8.8	2.2	#N/A	7.4	7.4	1.8	7.4	1.8	#N/A	#N/A	#N/A	#N/A	#N/A	#N/A	#N/A	#N/A
2018-01-26 02:00:00	6.4	7.9	2.5	5.3	#N/A	8.8	8.8	2.2	8.8	2.2	#N/A	7.1	7.1	1.8	7.4	1.8	#N/A	#N/A	#N/A	#N/A	#N/A	#N/A	#N/A	#N/A
2018-01-26 03:00:00	5.5	7.9	3	5.3	#N/A	8.8	8.8	2.2	8.8	2.2	#N/A	6.9	6.9	1.8	7.4	1.8	#N/A	#N/A	#N/A	#N/A	#N/A	#N/A	#N/A	#N/A
2018-01-26 04:00:00	3.9	7.9	3.1	5.3	#N/A	8.7	8.7	2.2	8.8	2.2	#N/A	7	7	1.8	7.4	1.8	#N/A	#N/A	#N/A	#N/A	#N/A	#N/A	#N/A	#N/A
2018-01-26 05:00:00	7.2	7.9	3.6	5.3	#N/A	8.6	8.6	2.2	8.8	2.2	#N/A	6.9	6.9	1.8	7.4	1.8	#N/A	#N/A	#N/A	#N/A	#N/A	#N/A	#N/A	#N/A
2018-01-26 06:00:00	8.3	7.9	4.3	5.3	#N/A	8.3	8.3	2.2	8.8	2.2	#N/A	6.7	6.7	1.8	7.4	1.8	#N/A	#N/A	#N/A	#N/A	#N/A	#N/A	#N/A	#N/A
2018-01-26 07:00:00	8.3	7.9	4.3	5.3	#N/A	7.6	7.6	2.2	8.8	2.2	#N/A	6.5	6.5	1.8	7.4	1.8	#N/A	#N/A	#N/A	#N/A	#N/A	#N/A	#N/A	#N/A
2018-01-26 08:00:00	8.1	7.9	4.3	5.3	#N/A	8.3	8.3	2.2	8.8	2.2	#N/A	6.4	6.4	1.8	7.4	1.8	#N/A	#N/A	#N/A	#N/A	#N/A	#N/A	#N/A	#N/A
2018-01-26 09:00:00	8.4	7.9	5.6	5.3	#N/A	8	8	2.2	8.8	2.2	#N/A	6.6	6.6	1.8	7.4	1.8	#N/A	#N/A	#N/A	#N/A	#N/A	#N/A	#N/A	#N/A
2018-01-26 10:00:00	9.3	7.9	6.6	5.3	#N/A	7.6	7.6	2.2	8.8	2.2	#N/A	6.6	6.6	1.8	7.4	1.8	#N/A	#N/A	#N/A	#N/A	#N/A	#N/A	#N/A	#N/A
2018-01-26 11:00:00	9.3	7.9	7.6	5.3	#N/A	8.6	8.6	2.2	8.8	2.2	#N/A	6.8	6.8	1.8	7.4	1.8	#N/A	#N/A	#N/A	#N/A	#N/A	#N/A	#N/A	#N/A
2018-01-26 12:00:00	9.6	7.9	7.6	5.3	#N/A	9	9	2.2	8.8	2.2	#N/A	7.1	7.1	1.8	7.4	1.8	#N/A	#N/A	#N/A	#N/A	#N/A	#N/A	#N/A	#N/A
2018-01-26 13:00:00	9.7	7.9	8.3	5.3	#N/A	9	9	2.2	8.8	2.2	#N/A	7	7	1.8	7.4	1.8	#N/A	#N/A	#N/A	#N/A	#N/A	#N/A	#N/A	#N/A
2018-01-26 14:00:00	9.7	7.9	8.2	5.3	#N/A	8.9	8.9	2.2	8.8	2.2	#N/A	7	7	1.8	7.4	1.8	#N/A	#N/A	#N/A	#N/A	#N/A	#N/A	#N/A	#N/A
2018-01-26 15:00:00	9.5	7.9	7.5	5.3	#N/A	9	9	2.2	8.8	2.2	#N/A	7.5	7.5	1.8	7.4	1.8	#N/A	#N/A	#N/A	#N/A	#N/A	#N/A	#N/A	#N/A
2018-01-26 16:00:00	9.5	7.9	7.1	5.3	#N/A	9.3	9.3	2.2	8.8	2.2	#N/A	7.9	7.9	1.8	7.4	1.8	#N/A	#N/A	#N/A	#N/A	#N/A	#N/A	#N/A	#N/A
2018-01-26 17:00:00	8.9	7.9	6.4	5.3	#N/A	9.3	9.3	2.2	8.8	2.2	#N/A	8.2	8.2	1.8	7.4	1.8	#N/A	#N/A	#N/A	#N/A	#N/A	#N/A	#N/A	#N/A
2018-01-26 18:00:00	8.6	7.9	5.7	5.3	#N/A	9.4	9.4	2.2	8.8	2.2	#N/A	8.3	8.3	1.8	7.4	1.8	#N/A	#N/A	#N/A	#N/A	#N/A	#N/A	#N/A	#N/A
2018-01-26 19:00:00	8.9	7.9	5.8	5.3	#N/A	9.5	9.5	2.2	8.8	2.2	#N/A	8.6	8.6	1.8	7.4	1.8	#N/A	#N/A	#N/A	#N/A	#N/A	#N/A	#N/A	#N/A
2018-01-26 20:00:00	8.8	7.9	5.4	5.3	#N/A	9.6	9.6	2.2	8.8	2.2	#N/A	8.6	8.6	1.8	7.4	1.8	#N/A	#N/A	#N/A	#N/A	#N/A	#N/A	#N/A	#N/A
2018-01-26 21:00:00	8.6	7.9	5.4	5.3	#N/A	9.6	9.6	2.2	8.8	2.2	#N/A	8.3	8.3	1.8	7.4	1.8	#N/A	#N/A	#N/A	#N/A	#N/A	#N/A	#N/A	#N/A
2018-01-26 22:00:00	7.6	7.9	5.2	5.3	#N/A	9.6	9.6	2.2	8.8	2.2	#N/A	8.2	8.2	1.8	7.4	1.8	#N/A	#N/A	#N/A	#N/A	#N/A	#N/A	#N/A	#N/A
2018-01-26 23:00:00	5.3	7.9	4.3	5.3	#N/A	9.5	9.5	2.2	8.8	2.2	#N/A	8	8	1.8	7.4	1.8	#N/A	#N/A	#N/A	#N/A	#N/A	#N/A	#N/A	#N/A
2018-01-27	4.6	5.1	3.4	4.7	#N/A	9.4	9.4	2.2	9.1	2.2	#N/A	7.7	7.7	1.8	7.9	1.8	#N/A	#N/A	#N/A	#N/A	#N/A	#N/A	#N/A	#N/A
2018-01-27 01:00:00	4.7	5.1	3.2	4.7	#N/A	9.6	9.6	2.2	9.1	2.2	#N/A	7.8	7.8	1.8	7.9	1.8	#N/A	#N/A	#N/A	#N/A	#N/A	#N/A	#N/A	#N/A
2018-01-27 02:00:00	4.6	5.1	3.3	4.7	#N/A	9.5	9.5	2.2	9.1	2.2	#N/A	7.7	7.7	1.8	7.9	1.8	#N/A	#N/A	#N/A	#N/A	#N/A	#N/A	#N/A	#N/A
2018-01-27 03:00:00	4.3	5.1	3.2	4.7	#N/A	9.5	9.5	2.2	9.1	2.2	#N/A	7.7	7.7	1.8	7.9	1.8	#N/A	#N/A	#N/A	#N/A	#N/A	#N/A	#N/A	#N/A
2018-01-27 04:00:00	4.2	5.1	3.1	4.7	#N/A	9.2	9.2	2.2	9.1	2.2	#N/A	7.7	7.7	1.8	7.9	1.8	#N/A	#N/A	#N/A	#N/A	#N/A	#N/A	#N/A	#N/A
2018-01-27 05:00:00	4.2	5.1	3.1	4.7	#N/A	8.5	8.5	2.2	9.1	2.2	#N/A	7.4	7.4	1.8	7.9	1.8	#N/A	#N/A	#N/A	#N/A	#N/A	#N/A	#N/A	#N/A
2018-01-27 06:00:00	3.1	5.1	2.3	4.7	#N/A	8.3	8.3	2.2	9.1	2.2	#N/A	7.1	7.1	1.8	7.9	1.8	#N/A	#N/A	#N/A	#N/A	#N/A	#N/A	#N/A	#N/A
2018-01-27 07:00:00	2.7	5.1	2.1	4.7	#N/A	8.4	8.4	2.2	9.1	2.2	#N/A	7	7	1.8	7.9	1.8	#N/A	#N/A	#N/A	#N/A	#N/A	#N/A	#N/A	#N/A
2018-01-27 08:00:00	3.1	5.1	2.2	4.7	#N/A	8.4	8.4	2.2	9.1	2.2	#N/A	7.1	7.1	1.8	7.9	1.8	#N/A	#N/A	#N/A	#N/A	#N/A	#N/A	#N/A	#N/A
2018-01-27 09:00:00	4.2	5.1	2.9	4.7	#N/A	8.3	8.3	2.2	9.1	2.2	#N/A	7.1	7.1	1.8	7.9	1.8	#N/A	#N/A	#N/A	#N/A	#N/A	#N/A	#N/A	#N/A
2018-01-27 10:00:00	6.1	5.1	4.7	4.7	#N/A	8.3	8.3	2.2	9.1	2.2	#N/A	7.1	7.1	1.8	7.9	1.8	#N/A	#N/A	#N/A	#N/A	#N/A	#N/A	#N/A	#N/A
2018-01-27 11:00:00	7.7	5.1	6.4	4.7	#N/A	8.3	8.3	2.2	9.1	2.2	#N/A	7.1	7.1	1.8	7.9	1.8	#N/A	#N/A	#N/A	#N/A	#N/A	#N/A	#N/A	#N/A
2018-01-27 12:00:00	9.5	5.1	8.2	4.7	#N/A	8	8	2.2	9.1	2.2	#N/A	6.8	6.8	1.8	7.9	1.8	#N/A	#N/A	#N/A	#N/A	#N/A	#N/A	#N/A	#N/A
2018-01-27 13:00:00	11.3	5.1	8.8	4.7	#N/A	7.9	7.9	2.2	9.1	2.2	#N/A	6.8	6.8	1.8	7.9	1.8	#N/A	#N/A	#N/A	#N/A	#N/A	#N/A	#N/A	#N/A
2018-01-27 14:00:00	12	5.1	10.6	4.7	#N/A	8.1	8.1	2.2	9.1	2.2	#N/A	6.8	6.8	1.8	7.9	1.8	#N/A	#N/A	#N/A	#N/A	#N/A	#N/A	#N/A	#N/A
2018-01-27 15:00:00	8.6	5.1	10.2	4.7	#N/A	8.5	8.5	2.2	9.1	2.2	#N/A	7.2	7.2	1.8	7.9	1.8	#N/A	#N/A	#N/A	#N/A	#N/A	#N/A	#N/A	#N/A
2018-01-27 16:00:00	7.9	5.1	9.9	4.7	#N/A	9.1	9.1	2.2	9.1	2.2	#N/A	7.8	7.8	1.8	7.9	1.8	#N/A	#N/A	#N/A	#N/A	#N/A	#N/A	#N/A	#N/A
2018-01-27 17:00:00	6.3	5.1	8	4.7	#N/A	9.6	9.6	2.2	9.1	2.2	#N/A	8.5	8.5	1.8	7.9	1.8	#N/A	#N/A	#N/A	#N/A	#N/A	#N/A	#N/A	#N/A
2018-01-27 18:00:00	4.9	5.1	5.8	4.7	#N/A	10.2	10.2	2.2	9.1	2.2	#N/A	9.2	9.2	1.8	7.9	1.8	#N/A	#N/A	#N/A	#N/A	#N/A	#N/A	#N/A	#N/A
2018-01-27 19:00:00	3	5.1	3.9	4.7	#N/A	10.7	10.7	2.2	9.1	2.2	#N/A	9.4	9.4	1.8	7.9	1.8	#N/A	#N/A	#N/A	#N/A	#N/A	#N/A	#N/A	#N/A
2018-01-27 20:00:00	1.9	5.1	2.5	4.7	#N/A	10.9	10.9	2.2	9.1	2.2	#N/A	10.1	10.1	1.8	7.9	1.8	#N/A	#N/A	#N/A	#N/A	#N/A	#N/A	#N/A	#N/A
2018-01-27 21:00:00	1.3	5.1	2.1	4.7	#N/A	9.9	9.9	2.2	9.1	2.2	#N/A	9.9	9.9	1.8	7.9	1.8	#N/A	#N/A	#N/A	#N/A	#N/A	#N/A	#N/A	#N/A
2018-01-27 22:00:00	0.9	5.1	1.4	4.7	#N/A	9.7	9.7	2.2	9.1	2.2	#N/A	9.8	9.8	1.8	7.9	1.8	#N/A	#N/A	#N/A	#N/A	#N/A	#N/A	#N/A	#N/A
2018-01-27 23:00:00	0.5	5.1	0.8	4.7	#N/A	9.3	9.3	2.2	9.1	2.2	#N/A	9.2	9.2	1.8	7.9	1.8	#N/A	#N/A	#N/A	#N/A	#N/A	#N/A	#N/A	#N/A
2018-01-28	0.4	2.8	0.4	3.8	#N/A	8.8	8.8	2.2	8.1	2.2	#N/A	8.3	8.3	1.8	7.5	1.8	#N/A	#N/A	#N/A	#N/A	#N/A	#N/A	#N/A	#N/A
2018-01-28 01:00:00	-0.3	2.8	0.3	3.8	#N/A	8.3	8.3	2.2	8.1	2.2	#N/A	7.7	7.7	1.8	7.5	1.8	#N/A	#N/A	#N/A	#N/A	#N/A	#N/A	#N/A	#N/A
2018-01-28 02:00:00	-0.7	2.8	0.2	3.8	#N/A	8	8	2.2	8.1	2.2	#N/A	7.2	7.2	1.8	7.5	1.8	#N/A	#N/A	#N/A	#N/A	#N/A	#N/A	#N/A	#N/A
2018-01-28 03:00:00	-1.1	2.8	-0.4	3.8	#N/A	7.7	7.7	2.2	8.1	2.2	#N/A	7	7	1.8	7.5	1.8	#N/A	#N/A	#N/A	#N/A	#N/A	#N/A	#N/A	#N/A
2018-01-28 04:00:00	-1.3	2.8	-0.5	3.8	#N/A	7.6	7.6	2.2	8.1	2.2	#N/A	6.7	6.7	1.8	7.5	1.8	#N/A	#N/A	#N/A	#N/A	#N/A	#N/A	#N/A	#N/A
2018-01-28 05:00:00	-1.4	2.8	-0.8	3.8	#N/A	7.5	7.5	2.2	8.1	2.2	#N/A	6.5	6.5	1.8	7.5	1.8	#N/A	#N/A	#N/A	#N/A	#N/A	#N/A	#N/A	#N/A
2018-01-28 06:00:00	-1.8	2.8	-0.7	3.8	#N/A	7.4	7.4	2.2	8.1	2.2	#N/A	6.4	6.4	1.8	7.5	1.8	#N/A	#N/A	#N/A	#N/A	#N/A	#N/A	#N/A	#N/A
2018-01-28 07:00:00	-1.9	2.8	-1	3.8	#N/A	7.2	7.2	2.2	8.1	2.2	#N/A	6.3	6.3	1.8	7.5	1.8	#N/A	#N/A	#N/A	#N/A	#N/A	#N/A	#N/A	#N/A
2018-01-28 08:00:00	-1.8	2.8	-0.8	3.8	#N/A	7	7	2.2	8.1	2.2	#N/A	6.3	6.3	1.8	7.5	1.8	#N/A	#N/A	#N/A	#N/A	#N/A	#N/A	#N/A	#N/A
2018-01-28 09:00:00	3.6	2.8	-0.2	3.8	#N/A	6.9	6.9	2.2	8.1	2.2	#N/A	6	6	1.8	7.5	1.8	#N/A	#N/A	#N/A	#N/A	#N/A	#N/A	#N/A	#N/A
2018-01-28 10:00:00	4.8	2.8	2.1	3.8	#N/A	6.8	6.8	2.2	8.1	2.2	#N/A	6	6	1.8	7.5	1.8	#N/A	#N/A	#N/A	#N/A	#N/A	#N/A	#N/A	#N/A
2018-01-28 11:00:00	8.4	2.8	9.4	3.8	#N/A	6.8	6.8	2.2	8.1	2.2	#N/A	5.9	5.9	1.8	7.5	1.8	#N/A	#N/A	#N/A	#N/A	#N/A	#N/A	#N/A	#N/A
2018-01-28 12:00:00	10	2.8	11.2	3.8	#N/A	6.7	6.7	2.2	8.1	2.2	#N/A	6	6	1.8	7.5	1.8	#N/A	#N/A	#N/A	#N/A	#N/A	#N/A	#N/A	#N/A
2018-01-28 13:00:00	12.2	2.8	12	3.8	#N/A	6.6	6.6	2.2	8.1	2.2	#N/A	5.8	5.8	1.8	7.5	1.8	#N/A	#N/A	#N/A	#N/A	#N/A	#N/A	#N/A	#N/A
2018-01-28 14:00:00	12.6	2.8	12.5	3.8	#N/A	6.7	6.7	2.2	8.1	2.2	#N/A	5.9	5.9	1.8	7.5	1.8	#N/A	#N/A	#N/A	#N/A	#N/A	#N/A	#N/A	#N/A
2018-01-28 15:00:00	10.3	2.8	11.5	3.8	#N/A	8.3	8.3	2.2	8.1	2.2	#N/A	6.1	6.1	1.8	7.5	1.8	#N/A	#N/A	#N/A	#N/A	#N/A	#N/A	#N/A	#N/A
2018-01-28 16:00:00	7.6	2.8	11.1	3.8	#N/A	8.6	8.6	2.2	8.1	2.2	#N/A	6.9	6.9	1.8	7.5	1.8	#N/A	#N/A	#N/A	#N/A	#N/A	#N/A	#N/A	#N/A
2018-01-28 17:00:00	5.2	2.8	7.8	3.8	#N/A	9.6	9.6	2.2	8.1	2.2	#N/A	9.6	9.6	1.8	7.5	1.8	#N/A	#N/A	#N/A	#N/A	#N/A	#N/A	#N/A	#N/A
2018-01-28 18:00:00	2.7	2.8	4.7	3.8	#N/A	10	10	2.2	8.1	2.2	#N/A	10.2	10.2	1.8	7.5	1.8	#N/A	#N/A	#N/A	#N/A	#N/A	#N/A	#N/A	#N/A
2018-01-28 19:00:00	1.1	2.8	4	3.8	#N/A	10.7	10.7	2.2	8.1	2.2	#N/A	10.5	10.5	1.8	7.5	1.8	#N/A	#N/A	#N/A	#N/A	#N/A	#N/A	#N/A	#N/A
2018-01-28 20:00:00	0.1	2.8	3.2	3.8	#N/A	10.7	10.7	2.2	8.1	2.2	#N/A	10.6	10.6	1.8	7.5	1.8	#N/A	#N/A	#N/A	#N/A	#N/A	#N/A	#N/A	#N/A
2018-01-28 21:00:00	-0.2	2.8	2.5	3.8	#N/A	10	10	2.2	8.1	2.2	#N/A	10.2	10.2	1.8	7.5	1.8	#N/A	#N/A	#N/A	#N/A	#N/A	#N/A	#N/A	#N/A
2018-01-28 22:00:00	-0.8	2.8	1.5	3.8	#N/A	9.2	9.2	2.2	8.1	2.2	#N/A	10.1	10.1	1.8	7.5	1.8	#N/A	#N/A	#N/A	#N/A	#N/A	#N/A	#N/A	#N/A
2018-01-28 23:00:00	-0.8	2.8	0.7	3.8	#N/A	8.4	8.4	2.2	8.1	2.2	#N/A	8.9	8.9	1.8	7.5	1.8	#N/A	#N/A	#N/A	#N/A	#N/A	#N/A	#N/A	#N/A
2018-01-29	-1.3	2.6	0.5	4.7	#N/A	7.6	7.6	2.2	7.4	2.2	#N/A	7.7	7.7	1.8	7.5	1.8	#N/A	#N/A	#N/A	#N/A	#N/A	#N/A	#N/A	#N/A
2018-01-29 01:00:00	-1.7	2.6	0.4	4.7	#N/A	7.1	7.1	2.2	7.4	2.2	#N/A	7.4	7.4	1.8	7.5	1.8	#N/A	#N/A	#N/A	#N/A	#N/A	#N/A	#N/A	#N/A
2018-01-29 02:00:00	-1.7	2.6	1	4.7	#N/A	6.8	6.8	2.2	7.4	2.2	#N/A	7.1	7.1	1.8	7.5	1.8	#N/A	#N/A	#N/A	#N/A	#N/A	#N/A	#N/A	#N/A
2018-01-29 03:00:00	-1.9	2.6	1	4.7	#N/A	6.7	6.7	2.2	7.4	2.2	#N/A	6.8	6.8	1.8	7.5	1.8	#N/A	#N/A	#N/A	#N/A	#N/A	#N/A	#N/A	#N/A
2018-01-29 04:00:00	-1.9	2.6	1	4.7	#N/A	6.5	6.5	2.2	7.4	2.2	#N/A	6.5	6.5	1.8	7.5	1.8	#N/A	#N/A	#N/A	#N/A	#N/A	#N/A	#N/A	#N/A
2018-01-29 05:00:00	-2.3	2.6	1.1	4.7	#N/A	6.5	6.5	2.2	7.4	2.2	#N/A	6.2	6.2	1.8	7.5	1.8	#N/A	#N/A	#N/A	#N/A	#N/A	#N/A	#N/A	#N/A
2018-01-29 06:00:00	-2.6	2.6	0.2	4.7	#N/A	6.3	6.3	2.2	7.4	2.2	#N/A	6.1	6.1	1.8	7.5	1.8	#N/A	#N/A	#N/A	#N/A	#N/A	#N/A	#N/A	#N/A
2018-01-29 07:00:00	-2.9	2.6	-0.1	4.7	#N/A	6.2	6.2	2.2	7.4	2.2	#N/A	6	6	1.8	7.5	1.8	#N/A	#N/A	#N/A	#N/A	#N/A	#N/A	#N/A	#N/A
2018-01-29 08:00:00	-2.5	2.6	0.6	4.7	#N/A	6.2	6.2	2.2	7.4	2.2	#N/A	6.2	6.2	1.8	7.5	1.8	#N/A	#N/A	#N/A	#N/A	#N/A	#N/A	#N/A	#N/A
2018-01-29 09:00:00	3.1	2.6	1.6	4.7	#N/A	6.1	6.1	2.2	7.4	2.2	#N/A	6.2	6.2	1.8	7.5	1.8	#N/A	#N/A	#N/A	#N/A	#N/A	#N/A	#N/A	#N/A
2018-01-29 10:00:00	8.2	2.6	3.8	4.7	#N/A	6.1	6.1	2.2	7.4	2.2	#N/A	6.2	6.2	1.8	7.5	1.8	#N/A	#N/A	#N/A	#N/A	#N/A	#N/A	#N/A	#N/A
2018-01-29 11:00:00	10.6	2.6	11.4	4.7	#N/A	6	6	2.2	7.4	2.2	#N/A	6.2	6.2	1.8	7.5	1.8	#N/A	#N/A	#N/A	#N/A	#N/A	#N/A	#N/A	#N/A
2018-01-29 12:00:00	11	2.6	12.7	4.7	#N/A	5.9	5.9	2.2	7.4	2.2	#N/A	5.9	5.9	1.8	7.5	1.8	#N/A	#N/A	#N/A	#N/A	#N/A	#N/A	#N/A	#N/A
2018-01-29 13:00:00	11.9	2.6	12.9	4.7	#N/A	5.8	5.8	2.2	7.4	2.2	#N/A	5.8	5.8	1.8	7.5	1.8	#N/A	#N/A	#N/A	#N/A	#N/A	#N/A	#N/A	#N/A
2018-01-29 14:00:00	12.9	2.6	13.2	4.7	#N/A	5.9	5.9	2.2	7.4	2.2	#N/A	6	6	1.8	7.5	1.8	#N/A	#N/A	#N/A	#N/A	#N/A	#N/A	#N/A	#N/A
2018-01-29 15:00:00	10.8	2.6	12.3	4.7	#N/A	7.6	7.6	2.2	7.4	2.2	#N/A	6.4	6.4	1.8	7.5	1.8	#N/A	#N/A	#N/A	#N/A	#N/A	#N/A	#N/A	#N/A
2018-01-29 16:00:00	7.8	2.6	11.8	4.7	#N/A	9.1	9.1	2.2	7.4	2.2	#N/A	7.2	7.2	1.8	7.5	1.8	#N/A	#N/A	#N/A	#N/A	#N/A	#N/A	#N/A	#N/A
2018-01-29 17:00:00	5	2.6	9	4.7	#N/A	9.8	9.8	2.2	7.4	2.2	#N/A	10	10	1.8	7.5	1.8	#N/A	#N/A	#N/A	#N/A	#N/A	#N/A	#N/A	#N/A
2018-01-29 18:00:00	2.2	2.6	5.4	4.7	#N/A	9.8	9.8	2.2	7.4	2.2	#N/A	10.4	10.4	1.8	7.5	1.8	#N/A	#N/A	#N/A	#N/A	#N/A	#N/A	#N/A	#N/A
2018-01-29 19:00:00	0.7	2.6	3.8	4.7	#N/A	10.1	10.1	2.2	7.4	2.2	#N/A	10.5	10.5	1.8	7.5	1.8	#N/A	#N/A	#N/A	#N/A	#N/A	#N/A	#N/A	#N/A
2018-01-29 20:00:00	-0.2	2.6	3.2	4.7	#N/A	10.3	10.3	2.2	7.4	2.2	#N/A	10.6	10.6	1.8	7.5	1.8	#N/A	#N/A	#N/A	#N/A	#N/A	#N/A	#N/A	#N/A
2018-01-29 21:00:00	-0.7	2.6	2.1	4.7	#N/A	9.7	9.7	2.2	7.4	2.2	#N/A	10.3	10.3	1.8	7.5	1.8	#N/A	#N/A	#N/A	#N/A	#N/A	#N/A	#N/A	#N/A
2018-01-29 22:00:00	-1.2	2.6	1.5	4.7	#N/A	8.7	8.7	2.2	7.4	2.2	#N/A	10.1	10.1	1.8	7.5	1.8	#N/A	#N/A	#N/A	#N/A	#N/A	#N/A	#N/A	#N/A
2018-01-29 23:00:00	-1.7	2.6	1.4	4.7	#N/A	7.8	7.8	2.2	7.4	2.2	#N/A	9	9	1.8	7.5	1.8	#N/A	#N/A	#N/A	#N/A	#N/A	#N/A	#N/A	#N/A
2018-01-30	-2.1	2.3	1.1	3.3	#N/A	7	7	2.2	6.6	2.2	#N/A	7.7	7.7	1.8	6.9	1.8	#N/A	#N/A	#N/A	#N/A	#N/A	#N/A	#N/A	#N/A
2018-01-30 01:00:00	-2.2	2.3	0.9	3.3	#N/A	6.5	6.5	2.2	6.6	2.2	#N/A	7.2	7.2	1.8	6.9	1.8	#N/A	#N/A	#N/A	#N/A	#N/A	#N/A	#N/A	#N/A
2018-01-30 02:00:00	-2.3	2.3	0	3.3	#N/A	6.2	6.2	2.2	6.6	2.2	#N/A	6.9	6.9	1.8	6.9	1.8	#N/A	#N/A	#N/A	#N/A	#N/A	#N/A	#N/A	#N/A
2018-01-30 03:00:00	-2.6	2.3	-0.1	3.3	#N/A	6	6	2.2	6.6	2.2	#N/A	6.5	6.5	1.8	6.9	1.8	#N/A	#N/A	#N/A	#N/A	#N/A	#N/A	#N/A	#N/A
2018-01-30 04:00:00	-2.8	2.3	-0.5	3.3	#N/A	5.9	5.9	2.2	6.6	2.2	#N/A	6.3	6.3	1.8	6.9	1.8	#N/A	#N/A	#N/A	#N/A	#N/A	#N/A	#N/A	#N/A
2018-01-30 05:00:00	-2.8	2.3	-0.3	3.3	#N/A	5.7	5.7	2.2	6.6	2.2	#N/A	6.3	6.3	1.8	6.9	1.8	#N/A	#N/A	#N/A	#N/A	#N/A	#N/A	#N/A	#N/A
2018-01-30 06:00:00	-3.2	2.3	-0.6	3.3	#N/A	5.6	5.6	2.2	6.6	2.2	#N/A	6.1	6.1	1.8	6.9	1.8	#N/A	#N/A	#N/A	#N/A	#N/A	#N/A	#N/A	#N/A
2018-01-30 07:00:00	-3.5	2.3	-1.3	3.3	#N/A	5.5	5.5	2.2	6.6	2.2	#N/A	6	6	1.8	6.9	1.8	#N/A	#N/A	#N/A	#N/A	#N/A	#N/A	#N/A	#N/A
2018-01-30 08:00:00	-3.2	2.3	-0.5	3.3	#N/A	5.5	5.5	2.2	6.6	2.2	#N/A	5.7	5.7	1.8	6.9	1.8	#N/A	#N/A	#N/A	#N/A	#N/A	#N/A	#N/A	#N/A
2018-01-30 09:00:00	1.5	2.3	-0.2	3.3	#N/A	5.3	5.3	2.2	6.6	2.2	#N/A	5.7	5.7	1.8	6.9	1.8	#N/A	#N/A	#N/A	#N/A	#N/A	#N/A	#N/A	#N/A
2018-01-30 10:00:00	4.5	2.3	1.6	3.3	#N/A	5.2	5.2	2.2	6.6	2.2	#N/A	5.5	5.5	1.8	6.9	1.8	#N/A	#N/A	#N/A	#N/A	#N/A	#N/A	#N/A	#N/A
2018-01-30 11:00:00	7.8	2.3	7.7	3.3	#N/A	5.2	5.2	2.2	6.6	2.2	#N/A	5.6	5.6	1.8	6.9	1.8	#N/A	#N/A	#N/A	#N/A	#N/A	#N/A	#N/A	#N/A
2018-01-30 12:00:00	8.4	2.3	9.6	3.3	#N/A	5.1	5.1	2.2	6.6	2.2	#N/A	5.5	5.5	1.8	6.9	1.8	#N/A	#N/A	#N/A	#N/A	#N/A	#N/A	#N/A	#N/A
2018-01-30 13:00:00	10.7	2.3	11	3.3	#N/A	4.9	4.9	2.2	6.6	2.2	#N/A	5.2	5.2	1.8	6.9	1.8	#N/A	#N/A	#N/A	#N/A	#N/A	#N/A	#N/A	#N/A
2018-01-30 14:00:00	11.4	2.3	11.4	3.3	#N/A	5	5	2.2	6.6	2.2	#N/A	5.5	5.5	1.8	6.9	1.8	#N/A	#N/A	#N/A	#N/A	#N/A	#N/A	#N/A	#N/A
2018-01-30 15:00:00	10	2.3	10	3.3	#N/A	6.4	6.4	2.2	6.6	2.2	#N/A	5.5	5.5	1.8	6.9	1.8	#N/A	#N/A	#N/A	#N/A	#N/A	#N/A	#N/A	#N/A
2018-01-30 16:00:00	8.4	2.3	8.9	3.3	#N/A	7.3	7.3	2.2	6.6	2.2	#N/A	6.2	6.2	1.8	6.9	1.8	#N/A	#N/A	#N/A	#N/A	#N/A	#N/A	#N/A	#N/A
2018-01-30 17:00:00	3.1	2.3	5.7	3.3	#N/A	8.2	8.2	2.2	6.6	2.2	#N/A	8.4	8.4	1.8	6.9	1.8	#N/A	#N/A	#N/A	#N/A	#N/A	#N/A	#N/A	#N/A
2018-01-30 18:00:00	1.5	2.3	2.8	3.3	#N/A	8.4	8.4	2.2	6.6	2.2	#N/A	9.1	9.1	1.8	6.9	1.8	#N/A	#N/A	#N/A	#N/A	#N/A	#N/A	#N/A	#N/A
2018-01-30 19:00:00	1.3	2.3	1.7	3.3	#N/A	9.1	9.1	2.2	6.6	2.2	#N/A	9.5	9.5	1.8	6.9	1.8	#N/A	#N/A	#N/A	#N/A	#N/A	#N/A	#N/A	#N/A
2018-01-30 20:00:00	2.3	2.3	2.2	3.3	#N/A	9.3	9.3	2.2	6.6	2.2	#N/A	9.7	9.7	1.8	6.9	1.8	#N/A	#N/A	#N/A	#N/A	#N/A	#N/A	#N/A	#N/A
2018-01-30 21:00:00	2.7	2.3	2.6	3.3	#N/A	8.9	8.9	2.2	6.6	2.2	#N/A	9.2	9.2	1.8	6.9	1.8	#N/A	#N/A	#N/A	#N/A	#N/A	#N/A	#N/A	#N/A
2018-01-30 22:00:00	3.1	2.3	2.5	3.3	#N/A	8.4	8.4	2.2	6.6	2.2	#N/A	8.8	8.8	1.8	6.9	1.8	#N/A	#N/A	#N/A	#N/A	#N/A	#N/A	#N/A	#N/A
2018-01-30 23:00:00	3.1	2.3	2.5	3.3	#N/A	6.9	6.9	2.2	6.6	2.2	#N/A	7.6	7.6	1.8	6.9	1.8	#N/A	#N/A	#N/A	#N/A	#N/A	#N/A	#N/A	#N/A
2018-01-31	3.2	3.3	2.3	2.8	#N/A	6.4	6.4	2.2	7.1	2.2	#N/A	6.6	6.6	1.8	6.5	1.8	#N/A	#N/A	#N/A	#N/A	#N/A	#N/A	#N/A	#N/A
2018-01-31 01:00:00	3.3	3.3	2.1	2.8	#N/A	6.4	6.4	2.2	7.1	2.2	#N/A	6.2	6.2	1.8	6.5	1.8	#N/A	#N/A	#N/A	#N/A	#N/A	#N/A	#N/A	#N/A
2018-01-31 02:00:00	3.4	3.3	1.7	2.8	#N/A	6.7	6.7	2.2	7.1	2.2	#N/A	6.3	6.3	1.8	6.5	1.8	#N/A	#N/A	#N/A	#N/A	#N/A	#N/A	#N/A	#N/A
2018-01-31 03:00:00	2.1	3.3	0.2	2.8	#N/A	6.8	6.8	2.2	7.1	2.2	#N/A	6.5	6.5	1.8	6.5	1.8	#N/A	#N/A	#N/A	#N/A	#N/A	#N/A	#N/A	#N/A
2018-01-31 04:00:00	1.4	3.3	-0.8	2.8	#N/A	7	7	2.2	7.1	2.2	#N/A	6.4	6.4	1.8	6.5	1.8	#N/A	#N/A	#N/A	#N/A	#N/A	#N/A	#N/A	#N/A
2018-01-31 05:00:00	1.8	3.3	0.3	2.8	#N/A	7	7	2.2	7.1	2.2	#N/A	6.4	6.4	1.8	6.5	1.8	#N/A	#N/A	#N/A	#N/A	#N/A	#N/A	#N/A	#N/A
2018-01-31 06:00:00	1.8	3.3	0.5	2.8	#N/A	7	7	2.2	7.1	2.2	#N/A	6.3	6.3	1.8	6.5	1.8	#N/A	#N/A	#N/A	#N/A	#N/A	#N/A	#N/A	#N/A
2018-01-31 07:00:00	2.2	3.3	0.4	2.8	#N/A	7.1	7.1	2.2	7.1	2.2	#N/A	6.2	6.2	1.8	6.5	1.8	#N/A	#N/A	#N/A	#N/A	#N/A	#N/A	#N/A	#N/A
2018-01-31 08:00:00	2.4	3.3	0.2	2.8	#N/A	7.1	7.1	2.2	7.1	2.2	#N/A	6.1	6.1	1.8	6.5	1.8	#N/A	#N/A	#N/A	#N/A	#N/A	#N/A	#N/A	#N/A
2018-01-31 09:00:00	2.2	3.3	0.4	2.8	#N/A	6.7	6.7	2.2	7.1	2.2	#N/A	5.5	5.5	1.8	6.5	1.8	#N/A	#N/A	#N/A	#N/A	#N/A	#N/A	#N/A	#N/A
2018-01-31 10:00:00	2.5	3.3	0.8	2.8	#N/A	6.5	6.5	2.2	7.1	2.2	#N/A	5.2	5.2	1.8	6.5	1.8	#N/A	#N/A	#N/A	#N/A	#N/A	#N/A	#N/A	#N/A
2018-01-31 11:00:00	4	3.3	2.4	2.8	#N/A	6.6	6.6	2.2	7.1	2.2	#N/A	5.5	5.5	1.8	6.5	1.8	#N/A	#N/A	#N/A	#N/A	#N/A	#N/A	#N/A	#N/A
2018-01-31 12:00:00	6.8	3.3	6.4	2.8	#N/A	6.5	6.5	2.2	7.1	2.2	#N/A	5.5	5.5	1.8	6.5	1.8	#N/A	#N/A	#N/A	#N/A	#N/A	#N/A	#N/A	#N/A
2018-01-31 13:00:00	8.3	3.3	7.9	2.8	#N/A	6.6	6.6	2.2	7.1	2.2	#N/A	5.5	5.5	1.8	6.5	1.8	#N/A	#N/A	#N/A	#N/A	#N/A	#N/A	#N/A	#N/A
2018-01-31 14:00:00	9.6	3.3	8.7	2.8	#N/A	6.7	6.7	2.2	7.1	2.2	#N/A	5.4	5.4	1.8	6.5	1.8	#N/A	#N/A	#N/A	#N/A	#N/A	#N/A	#N/A	#N/A
2018-01-31 15:00:00	9.5	3.3	8.8	2.8	#N/A	6.6	6.6	2.2	7.1	2.2	#N/A	5.5	5.5	1.8	6.5	1.8	#N/A	#N/A	#N/A	#N/A	#N/A	#N/A	#N/A	#N/A
2018-01-31 16:00:00	6.5	3.3	8.1	2.8	#N/A	6.7	6.7	2.2	7.1	2.2	#N/A	5.6	5.6	1.8	6.5	1.8	#N/A	#N/A	#N/A	#N/A	#N/A	#N/A	#N/A	#N/A
2018-01-31 17:00:00	3.4	3.3	5.7	2.8	#N/A	7.1	7.1	2.2	7.1	2.2	#N/A	6.2	6.2	1.8	6.5	1.8	#N/A	#N/A	#N/A	#N/A	#N/A	#N/A	#N/A	#N/A
2018-01-31 18:00:00	1.7	3.3	2.5	2.8	#N/A	7.9	7.9	2.2	7.1	2.2	#N/A	7.6	7.6	1.8	6.5	1.8	#N/A	#N/A	#N/A	#N/A	#N/A	#N/A	#N/A	#N/A
2018-01-31 19:00:00	0.1	3.3	1.2	2.8	#N/A	8.4	8.4	2.2	7.1	2.2	#N/A	8.1	8.1	1.8	6.5	1.8	#N/A	#N/A	#N/A	#N/A	#N/A	#N/A	#N/A	#N/A
2018-01-31 20:00:00	-0.9	3.3	0.8	2.8	#N/A	8.8	8.8	2.2	7.1	2.2	#N/A	8.4	8.4	1.8	6.5	1.8	#N/A	#N/A	#N/A	#N/A	#N/A	#N/A	#N/A	#N/A
2018-01-31 21:00:00	0.8	3.3	2	2.8	#N/A	8.7	8.7	2.2	7.1	2.2	#N/A	8.5	8.5	1.8	6.5	1.8	#N/A	#N/A	#N/A	#N/A	#N/A	#N/A	#N/A	#N/A
2018-01-31 22:00:00	1.7	3.3	1.9	2.8	#N/A	7.9	7.9	2.2	7.1	2.2	#N/A	8.2	8.2	1.8	6.5	1.8	#N/A	#N/A	#N/A	#N/A	#N/A	#N/A	#N/A	#N/A
2018-01-31 23:00:00	2.3	3.3	1.8	2.8	#N/A	7	7	2.2	7.1	2.2	#N/A	7.3	7.3	1.8	6.5	1.8	#N/A	#N/A	#N/A	#N/A	#N/A	#N/A	#N/A	#N/A
2018-02-01	2.4	0.9	1.5	-0.1	#N/A	6.5	6.5	2.2	6.3	2.2	#N/A	6.2	6.2	1.8	5.4	1.8	#N/A	#N/A	#N/A	#N/A	#N/A	#N/A	#N/A	#N/A
2018-02-01 01:00:00	2.4	0.9	1.3	-0.1	#N/A	6	6	2.2	6.3	2.2	#N/A	5.7	5.7	1.8	5.4	1.8	#N/A	#N/A	#N/A	#N/A	#N/A	#N/A	#N/A	#N/A
2018-02-01 02:00:00	2.7	0.9	1.2	-0.1	#N/A	5.8	5.8	2.2	6.3	2.2	#N/A	5.6	5.6	1.8	5.4	1.8	#N/A	#N/A	#N/A	#N/A	#N/A	#N/A	#N/A	#N/A
2018-02-01 03:00:00	1.5	0.9	0.7	-0.1	#N/A	6.3	6.3	2.2	6.3	2.2	#N/A	6	6	1.8	5.4	1.8	#N/A	#N/A	#N/A	#N/A	#N/A	#N/A	#N/A	#N/A
2018-02-01 04:00:00	0.8	0.9	0	-0.1	#N/A	6.6	6.6	2.2	6.3	2.2	#N/A	5.9	5.9	1.8	5.4	1.8	#N/A	#N/A	#N/A	#N/A	#N/A	#N/A	#N/A	#N/A
2018-02-01 05:00:00	0.7	0.9	-0.1	-0.1	#N/A	6.8	6.8	2.2	6.3	2.2	#N/A	5.9	5.9	1.8	5.4	1.8	#N/A	#N/A	#N/A	#N/A	#N/A	#N/A	#N/A	#N/A
2018-02-01 06:00:00	1.2	0.9	0.1	-0.1	#N/A	6.8	6.8	2.2	6.3	2.2	#N/A	5.8	5.8	1.8	5.4	1.8	#N/A	#N/A	#N/A	#N/A	#N/A	#N/A	#N/A	#N/A
2018-02-01 07:00:00	1	0.9	0	-0.1	#N/A	6.9	6.9	2.2	6.3	2.2	#N/A	5.8	5.8	1.8	5.4	1.8	#N/A	#N/A	#N/A	#N/A	#N/A	#N/A	#N/A	#N/A
2018-02-01 08:00:00	0.1	0.9	0	-0.1	#N/A	6.9	6.9	2.2	6.3	2.2	#N/A	5.7	5.7	1.8	5.4	1.8	#N/A	#N/A	#N/A	#N/A	#N/A	#N/A	#N/A	#N/A
2018-02-01 09:00:00	0.1	0.9	0.1	-0.1	#N/A	6.6	6.6	2.2	6.3	2.2	#N/A	5.5	5.5	1.8	5.4	1.8	#N/A	#N/A	#N/A	#N/A	#N/A	#N/A	#N/A	#N/A
2018-02-01 10:00:00	0.6	0.9	0.2	-0.1	#N/A	6.3	6.3	2.2	6.3	2.2	#N/A	5.2	5.2	1.8	5.4	1.8	#N/A	#N/A	#N/A	#N/A	#N/A	#N/A	#N/A	#N/A
2018-02-01 11:00:00	1	0.9	0.3	-0.1	#N/A	6.3	6.3	2.2	6.3	2.2	#N/A	5.2	5.2	1.8	5.4	1.8	#N/A	#N/A	#N/A	#N/A	#N/A	#N/A	#N/A	#N/A
2018-02-01 12:00:00	1.6	0.9	1.2	-0.1	#N/A	6.4	6.4	2.2	6.3	2.2	#N/A	5.2	5.2	1.8	5.4	1.8	#N/A	#N/A	#N/A	#N/A	#N/A	#N/A	#N/A	#N/A
2018-02-01 13:00:00	2	0.9	1	-0.1	#N/A	6.3	6.3	2.2	6.3	2.2	#N/A	5.2	5.2	1.8	5.4	1.8	#N/A	#N/A	#N/A	#N/A	#N/A	#N/A	#N/A	#N/A
2018-02-01 14:00:00	2.4	0.9	0.5	-0.1	#N/A	6	6	2.2	6.3	2.2	#N/A	5.1	5.1	1.8	5.4	1.8	#N/A	#N/A	#N/A	#N/A	#N/A	#N/A	#N/A	#N/A
2018-02-01 15:00:00	2.5	0.9	0.6	-0.1	#N/A	5.9	5.9	2.2	6.3	2.2	#N/A	5.1	5.1	1.8	5.4	1.8	#N/A	#N/A	#N/A	#N/A	#N/A	#N/A	#N/A	#N/A
2018-02-01 16:00:00	2.2	0.9	0.5	-0.1	#N/A	6	6	2.2	6.3	2.2	#N/A	5.1	5.1	1.8	5.4	1.8	#N/A	#N/A	#N/A	#N/A	#N/A	#N/A	#N/A	#N/A
2018-02-01 17:00:00	1	0.9	-0.1	-0.1	#N/A	6.1	6.1	2.2	6.3	2.2	#N/A	5.1	5.1	1.8	5.4	1.8	#N/A	#N/A	#N/A	#N/A	#N/A	#N/A	#N/A	#N/A
2018-02-01 18:00:00	-0.6	0.9	-0.7	-0.1	#N/A	6.2	6.2	2.2	6.3	2.2	#N/A	5.4	5.4	1.8	5.4	1.8	#N/A	#N/A	#N/A	#N/A	#N/A	#N/A	#N/A	#N/A
2018-02-01 19:00:00	-0.7	0.9	-1.3	-0.1	#N/A	6.3	6.3	2.2	6.3	2.2	#N/A	5.3	5.3	1.8	5.4	1.8	#N/A	#N/A	#N/A	#N/A	#N/A	#N/A	#N/A	#N/A
2018-02-01 20:00:00	-0.9	0.9	-1.8	-0.1	#N/A	6.4	6.4	2.2	6.3	2.2	#N/A	5.1	5.1	1.8	5.4	1.8	#N/A	#N/A	#N/A	#N/A	#N/A	#N/A	#N/A	#N/A
2018-02-01 21:00:00	-0.9	0.9	-2.3	-0.1	#N/A	6.4	6.4	2.2	6.3	2.2	#N/A	5.1	5.1	1.8	5.4	1.8	#N/A	#N/A	#N/A	#N/A	#N/A	#N/A	#N/A	#N/A
2018-02-01 22:00:00	-1	0.9	-3	-0.1	#N/A	6.2	6.2	2.2	6.3	2.2	#N/A	5.1	5.1	1.8	5.4	1.8	#N/A	#N/A	#N/A	#N/A	#N/A	#N/A	#N/A	#N/A
2018-02-01 23:00:00	-1.4	0.9	-3.2	-0.1	#N/A	5.8	5.8	2.2	6.3	2.2	#N/A	4.8	4.8	1.8	5.4	1.8	#N/A	#N/A	#N/A	#N/A	#N/A	#N/A	#N/A	#N/A
2018-02-02	-2	-1.2	-4	-3.4	#N/A	5.3	5.3	2.2	4.6	2.2	#N/A	4.5	4.5	1.8	3.3	1.8	#N/A	#N/A	#N/A	#N/A	#N/A	#N/A	#N/A	#N/A
2018-02-02 01:00:00	-2.4	-1.2	-4.5	-3.4	#N/A	5.2	5.2	2.2	4.6	2.2	#N/A	4.3	4.3	1.8	3.3	1.8	#N/A	#N/A	#N/A	#N/A	#N/A	#N/A	#N/A	#N/A
2018-02-02 02:00:00	-3.2	-1.2	-5	-3.4	#N/A	5.1	5.1	2.2	4.6	2.2	#N/A	4.1	4.1	1.8	3.3	1.8	#N/A	#N/A	#N/A	#N/A	#N/A	#N/A	#N/A	#N/A
2018-02-02 03:00:00	-3	-1.2	-6	-3.4	#N/A	5.1	5.1	2.2	4.6	2.2	#N/A	3.9	3.9	1.8	3.3	1.8	#N/A	#N/A	#N/A	#N/A	#N/A	#N/A	#N/A	#N/A
2018-02-02 04:00:00	-3.8	-1.2	-5.8	-3.4	#N/A	5	5	2.2	4.6	2.2	#N/A	3.6	3.6	1.8	3.3	1.8	#N/A	#N/A	#N/A	#N/A	#N/A	#N/A	#N/A	#N/A
2018-02-02 05:00:00	-3.9	-1.2	-6	-3.4	#N/A	4.8	4.8	2.2	4.6	2.2	#N/A	3.4	3.4	1.8	3.3	1.8	#N/A	#N/A	#N/A	#N/A	#N/A	#N/A	#N/A	#N/A
2018-02-02 06:00:00	-4.6	-1.2	-6	-3.4	#N/A	4.6	4.6	2.2	4.6	2.2	#N/A	3.1	3.1	1.8	3.3	1.8	#N/A	#N/A	#N/A	#N/A	#N/A	#N/A	#N/A	#N/A
2018-02-02 07:00:00	-4.5	-1.2	-6.2	-3.4	#N/A	4.4	4.4	2.2	4.6	2.2	#N/A	2.9	2.9	1.8	3.3	1.8	#N/A	#N/A	#N/A	#N/A	#N/A	#N/A	#N/A	#N/A
2018-02-02 08:00:00	-3.7	-1.2	-5.6	-3.4	#N/A	4.1	4.1	2.2	4.6	2.2	#N/A	2.7	2.7	1.8	3.3	1.8	#N/A	#N/A	#N/A	#N/A	#N/A	#N/A	#N/A	#N/A
2018-02-02 09:00:00	-1.6	-1.2	-4.1	-3.4	#N/A	4.1	4.1	2.2	4.6	2.2	#N/A	2.3	2.3	1.8	3.3	1.8	#N/A	#N/A	#N/A	#N/A	#N/A	#N/A	#N/A	#N/A
2018-02-02 10:00:00	0.7	-1.2	-2.7	-3.4	#N/A	3.8	3.8	2.2	4.6	2.2	#N/A	2.3	2.3	1.8	3.3	1.8	#N/A	#N/A	#N/A	#N/A	#N/A	#N/A	#N/A	#N/A
2018-02-02 11:00:00	1.6	-1.2	-0.7	-3.4	#N/A	3.7	3.7	2.2	4.6	2.2	#N/A	2.2	2.2	1.8	3.3	1.8	#N/A	#N/A	#N/A	#N/A	#N/A	#N/A	#N/A	#N/A
2018-02-02 12:00:00	1.8	-1.2	0.6	-3.4	#N/A	3.5	3.5	2.2	4.6	2.2	#N/A	2.2	2.2	1.8	3.3	1.8	#N/A	#N/A	#N/A	#N/A	#N/A	#N/A	#N/A	#N/A
2018-02-02 13:00:00	2.6	-1.2	1.1	-3.4	#N/A	3.5	3.5	2.2	4.6	2.2	#N/A	2.1	2.1	1.8	3.3	1.8	#N/A	#N/A	#N/A	#N/A	#N/A	#N/A	#N/A	#N/A
2018-02-02 14:00:00	2.9	-1.2	1.2	-3.4	#N/A	3.7	3.7	2.2	4.6	2.2	#N/A	2.3	2.3	1.8	3.3	1.8	#N/A	#N/A	#N/A	#N/A	#N/A	#N/A	#N/A	#N/A
2018-02-02 15:00:00	2.5	-1.2	0.5	-3.4	#N/A	4.3	4.3	2.2	4.6	2.2	#N/A	2.7	2.7	1.8	3.3	1.8	#N/A	#N/A	#N/A	#N/A	#N/A	#N/A	#N/A	#N/A
2018-02-02 16:00:00	2	-1.2	-0.5	-3.4	#N/A	4.9	4.9	2.2	4.6	2.2	#N/A	3.2	3.2	1.8	3.3	1.8	#N/A	#N/A	#N/A	#N/A	#N/A	#N/A	#N/A	#N/A
2018-02-02 17:00:00	0.4	-1.2	-1.8	-3.4	#N/A	5.1	5.1	2.2	4.6	2.2	#N/A	3.9	3.9	1.8	3.3	1.8	#N/A	#N/A	#N/A	#N/A	#N/A	#N/A	#N/A	#N/A
2018-02-02 18:00:00	-0.8	-1.2	-3	-3.4	#N/A	5.1	5.1	2.2	4.6	2.2	#N/A	4.3	4.3	1.8	3.3	1.8	#N/A	#N/A	#N/A	#N/A	#N/A	#N/A	#N/A	#N/A
2018-02-02 19:00:00	-1.4	-1.2	-3.7	-3.4	#N/A	5.3	5.3	2.2	4.6	2.2	#N/A	4.5	4.5	1.8	3.3	1.8	#N/A	#N/A	#N/A	#N/A	#N/A	#N/A	#N/A	#N/A
2018-02-02 20:00:00	-1.4	-1.2	-4	-3.4	#N/A	5.3	5.3	2.2	4.6	2.2	#N/A	4.5	4.5	1.8	3.3	1.8	#N/A	#N/A	#N/A	#N/A	#N/A	#N/A	#N/A	#N/A
2018-02-02 21:00:00	-2	-1.2	-4.6	-3.4	#N/A	5.2	5.2	2.2	4.6	2.2	#N/A	4.2	4.2	1.8	3.3	1.8	#N/A	#N/A	#N/A	#N/A	#N/A	#N/A	#N/A	#N/A
2018-02-02 22:00:00	-2.1	-1.2	-5.1	-3.4	#N/A	5	5	2.2	4.6	2.2	#N/A	3.8	3.8	1.8	3.3	1.8	#N/A	#N/A	#N/A	#N/A	#N/A	#N/A	#N/A	#N/A
2018-02-02 23:00:00	-2.2	-1.2	-5.3	-3.4	#N/A	4.5	4.5	2.2	4.6	2.2	#N/A	3.3	3.3	1.8	3.3	1.8	#N/A	#N/A	#N/A	#N/A	#N/A	#N/A	#N/A	#N/A
2018-02-03	-3.1	-1.4	-5.9	-3.3	#N/A	4.1	4.1	2.2	3.6	2.2	#N/A	2.8	2.8	1.8	2.3	1.8	#N/A	#N/A	#N/A	#N/A	#N/A	#N/A	#N/A	#N/A
2018-02-03 01:00:00	-3.2	-1.4	-6.2	-3.3	#N/A	3.8	3.8	2.2	3.6	2.2	#N/A	2.5	2.5	1.8	2.3	1.8	#N/A	#N/A	#N/A	#N/A	#N/A	#N/A	#N/A	#N/A
2018-02-03 02:00:00	-3.9	-1.4	-6.4	-3.3	#N/A	3.8	3.8	2.2	3.6	2.2	#N/A	2.3	2.3	1.8	2.3	1.8	#N/A	#N/A	#N/A	#N/A	#N/A	#N/A	#N/A	#N/A
2018-02-03 03:00:00	-5.1	-1.4	-7.1	-3.3	#N/A	3.6	3.6	2.2	3.6	2.2	#N/A	2.1	2.1	1.8	2.3	1.8	#N/A	#N/A	#N/A	#N/A	#N/A	#N/A	#N/A	#N/A
2018-02-03 04:00:00	-4.4	-1.4	-7.4	-3.3	#N/A	3.5	3.5	2.2	3.6	2.2	#N/A	1.8	1.8	1.8	2.3	1.8	#N/A	#N/A	#N/A	#N/A	#N/A	#N/A	#N/A	#N/A
2018-02-03 05:00:00	-4.4	-1.4	-7.3	-3.3	#N/A	3.4	3.4	2.2	3.6	2.2	#N/A	1.7	1.7	1.8	2.3	1.8	#N/A	#N/A	#N/A	#N/A	#N/A	#N/A	#N/A	#N/A
2018-02-03 06:00:00	-5	-1.4	-7.4	-3.3	#N/A	3.1	3.1	2.2	3.6	2.2	#N/A	1.4	1.4	1.8	2.3	1.8	#N/A	#N/A	#N/A	#N/A	#N/A	#N/A	#N/A	#N/A
2018-02-03 07:00:00	-4.6	-1.4	-7.9	-3.3	#N/A	3	3	2.2	3.6	2.2	#N/A	1.3	1.3	1.8	2.3	1.8	#N/A	#N/A	#N/A	#N/A	#N/A	#N/A	#N/A	#N/A
2018-02-03 08:00:00	-4.7	-1.4	-7.5	-3.3	#N/A	2.8	2.8	2.2	3.6	2.2	#N/A	1.2	1.2	1.8	2.3	1.8	#N/A	#N/A	#N/A	#N/A	#N/A	#N/A	#N/A	#N/A
2018-02-03 09:00:00	-0.3	-1.4	-7.1	-3.3	#N/A	2.4	2.4	2.2	3.6	2.2	#N/A	0.9	0.9	1.8	2.3	1.8	#N/A	#N/A	#N/A	#N/A	#N/A	#N/A	#N/A	#N/A
2018-02-03 10:00:00	1.9	-1.4	-5.3	-3.3	#N/A	2.6	2.6	2.2	3.6	2.2	#N/A	0.7	0.7	1.8	2.3	1.8	#N/A	#N/A	#N/A	#N/A	#N/A	#N/A	#N/A	#N/A
2018-02-03 11:00:00	3.6	-1.4	1.8	-3.3	#N/A	2.5	2.5	2.2	3.6	2.2	#N/A	0.8	0.8	1.8	2.3	1.8	#N/A	#N/A	#N/A	#N/A	#N/A	#N/A	#N/A	#N/A
2018-02-03 12:00:00	4	-1.4	4.2	-3.3	#N/A	2.3	2.3	2.2	3.6	2.2	#N/A	0.7	0.7	1.8	2.3	1.8	#N/A	#N/A	#N/A	#N/A	#N/A	#N/A	#N/A	#N/A
2018-02-03 13:00:00	4.7	-1.4	5.3	-3.3	#N/A	2.4	2.4	2.2	3.6	2.2	#N/A	0.5	0.5	1.8	2.3	1.8	#N/A	#N/A	#N/A	#N/A	#N/A	#N/A	#N/A	#N/A
2018-02-03 14:00:00	5.1	-1.4	5.5	-3.3	#N/A	2.4	2.4	2.2	3.6	2.2	#N/A	0.6	0.6	1.8	2.3	1.8	#N/A	#N/A	#N/A	#N/A	#N/A	#N/A	#N/A	#N/A
2018-02-03 15:00:00	4.8	-1.4	4.5	-3.3	#N/A	3.6	3.6	2.2	3.6	2.2	#N/A	0.7	0.7	1.8	2.3	1.8	#N/A	#N/A	#N/A	#N/A	#N/A	#N/A	#N/A	#N/A
2018-02-03 16:00:00	4.2	-1.4	4	-3.3	#N/A	4.3	4.3	2.2	3.6	2.2	#N/A	1.4	1.4	1.8	2.3	1.8	#N/A	#N/A	#N/A	#N/A	#N/A	#N/A	#N/A	#N/A
2018-02-03 17:00:00	-0.7	-1.4	1.1	-3.3	#N/A	4.7	4.7	2.2	3.6	2.2	#N/A	3.9	3.9	1.8	2.3	1.8	#N/A	#N/A	#N/A	#N/A	#N/A	#N/A	#N/A	#N/A
2018-02-03 18:00:00	-2.2	-1.4	-2.8	-3.3	#N/A	4.8	4.8	2.2	3.6	2.2	#N/A	4.7	4.7	1.8	2.3	1.8	#N/A	#N/A	#N/A	#N/A	#N/A	#N/A	#N/A	#N/A
2018-02-03 19:00:00	-2.9	-1.4	-4.2	-3.3	#N/A	5	5	2.2	3.6	2.2	#N/A	5.1	5.1	1.8	2.3	1.8	#N/A	#N/A	#N/A	#N/A	#N/A	#N/A	#N/A	#N/A
2018-02-03 20:00:00	-3.7	-1.4	-5.4	-3.3	#N/A	5.1	5.1	2.2	3.6	2.2	#N/A	5.1	5.1	1.8	2.3	1.8	#N/A	#N/A	#N/A	#N/A	#N/A	#N/A	#N/A	#N/A
2018-02-03 21:00:00	-4.3	-1.4	-5.9	-3.3	#N/A	5	5	2.2	3.6	2.2	#N/A	4.7	4.7	1.8	2.3	1.8	#N/A	#N/A	#N/A	#N/A	#N/A	#N/A	#N/A	#N/A
2018-02-03 22:00:00	-4.7	-1.4	-6	-3.3	#N/A	4.8	4.8	2.2	3.6	2.2	#N/A	4.5	4.5	1.8	2.3	1.8	#N/A	#N/A	#N/A	#N/A	#N/A	#N/A	#N/A	#N/A
2018-02-03 23:00:00	-5	-1.4	-6.6	-3.3	#N/A	3.3	3.3	2.2	3.6	2.2	#N/A	3.4	3.4	1.8	2.3	1.8	#N/A	#N/A	#N/A	#N/A	#N/A	#N/A	#N/A	#N/A
2018-02-04	-6	-0.9	-7.1	-1.6	#N/A	2.8	2.8	2.2	2.6	2.2	#N/A	2	2	1.8	1.7	1.8	#N/A	#N/A	#N/A	#N/A	#N/A	#N/A	#N/A	#N/A
2018-02-04 01:00:00	-6.6	-0.9	-7.5	-1.6	#N/A	2.6	2.6	2.2	2.6	2.2	#N/A	1.4	1.4	1.8	1.7	1.8	#N/A	#N/A	#N/A	#N/A	#N/A	#N/A	#N/A	#N/A
2018-02-04 02:00:00	-7.2	-0.9	-7.3	-1.6	#N/A	2.3	2.3	2.2	2.6	2.2	#N/A	1	1	1.8	1.7	1.8	#N/A	#N/A	#N/A	#N/A	#N/A	#N/A	#N/A	#N/A
2018-02-04 03:00:00	-7.5	-0.9	-7.5	-1.6	#N/A	2.1	2.1	2.2	2.6	2.2	#N/A	0.8	0.8	1.8	1.7	1.8	#N/A	#N/A	#N/A	#N/A	#N/A	#N/A	#N/A	#N/A
2018-02-04 04:00:00	-7.4	-0.9	-6.7	-1.6	#N/A	1.9	1.9	2.2	2.6	2.2	#N/A	0.7	0.7	1.8	1.7	1.8	#N/A	#N/A	#N/A	#N/A	#N/A	#N/A	#N/A	#N/A
2018-02-04 05:00:00	-6.4	-0.9	-6.2	-1.6	#N/A	1.8	1.8	2.2	2.6	2.2	#N/A	0.5	0.5	1.8	1.7	1.8	#N/A	#N/A	#N/A	#N/A	#N/A	#N/A	#N/A	#N/A
2018-02-04 06:00:00	-6	-0.9	-5.5	-1.6	#N/A	1.5	1.5	2.2	2.6	2.2	#N/A	0.3	0.3	1.8	1.7	1.8	#N/A	#N/A	#N/A	#N/A	#N/A	#N/A	#N/A	#N/A
2018-02-04 07:00:00	-6.4	-0.9	-5.5	-1.6	#N/A	1.3	1.3	2.2	2.6	2.2	#N/A	0.1	0.1	1.8	1.7	1.8	#N/A	#N/A	#N/A	#N/A	#N/A	#N/A	#N/A	#N/A
2018-02-04 08:00:00	-6.5	-0.9	-5.9	-1.6	#N/A	1.1	1.1	2.2	2.6	2.2	#N/A	0.1	0.1	1.8	1.7	1.8	#N/A	#N/A	#N/A	#N/A	#N/A	#N/A	#N/A	#N/A
2018-02-04 09:00:00	-2.1	-0.9	-5	-1.6	#N/A	1	1	2.2	2.6	2.2	#N/A	0	0	1.8	1.7	1.8	#N/A	#N/A	#N/A	#N/A	#N/A	#N/A	#N/A	#N/A
2018-02-04 10:00:00	2.1	-0.9	-1.7	-1.6	#N/A	1	1	2.2	2.6	2.2	#N/A	0.3	0.3	1.8	1.7	1.8	#N/A	#N/A	#N/A	#N/A	#N/A	#N/A	#N/A	#N/A
2018-02-04 11:00:00	4.3	-0.9	4.2	-1.6	#N/A	1.2	1.2	2.2	2.6	2.2	#N/A	0.5	0.5	1.8	1.7	1.8	#N/A	#N/A	#N/A	#N/A	#N/A	#N/A	#N/A	#N/A
2018-02-04 12:00:00	5.4	-0.9	4.3	-1.6	#N/A	1.3	1.3	2.2	2.6	2.2	#N/A	0.7	0.7	1.8	1.7	1.8	#N/A	#N/A	#N/A	#N/A	#N/A	#N/A	#N/A	#N/A
2018-02-04 13:00:00	6.2	-0.9	5.3	-1.6	#N/A	1.2	1.2	2.2	2.6	2.2	#N/A	0.7	0.7	1.8	1.7	1.8	#N/A	#N/A	#N/A	#N/A	#N/A	#N/A	#N/A	#N/A
2018-02-04 14:00:00	7.2	-0.9	5.7	-1.6	#N/A	1.1	1.1	2.2	2.6	2.2	#N/A	0.5	0.5	1.8	1.7	1.8	#N/A	#N/A	#N/A	#N/A	#N/A	#N/A	#N/A	#N/A
2018-02-04 15:00:00	6.7	-0.9	5.6	-1.6	#N/A	2.4	2.4	2.2	2.6	2.2	#N/A	0.8	0.8	1.8	1.7	1.8	#N/A	#N/A	#N/A	#N/A	#N/A	#N/A	#N/A	#N/A
2018-02-04 16:00:00	4.7	-0.9	4.3	-1.6	#N/A	3.6	3.6	2.2	2.6	2.2	#N/A	1.9	1.9	1.8	1.7	1.8	#N/A	#N/A	#N/A	#N/A	#N/A	#N/A	#N/A	#N/A
2018-02-04 17:00:00	3.5	-0.9	1.7	-1.6	#N/A	4.3	4.3	2.2	2.6	2.2	#N/A	4	4	1.8	1.7	1.8	#N/A	#N/A	#N/A	#N/A	#N/A	#N/A	#N/A	#N/A
2018-02-04 18:00:00	2.3	-0.9	1	-1.6	#N/A	4.6	4.6	2.2	2.6	2.2	#N/A	4.1	4.1	1.8	1.7	1.8	#N/A	#N/A	#N/A	#N/A	#N/A	#N/A	#N/A	#N/A
2018-02-04 19:00:00	1.4	-0.9	0.5	-1.6	#N/A	4.8	4.8	2.2	2.6	2.2	#N/A	4.4	4.4	1.8	1.7	1.8	#N/A	#N/A	#N/A	#N/A	#N/A	#N/A	#N/A	#N/A
2018-02-04 20:00:00	0.7	-0.9	-0.3	-1.6	#N/A	5.2	5.2	2.2	2.6	2.2	#N/A	4.5	4.5	1.8	1.7	1.8	#N/A	#N/A	#N/A	#N/A	#N/A	#N/A	#N/A	#N/A
2018-02-04 21:00:00	-0.8	-0.9	-0.5	-1.6	#N/A	5	5	2.2	2.6	2.2	#N/A	4.5	4.5	1.8	1.7	1.8	#N/A	#N/A	#N/A	#N/A	#N/A	#N/A	#N/A	#N/A
2018-02-04 22:00:00	-1.6	-0.9	-1.1	-1.6	#N/A	4.4	4.4	2.2	2.6	2.2	#N/A	4	4	1.8	1.7	1.8	#N/A	#N/A	#N/A	#N/A	#N/A	#N/A	#N/A	#N/A
2018-02-04 23:00:00	-1.8	-0.9	-2	-1.6	#N/A	4	4	2.2	2.6	2.2	#N/A	3	3	1.8	1.7	1.8	#N/A	#N/A	#N/A	#N/A	#N/A	#N/A	#N/A	#N/A
2018-02-05	-1.6	2.1	-2.1	0.8	#N/A	3.7	3.7	2.2	3.5	2.2	#N/A	2.8	2.8	1.8	2.5	1.8	#N/A	#N/A	#N/A	#N/A	#N/A	#N/A	#N/A	#N/A
2018-02-05 01:00:00	-1.5	2.1	-1.6	0.8	#N/A	3.4	3.4	2.2	3.5	2.2	#N/A	2.6	2.6	1.8	2.5	1.8	#N/A	#N/A	#N/A	#N/A	#N/A	#N/A	#N/A	#N/A
2018-02-05 02:00:00	-1	2.1	-0.8	0.8	#N/A	3.2	3.2	2.2	3.5	2.2	#N/A	2.3	2.3	1.8	2.5	1.8	#N/A	#N/A	#N/A	#N/A	#N/A	#N/A	#N/A	#N/A
2018-02-05 03:00:00	-0.4	2.1	-0.5	0.8	#N/A	2.8	2.8	2.2	3.5	2.2	#N/A	2.2	2.2	1.8	2.5	1.8	#N/A	#N/A	#N/A	#N/A	#N/A	#N/A	#N/A	#N/A
2018-02-05 04:00:00	-0.1	2.1	-0.7	0.8	#N/A	2.5	2.5	2.2	3.5	2.2	#N/A	2	2	1.8	2.5	1.8	#N/A	#N/A	#N/A	#N/A	#N/A	#N/A	#N/A	#N/A
2018-02-05 05:00:00	-0.3	2.1	-1.1	0.8	#N/A	2.5	2.5	2.2	3.5	2.2	#N/A	1.7	1.7	1.8	2.5	1.8	#N/A	#N/A	#N/A	#N/A	#N/A	#N/A	#N/A	#N/A
2018-02-05 06:00:00	-0.2	2.1	-1.1	0.8	#N/A	2.6	2.6	2.2	3.5	2.2	#N/A	1.6	1.6	1.8	2.5	1.8	#N/A	#N/A	#N/A	#N/A	#N/A	#N/A	#N/A	#N/A
2018-02-05 07:00:00	-0.2	2.1	-1	0.8	#N/A	2.6	2.6	2.2	3.5	2.2	#N/A	1.8	1.8	1.8	2.5	1.8	#N/A	#N/A	#N/A	#N/A	#N/A	#N/A	#N/A	#N/A
2018-02-05 08:00:00	0.3	2.1	-0.7	0.8	#N/A	2.8	2.8	2.2	3.5	2.2	#N/A	2.1	2.1	1.8	2.5	1.8	#N/A	#N/A	#N/A	#N/A	#N/A	#N/A	#N/A	#N/A
2018-02-05 09:00:00	1.8	2.1	0.1	0.8	#N/A	2.9	2.9	2.2	3.5	2.2	#N/A	2.2	2.2	1.8	2.5	1.8	#N/A	#N/A	#N/A	#N/A	#N/A	#N/A	#N/A	#N/A
2018-02-05 10:00:00	4.4	2.1	1.7	0.8	#N/A	3	3	2.2	3.5	2.2	#N/A	2.1	2.1	1.8	2.5	1.8	#N/A	#N/A	#N/A	#N/A	#N/A	#N/A	#N/A	#N/A
2018-02-05 11:00:00	6.3	2.1	2	0.8	#N/A	2.9	2.9	2.2	3.5	2.2	#N/A	1.9	1.9	1.8	2.5	1.8	#N/A	#N/A	#N/A	#N/A	#N/A	#N/A	#N/A	#N/A
2018-02-05 12:00:00	6.8	2.1	3.9	0.8	#N/A	2.9	2.9	2.2	3.5	2.2	#N/A	1.9	1.9	1.8	2.5	1.8	#N/A	#N/A	#N/A	#N/A	#N/A	#N/A	#N/A	#N/A
2018-02-05 13:00:00	6.5	2.1	4.8	0.8	#N/A	2.9	2.9	2.2	3.5	2.2	#N/A	1.9	1.9	1.8	2.5	1.8	#N/A	#N/A	#N/A	#N/A	#N/A	#N/A	#N/A	#N/A
2018-02-05 14:00:00	6.6	2.1	4.9	0.8	#N/A	3	3	2.2	3.5	2.2	#N/A	1.9	1.9	1.8	2.5	1.8	#N/A	#N/A	#N/A	#N/A	#N/A	#N/A	#N/A	#N/A
2018-02-05 15:00:00	5.7	2.1	4	0.8	#N/A	3.4	3.4	2.2	3.5	2.2	#N/A	2.2	2.2	1.8	2.5	1.8	#N/A	#N/A	#N/A	#N/A	#N/A	#N/A	#N/A	#N/A
2018-02-05 16:00:00	5.3	2.1	3.1	0.8	#N/A	4.2	4.2	2.2	3.5	2.2	#N/A	2.7	2.7	1.8	2.5	1.8	#N/A	#N/A	#N/A	#N/A	#N/A	#N/A	#N/A	#N/A
2018-02-05 17:00:00	4.1	2.1	2.4	0.8	#N/A	4.8	4.8	2.2	3.5	2.2	#N/A	2.8	2.8	1.8	2.5	1.8	#N/A	#N/A	#N/A	#N/A	#N/A	#N/A	#N/A	#N/A
2018-02-05 18:00:00	3.5	2.1	1.5	0.8	#N/A	4.9	4.9	2.2	3.5	2.2	#N/A	3.5	3.5	1.8	2.5	1.8	#N/A	#N/A	#N/A	#N/A	#N/A	#N/A	#N/A	#N/A
2018-02-05 19:00:00	1.9	2.1	0.5	0.8	#N/A	4.8	4.8	2.2	3.5	2.2	#N/A	3.8	3.8	1.8	2.5	1.8	#N/A	#N/A	#N/A	#N/A	#N/A	#N/A	#N/A	#N/A
2018-02-05 20:00:00	1	2.1	0.3	0.8	#N/A	4.9	4.9	2.2	3.5	2.2	#N/A	3.8	3.8	1.8	2.5	1.8	#N/A	#N/A	#N/A	#N/A	#N/A	#N/A	#N/A	#N/A
2018-02-05 21:00:00	0.3	2.1	0.3	0.8	#N/A	4.6	4.6	2.2	3.5	2.2	#N/A	3.5	3.5	1.8	2.5	1.8	#N/A	#N/A	#N/A	#N/A	#N/A	#N/A	#N/A	#N/A
2018-02-05 22:00:00	0.3	2.1	0.2	0.8	#N/A	4.5	4.5	2.2	3.5	2.2	#N/A	3.1	3.1	1.8	2.5	1.8	#N/A	#N/A	#N/A	#N/A	#N/A	#N/A	#N/A	#N/A
2018-02-05 23:00:00	0.9	2.1	-0.1	0.8	#N/A	4.1	4.1	2.2	3.5	2.2	#N/A	2.9	2.9	1.8	2.5	1.8	#N/A	#N/A	#N/A	#N/A	#N/A	#N/A	#N/A	#N/A
2018-02-06	0.1	2.6	0.3	1.7	#N/A	4	4	2.2	3.7	2.2	#N/A	2.5	2.5	1.8	2.5	1.8	#N/A	#N/A	#N/A	#N/A	#N/A	#N/A	#N/A	#N/A
2018-02-06 01:00:00	0.9	2.6	0.9	1.7	#N/A	3.5	3.5	2.2	3.7	2.2	#N/A	2.2	2.2	1.8	2.5	1.8	#N/A	#N/A	#N/A	#N/A	#N/A	#N/A	#N/A	#N/A
2018-02-06 02:00:00	1.8	2.6	0.9	1.7	#N/A	3.3	3.3	2.2	3.7	2.2	#N/A	2.1	2.1	1.8	2.5	1.8	#N/A	#N/A	#N/A	#N/A	#N/A	#N/A	#N/A	#N/A
2018-02-06 03:00:00	0.7	2.6	0	1.7	#N/A	3.1	3.1	2.2	3.7	2.2	#N/A	2.1	2.1	1.8	2.5	1.8	#N/A	#N/A	#N/A	#N/A	#N/A	#N/A	#N/A	#N/A
2018-02-06 04:00:00	-0.2	2.6	-1	1.7	#N/A	3.1	3.1	2.2	3.7	2.2	#N/A	2.1	2.1	1.8	2.5	1.8	#N/A	#N/A	#N/A	#N/A	#N/A	#N/A	#N/A	#N/A
2018-02-06 05:00:00	-0.3	2.6	-0.8	1.7	#N/A	3.3	3.3	2.2	3.7	2.2	#N/A	2	2	1.8	2.5	1.8	#N/A	#N/A	#N/A	#N/A	#N/A	#N/A	#N/A	#N/A
2018-02-06 06:00:00	-1	2.6	-0.5	1.7	#N/A	3.1	3.1	2.2	3.7	2.2	#N/A	2.1	2.1	1.8	2.5	1.8	#N/A	#N/A	#N/A	#N/A	#N/A	#N/A	#N/A	#N/A
2018-02-06 07:00:00	-0.9	2.6	-0.7	1.7	#N/A	3.3	3.3	2.2	3.7	2.2	#N/A	2.3	2.3	1.8	2.5	1.8	#N/A	#N/A	#N/A	#N/A	#N/A	#N/A	#N/A	#N/A
2018-02-06 08:00:00	-0.4	2.6	-0.1	1.7	#N/A	3.6	3.6	2.2	3.7	2.2	#N/A	2.3	2.3	1.8	2.5	1.8	#N/A	#N/A	#N/A	#N/A	#N/A	#N/A	#N/A	#N/A
2018-02-06 09:00:00	1.7	2.6	1.1	1.7	#N/A	3.3	3.3	2.2	3.7	2.2	#N/A	2	2	1.8	2.5	1.8	#N/A	#N/A	#N/A	#N/A	#N/A	#N/A	#N/A	#N/A
2018-02-06 10:00:00	4.2	2.6	2.7	1.7	#N/A	3	3	2.2	3.7	2.2	#N/A	1.7	1.7	1.8	2.5	1.8	#N/A	#N/A	#N/A	#N/A	#N/A	#N/A	#N/A	#N/A
2018-02-06 11:00:00	4.2	2.6	3.3	1.7	#N/A	3	3	2.2	3.7	2.2	#N/A	1.7	1.7	1.8	2.5	1.8	#N/A	#N/A	#N/A	#N/A	#N/A	#N/A	#N/A	#N/A
2018-02-06 12:00:00	5.7	2.6	3	1.7	#N/A	2.8	2.8	2.2	3.7	2.2	#N/A	1.8	1.8	1.8	2.5	1.8	#N/A	#N/A	#N/A	#N/A	#N/A	#N/A	#N/A	#N/A
2018-02-06 13:00:00	6.4	2.6	4.4	1.7	#N/A	2.7	2.7	2.2	3.7	2.2	#N/A	1.7	1.7	1.8	2.5	1.8	#N/A	#N/A	#N/A	#N/A	#N/A	#N/A	#N/A	#N/A
2018-02-06 14:00:00	7.3	2.6	5.7	1.7	#N/A	2.9	2.9	2.2	3.7	2.2	#N/A	1.9	1.9	1.8	2.5	1.8	#N/A	#N/A	#N/A	#N/A	#N/A	#N/A	#N/A	#N/A
2018-02-06 15:00:00	8.4	2.6	6.4	1.7	#N/A	3.5	3.5	2.2	3.7	2.2	#N/A	2.3	2.3	1.8	2.5	1.8	#N/A	#N/A	#N/A	#N/A	#N/A	#N/A	#N/A	#N/A
2018-02-06 16:00:00	6.5	2.6	5.8	1.7	#N/A	4.2	4.2	2.2	3.7	2.2	#N/A	2.8	2.8	1.8	2.5	1.8	#N/A	#N/A	#N/A	#N/A	#N/A	#N/A	#N/A	#N/A
2018-02-06 17:00:00	5.5	2.6	3.8	1.7	#N/A	4.2	4.2	2.2	3.7	2.2	#N/A	3.1	3.1	1.8	2.5	1.8	#N/A	#N/A	#N/A	#N/A	#N/A	#N/A	#N/A	#N/A
2018-02-06 18:00:00	4.2	2.6	2.9	1.7	#N/A	4.7	4.7	2.2	3.7	2.2	#N/A	3	3	1.8	2.5	1.8	#N/A	#N/A	#N/A	#N/A	#N/A	#N/A	#N/A	#N/A
2018-02-06 19:00:00	1.6	2.6	1.4	1.7	#N/A	4.9	4.9	2.2	3.7	2.2	#N/A	3.4	3.4	1.8	2.5	1.8	#N/A	#N/A	#N/A	#N/A	#N/A	#N/A	#N/A	#N/A
2018-02-06 20:00:00	0.7	2.6	0.3	1.7	#N/A	5.2	5.2	2.2	3.7	2.2	#N/A	3.9	3.9	1.8	2.5	1.8	#N/A	#N/A	#N/A	#N/A	#N/A	#N/A	#N/A	#N/A
2018-02-06 21:00:00	1.4	2.6	0.7	1.7	#N/A	5.5	5.5	2.2	3.7	2.2	#N/A	4.2	4.2	1.8	2.5	1.8	#N/A	#N/A	#N/A	#N/A	#N/A	#N/A	#N/A	#N/A
2018-02-06 22:00:00	1.8	2.6	0.7	1.7	#N/A	4.9	4.9	2.2	3.7	2.2	#N/A	3.9	3.9	1.8	2.5	1.8	#N/A	#N/A	#N/A	#N/A	#N/A	#N/A	#N/A	#N/A
2018-02-06 23:00:00	1.6	2.6	0	1.7	#N/A	4.6	4.6	2.2	3.7	2.2	#N/A	3.2	3.2	1.8	2.5	1.8	#N/A	#N/A	#N/A	#N/A	#N/A	#N/A	#N/A	#N/A
2018-02-07	0.7	0.6	-0.4	-0.3	#N/A	4.2	4.2	2.2	3.3	2.2	#N/A	2.9	2.9	1.8	1.9	1.8	#N/A	#N/A	#N/A	#N/A	#N/A	#N/A	#N/A	#N/A
2018-02-07 01:00:00	0.3	0.6	-0.6	-0.3	#N/A	3.4	3.4	2.2	3.3	2.2	#N/A	2.3	2.3	1.8	1.9	1.8	#N/A	#N/A	#N/A	#N/A	#N/A	#N/A	#N/A	#N/A
2018-02-07 02:00:00	0.1	0.6	-1	-0.3	#N/A	3.1	3.1	2.2	3.3	2.2	#N/A	1.9	1.9	1.8	1.9	1.8	#N/A	#N/A	#N/A	#N/A	#N/A	#N/A	#N/A	#N/A
2018-02-07 03:00:00	-1.7	0.6	-1.9	-0.3	#N/A	3.3	3.3	2.2	3.3	2.2	#N/A	2	2	1.8	1.9	1.8	#N/A	#N/A	#N/A	#N/A	#N/A	#N/A	#N/A	#N/A
2018-02-07 04:00:00	-2.3	0.6	-3	-0.3	#N/A	3.4	3.4	2.2	3.3	2.2	#N/A	2	2	1.8	1.9	1.8	#N/A	#N/A	#N/A	#N/A	#N/A	#N/A	#N/A	#N/A
2018-02-07 05:00:00	-2.8	0.6	-3.8	-0.3	#N/A	3.3	3.3	2.2	3.3	2.2	#N/A	1.8	1.8	1.8	1.9	1.8	#N/A	#N/A	#N/A	#N/A	#N/A	#N/A	#N/A	#N/A
2018-02-07 06:00:00	-3.6	0.6	-4.4	-0.3	#N/A	3	3	2.2	3.3	2.2	#N/A	1.6	1.6	1.8	1.9	1.8	#N/A	#N/A	#N/A	#N/A	#N/A	#N/A	#N/A	#N/A
2018-02-07 07:00:00	-4.1	0.6	-4.9	-0.3	#N/A	2.9	2.9	2.2	3.3	2.2	#N/A	1.5	1.5	1.8	1.9	1.8	#N/A	#N/A	#N/A	#N/A	#N/A	#N/A	#N/A	#N/A
2018-02-07 08:00:00	-3.7	0.6	-4.9	-0.3	#N/A	2.8	2.8	2.2	3.3	2.2	#N/A	1.3	1.3	1.8	1.9	1.8	#N/A	#N/A	#N/A	#N/A	#N/A	#N/A	#N/A	#N/A
2018-02-07 09:00:00	0.3	0.6	-4.3	-0.3	#N/A	2.2	2.2	2.2	3.3	2.2	#N/A	1	1	1.8	1.9	1.8	#N/A	#N/A	#N/A	#N/A	#N/A	#N/A	#N/A	#N/A
2018-02-07 10:00:00	2.7	0.6	-2.3	-0.3	#N/A	2.1	2.1	2.2	3.3	2.2	#N/A	0.6	0.6	1.8	1.9	1.8	#N/A	#N/A	#N/A	#N/A	#N/A	#N/A	#N/A	#N/A
2018-02-07 11:00:00	6.1	0.6	4.3	-0.3	#N/A	1.9	1.9	2.2	3.3	2.2	#N/A	0.3	0.3	1.8	1.9	1.8	#N/A	#N/A	#N/A	#N/A	#N/A	#N/A	#N/A	#N/A
2018-02-07 12:00:00	6.6	0.6	6.7	-0.3	#N/A	1.7	1.7	2.2	3.3	2.2	#N/A	0.1	0.1	1.8	1.9	1.8	#N/A	#N/A	#N/A	#N/A	#N/A	#N/A	#N/A	#N/A
2018-02-07 13:00:00	7.6	0.6	7.5	-0.3	#N/A	1.5	1.5	2.2	3.3	2.2	#N/A	-0.1	-0.1	1.8	1.9	1.8	#N/A	#N/A	#N/A	#N/A	#N/A	#N/A	#N/A	#N/A
2018-02-07 14:00:00	7.6	0.6	8.2	-0.3	#N/A	1.6	1.6	2.2	3.3	2.2	#N/A	-0.1	-0.1	1.8	1.9	1.8	#N/A	#N/A	#N/A	#N/A	#N/A	#N/A	#N/A	#N/A
2018-02-07 15:00:00	8	0.6	7.2	-0.3	#N/A	2.8	2.8	2.2	3.3	2.2	#N/A	0.1	0.1	1.8	1.9	1.8	#N/A	#N/A	#N/A	#N/A	#N/A	#N/A	#N/A	#N/A
2018-02-07 16:00:00	6.7	0.6	6.2	-0.3	#N/A	3.6	3.6	2.2	3.3	2.2	#N/A	0.8	0.8	1.8	1.9	1.8	#N/A	#N/A	#N/A	#N/A	#N/A	#N/A	#N/A	#N/A
2018-02-07 17:00:00	1.9	0.6	3.5	-0.3	#N/A	4.6	4.6	2.2	3.3	2.2	#N/A	3.2	3.2	1.8	1.9	1.8	#N/A	#N/A	#N/A	#N/A	#N/A	#N/A	#N/A	#N/A
2018-02-07 18:00:00	-0.4	0.6	-0.3	-0.3	#N/A	4.7	4.7	2.2	3.3	2.2	#N/A	4	4	1.8	1.9	1.8	#N/A	#N/A	#N/A	#N/A	#N/A	#N/A	#N/A	#N/A
2018-02-07 19:00:00	-2.2	0.6	-2.3	-0.3	#N/A	5	5	2.2	3.3	2.2	#N/A	4.3	4.3	1.8	1.9	1.8	#N/A	#N/A	#N/A	#N/A	#N/A	#N/A	#N/A	#N/A
2018-02-07 20:00:00	-3.1	0.6	-3.3	-0.3	#N/A	5	5	2.2	3.3	2.2	#N/A	4.5	4.5	1.8	1.9	1.8	#N/A	#N/A	#N/A	#N/A	#N/A	#N/A	#N/A	#N/A
2018-02-07 21:00:00	-3.3	0.6	-4.1	-0.3	#N/A	5	5	2.2	3.3	2.2	#N/A	4.1	4.1	1.8	1.9	1.8	#N/A	#N/A	#N/A	#N/A	#N/A	#N/A	#N/A	#N/A
2018-02-07 22:00:00	-3.6	0.6	-4.7	-0.3	#N/A	4.6	4.6	2.2	3.3	2.2	#N/A	3.8	3.8	1.8	1.9	1.8	#N/A	#N/A	#N/A	#N/A	#N/A	#N/A	#N/A	#N/A
2018-02-07 23:00:00	-2.9	0.6	-4.9	-0.3	#N/A	3.2	3.2	2.2	3.3	2.2	#N/A	2.8	2.8	1.8	1.9	1.8	#N/A	#N/A	#N/A	#N/A	#N/A	#N/A	#N/A	#N/A
2018-02-08	-2.7	-0.5	-4.3	-1.3	#N/A	2.5	2.5	2.2	2.3	2.2	#N/A	1.3	1.3	1.8	0.8	1.8	#N/A	#N/A	#N/A	#N/A	#N/A	#N/A	#N/A	#N/A
2018-02-08 01:00:00	-2.3	-0.5	-3.2	-1.3	#N/A	1.9	1.9	2.2	2.3	2.2	#N/A	0.6	0.6	1.8	0.8	1.8	#N/A	#N/A	#N/A	#N/A	#N/A	#N/A	#N/A	#N/A
2018-02-08 02:00:00	-2.7	-0.5	-3.3	-1.3	#N/A	1.6	1.6	2.2	2.3	2.2	#N/A	0.2	0.2	1.8	0.8	1.8	#N/A	#N/A	#N/A	#N/A	#N/A	#N/A	#N/A	#N/A
2018-02-08 03:00:00	-3.5	-0.5	-4	-1.3	#N/A	1.5	1.5	2.2	2.3	2.2	#N/A	-0.1	-0.1	1.8	0.8	1.8	#N/A	#N/A	#N/A	#N/A	#N/A	#N/A	#N/A	#N/A
2018-02-08 04:00:00	-3.9	-0.5	-4.7	-1.3	#N/A	1.4	1.4	2.2	2.3	2.2	#N/A	-0.3	-0.3	1.8	0.8	1.8	#N/A	#N/A	#N/A	#N/A	#N/A	#N/A	#N/A	#N/A
2018-02-08 05:00:00	-3.8	-0.5	-4.8	-1.3	#N/A	1.6	1.6	2.2	2.3	2.2	#N/A	-0.4	-0.4	1.8	0.8	1.8	#N/A	#N/A	#N/A	#N/A	#N/A	#N/A	#N/A	#N/A
2018-02-08 06:00:00	-4.5	-0.5	-5.1	-1.3	#N/A	1.6	1.6	2.2	2.3	2.2	#N/A	-0.2	-0.2	1.8	0.8	1.8	#N/A	#N/A	#N/A	#N/A	#N/A	#N/A	#N/A	#N/A
2018-02-08 07:00:00	-4.7	-0.5	-5.1	-1.3	#N/A	1.7	1.7	2.2	2.3	2.2	#N/A	0.1	0.1	1.8	0.8	1.8	#N/A	#N/A	#N/A	#N/A	#N/A	#N/A	#N/A	#N/A
2018-02-08 08:00:00	-3.4	-0.5	-4.4	-1.3	#N/A	1.6	1.6	2.2	2.3	2.2	#N/A	0.1	0.1	1.8	0.8	1.8	#N/A	#N/A	#N/A	#N/A	#N/A	#N/A	#N/A	#N/A
2018-02-08 09:00:00	-0.2	-0.5	-2.4	-1.3	#N/A	1.3	1.3	2.2	2.3	2.2	#N/A	-0.2	-0.2	1.8	0.8	1.8	#N/A	#N/A	#N/A	#N/A	#N/A	#N/A	#N/A	#N/A
2018-02-08 10:00:00	2.7	-0.5	0.1	-1.3	#N/A	1.2	1.2	2.2	2.3	2.2	#N/A	-0.4	-0.4	1.8	0.8	1.8	#N/A	#N/A	#N/A	#N/A	#N/A	#N/A	#N/A	#N/A
2018-02-08 11:00:00	3.8	-0.5	4.1	-1.3	#N/A	1.3	1.3	2.2	2.3	2.2	#N/A	-0.4	-0.4	1.8	0.8	1.8	#N/A	#N/A	#N/A	#N/A	#N/A	#N/A	#N/A	#N/A
2018-02-08 12:00:00	3.6	-0.5	3.5	-1.3	#N/A	1	1	2.2	2.3	2.2	#N/A	-0.6	-0.6	1.8	0.8	1.8	#N/A	#N/A	#N/A	#N/A	#N/A	#N/A	#N/A	#N/A
2018-02-08 13:00:00	4.4	-0.5	3.9	-1.3	#N/A	1	1	2.2	2.3	2.2	#N/A	-0.5	-0.5	1.8	0.8	1.8	#N/A	#N/A	#N/A	#N/A	#N/A	#N/A	#N/A	#N/A
2018-02-08 14:00:00	5.1	-0.5	3.6	-1.3	#N/A	1.4	1.4	2.2	2.3	2.2	#N/A	-0.3	-0.3	1.8	0.8	1.8	#N/A	#N/A	#N/A	#N/A	#N/A	#N/A	#N/A	#N/A
2018-02-08 15:00:00	5.3	-0.5	3.9	-1.3	#N/A	2.4	2.4	2.2	2.3	2.2	#N/A	0.5	0.5	1.8	0.8	1.8	#N/A	#N/A	#N/A	#N/A	#N/A	#N/A	#N/A	#N/A
2018-02-08 16:00:00	4.5	-0.5	4.5	-1.3	#N/A	3.3	3.3	2.2	2.3	2.2	#N/A	1.4	1.4	1.8	0.8	1.8	#N/A	#N/A	#N/A	#N/A	#N/A	#N/A	#N/A	#N/A
2018-02-08 17:00:00	3.4	-0.5	2.6	-1.3	#N/A	3.6	3.6	2.2	2.3	2.2	#N/A	2.8	2.8	1.8	0.8	1.8	#N/A	#N/A	#N/A	#N/A	#N/A	#N/A	#N/A	#N/A
2018-02-08 18:00:00	0.5	-0.5	-0.1	-1.3	#N/A	3.6	3.6	2.2	2.3	2.2	#N/A	2.6	2.6	1.8	0.8	1.8	#N/A	#N/A	#N/A	#N/A	#N/A	#N/A	#N/A	#N/A
2018-02-08 19:00:00	-1.1	-0.5	-2	-1.3	#N/A	3.8	3.8	2.2	2.3	2.2	#N/A	2.8	2.8	1.8	0.8	1.8	#N/A	#N/A	#N/A	#N/A	#N/A	#N/A	#N/A	#N/A
2018-02-08 20:00:00	-2.2	-0.5	-2.3	-1.3	#N/A	4	4	2.2	2.3	2.2	#N/A	2.7	2.7	1.8	0.8	1.8	#N/A	#N/A	#N/A	#N/A	#N/A	#N/A	#N/A	#N/A
2018-02-08 21:00:00	-3.3	-0.5	-3.1	-1.3	#N/A	4	4	2.2	2.3	2.2	#N/A	2.8	2.8	1.8	0.8	1.8	#N/A	#N/A	#N/A	#N/A	#N/A	#N/A	#N/A	#N/A
2018-02-08 22:00:00	-3.7	-0.5	-3.6	-1.3	#N/A	3.8	3.8	2.2	2.3	2.2	#N/A	3	3	1.8	0.8	1.8	#N/A	#N/A	#N/A	#N/A	#N/A	#N/A	#N/A	#N/A
2018-02-08 23:00:00	-4.2	-0.5	-4.4	-1.3	#N/A	3.4	3.4	2.2	2.3	2.2	#N/A	2.3	2.3	1.8	0.8	1.8	#N/A	#N/A	#N/A	#N/A	#N/A	#N/A	#N/A	#N/A
2018-02-09	-4.7	-1.1	-4.6	-1	#N/A	2.6	2.6	2.2	2.1	2.2	#N/A	1.3	1.3	1.8	1	1.8	#N/A	#N/A	#N/A	#N/A	#N/A	#N/A	#N/A	#N/A
2018-02-09 01:00:00	-5.3	-1.1	-4.8	-1	#N/A	2.1	2.1	2.2	2.1	2.2	#N/A	0.6	0.6	1.8	1	1.8	#N/A	#N/A	#N/A	#N/A	#N/A	#N/A	#N/A	#N/A
2018-02-09 02:00:00	-5.5	-1.1	-4.9	-1	#N/A	1.7	1.7	2.2	2.1	2.2	#N/A	0.5	0.5	1.8	1	1.8	#N/A	#N/A	#N/A	#N/A	#N/A	#N/A	#N/A	#N/A
2018-02-09 03:00:00	-6.1	-1.1	-4.6	-1	#N/A	1.4	1.4	2.2	2.1	2.2	#N/A	0.2	0.2	1.8	1	1.8	#N/A	#N/A	#N/A	#N/A	#N/A	#N/A	#N/A	#N/A
2018-02-09 04:00:00	-6.1	-1.1	-4.4	-1	#N/A	1.2	1.2	2.2	2.1	2.2	#N/A	0.1	0.1	1.8	1	1.8	#N/A	#N/A	#N/A	#N/A	#N/A	#N/A	#N/A	#N/A
2018-02-09 05:00:00	-6.4	-1.1	-4.8	-1	#N/A	1.1	1.1	2.2	2.1	2.2	#N/A	-0.2	-0.2	1.8	1	1.8	#N/A	#N/A	#N/A	#N/A	#N/A	#N/A	#N/A	#N/A
2018-02-09 06:00:00	-6.2	-1.1	-5.3	-1	#N/A	0.9	0.9	2.2	2.1	2.2	#N/A	-0.3	-0.3	1.8	1	1.8	#N/A	#N/A	#N/A	#N/A	#N/A	#N/A	#N/A	#N/A
2018-02-09 07:00:00	-6	-1.1	-5.6	-1	#N/A	0.7	0.7	2.2	2.1	2.2	#N/A	-0.4	-0.4	1.8	1	1.8	#N/A	#N/A	#N/A	#N/A	#N/A	#N/A	#N/A	#N/A
2018-02-09 08:00:00	-6	-1.1	-5.5	-1	#N/A	0.7	0.7	2.2	2.1	2.2	#N/A	-0.4	-0.4	1.8	1	1.8	#N/A	#N/A	#N/A	#N/A	#N/A	#N/A	#N/A	#N/A
2018-02-09 09:00:00	0.1	-1.1	-5.3	-1	#N/A	0.5	0.5	2.2	2.1	2.2	#N/A	-0.3	-0.3	1.8	1	1.8	#N/A	#N/A	#N/A	#N/A	#N/A	#N/A	#N/A	#N/A
2018-02-09 10:00:00	3.8	-1.1	-2.4	-1	#N/A	0.5	0.5	2.2	2.1	2.2	#N/A	-0.2	-0.2	1.8	1	1.8	#N/A	#N/A	#N/A	#N/A	#N/A	#N/A	#N/A	#N/A
2018-02-09 11:00:00	5.4	-1.1	4.1	-1	#N/A	0.5	0.5	2.2	2.1	2.2	#N/A	-0.4	-0.4	1.8	1	1.8	#N/A	#N/A	#N/A	#N/A	#N/A	#N/A	#N/A	#N/A
2018-02-09 12:00:00	6.5	-1.1	4.9	-1	#N/A	0.5	0.5	2.2	2.1	2.2	#N/A	-0.5	-0.5	1.8	1	1.8	#N/A	#N/A	#N/A	#N/A	#N/A	#N/A	#N/A	#N/A
2018-02-09 13:00:00	6.4	-1.1	6.7	-1	#N/A	0.6	0.6	2.2	2.1	2.2	#N/A	-0.6	-0.6	1.8	1	1.8	#N/A	#N/A	#N/A	#N/A	#N/A	#N/A	#N/A	#N/A
2018-02-09 14:00:00	6.7	-1.1	7.6	-1	#N/A	0.6	0.6	2.2	2.1	2.2	#N/A	-0.5	-0.5	1.8	1	1.8	#N/A	#N/A	#N/A	#N/A	#N/A	#N/A	#N/A	#N/A
2018-02-09 15:00:00	6.7	-1.1	5.9	-1	#N/A	2.5	2.5	2.2	2.1	2.2	#N/A	-0.4	-0.4	1.8	1	1.8	#N/A	#N/A	#N/A	#N/A	#N/A	#N/A	#N/A	#N/A
2018-02-09 16:00:00	6.4	-1.1	6.2	-1	#N/A	3.6	3.6	2.2	2.1	2.2	#N/A	0.7	0.7	1.8	1	1.8	#N/A	#N/A	#N/A	#N/A	#N/A	#N/A	#N/A	#N/A
2018-02-09 17:00:00	2.1	-1.1	4	-1	#N/A	4.1	4.1	2.2	2.1	2.2	#N/A	3	3	1.8	1	1.8	#N/A	#N/A	#N/A	#N/A	#N/A	#N/A	#N/A	#N/A
2018-02-09 18:00:00	-0.7	-1.1	0	-1	#N/A	4.4	4.4	2.2	2.1	2.2	#N/A	3.4	3.4	1.8	1	1.8	#N/A	#N/A	#N/A	#N/A	#N/A	#N/A	#N/A	#N/A
2018-02-09 19:00:00	-2.4	-1.1	-0.9	-1	#N/A	4.4	4.4	2.2	2.1	2.2	#N/A	4	4	1.8	1	1.8	#N/A	#N/A	#N/A	#N/A	#N/A	#N/A	#N/A	#N/A
2018-02-09 20:00:00	-3.1	-1.1	-1.9	-1	#N/A	4.5	4.5	2.2	2.1	2.2	#N/A	4.3	4.3	1.8	1	1.8	#N/A	#N/A	#N/A	#N/A	#N/A	#N/A	#N/A	#N/A
2018-02-09 21:00:00	-3.4	-1.1	-2.3	-1	#N/A	4.4	4.4	2.2	2.1	2.2	#N/A	3.7	3.7	1.8	1	1.8	#N/A	#N/A	#N/A	#N/A	#N/A	#N/A	#N/A	#N/A
2018-02-09 22:00:00	-4.3	-1.1	-3.3	-1	#N/A	4.4	4.4	2.2	2.1	2.2	#N/A	3.8	3.8	1.8	1	1.8	#N/A	#N/A	#N/A	#N/A	#N/A	#N/A	#N/A	#N/A
2018-02-09 23:00:00	-4.7	-1.1	-3.4	-1	#N/A	3.1	3.1	2.2	2.1	2.2	#N/A	3	3	1.8	1	1.8	#N/A	#N/A	#N/A	#N/A	#N/A	#N/A	#N/A	#N/A
2018-02-10	-4.4	0	-2.6	-0.9	#N/A	2.2	2.2	2.2	2.5	2.2	#N/A	1.6	1.6	1.8	1.6	1.8	#N/A	#N/A	#N/A	#N/A	#N/A	#N/A	#N/A	#N/A
2018-02-10 01:00:00	-3.4	0	-2.4	-0.9	#N/A	1.7	1.7	2.2	2.5	2.2	#N/A	1.3	1.3	1.8	1.6	1.8	#N/A	#N/A	#N/A	#N/A	#N/A	#N/A	#N/A	#N/A
2018-02-10 02:00:00	-3.3	0	-2.4	-0.9	#N/A	1.5	1.5	2.2	2.5	2.2	#N/A	1	1	1.8	1.6	1.8	#N/A	#N/A	#N/A	#N/A	#N/A	#N/A	#N/A	#N/A
2018-02-10 03:00:00	-4.3	0	-3.4	-0.9	#N/A	1.4	1.4	2.2	2.5	2.2	#N/A	0.9	0.9	1.8	1.6	1.8	#N/A	#N/A	#N/A	#N/A	#N/A	#N/A	#N/A	#N/A
2018-02-10 04:00:00	-3.2	0	-4.6	-0.9	#N/A	1.2	1.2	2.2	2.5	2.2	#N/A	0.5	0.5	1.8	1.6	1.8	#N/A	#N/A	#N/A	#N/A	#N/A	#N/A	#N/A	#N/A
2018-02-10 05:00:00	-3	0	-4.3	-0.9	#N/A	1	1	2.2	2.5	2.2	#N/A	0.5	0.5	1.8	1.6	1.8	#N/A	#N/A	#N/A	#N/A	#N/A	#N/A	#N/A	#N/A
2018-02-10 06:00:00	-3.7	0	-4.6	-0.9	#N/A	1.1	1.1	2.2	2.5	2.2	#N/A	0.8	0.8	1.8	1.6	1.8	#N/A	#N/A	#N/A	#N/A	#N/A	#N/A	#N/A	#N/A
2018-02-10 07:00:00	-4.3	0	-5.1	-0.9	#N/A	1.4	1.4	2.2	2.5	2.2	#N/A	0.9	0.9	1.8	1.6	1.8	#N/A	#N/A	#N/A	#N/A	#N/A	#N/A	#N/A	#N/A
2018-02-10 08:00:00	-4.3	0	-4.9	-0.9	#N/A	1.5	1.5	2.2	2.5	2.2	#N/A	0.9	0.9	1.8	1.6	1.8	#N/A	#N/A	#N/A	#N/A	#N/A	#N/A	#N/A	#N/A
2018-02-10 09:00:00	1.7	0	-4.6	-0.9	#N/A	1.2	1.2	2.2	2.5	2.2	#N/A	0.5	0.5	1.8	1.6	1.8	#N/A	#N/A	#N/A	#N/A	#N/A	#N/A	#N/A	#N/A
2018-02-10 10:00:00	3.7	0	-2.5	-0.9	#N/A	1.5	1.5	2.2	2.5	2.2	#N/A	0.1	0.1	1.8	1.6	1.8	#N/A	#N/A	#N/A	#N/A	#N/A	#N/A	#N/A	#N/A
2018-02-10 11:00:00	5.2	0	3.8	-0.9	#N/A	1.6	1.6	2.2	2.5	2.2	#N/A	0.2	0.2	1.8	1.6	1.8	#N/A	#N/A	#N/A	#N/A	#N/A	#N/A	#N/A	#N/A
2018-02-10 12:00:00	5.6	0	5.5	-0.9	#N/A	1.4	1.4	2.2	2.5	2.2	#N/A	0.1	0.1	1.8	1.6	1.8	#N/A	#N/A	#N/A	#N/A	#N/A	#N/A	#N/A	#N/A
2018-02-10 13:00:00	7	0	7.3	-0.9	#N/A	1.2	1.2	2.2	2.5	2.2	#N/A	0	0	1.8	1.6	1.8	#N/A	#N/A	#N/A	#N/A	#N/A	#N/A	#N/A	#N/A
2018-02-10 14:00:00	7.3	0	8.2	-0.9	#N/A	1.3	1.3	2.2	2.5	2.2	#N/A	0.1	0.1	1.8	1.6	1.8	#N/A	#N/A	#N/A	#N/A	#N/A	#N/A	#N/A	#N/A
2018-02-10 15:00:00	7.4	0	7.9	-0.9	#N/A	3.1	3.1	2.2	2.5	2.2	#N/A	0.2	0.2	1.8	1.6	1.8	#N/A	#N/A	#N/A	#N/A	#N/A	#N/A	#N/A	#N/A
2018-02-10 16:00:00	6.1	0	6.9	-0.9	#N/A	3.7	3.7	2.2	2.5	2.2	#N/A	0.9	0.9	1.8	1.6	1.8	#N/A	#N/A	#N/A	#N/A	#N/A	#N/A	#N/A	#N/A
2018-02-10 17:00:00	3.4	0	3.7	-0.9	#N/A	4.1	4.1	2.2	2.5	2.2	#N/A	3.2	3.2	1.8	1.6	1.8	#N/A	#N/A	#N/A	#N/A	#N/A	#N/A	#N/A	#N/A
2018-02-10 18:00:00	-0.2	0	-1.4	-0.9	#N/A	4.3	4.3	2.2	2.5	2.2	#N/A	3.8	3.8	1.8	1.6	1.8	#N/A	#N/A	#N/A	#N/A	#N/A	#N/A	#N/A	#N/A
2018-02-10 19:00:00	-0.8	0	-3.3	-0.9	#N/A	4.7	4.7	2.2	2.5	2.2	#N/A	4.5	4.5	1.8	1.6	1.8	#N/A	#N/A	#N/A	#N/A	#N/A	#N/A	#N/A	#N/A
2018-02-10 20:00:00	-2.3	0	-3.9	-0.9	#N/A	4.8	4.8	2.2	2.5	2.2	#N/A	4.8	4.8	1.8	1.6	1.8	#N/A	#N/A	#N/A	#N/A	#N/A	#N/A	#N/A	#N/A
2018-02-10 21:00:00	-2.9	0	-4.4	-0.9	#N/A	4.8	4.8	2.2	2.5	2.2	#N/A	4.8	4.8	1.8	1.6	1.8	#N/A	#N/A	#N/A	#N/A	#N/A	#N/A	#N/A	#N/A
2018-02-10 22:00:00	-3.1	0	-5.2	-0.9	#N/A	4.5	4.5	2.2	2.5	2.2	#N/A	4.4	4.4	1.8	1.6	1.8	#N/A	#N/A	#N/A	#N/A	#N/A	#N/A	#N/A	#N/A
2018-02-10 23:00:00	-4.2	0	-5.6	-0.9	#N/A	3.6	3.6	2.2	2.5	2.2	#N/A	3.2	3.2	1.8	1.6	1.8	#N/A	#N/A	#N/A	#N/A	#N/A	#N/A	#N/A	#N/A
2018-02-11	-4.9	1.1	-5.7	0.6	#N/A	2.6	2.6	2.2	2.7	2.2	#N/A	1.4	1.4	1.8	1.6	1.8	#N/A	#N/A	#N/A	#N/A	#N/A	#N/A	#N/A	#N/A
2018-02-11 01:00:00	-5	1.1	-6.1	0.6	#N/A	2.4	2.4	2.2	2.7	2.2	#N/A	0.7	0.7	1.8	1.6	1.8	#N/A	#N/A	#N/A	#N/A	#N/A	#N/A	#N/A	#N/A
2018-02-11 02:00:00	-5.2	1.1	-5.3	0.6	#N/A	2	2	2.2	2.7	2.2	#N/A	0.5	0.5	1.8	1.6	1.8	#N/A	#N/A	#N/A	#N/A	#N/A	#N/A	#N/A	#N/A
2018-02-11 03:00:00	-4.8	1.1	-5	0.6	#N/A	1.8	1.8	2.2	2.7	2.2	#N/A	0.3	0.3	1.8	1.6	1.8	#N/A	#N/A	#N/A	#N/A	#N/A	#N/A	#N/A	#N/A
2018-02-11 04:00:00	-4.9	1.1	-5	0.6	#N/A	1.8	1.8	2.2	2.7	2.2	#N/A	0	0	1.8	1.6	1.8	#N/A	#N/A	#N/A	#N/A	#N/A	#N/A	#N/A	#N/A
2018-02-11 05:00:00	-5.8	1.1	-5.4	0.6	#N/A	1.4	1.4	2.2	2.7	2.2	#N/A	-0.1	-0.1	1.8	1.6	1.8	#N/A	#N/A	#N/A	#N/A	#N/A	#N/A	#N/A	#N/A
2018-02-11 06:00:00	-6.3	1.1	-5.4	0.6	#N/A	1.2	1.2	2.2	2.7	2.2	#N/A	-0.1	-0.1	1.8	1.6	1.8	#N/A	#N/A	#N/A	#N/A	#N/A	#N/A	#N/A	#N/A
2018-02-11 07:00:00	-6.5	1.1	-5.5	0.6	#N/A	1.2	1.2	2.2	2.7	2.2	#N/A	-0.2	-0.2	1.8	1.6	1.8	#N/A	#N/A	#N/A	#N/A	#N/A	#N/A	#N/A	#N/A
2018-02-11 08:00:00	-6.3	1.1	-5.3	0.6	#N/A	1.1	1.1	2.2	2.7	2.2	#N/A	0	0	1.8	1.6	1.8	#N/A	#N/A	#N/A	#N/A	#N/A	#N/A	#N/A	#N/A
2018-02-11 09:00:00	0.9	1.1	-4.5	0.6	#N/A	1.3	1.3	2.2	2.7	2.2	#N/A	0.1	0.1	1.8	1.6	1.8	#N/A	#N/A	#N/A	#N/A	#N/A	#N/A	#N/A	#N/A
2018-02-11 10:00:00	4	1.1	-0.2	0.6	#N/A	1.3	1.3	2.2	2.7	2.2	#N/A	0.1	0.1	1.8	1.6	1.8	#N/A	#N/A	#N/A	#N/A	#N/A	#N/A	#N/A	#N/A
2018-02-11 11:00:00	6.2	1.1	6.2	0.6	#N/A	1	1	2.2	2.7	2.2	#N/A	0	0	1.8	1.6	1.8	#N/A	#N/A	#N/A	#N/A	#N/A	#N/A	#N/A	#N/A
2018-02-11 12:00:00	8.3	1.1	7.5	0.6	#N/A	0.9	0.9	2.2	2.7	2.2	#N/A	0	0	1.8	1.6	1.8	#N/A	#N/A	#N/A	#N/A	#N/A	#N/A	#N/A	#N/A
2018-02-11 13:00:00	9.4	1.1	8.8	0.6	#N/A	0.8	0.8	2.2	2.7	2.2	#N/A	0	0	1.8	1.6	1.8	#N/A	#N/A	#N/A	#N/A	#N/A	#N/A	#N/A	#N/A
2018-02-11 14:00:00	10.2	1.1	9.3	0.6	#N/A	0.9	0.9	2.2	2.7	2.2	#N/A	0.1	0.1	1.8	1.6	1.8	#N/A	#N/A	#N/A	#N/A	#N/A	#N/A	#N/A	#N/A
2018-02-11 15:00:00	8.4	1.1	9	0.6	#N/A	3	3	2.2	2.7	2.2	#N/A	0.4	0.4	1.8	1.6	1.8	#N/A	#N/A	#N/A	#N/A	#N/A	#N/A	#N/A	#N/A
2018-02-11 16:00:00	8.3	1.1	6.2	0.6	#N/A	4	4	2.2	2.7	2.2	#N/A	2	2	1.8	1.6	1.8	#N/A	#N/A	#N/A	#N/A	#N/A	#N/A	#N/A	#N/A
2018-02-11 17:00:00	6.2	1.1	5.3	0.6	#N/A	4.7	4.7	2.2	2.7	2.2	#N/A	4.3	4.3	1.8	1.6	1.8	#N/A	#N/A	#N/A	#N/A	#N/A	#N/A	#N/A	#N/A
2018-02-11 18:00:00	2.9	1.1	3	0.6	#N/A	5.3	5.3	2.2	2.7	2.2	#N/A	4.8	4.8	1.8	1.6	1.8	#N/A	#N/A	#N/A	#N/A	#N/A	#N/A	#N/A	#N/A
2018-02-11 19:00:00	1.8	1.1	2.2	0.6	#N/A	5.6	5.6	2.2	2.7	2.2	#N/A	5.2	5.2	1.8	1.6	1.8	#N/A	#N/A	#N/A	#N/A	#N/A	#N/A	#N/A	#N/A
2018-02-11 20:00:00	2.3	1.1	2.6	0.6	#N/A	5.9	5.9	2.2	2.7	2.2	#N/A	5.4	5.4	1.8	1.6	1.8	#N/A	#N/A	#N/A	#N/A	#N/A	#N/A	#N/A	#N/A
2018-02-11 21:00:00	2.7	1.1	2.7	0.6	#N/A	5.4	5.4	2.2	2.7	2.2	#N/A	5.3	5.3	1.8	1.6	1.8	#N/A	#N/A	#N/A	#N/A	#N/A	#N/A	#N/A	#N/A
2018-02-11 22:00:00	2.7	1.1	2.6	0.6	#N/A	5.4	5.4	2.2	2.7	2.2	#N/A	4.3	4.3	1.8	1.6	1.8	#N/A	#N/A	#N/A	#N/A	#N/A	#N/A	#N/A	#N/A
2018-02-11 23:00:00	1.9	1.1	2.3	0.6	#N/A	4.8	4.8	2.2	2.7	2.2	#N/A	4	4	1.8	1.6	1.8	#N/A	#N/A	#N/A	#N/A	#N/A	#N/A	#N/A	#N/A
2018-02-12	1.5	0.4	2.1	-0.9	#N/A	3.8	3.8	2.2	3.3	2.2	#N/A	3.2	3.2	1.8	2.4	1.8	#N/A	#N/A	#N/A	#N/A	#N/A	#N/A	#N/A	#N/A
2018-02-12 01:00:00	4	0.4	1.2	-0.9	#N/A	3.5	3.5	2.2	3.3	2.2	#N/A	3	3	1.8	2.4	1.8	#N/A	#N/A	#N/A	#N/A	#N/A	#N/A	#N/A	#N/A
2018-02-12 02:00:00	0.8	0.4	-0.9	-0.9	#N/A	3.7	3.7	2.2	3.3	2.2	#N/A	3.1	3.1	1.8	2.4	1.8	#N/A	#N/A	#N/A	#N/A	#N/A	#N/A	#N/A	#N/A
2018-02-12 03:00:00	-1.8	0.4	-1.6	-0.9	#N/A	3.8	3.8	2.2	3.3	2.2	#N/A	3.2	3.2	1.8	2.4	1.8	#N/A	#N/A	#N/A	#N/A	#N/A	#N/A	#N/A	#N/A
2018-02-12 04:00:00	-3	0.4	-2.5	-0.9	#N/A	3.7	3.7	2.2	3.3	2.2	#N/A	3.1	3.1	1.8	2.4	1.8	#N/A	#N/A	#N/A	#N/A	#N/A	#N/A	#N/A	#N/A
2018-02-12 05:00:00	-3.2	0.4	-3.2	-0.9	#N/A	3.5	3.5	2.2	3.3	2.2	#N/A	3	3	1.8	2.4	1.8	#N/A	#N/A	#N/A	#N/A	#N/A	#N/A	#N/A	#N/A
2018-02-12 06:00:00	-3.7	0.4	-3.7	-0.9	#N/A	3.4	3.4	2.2	3.3	2.2	#N/A	2.9	2.9	1.8	2.4	1.8	#N/A	#N/A	#N/A	#N/A	#N/A	#N/A	#N/A	#N/A
2018-02-12 07:00:00	-4.3	0.4	-4.1	-0.9	#N/A	4.1	4.1	2.2	3.3	2.2	#N/A	2.6	2.6	1.8	2.4	1.8	#N/A	#N/A	#N/A	#N/A	#N/A	#N/A	#N/A	#N/A
2018-02-12 08:00:00	-4.4	0.4	-4.1	-0.9	#N/A	3.1	3.1	2.2	3.3	2.2	#N/A	1.8	1.8	1.8	2.4	1.8	#N/A	#N/A	#N/A	#N/A	#N/A	#N/A	#N/A	#N/A
2018-02-12 09:00:00	2.6	0.4	-4	-0.9	#N/A	2.3	2.3	2.2	3.3	2.2	#N/A	1.5	1.5	1.8	2.4	1.8	#N/A	#N/A	#N/A	#N/A	#N/A	#N/A	#N/A	#N/A
2018-02-12 10:00:00	4.3	0.4	-2.1	-0.9	#N/A	2	2	2.2	3.3	2.2	#N/A	1.2	1.2	1.8	2.4	1.8	#N/A	#N/A	#N/A	#N/A	#N/A	#N/A	#N/A	#N/A
2018-02-12 11:00:00	3.5	0.4	1.3	-0.9	#N/A	1.9	1.9	2.2	3.3	2.2	#N/A	0.9	0.9	1.8	2.4	1.8	#N/A	#N/A	#N/A	#N/A	#N/A	#N/A	#N/A	#N/A
2018-02-12 12:00:00	4.8	0.4	3.8	-0.9	#N/A	1.7	1.7	2.2	3.3	2.2	#N/A	0.7	0.7	1.8	2.4	1.8	#N/A	#N/A	#N/A	#N/A	#N/A	#N/A	#N/A	#N/A
2018-02-12 13:00:00	5.2	0.4	6.1	-0.9	#N/A	1.5	1.5	2.2	3.3	2.2	#N/A	0.6	0.6	1.8	2.4	1.8	#N/A	#N/A	#N/A	#N/A	#N/A	#N/A	#N/A	#N/A
2018-02-12 14:00:00	5.4	0.4	6	-0.9	#N/A	1.5	1.5	2.2	3.3	2.2	#N/A	0.6	0.6	1.8	2.4	1.8	#N/A	#N/A	#N/A	#N/A	#N/A	#N/A	#N/A	#N/A
2018-02-12 15:00:00	5.4	0.4	5.7	-0.9	#N/A	3.6	3.6	2.2	3.3	2.2	#N/A	0.6	0.6	1.8	2.4	1.8	#N/A	#N/A	#N/A	#N/A	#N/A	#N/A	#N/A	#N/A
2018-02-12 16:00:00	4.3	0.4	4.8	-0.9	#N/A	4.1	4.1	2.2	3.3	2.2	#N/A	1.3	1.3	1.8	2.4	1.8	#N/A	#N/A	#N/A	#N/A	#N/A	#N/A	#N/A	#N/A
2018-02-12 17:00:00	1.8	0.4	2.1	-0.9	#N/A	3.8	3.8	2.2	3.3	2.2	#N/A	2.6	2.6	1.8	2.4	1.8	#N/A	#N/A	#N/A	#N/A	#N/A	#N/A	#N/A	#N/A
2018-02-12 18:00:00	0.3	0.4	-1.9	-0.9	#N/A	4.2	4.2	2.2	3.3	2.2	#N/A	3.4	3.4	1.8	2.4	1.8	#N/A	#N/A	#N/A	#N/A	#N/A	#N/A	#N/A	#N/A
2018-02-12 19:00:00	-0.1	0.4	-3.8	-0.9	#N/A	4.3	4.3	2.2	3.3	2.2	#N/A	4.3	4.3	1.8	2.4	1.8	#N/A	#N/A	#N/A	#N/A	#N/A	#N/A	#N/A	#N/A
2018-02-12 20:00:00	-2.2	0.4	-4.9	-0.9	#N/A	4.4	4.4	2.2	3.3	2.2	#N/A	4.2	4.2	1.8	2.4	1.8	#N/A	#N/A	#N/A	#N/A	#N/A	#N/A	#N/A	#N/A
2018-02-12 21:00:00	-3.2	0.4	-5.7	-0.9	#N/A	4.3	4.3	2.2	3.3	2.2	#N/A	4.1	4.1	1.8	2.4	1.8	#N/A	#N/A	#N/A	#N/A	#N/A	#N/A	#N/A	#N/A
2018-02-12 22:00:00	-3.1	0.4	-6.1	-0.9	#N/A	4	4	2.2	3.3	2.2	#N/A	3.7	3.7	1.8	2.4	1.8	#N/A	#N/A	#N/A	#N/A	#N/A	#N/A	#N/A	#N/A
2018-02-12 23:00:00	-4.5	0.4	-6	-0.9	#N/A	3.2	3.2	2.2	3.3	2.2	#N/A	2.7	2.7	1.8	2.4	1.8	#N/A	#N/A	#N/A	#N/A	#N/A	#N/A	#N/A	#N/A
2018-02-13	-4.7	-1	-5.5	-2.6	#N/A	2.7	2.7	2.2	2	2.2	#N/A	1.2	1.2	1.8	0.5	1.8	#N/A	#N/A	#N/A	#N/A	#N/A	#N/A	#N/A	#N/A
2018-02-13 01:00:00	-5.5	-1	-6.3	-2.6	#N/A	2.6	2.6	2.2	2	2.2	#N/A	0.5	0.5	1.8	0.5	1.8	#N/A	#N/A	#N/A	#N/A	#N/A	#N/A	#N/A	#N/A
2018-02-13 02:00:00	-3.7	-1	-5.5	-2.6	#N/A	1.9	1.9	2.2	2	2.2	#N/A	0.1	0.1	1.8	0.5	1.8	#N/A	#N/A	#N/A	#N/A	#N/A	#N/A	#N/A	#N/A
2018-02-13 03:00:00	-2.7	-1	-4.9	-2.6	#N/A	1.6	1.6	2.2	2	2.2	#N/A	-0.3	-0.3	1.8	0.5	1.8	#N/A	#N/A	#N/A	#N/A	#N/A	#N/A	#N/A	#N/A
2018-02-13 04:00:00	-4.1	-1	-5.9	-2.6	#N/A	1.6	1.6	2.2	2	2.2	#N/A	-0.4	-0.4	1.8	0.5	1.8	#N/A	#N/A	#N/A	#N/A	#N/A	#N/A	#N/A	#N/A
2018-02-13 05:00:00	-3.7	-1	-6.1	-2.6	#N/A	1.2	1.2	2.2	2	2.2	#N/A	-0.4	-0.4	1.8	0.5	1.8	#N/A	#N/A	#N/A	#N/A	#N/A	#N/A	#N/A	#N/A
2018-02-13 06:00:00	-3.7	-1	-5.7	-2.6	#N/A	1.1	1.1	2.2	2	2.2	#N/A	-0.2	-0.2	1.8	0.5	1.8	#N/A	#N/A	#N/A	#N/A	#N/A	#N/A	#N/A	#N/A
2018-02-13 07:00:00	-3.7	-1	-5.5	-2.6	#N/A	0.9	0.9	2.2	2	2.2	#N/A	-0.6	-0.6	1.8	0.5	1.8	#N/A	#N/A	#N/A	#N/A	#N/A	#N/A	#N/A	#N/A
2018-02-13 08:00:00	-4.5	-1	-6	-2.6	#N/A	1.4	1.4	2.2	2	2.2	#N/A	-0.3	-0.3	1.8	0.5	1.8	#N/A	#N/A	#N/A	#N/A	#N/A	#N/A	#N/A	#N/A
2018-02-13 09:00:00	-2.8	-1	-5	-2.6	#N/A	1.6	1.6	2.2	2	2.2	#N/A	-0.1	-0.1	1.8	0.5	1.8	#N/A	#N/A	#N/A	#N/A	#N/A	#N/A	#N/A	#N/A
2018-02-13 10:00:00	0.2	-1	-1.7	-2.6	#N/A	1.2	1.2	2.2	2	2.2	#N/A	-0.5	-0.5	1.8	0.5	1.8	#N/A	#N/A	#N/A	#N/A	#N/A	#N/A	#N/A	#N/A
2018-02-13 11:00:00	1.3	-1	0.7	-2.6	#N/A	1.3	1.3	2.2	2	2.2	#N/A	-0.6	-0.6	1.8	0.5	1.8	#N/A	#N/A	#N/A	#N/A	#N/A	#N/A	#N/A	#N/A
2018-02-13 12:00:00	2.9	-1	1.1	-2.6	#N/A	1.3	1.3	2.2	2	2.2	#N/A	-0.4	-0.4	1.8	0.5	1.8	#N/A	#N/A	#N/A	#N/A	#N/A	#N/A	#N/A	#N/A
2018-02-13 13:00:00	3.5	-1	3.2	-2.6	#N/A	1.3	1.3	2.2	2	2.2	#N/A	-0.4	-0.4	1.8	0.5	1.8	#N/A	#N/A	#N/A	#N/A	#N/A	#N/A	#N/A	#N/A
2018-02-13 14:00:00	3.8	-1	3.6	-2.6	#N/A	1	1	2.2	2	2.2	#N/A	-0.6	-0.6	1.8	0.5	1.8	#N/A	#N/A	#N/A	#N/A	#N/A	#N/A	#N/A	#N/A
2018-02-13 15:00:00	3.8	-1	1.8	-2.6	#N/A	1.5	1.5	2.2	2	2.2	#N/A	-0.2	-0.2	1.8	0.5	1.8	#N/A	#N/A	#N/A	#N/A	#N/A	#N/A	#N/A	#N/A
2018-02-13 16:00:00	3.1	-1	1.2	-2.6	#N/A	2.4	2.4	2.2	2	2.2	#N/A	1	1	1.8	0.5	1.8	#N/A	#N/A	#N/A	#N/A	#N/A	#N/A	#N/A	#N/A
2018-02-13 17:00:00	1.8	-1	0.3	-2.6	#N/A	2.7	2.7	2.2	2	2.2	#N/A	1.8	1.8	1.8	0.5	1.8	#N/A	#N/A	#N/A	#N/A	#N/A	#N/A	#N/A	#N/A
2018-02-13 18:00:00	0.8	-1	-0.8	-2.6	#N/A	3.1	3.1	2.2	2	2.2	#N/A	1.9	1.9	1.8	0.5	1.8	#N/A	#N/A	#N/A	#N/A	#N/A	#N/A	#N/A	#N/A
2018-02-13 19:00:00	0.4	-1	-1.6	-2.6	#N/A	3.3	3.3	2.2	2	2.2	#N/A	2.7	2.7	1.8	0.5	1.8	#N/A	#N/A	#N/A	#N/A	#N/A	#N/A	#N/A	#N/A
2018-02-13 20:00:00	-0.3	-1	-2.2	-2.6	#N/A	3.4	3.4	2.2	2	2.2	#N/A	2.8	2.8	1.8	0.5	1.8	#N/A	#N/A	#N/A	#N/A	#N/A	#N/A	#N/A	#N/A
2018-02-13 21:00:00	-1.4	-1	-3	-2.6	#N/A	3.3	3.3	2.2	2	2.2	#N/A	2.1	2.1	1.8	0.5	1.8	#N/A	#N/A	#N/A	#N/A	#N/A	#N/A	#N/A	#N/A
2018-02-13 22:00:00	-2.3	-1	-3.9	-2.6	#N/A	3.1	3.1	2.2	2	2.2	#N/A	1.9	1.9	1.8	0.5	1.8	#N/A	#N/A	#N/A	#N/A	#N/A	#N/A	#N/A	#N/A
2018-02-13 23:00:00	-3	-1	-4.3	-2.6	#N/A	2.7	2.7	2.2	2	2.2	#N/A	1.5	1.5	1.8	0.5	1.8	#N/A	#N/A	#N/A	#N/A	#N/A	#N/A	#N/A	#N/A
2018-02-14	-3.3	-1.3	-4.6	-1.9	#N/A	2.4	2.4	2.2	1.8	2.2	#N/A	1.1	1.1	1.8	0.5	1.8	#N/A	#N/A	#N/A	#N/A	#N/A	#N/A	#N/A	#N/A
2018-02-14 01:00:00	-3.6	-1.3	-5	-1.9	#N/A	2.2	2.2	2.2	1.8	2.2	#N/A	0.8	0.8	1.8	0.5	1.8	#N/A	#N/A	#N/A	#N/A	#N/A	#N/A	#N/A	#N/A
2018-02-14 02:00:00	-4.3	-1.3	-5.9	-1.9	#N/A	2	2	2.2	1.8	2.2	#N/A	0.6	0.6	1.8	0.5	1.8	#N/A	#N/A	#N/A	#N/A	#N/A	#N/A	#N/A	#N/A
2018-02-14 03:00:00	-5	-1.3	-5.9	-1.9	#N/A	1.7	1.7	2.2	1.8	2.2	#N/A	0.3	0.3	1.8	0.5	1.8	#N/A	#N/A	#N/A	#N/A	#N/A	#N/A	#N/A	#N/A
2018-02-14 04:00:00	-5.9	-1.3	-7.8	-1.9	#N/A	1.4	1.4	2.2	1.8	2.2	#N/A	-0.1	-0.1	1.8	0.5	1.8	#N/A	#N/A	#N/A	#N/A	#N/A	#N/A	#N/A	#N/A
2018-02-14 05:00:00	-7.1	-1.3	-8	-1.9	#N/A	1.1	1.1	2.2	1.8	2.2	#N/A	-0.2	-0.2	1.8	0.5	1.8	#N/A	#N/A	#N/A	#N/A	#N/A	#N/A	#N/A	#N/A
2018-02-14 06:00:00	-7.6	-1.3	-7.8	-1.9	#N/A	1	1	2.2	1.8	2.2	#N/A	-0.4	-0.4	1.8	0.5	1.8	#N/A	#N/A	#N/A	#N/A	#N/A	#N/A	#N/A	#N/A
2018-02-14 07:00:00	-7.2	-1.3	-7.5	-1.9	#N/A	0.9	0.9	2.2	1.8	2.2	#N/A	-0.5	-0.5	1.8	0.5	1.8	#N/A	#N/A	#N/A	#N/A	#N/A	#N/A	#N/A	#N/A
2018-02-14 08:00:00	-7.4	-1.3	-7.4	-1.9	#N/A	0.7	0.7	2.2	1.8	2.2	#N/A	-0.9	-0.9	1.8	0.5	1.8	#N/A	#N/A	#N/A	#N/A	#N/A	#N/A	#N/A	#N/A
2018-02-14 09:00:00	-1.2	-1.3	-6.9	-1.9	#N/A	0.5	0.5	2.2	1.8	2.2	#N/A	-0.9	-0.9	1.8	0.5	1.8	#N/A	#N/A	#N/A	#N/A	#N/A	#N/A	#N/A	#N/A
2018-02-14 10:00:00	2.7	-1.3	-3	-1.9	#N/A	0.2	0.2	2.2	1.8	2.2	#N/A	-1.6	-1.6	1.8	0.5	1.8	#N/A	#N/A	#N/A	#N/A	#N/A	#N/A	#N/A	#N/A
2018-02-14 11:00:00	4.5	-1.3	3	-1.9	#N/A	-0.2	-0.2	2.2	1.8	2.2	#N/A	-1.7	-1.7	1.8	0.5	1.8	#N/A	#N/A	#N/A	#N/A	#N/A	#N/A	#N/A	#N/A
2018-02-14 12:00:00	5.7	-1.3	5.5	-1.9	#N/A	-0.3	-0.3	2.2	1.8	2.2	#N/A	-1.6	-1.6	1.8	0.5	1.8	#N/A	#N/A	#N/A	#N/A	#N/A	#N/A	#N/A	#N/A
2018-02-14 13:00:00	6.4	-1.3	6.2	-1.9	#N/A	-0.2	-0.2	2.2	1.8	2.2	#N/A	-1.5	-1.5	1.8	0.5	1.8	#N/A	#N/A	#N/A	#N/A	#N/A	#N/A	#N/A	#N/A
2018-02-14 14:00:00	7	-1.3	7.2	-1.9	#N/A	-0.2	-0.2	2.2	1.8	2.2	#N/A	-1.4	-1.4	1.8	0.5	1.8	#N/A	#N/A	#N/A	#N/A	#N/A	#N/A	#N/A	#N/A
2018-02-14 15:00:00	6.7	-1.3	6.6	-1.9	#N/A	1.6	1.6	2.2	1.8	2.2	#N/A	-1.3	-1.3	1.8	0.5	1.8	#N/A	#N/A	#N/A	#N/A	#N/A	#N/A	#N/A	#N/A
2018-02-14 16:00:00	5.8	-1.3	5.7	-1.9	#N/A	2.7	2.7	2.2	1.8	2.2	#N/A	0.1	0.1	1.8	0.5	1.8	#N/A	#N/A	#N/A	#N/A	#N/A	#N/A	#N/A	#N/A
2018-02-14 17:00:00	1.5	-1.3	3	-1.9	#N/A	3.3	3.3	2.2	1.8	2.2	#N/A	2.3	2.3	1.8	0.5	1.8	#N/A	#N/A	#N/A	#N/A	#N/A	#N/A	#N/A	#N/A
2018-02-14 18:00:00	-1.3	-1.3	-0.5	-1.9	#N/A	3.6	3.6	2.2	1.8	2.2	#N/A	3.2	3.2	1.8	0.5	1.8	#N/A	#N/A	#N/A	#N/A	#N/A	#N/A	#N/A	#N/A
2018-02-14 19:00:00	-2.8	-1.3	-1.8	-1.9	#N/A	3.8	3.8	2.2	1.8	2.2	#N/A	3.4	3.4	1.8	0.5	1.8	#N/A	#N/A	#N/A	#N/A	#N/A	#N/A	#N/A	#N/A
2018-02-14 20:00:00	-3.2	-1.3	-2.4	-1.9	#N/A	4	4	2.2	1.8	2.2	#N/A	3.8	3.8	1.8	0.5	1.8	#N/A	#N/A	#N/A	#N/A	#N/A	#N/A	#N/A	#N/A
2018-02-14 21:00:00	-3.8	-1.3	-2.6	-1.9	#N/A	3.9	3.9	2.2	1.8	2.2	#N/A	3.6	3.6	1.8	0.5	1.8	#N/A	#N/A	#N/A	#N/A	#N/A	#N/A	#N/A	#N/A
2018-02-14 22:00:00	-4.1	-1.3	-3.2	-1.9	#N/A	3.7	3.7	2.2	1.8	2.2	#N/A	3.3	3.3	1.8	0.5	1.8	#N/A	#N/A	#N/A	#N/A	#N/A	#N/A	#N/A	#N/A
2018-02-14 23:00:00	-4.4	-1.3	-3.2	-1.9	#N/A	2.3	2.3	2.2	1.8	2.2	#N/A	2.3	2.3	1.8	0.5	1.8	#N/A	#N/A	#N/A	#N/A	#N/A	#N/A	#N/A	#N/A
2018-02-15	-4.3	2.5	-3.4	2.4	#N/A	1.5	1.5	2.2	2.3	2.2	#N/A	1.1	1.1	1.8	1.8	1.8	#N/A	#N/A	#N/A	#N/A	#N/A	#N/A	#N/A	#N/A
2018-02-15 01:00:00	-3.5	2.5	-2.5	2.4	#N/A	1.1	1.1	2.2	2.3	2.2	#N/A	0.6	0.6	1.8	1.8	1.8	#N/A	#N/A	#N/A	#N/A	#N/A	#N/A	#N/A	#N/A
2018-02-15 02:00:00	-3.1	2.5	-2.2	2.4	#N/A	0.9	0.9	2.2	2.3	2.2	#N/A	0.4	0.4	1.8	1.8	1.8	#N/A	#N/A	#N/A	#N/A	#N/A	#N/A	#N/A	#N/A
2018-02-15 03:00:00	-2.8	2.5	-2	2.4	#N/A	0.8	0.8	2.2	2.3	2.2	#N/A	0.3	0.3	1.8	1.8	1.8	#N/A	#N/A	#N/A	#N/A	#N/A	#N/A	#N/A	#N/A
2018-02-15 04:00:00	-2.2	2.5	-1.7	2.4	#N/A	0.7	0.7	2.2	2.3	2.2	#N/A	0.1	0.1	1.8	1.8	1.8	#N/A	#N/A	#N/A	#N/A	#N/A	#N/A	#N/A	#N/A
2018-02-15 05:00:00	-1.6	2.5	-1.1	2.4	#N/A	0.6	0.6	2.2	2.3	2.2	#N/A	0.1	0.1	1.8	1.8	1.8	#N/A	#N/A	#N/A	#N/A	#N/A	#N/A	#N/A	#N/A
2018-02-15 06:00:00	-1.1	2.5	-0.9	2.4	#N/A	0.6	0.6	2.2	2.3	2.2	#N/A	0.1	0.1	1.8	1.8	1.8	#N/A	#N/A	#N/A	#N/A	#N/A	#N/A	#N/A	#N/A
2018-02-15 07:00:00	-0.6	2.5	-0.9	2.4	#N/A	0.9	0.9	2.2	2.3	2.2	#N/A	0.4	0.4	1.8	1.8	1.8	#N/A	#N/A	#N/A	#N/A	#N/A	#N/A	#N/A	#N/A
2018-02-15 08:00:00	0.5	2.5	-0.8	2.4	#N/A	1.1	1.1	2.2	2.3	2.2	#N/A	0.6	0.6	1.8	1.8	1.8	#N/A	#N/A	#N/A	#N/A	#N/A	#N/A	#N/A	#N/A
2018-02-15 09:00:00	2.5	2.5	0.9	2.4	#N/A	1.2	1.2	2.2	2.3	2.2	#N/A	0.7	0.7	1.8	1.8	1.8	#N/A	#N/A	#N/A	#N/A	#N/A	#N/A	#N/A	#N/A
2018-02-15 10:00:00	5.8	2.5	3.9	2.4	#N/A	1.4	1.4	2.2	2.3	2.2	#N/A	0.8	0.8	1.8	1.8	1.8	#N/A	#N/A	#N/A	#N/A	#N/A	#N/A	#N/A	#N/A
2018-02-15 11:00:00	8.6	2.5	7.1	2.4	#N/A	1.6	1.6	2.2	2.3	2.2	#N/A	1	1	1.8	1.8	1.8	#N/A	#N/A	#N/A	#N/A	#N/A	#N/A	#N/A	#N/A
2018-02-15 12:00:00	6.9	2.5	6.9	2.4	#N/A	1.7	1.7	2.2	2.3	2.2	#N/A	1.1	1.1	1.8	1.8	1.8	#N/A	#N/A	#N/A	#N/A	#N/A	#N/A	#N/A	#N/A
2018-02-15 13:00:00	6.7	2.5	5.8	2.4	#N/A	1.9	1.9	2.2	2.3	2.2	#N/A	1.1	1.1	1.8	1.8	1.8	#N/A	#N/A	#N/A	#N/A	#N/A	#N/A	#N/A	#N/A
2018-02-15 14:00:00	8.5	2.5	7	2.4	#N/A	2.2	2.2	2.2	2.3	2.2	#N/A	1.2	1.2	1.8	1.8	1.8	#N/A	#N/A	#N/A	#N/A	#N/A	#N/A	#N/A	#N/A
2018-02-15 15:00:00	7.9	2.5	8.7	2.4	#N/A	2.9	2.9	2.2	2.3	2.2	#N/A	1.8	1.8	1.8	1.8	1.8	#N/A	#N/A	#N/A	#N/A	#N/A	#N/A	#N/A	#N/A
2018-02-15 16:00:00	7.3	2.5	6.7	2.4	#N/A	3.9	3.9	2.2	2.3	2.2	#N/A	2.9	2.9	1.8	1.8	1.8	#N/A	#N/A	#N/A	#N/A	#N/A	#N/A	#N/A	#N/A
2018-02-15 17:00:00	6.4	2.5	5.5	2.4	#N/A	4.7	4.7	2.2	2.3	2.2	#N/A	4.1	4.1	1.8	1.8	1.8	#N/A	#N/A	#N/A	#N/A	#N/A	#N/A	#N/A	#N/A
2018-02-15 18:00:00	5.2	2.5	4.7	2.4	#N/A	4.2	4.2	2.2	2.3	2.2	#N/A	4	4	1.8	1.8	1.8	#N/A	#N/A	#N/A	#N/A	#N/A	#N/A	#N/A	#N/A
2018-02-15 19:00:00	4.7	2.5	4.3	2.4	#N/A	4.2	4.2	2.2	2.3	2.2	#N/A	3.6	3.6	1.8	1.8	1.8	#N/A	#N/A	#N/A	#N/A	#N/A	#N/A	#N/A	#N/A
2018-02-15 20:00:00	4.3	2.5	4.2	2.4	#N/A	4.8	4.8	2.2	2.3	2.2	#N/A	4.1	4.1	1.8	1.8	1.8	#N/A	#N/A	#N/A	#N/A	#N/A	#N/A	#N/A	#N/A
2018-02-15 21:00:00	1.9	2.5	2.8	2.4	#N/A	4.6	4.6	2.2	2.3	2.2	#N/A	4.7	4.7	1.8	1.8	1.8	#N/A	#N/A	#N/A	#N/A	#N/A	#N/A	#N/A	#N/A
2018-02-15 22:00:00	1.1	2.5	2.3	2.4	#N/A	4.5	4.5	2.2	2.3	2.2	#N/A	4.1	4.1	1.8	1.8	1.8	#N/A	#N/A	#N/A	#N/A	#N/A	#N/A	#N/A	#N/A
2018-02-15 23:00:00	0.6	2.5	2.8	2.4	#N/A	4.2	4.2	2.2	2.3	2.2	#N/A	3.6	3.6	1.8	1.8	1.8	#N/A	#N/A	#N/A	#N/A	#N/A	#N/A	#N/A	#N/A
2018-02-16	1.2	6.1	2.7	7.3	#N/A	3.9	3.9	2.2	4.5	2.2	#N/A	3.4	3.4	1.8	4.5	1.8	#N/A	#N/A	#N/A	#N/A	#N/A	#N/A	#N/A	#N/A
2018-02-16 01:00:00	0.6	6.1	2.3	7.3	#N/A	3.8	3.8	2.2	4.5	2.2	#N/A	3.3	3.3	1.8	4.5	1.8	#N/A	#N/A	#N/A	#N/A	#N/A	#N/A	#N/A	#N/A
2018-02-16 02:00:00	0.1	6.1	1.9	7.3	#N/A	3.7	3.7	2.2	4.5	2.2	#N/A	3.3	3.3	1.8	4.5	1.8	#N/A	#N/A	#N/A	#N/A	#N/A	#N/A	#N/A	#N/A
2018-02-16 03:00:00	-0.2	6.1	1.5	7.3	#N/A	3	3	2.2	4.5	2.2	#N/A	2.8	2.8	1.8	4.5	1.8	#N/A	#N/A	#N/A	#N/A	#N/A	#N/A	#N/A	#N/A
2018-02-16 04:00:00	-0.8	6.1	1.3	7.3	#N/A	2.8	2.8	2.2	4.5	2.2	#N/A	2.7	2.7	1.8	4.5	1.8	#N/A	#N/A	#N/A	#N/A	#N/A	#N/A	#N/A	#N/A
2018-02-16 05:00:00	-0.8	6.1	1.3	7.3	#N/A	2.7	2.7	2.2	4.5	2.2	#N/A	2.9	2.9	1.8	4.5	1.8	#N/A	#N/A	#N/A	#N/A	#N/A	#N/A	#N/A	#N/A
2018-02-16 06:00:00	-1.2	6.1	1.8	7.3	#N/A	2.9	2.9	2.2	4.5	2.2	#N/A	2.9	2.9	1.8	4.5	1.8	#N/A	#N/A	#N/A	#N/A	#N/A	#N/A	#N/A	#N/A
2018-02-16 07:00:00	-0.8	6.1	2.4	7.3	#N/A	2.8	2.8	2.2	4.5	2.2	#N/A	2.7	2.7	1.8	4.5	1.8	#N/A	#N/A	#N/A	#N/A	#N/A	#N/A	#N/A	#N/A
2018-02-16 08:00:00	1.4	6.1	2.9	7.3	#N/A	2.7	2.7	2.2	4.5	2.2	#N/A	2.7	2.7	1.8	4.5	1.8	#N/A	#N/A	#N/A	#N/A	#N/A	#N/A	#N/A	#N/A
2018-02-16 09:00:00	5.3	6.1	4.7	7.3	#N/A	2.6	2.6	2.2	4.5	2.2	#N/A	2.6	2.6	1.8	4.5	1.8	#N/A	#N/A	#N/A	#N/A	#N/A	#N/A	#N/A	#N/A
2018-02-16 10:00:00	10.3	6.1	8.6	7.3	#N/A	2.5	2.5	2.2	4.5	2.2	#N/A	2.6	2.6	1.8	4.5	1.8	#N/A	#N/A	#N/A	#N/A	#N/A	#N/A	#N/A	#N/A
2018-02-16 11:00:00	13.6	6.1	13.2	7.3	#N/A	2.5	2.5	2.2	4.5	2.2	#N/A	2.6	2.6	1.8	4.5	1.8	#N/A	#N/A	#N/A	#N/A	#N/A	#N/A	#N/A	#N/A
2018-02-16 12:00:00	14.4	6.1	14.6	7.3	#N/A	2.4	2.4	2.2	4.5	2.2	#N/A	2.8	2.8	1.8	4.5	1.8	#N/A	#N/A	#N/A	#N/A	#N/A	#N/A	#N/A	#N/A
2018-02-16 13:00:00	16.1	6.1	15.9	7.3	#N/A	2.6	2.6	2.2	4.5	2.2	#N/A	3.1	3.1	1.8	4.5	1.8	#N/A	#N/A	#N/A	#N/A	#N/A	#N/A	#N/A	#N/A
2018-02-16 14:00:00	15.8	6.1	15.9	7.3	#N/A	3.3	3.3	2.2	4.5	2.2	#N/A	3.3	3.3	1.8	4.5	1.8	#N/A	#N/A	#N/A	#N/A	#N/A	#N/A	#N/A	#N/A
2018-02-16 15:00:00	16.2	6.1	15.1	7.3	#N/A	4.6	4.6	2.2	4.5	2.2	#N/A	4	4	1.8	4.5	1.8	#N/A	#N/A	#N/A	#N/A	#N/A	#N/A	#N/A	#N/A
2018-02-16 16:00:00	15.5	6.1	14.5	7.3	#N/A	6.1	6.1	2.2	4.5	2.2	#N/A	5.4	5.4	1.8	4.5	1.8	#N/A	#N/A	#N/A	#N/A	#N/A	#N/A	#N/A	#N/A
2018-02-16 17:00:00	11	6.1	12.2	7.3	#N/A	7.1	7.1	2.2	4.5	2.2	#N/A	7.1	7.1	1.8	4.5	1.8	#N/A	#N/A	#N/A	#N/A	#N/A	#N/A	#N/A	#N/A
2018-02-16 18:00:00	7.3	6.1	9.4	7.3	#N/A	7.4	7.4	2.2	4.5	2.2	#N/A	7.7	7.7	1.8	4.5	1.8	#N/A	#N/A	#N/A	#N/A	#N/A	#N/A	#N/A	#N/A
2018-02-16 19:00:00	6.7	6.1	7.9	7.3	#N/A	8	8	2.2	4.5	2.2	#N/A	8.2	8.2	1.8	4.5	1.8	#N/A	#N/A	#N/A	#N/A	#N/A	#N/A	#N/A	#N/A
2018-02-16 20:00:00	4.3	6.1	6.7	7.3	#N/A	7.9	7.9	2.2	4.5	2.2	#N/A	8.3	8.3	1.8	4.5	1.8	#N/A	#N/A	#N/A	#N/A	#N/A	#N/A	#N/A	#N/A
2018-02-16 21:00:00	3.7	6.1	5.9	7.3	#N/A	8.1	8.1	2.2	4.5	2.2	#N/A	8	8	1.8	4.5	1.8	#N/A	#N/A	#N/A	#N/A	#N/A	#N/A	#N/A	#N/A
2018-02-16 22:00:00	3.3	6.1	5.6	7.3	#N/A	7.9	7.9	2.2	4.5	2.2	#N/A	7.8	7.8	1.8	4.5	1.8	#N/A	#N/A	#N/A	#N/A	#N/A	#N/A	#N/A	#N/A
2018-02-16 23:00:00	3.8	6.1	5.9	7.3	#N/A	6.6	6.6	2.2	4.5	2.2	#N/A	7.1	7.1	1.8	4.5	1.8	#N/A	#N/A	#N/A	#N/A	#N/A	#N/A	#N/A	#N/A
2018-02-17	4	5	5.7	4.6	#N/A	5.6	5.6	2.2	5.4	2.2	#N/A	6.1	6.1	1.8	5.1	1.8	#N/A	#N/A	#N/A	#N/A	#N/A	#N/A	#N/A	#N/A
2018-02-17 01:00:00	4.7	5	5.3	4.6	#N/A	5.4	5.4	2.2	5.4	2.2	#N/A	5.6	5.6	1.8	5.1	1.8	#N/A	#N/A	#N/A	#N/A	#N/A	#N/A	#N/A	#N/A
2018-02-17 02:00:00	5.1	5	5.9	4.6	#N/A	4.8	4.8	2.2	5.4	2.2	#N/A	5.2	5.2	1.8	5.1	1.8	#N/A	#N/A	#N/A	#N/A	#N/A	#N/A	#N/A	#N/A
2018-02-17 03:00:00	5.3	5	5.7	4.6	#N/A	4.6	4.6	2.2	5.4	2.2	#N/A	4.9	4.9	1.8	5.1	1.8	#N/A	#N/A	#N/A	#N/A	#N/A	#N/A	#N/A	#N/A
2018-02-17 04:00:00	5.1	5	5.6	4.6	#N/A	4.6	4.6	2.2	5.4	2.2	#N/A	4.9	4.9	1.8	5.1	1.8	#N/A	#N/A	#N/A	#N/A	#N/A	#N/A	#N/A	#N/A
2018-02-17 05:00:00	5.2	5	5.7	4.6	#N/A	4.8	4.8	2.2	5.4	2.2	#N/A	5	5	1.8	5.1	1.8	#N/A	#N/A	#N/A	#N/A	#N/A	#N/A	#N/A	#N/A
2018-02-17 06:00:00	5.5	5	5.8	4.6	#N/A	4.9	4.9	2.2	5.4	2.2	#N/A	5	5	1.8	5.1	1.8	#N/A	#N/A	#N/A	#N/A	#N/A	#N/A	#N/A	#N/A
2018-02-17 07:00:00	5.5	5	6	4.6	#N/A	5.2	5.2	2.2	5.4	2.2	#N/A	4.9	4.9	1.8	5.1	1.8	#N/A	#N/A	#N/A	#N/A	#N/A	#N/A	#N/A	#N/A
2018-02-17 08:00:00	6	5	5.9	4.6	#N/A	5.3	5.3	2.2	5.4	2.2	#N/A	5.2	5.2	1.8	5.1	1.8	#N/A	#N/A	#N/A	#N/A	#N/A	#N/A	#N/A	#N/A
2018-02-17 09:00:00	6.1	5	5.5	4.6	#N/A	5.4	5.4	2.2	5.4	2.2	#N/A	5.2	5.2	1.8	5.1	1.8	#N/A	#N/A	#N/A	#N/A	#N/A	#N/A	#N/A	#N/A
2018-02-17 10:00:00	6.3	5	5.3	4.6	#N/A	5.4	5.4	2.2	5.4	2.2	#N/A	5.2	5.2	1.8	5.1	1.8	#N/A	#N/A	#N/A	#N/A	#N/A	#N/A	#N/A	#N/A
2018-02-17 11:00:00	6.2	5	5.3	4.6	#N/A	5.4	5.4	2.2	5.4	2.2	#N/A	5.2	5.2	1.8	5.1	1.8	#N/A	#N/A	#N/A	#N/A	#N/A	#N/A	#N/A	#N/A
2018-02-17 12:00:00	6.5	5	5.2	4.6	#N/A	5.5	5.5	2.2	5.4	2.2	#N/A	5.3	5.3	1.8	5.1	1.8	#N/A	#N/A	#N/A	#N/A	#N/A	#N/A	#N/A	#N/A
2018-02-17 13:00:00	6.2	5	5.1	4.6	#N/A	5.5	5.5	2.2	5.4	2.2	#N/A	5.3	5.3	1.8	5.1	1.8	#N/A	#N/A	#N/A	#N/A	#N/A	#N/A	#N/A	#N/A
2018-02-17 14:00:00	6.1	5	4.9	4.6	#N/A	5.6	5.6	2.2	5.4	2.2	#N/A	5.3	5.3	1.8	5.1	1.8	#N/A	#N/A	#N/A	#N/A	#N/A	#N/A	#N/A	#N/A
2018-02-17 15:00:00	6	5	5.2	4.6	#N/A	5.7	5.7	2.2	5.4	2.2	#N/A	5.1	5.1	1.8	5.1	1.8	#N/A	#N/A	#N/A	#N/A	#N/A	#N/A	#N/A	#N/A
2018-02-17 16:00:00	5.9	5	5	4.6	#N/A	5.7	5.7	2.2	5.4	2.2	#N/A	5	5	1.8	5.1	1.8	#N/A	#N/A	#N/A	#N/A	#N/A	#N/A	#N/A	#N/A
2018-02-17 17:00:00	5.8	5	4.8	4.6	#N/A	5.7	5.7	2.2	5.4	2.2	#N/A	5	5	1.8	5.1	1.8	#N/A	#N/A	#N/A	#N/A	#N/A	#N/A	#N/A	#N/A
2018-02-17 18:00:00	5.4	5	4.2	4.6	#N/A	5.8	5.8	2.2	5.4	2.2	#N/A	5	5	1.8	5.1	1.8	#N/A	#N/A	#N/A	#N/A	#N/A	#N/A	#N/A	#N/A
2018-02-17 19:00:00	4.5	5	3.3	4.6	#N/A	5.8	5.8	2.2	5.4	2.2	#N/A	5	5	1.8	5.1	1.8	#N/A	#N/A	#N/A	#N/A	#N/A	#N/A	#N/A	#N/A
2018-02-17 20:00:00	4.2	5	2.9	4.6	#N/A	5.8	5.8	2.2	5.4	2.2	#N/A	5	5	1.8	5.1	1.8	#N/A	#N/A	#N/A	#N/A	#N/A	#N/A	#N/A	#N/A
2018-02-17 21:00:00	3.2	5	2.4	4.6	#N/A	5.8	5.8	2.2	5.4	2.2	#N/A	5.1	5.1	1.8	5.1	1.8	#N/A	#N/A	#N/A	#N/A	#N/A	#N/A	#N/A	#N/A
2018-02-17 22:00:00	1.6	5	1.1	4.6	#N/A	5.8	5.8	2.2	5.4	2.2	#N/A	5.1	5.1	1.8	5.1	1.8	#N/A	#N/A	#N/A	#N/A	#N/A	#N/A	#N/A	#N/A
2018-02-17 23:00:00	0.4	5	-0.3	4.6	#N/A	5.8	5.8	2.2	5.4	2.2	#N/A	5	5	1.8	5.1	1.8	#N/A	#N/A	#N/A	#N/A	#N/A	#N/A	#N/A	#N/A
2018-02-18	0.6	3.4	-0.7	2.4	#N/A	5.7	5.7	2.2	5.4	2.2	#N/A	4.8	4.8	1.8	4.4	1.8	#N/A	#N/A	#N/A	#N/A	#N/A	#N/A	#N/A	#N/A
2018-02-18 01:00:00	-0.7	3.4	-1.1	2.4	#N/A	5.5	5.5	2.2	5.4	2.2	#N/A	4.5	4.5	1.8	4.4	1.8	#N/A	#N/A	#N/A	#N/A	#N/A	#N/A	#N/A	#N/A
2018-02-18 02:00:00	-0.8	3.4	-1.5	2.4	#N/A	5.4	5.4	2.2	5.4	2.2	#N/A	4.4	4.4	1.8	4.4	1.8	#N/A	#N/A	#N/A	#N/A	#N/A	#N/A	#N/A	#N/A
2018-02-18 03:00:00	-0.8	3.4	-2	2.4	#N/A	5.1	5.1	2.2	5.4	2.2	#N/A	4.2	4.2	1.8	4.4	1.8	#N/A	#N/A	#N/A	#N/A	#N/A	#N/A	#N/A	#N/A
2018-02-18 04:00:00	-1.5	3.4	-2.3	2.4	#N/A	4.7	4.7	2.2	5.4	2.2	#N/A	3.8	3.8	1.8	4.4	1.8	#N/A	#N/A	#N/A	#N/A	#N/A	#N/A	#N/A	#N/A
2018-02-18 05:00:00	-1.6	3.4	-2.4	2.4	#N/A	4.3	4.3	2.2	5.4	2.2	#N/A	3.3	3.3	1.8	4.4	1.8	#N/A	#N/A	#N/A	#N/A	#N/A	#N/A	#N/A	#N/A
2018-02-18 06:00:00	-1.7	3.4	-2.3	2.4	#N/A	4.4	4.4	2.2	5.4	2.2	#N/A	3.2	3.2	1.8	4.4	1.8	#N/A	#N/A	#N/A	#N/A	#N/A	#N/A	#N/A	#N/A
2018-02-18 07:00:00	-2	3.4	-2.4	2.4	#N/A	4	4	2.2	5.4	2.2	#N/A	3	3	1.8	4.4	1.8	#N/A	#N/A	#N/A	#N/A	#N/A	#N/A	#N/A	#N/A
2018-02-18 08:00:00	-1.1	3.4	-2.3	2.4	#N/A	4	4	2.2	5.4	2.2	#N/A	2.9	2.9	1.8	4.4	1.8	#N/A	#N/A	#N/A	#N/A	#N/A	#N/A	#N/A	#N/A
2018-02-18 09:00:00	3.4	3.4	-2.1	2.4	#N/A	4.1	4.1	2.2	5.4	2.2	#N/A	2.8	2.8	1.8	4.4	1.8	#N/A	#N/A	#N/A	#N/A	#N/A	#N/A	#N/A	#N/A
2018-02-18 10:00:00	5.8	3.4	1.1	2.4	#N/A	3.9	3.9	2.2	5.4	2.2	#N/A	2.6	2.6	1.8	4.4	1.8	#N/A	#N/A	#N/A	#N/A	#N/A	#N/A	#N/A	#N/A
2018-02-18 11:00:00	8.6	3.4	6	2.4	#N/A	3.9	3.9	2.2	5.4	2.2	#N/A	2.6	2.6	1.8	4.4	1.8	#N/A	#N/A	#N/A	#N/A	#N/A	#N/A	#N/A	#N/A
2018-02-18 12:00:00	9.2	3.4	9.2	2.4	#N/A	3.8	3.8	2.2	5.4	2.2	#N/A	2.7	2.7	1.8	4.4	1.8	#N/A	#N/A	#N/A	#N/A	#N/A	#N/A	#N/A	#N/A
2018-02-18 13:00:00	11.3	3.4	11.1	2.4	#N/A	3.8	3.8	2.2	5.4	2.2	#N/A	2.6	2.6	1.8	4.4	1.8	#N/A	#N/A	#N/A	#N/A	#N/A	#N/A	#N/A	#N/A
2018-02-18 14:00:00	11	3.4	11	2.4	#N/A	4	4	2.2	5.4	2.2	#N/A	2.7	2.7	1.8	4.4	1.8	#N/A	#N/A	#N/A	#N/A	#N/A	#N/A	#N/A	#N/A
2018-02-18 15:00:00	10.5	3.4	10.3	2.4	#N/A	5.4	5.4	2.2	5.4	2.2	#N/A	2.7	2.7	1.8	4.4	1.8	#N/A	#N/A	#N/A	#N/A	#N/A	#N/A	#N/A	#N/A
2018-02-18 16:00:00	9.8	3.4	9.2	2.4	#N/A	6.1	6.1	2.2	5.4	2.2	#N/A	3.9	3.9	1.8	4.4	1.8	#N/A	#N/A	#N/A	#N/A	#N/A	#N/A	#N/A	#N/A
2018-02-18 17:00:00	7.1	3.4	6.6	2.4	#N/A	7	7	2.2	5.4	2.2	#N/A	5.7	5.7	1.8	4.4	1.8	#N/A	#N/A	#N/A	#N/A	#N/A	#N/A	#N/A	#N/A
2018-02-18 18:00:00	4.7	3.4	4.5	2.4	#N/A	7.1	7.1	2.2	5.4	2.2	#N/A	6.9	6.9	1.8	4.4	1.8	#N/A	#N/A	#N/A	#N/A	#N/A	#N/A	#N/A	#N/A
2018-02-18 19:00:00	3.6	3.4	3.5	2.4	#N/A	7.8	7.8	2.2	5.4	2.2	#N/A	7.6	7.6	1.8	4.4	1.8	#N/A	#N/A	#N/A	#N/A	#N/A	#N/A	#N/A	#N/A
2018-02-18 20:00:00	3.1	3.4	2.6	2.4	#N/A	7.7	7.7	2.2	5.4	2.2	#N/A	7.5	7.5	1.8	4.4	1.8	#N/A	#N/A	#N/A	#N/A	#N/A	#N/A	#N/A	#N/A
2018-02-18 21:00:00	2.2	3.4	1.5	2.4	#N/A	7.5	7.5	2.2	5.4	2.2	#N/A	7.3	7.3	1.8	4.4	1.8	#N/A	#N/A	#N/A	#N/A	#N/A	#N/A	#N/A	#N/A
2018-02-18 22:00:00	0.6	3.4	0.6	2.4	#N/A	7.3	7.3	2.2	5.4	2.2	#N/A	6.9	6.9	1.8	4.4	1.8	#N/A	#N/A	#N/A	#N/A	#N/A	#N/A	#N/A	#N/A
2018-02-18 23:00:00	-0.9	3.4	-0.4	2.4	#N/A	6.5	6.5	2.2	5.4	2.2	#N/A	5.9	5.9	1.8	4.4	1.8	#N/A	#N/A	#N/A	#N/A	#N/A	#N/A	#N/A	#N/A
2018-02-19	-1.3	1.6	-0.5	1.3	#N/A	5.8	5.8	2.2	5.2	2.2	#N/A	5.1	5.1	1.8	4.3	1.8	#N/A	#N/A	#N/A	#N/A	#N/A	#N/A	#N/A	#N/A
2018-02-19 01:00:00	-1.1	1.6	0.3	1.3	#N/A	5.4	5.4	2.2	5.2	2.2	#N/A	4.8	4.8	1.8	4.3	1.8	#N/A	#N/A	#N/A	#N/A	#N/A	#N/A	#N/A	#N/A
2018-02-19 02:00:00	-1.5	1.6	-0.2	1.3	#N/A	5.3	5.3	2.2	5.2	2.2	#N/A	4.5	4.5	1.8	4.3	1.8	#N/A	#N/A	#N/A	#N/A	#N/A	#N/A	#N/A	#N/A
2018-02-19 03:00:00	-1.4	1.6	-1	1.3	#N/A	5	5	2.2	5.2	2.2	#N/A	4.1	4.1	1.8	4.3	1.8	#N/A	#N/A	#N/A	#N/A	#N/A	#N/A	#N/A	#N/A
2018-02-19 04:00:00	-2.2	1.6	-1.9	1.3	#N/A	4.5	4.5	2.2	5.2	2.2	#N/A	3.7	3.7	1.8	4.3	1.8	#N/A	#N/A	#N/A	#N/A	#N/A	#N/A	#N/A	#N/A
2018-02-19 05:00:00	-1.9	1.6	-1.8	1.3	#N/A	4.1	4.1	2.2	5.2	2.2	#N/A	3.4	3.4	1.8	4.3	1.8	#N/A	#N/A	#N/A	#N/A	#N/A	#N/A	#N/A	#N/A
2018-02-19 06:00:00	-1.7	1.6	-1.5	1.3	#N/A	4	4	2.2	5.2	2.2	#N/A	3.4	3.4	1.8	4.3	1.8	#N/A	#N/A	#N/A	#N/A	#N/A	#N/A	#N/A	#N/A
2018-02-19 07:00:00	-1.1	1.6	-1.5	1.3	#N/A	4.1	4.1	2.2	5.2	2.2	#N/A	3.7	3.7	1.8	4.3	1.8	#N/A	#N/A	#N/A	#N/A	#N/A	#N/A	#N/A	#N/A
2018-02-19 08:00:00	0.3	1.6	-0.4	1.3	#N/A	4	4	2.2	5.2	2.2	#N/A	3.5	3.5	1.8	4.3	1.8	#N/A	#N/A	#N/A	#N/A	#N/A	#N/A	#N/A	#N/A
2018-02-19 09:00:00	4.5	1.6	0.3	1.3	#N/A	4	4	2.2	5.2	2.2	#N/A	3.2	3.2	1.8	4.3	1.8	#N/A	#N/A	#N/A	#N/A	#N/A	#N/A	#N/A	#N/A
2018-02-19 10:00:00	6.5	1.6	2.7	1.3	#N/A	3.8	3.8	2.2	5.2	2.2	#N/A	2.9	2.9	1.8	4.3	1.8	#N/A	#N/A	#N/A	#N/A	#N/A	#N/A	#N/A	#N/A
2018-02-19 11:00:00	6.1	1.6	3.9	1.3	#N/A	3.9	3.9	2.2	5.2	2.2	#N/A	3	3	1.8	4.3	1.8	#N/A	#N/A	#N/A	#N/A	#N/A	#N/A	#N/A	#N/A
2018-02-19 12:00:00	6.6	1.6	5	1.3	#N/A	3.9	3.9	2.2	5.2	2.2	#N/A	3.1	3.1	1.8	4.3	1.8	#N/A	#N/A	#N/A	#N/A	#N/A	#N/A	#N/A	#N/A
2018-02-19 13:00:00	7.2	1.6	5.7	1.3	#N/A	4.1	4.1	2.2	5.2	2.2	#N/A	3.1	3.1	1.8	4.3	1.8	#N/A	#N/A	#N/A	#N/A	#N/A	#N/A	#N/A	#N/A
2018-02-19 14:00:00	7.9	1.6	8.8	1.3	#N/A	4.6	4.6	2.2	5.2	2.2	#N/A	3.5	3.5	1.8	4.3	1.8	#N/A	#N/A	#N/A	#N/A	#N/A	#N/A	#N/A	#N/A
2018-02-19 15:00:00	8	1.6	8.4	1.3	#N/A	5.8	5.8	2.2	5.2	2.2	#N/A	3.8	3.8	1.8	4.3	1.8	#N/A	#N/A	#N/A	#N/A	#N/A	#N/A	#N/A	#N/A
2018-02-19 16:00:00	6.9	1.6	5.6	1.3	#N/A	6.4	6.4	2.2	5.2	2.2	#N/A	4.6	4.6	1.8	4.3	1.8	#N/A	#N/A	#N/A	#N/A	#N/A	#N/A	#N/A	#N/A
2018-02-19 17:00:00	5.4	1.6	3.7	1.3	#N/A	6.3	6.3	2.2	5.2	2.2	#N/A	5.1	5.1	1.8	4.3	1.8	#N/A	#N/A	#N/A	#N/A	#N/A	#N/A	#N/A	#N/A
2018-02-19 18:00:00	1.6	1.6	2.1	1.3	#N/A	6.5	6.5	2.2	5.2	2.2	#N/A	5.5	5.5	1.8	4.3	1.8	#N/A	#N/A	#N/A	#N/A	#N/A	#N/A	#N/A	#N/A
2018-02-19 19:00:00	-0.2	1.6	0.1	1.3	#N/A	6.7	6.7	2.2	5.2	2.2	#N/A	5.8	5.8	1.8	4.3	1.8	#N/A	#N/A	#N/A	#N/A	#N/A	#N/A	#N/A	#N/A
2018-02-19 20:00:00	-1.6	1.6	-1.1	1.3	#N/A	6.9	6.9	2.2	5.2	2.2	#N/A	6.9	6.9	1.8	4.3	1.8	#N/A	#N/A	#N/A	#N/A	#N/A	#N/A	#N/A	#N/A
2018-02-19 21:00:00	-2.2	1.6	-1.7	1.3	#N/A	6.9	6.9	2.2	5.2	2.2	#N/A	6.8	6.8	1.8	4.3	1.8	#N/A	#N/A	#N/A	#N/A	#N/A	#N/A	#N/A	#N/A
2018-02-19 22:00:00	-2.7	1.6	-1.9	1.3	#N/A	6.6	6.6	2.2	5.2	2.2	#N/A	5.8	5.8	1.8	4.3	1.8	#N/A	#N/A	#N/A	#N/A	#N/A	#N/A	#N/A	#N/A
2018-02-19 23:00:00	-2.8	1.6	-2.6	1.3	#N/A	6.2	6.2	2.2	5.2	2.2	#N/A	5.1	5.1	1.8	4.3	1.8	#N/A	#N/A	#N/A	#N/A	#N/A	#N/A	#N/A	#N/A
2018-02-20	-2.9	0.5	-3.2	-0.2	#N/A	5	5	2.2	4.9	2.2	#N/A	4.5	4.5	1.8	3.9	1.8	#N/A	#N/A	#N/A	#N/A	#N/A	#N/A	#N/A	#N/A
2018-02-20 01:00:00	-3	0.5	-3.6	-0.2	#N/A	4.5	4.5	2.2	4.9	2.2	#N/A	3.8	3.8	1.8	3.9	1.8	#N/A	#N/A	#N/A	#N/A	#N/A	#N/A	#N/A	#N/A
2018-02-20 02:00:00	-3.1	0.5	-3.7	-0.2	#N/A	4.1	4.1	2.2	4.9	2.2	#N/A	3.4	3.4	1.8	3.9	1.8	#N/A	#N/A	#N/A	#N/A	#N/A	#N/A	#N/A	#N/A
2018-02-20 03:00:00	-3.4	0.5	-4	-0.2	#N/A	3.9	3.9	2.2	4.9	2.2	#N/A	3.2	3.2	1.8	3.9	1.8	#N/A	#N/A	#N/A	#N/A	#N/A	#N/A	#N/A	#N/A
2018-02-20 04:00:00	-3.7	0.5	-4.5	-0.2	#N/A	3.8	3.8	2.2	4.9	2.2	#N/A	3.1	3.1	1.8	3.9	1.8	#N/A	#N/A	#N/A	#N/A	#N/A	#N/A	#N/A	#N/A
2018-02-20 05:00:00	-4.2	0.5	-5	-0.2	#N/A	3.8	3.8	2.2	4.9	2.2	#N/A	2.9	2.9	1.8	3.9	1.8	#N/A	#N/A	#N/A	#N/A	#N/A	#N/A	#N/A	#N/A
2018-02-20 06:00:00	-4.5	0.5	-5.2	-0.2	#N/A	3.7	3.7	2.2	4.9	2.2	#N/A	2.7	2.7	1.8	3.9	1.8	#N/A	#N/A	#N/A	#N/A	#N/A	#N/A	#N/A	#N/A
2018-02-20 07:00:00	-4.9	0.5	-5.2	-0.2	#N/A	3.7	3.7	2.2	4.9	2.2	#N/A	2.5	2.5	1.8	3.9	1.8	#N/A	#N/A	#N/A	#N/A	#N/A	#N/A	#N/A	#N/A
2018-02-20 08:00:00	-4	0.5	-4.7	-0.2	#N/A	3.7	3.7	2.2	4.9	2.2	#N/A	2.5	2.5	1.8	3.9	1.8	#N/A	#N/A	#N/A	#N/A	#N/A	#N/A	#N/A	#N/A
2018-02-20 09:00:00	2.9	0.5	-4.5	-0.2	#N/A	3.6	3.6	2.2	4.9	2.2	#N/A	2.4	2.4	1.8	3.9	1.8	#N/A	#N/A	#N/A	#N/A	#N/A	#N/A	#N/A	#N/A
2018-02-20 10:00:00	3.5	0.5	1.1	-0.2	#N/A	3.5	3.5	2.2	4.9	2.2	#N/A	2.2	2.2	1.8	3.9	1.8	#N/A	#N/A	#N/A	#N/A	#N/A	#N/A	#N/A	#N/A
2018-02-20 11:00:00	5.2	0.5	4.6	-0.2	#N/A	3.4	3.4	2.2	4.9	2.2	#N/A	2.1	2.1	1.8	3.9	1.8	#N/A	#N/A	#N/A	#N/A	#N/A	#N/A	#N/A	#N/A
2018-02-20 12:00:00	6.7	0.5	6.4	-0.2	#N/A	3.3	3.3	2.2	4.9	2.2	#N/A	2	2	1.8	3.9	1.8	#N/A	#N/A	#N/A	#N/A	#N/A	#N/A	#N/A	#N/A
2018-02-20 13:00:00	7.3	0.5	8.1	-0.2	#N/A	3.2	3.2	2.2	4.9	2.2	#N/A	2.1	2.1	1.8	3.9	1.8	#N/A	#N/A	#N/A	#N/A	#N/A	#N/A	#N/A	#N/A
2018-02-20 14:00:00	8.3	0.5	8.8	-0.2	#N/A	3.5	3.5	2.2	4.9	2.2	#N/A	2.3	2.3	1.8	3.9	1.8	#N/A	#N/A	#N/A	#N/A	#N/A	#N/A	#N/A	#N/A
2018-02-20 15:00:00	8.2	0.5	7.5	-0.2	#N/A	5.6	5.6	2.2	4.9	2.2	#N/A	2.4	2.4	1.8	3.9	1.8	#N/A	#N/A	#N/A	#N/A	#N/A	#N/A	#N/A	#N/A
2018-02-20 16:00:00	8.2	0.5	6.3	-0.2	#N/A	5.8	5.8	2.2	4.9	2.2	#N/A	4.4	4.4	1.8	3.9	1.8	#N/A	#N/A	#N/A	#N/A	#N/A	#N/A	#N/A	#N/A
2018-02-20 17:00:00	5.7	0.5	5.7	-0.2	#N/A	6.4	6.4	2.2	4.9	2.2	#N/A	5.7	5.7	1.8	3.9	1.8	#N/A	#N/A	#N/A	#N/A	#N/A	#N/A	#N/A	#N/A
2018-02-20 18:00:00	1	0.5	2.2	-0.2	#N/A	6.8	6.8	2.2	4.9	2.2	#N/A	6.3	6.3	1.8	3.9	1.8	#N/A	#N/A	#N/A	#N/A	#N/A	#N/A	#N/A	#N/A
2018-02-20 19:00:00	-1.1	0.5	-0.4	-0.2	#N/A	7	7	2.2	4.9	2.2	#N/A	7	7	1.8	3.9	1.8	#N/A	#N/A	#N/A	#N/A	#N/A	#N/A	#N/A	#N/A
2018-02-20 20:00:00	-1.7	0.5	-1.8	-0.2	#N/A	7.3	7.3	2.2	4.9	2.2	#N/A	7.2	7.2	1.8	3.9	1.8	#N/A	#N/A	#N/A	#N/A	#N/A	#N/A	#N/A	#N/A
2018-02-20 21:00:00	-2.7	0.5	-2.8	-0.2	#N/A	7.2	7.2	2.2	4.9	2.2	#N/A	6.8	6.8	1.8	3.9	1.8	#N/A	#N/A	#N/A	#N/A	#N/A	#N/A	#N/A	#N/A
2018-02-20 22:00:00	-3	0.5	-3.3	-0.2	#N/A	7.2	7.2	2.2	4.9	2.2	#N/A	6.4	6.4	1.8	3.9	1.8	#N/A	#N/A	#N/A	#N/A	#N/A	#N/A	#N/A	#N/A
2018-02-20 23:00:00	-3.7	0.5	-3.6	-0.2	#N/A	6.5	6.5	2.2	4.9	2.2	#N/A	6.1	6.1	1.8	3.9	1.8	#N/A	#N/A	#N/A	#N/A	#N/A	#N/A	#N/A	#N/A
2018-02-21	-4	0	-4	-0.3	#N/A	5.1	5.1	2.2	5	2.2	#N/A	4.9	4.9	1.8	4.2	1.8	#N/A	#N/A	#N/A	#N/A	#N/A	#N/A	#N/A	#N/A
2018-02-21 01:00:00	-3.9	0	-4.7	-0.3	#N/A	4.4	4.4	2.2	5	2.2	#N/A	3.9	3.9	1.8	4.2	1.8	#N/A	#N/A	#N/A	#N/A	#N/A	#N/A	#N/A	#N/A
2018-02-21 02:00:00	-3.7	0	-4.8	-0.3	#N/A	4.3	4.3	2.2	5	2.2	#N/A	3.4	3.4	1.8	4.2	1.8	#N/A	#N/A	#N/A	#N/A	#N/A	#N/A	#N/A	#N/A
2018-02-21 03:00:00	-2.3	0	-3.7	-0.3	#N/A	4	4	2.2	5	2.2	#N/A	3.1	3.1	1.8	4.2	1.8	#N/A	#N/A	#N/A	#N/A	#N/A	#N/A	#N/A	#N/A
2018-02-21 04:00:00	-1.8	0	-2.9	-0.3	#N/A	3.9	3.9	2.2	5	2.2	#N/A	2.9	2.9	1.8	4.2	1.8	#N/A	#N/A	#N/A	#N/A	#N/A	#N/A	#N/A	#N/A
2018-02-21 05:00:00	-2.2	0	-3.1	-0.3	#N/A	3.8	3.8	2.2	5	2.2	#N/A	2.8	2.8	1.8	4.2	1.8	#N/A	#N/A	#N/A	#N/A	#N/A	#N/A	#N/A	#N/A
2018-02-21 06:00:00	-2.9	0	-3.9	-0.3	#N/A	3.7	3.7	2.2	5	2.2	#N/A	2.7	2.7	1.8	4.2	1.8	#N/A	#N/A	#N/A	#N/A	#N/A	#N/A	#N/A	#N/A
2018-02-21 07:00:00	-4	0	-4.7	-0.3	#N/A	3.7	3.7	2.2	5	2.2	#N/A	2.5	2.5	1.8	4.2	1.8	#N/A	#N/A	#N/A	#N/A	#N/A	#N/A	#N/A	#N/A
2018-02-21 08:00:00	-3.1	0	-5.1	-0.3	#N/A	3.8	3.8	2.2	5	2.2	#N/A	2.5	2.5	1.8	4.2	1.8	#N/A	#N/A	#N/A	#N/A	#N/A	#N/A	#N/A	#N/A
2018-02-21 09:00:00	2.7	0	-4.5	-0.3	#N/A	4.3	4.3	2.2	5	2.2	#N/A	2.9	2.9	1.8	4.2	1.8	#N/A	#N/A	#N/A	#N/A	#N/A	#N/A	#N/A	#N/A
2018-02-21 10:00:00	4.8	0	0.8	-0.3	#N/A	4.4	4.4	2.2	5	2.2	#N/A	3.2	3.2	1.8	4.2	1.8	#N/A	#N/A	#N/A	#N/A	#N/A	#N/A	#N/A	#N/A
2018-02-21 11:00:00	6.1	0	5.8	-0.3	#N/A	4.3	4.3	2.2	5	2.2	#N/A	3.1	3.1	1.8	4.2	1.8	#N/A	#N/A	#N/A	#N/A	#N/A	#N/A	#N/A	#N/A
2018-02-21 12:00:00	5.1	0	7.5	-0.3	#N/A	4.1	4.1	2.2	5	2.2	#N/A	2.8	2.8	1.8	4.2	1.8	#N/A	#N/A	#N/A	#N/A	#N/A	#N/A	#N/A	#N/A
2018-02-21 13:00:00	6.6	0	7.2	-0.3	#N/A	3.8	3.8	2.2	5	2.2	#N/A	2.5	2.5	1.8	4.2	1.8	#N/A	#N/A	#N/A	#N/A	#N/A	#N/A	#N/A	#N/A
2018-02-21 14:00:00	5.7	0	7	-0.3	#N/A	4	4	2.2	5	2.2	#N/A	2.4	2.4	1.8	4.2	1.8	#N/A	#N/A	#N/A	#N/A	#N/A	#N/A	#N/A	#N/A
2018-02-21 15:00:00	5.7	0	8.1	-0.3	#N/A	5.8	5.8	2.2	5	2.2	#N/A	2.6	2.6	1.8	4.2	1.8	#N/A	#N/A	#N/A	#N/A	#N/A	#N/A	#N/A	#N/A
2018-02-21 16:00:00	6.4	0	7.2	-0.3	#N/A	6.4	6.4	2.2	5	2.2	#N/A	4.6	4.6	1.8	4.2	1.8	#N/A	#N/A	#N/A	#N/A	#N/A	#N/A	#N/A	#N/A
2018-02-21 17:00:00	4	0	4.2	-0.3	#N/A	6.8	6.8	2.2	5	2.2	#N/A	6.4	6.4	1.8	4.2	1.8	#N/A	#N/A	#N/A	#N/A	#N/A	#N/A	#N/A	#N/A
2018-02-21 18:00:00	-0.3	0	0.5	-0.3	#N/A	6.5	6.5	2.2	5	2.2	#N/A	7	7	1.8	4.2	1.8	#N/A	#N/A	#N/A	#N/A	#N/A	#N/A	#N/A	#N/A
2018-02-21 19:00:00	-2.4	0	-1.4	-0.3	#N/A	6.9	6.9	2.2	5	2.2	#N/A	6.9	6.9	1.8	4.2	1.8	#N/A	#N/A	#N/A	#N/A	#N/A	#N/A	#N/A	#N/A
2018-02-21 20:00:00	-3.4	0	-2.5	-0.3	#N/A	6.7	6.7	2.2	5	2.2	#N/A	6.8	6.8	1.8	4.2	1.8	#N/A	#N/A	#N/A	#N/A	#N/A	#N/A	#N/A	#N/A
2018-02-21 21:00:00	-3.7	0	-3.2	-0.3	#N/A	6.7	6.7	2.2	5	2.2	#N/A	7.2	7.2	1.8	4.2	1.8	#N/A	#N/A	#N/A	#N/A	#N/A	#N/A	#N/A	#N/A
2018-02-21 22:00:00	-4.2	0	-3.7	-0.3	#N/A	6.9	6.9	2.2	5	2.2	#N/A	6.9	6.9	1.8	4.2	1.8	#N/A	#N/A	#N/A	#N/A	#N/A	#N/A	#N/A	#N/A
2018-02-21 23:00:00	-4.7	0	-4.3	-0.3	#N/A	6.2	6.2	2.2	5	2.2	#N/A	5.8	5.8	1.8	4.2	1.8	#N/A	#N/A	#N/A	#N/A	#N/A	#N/A	#N/A	#N/A
2018-02-22	-5	-1.3	-5	-1.7	#N/A	4.9	4.9	2.2	4.4	2.2	#N/A	4.4	4.4	1.8	3.5	1.8	#N/A	#N/A	#N/A	#N/A	#N/A	#N/A	#N/A	#N/A
2018-02-22 01:00:00	-5.5	-1.3	-5.3	-1.7	#N/A	4.3	4.3	2.2	4.4	2.2	#N/A	3.7	3.7	1.8	3.5	1.8	#N/A	#N/A	#N/A	#N/A	#N/A	#N/A	#N/A	#N/A
2018-02-22 02:00:00	-5.9	-1.3	-5.6	-1.7	#N/A	4	4	2.2	4.4	2.2	#N/A	3.3	3.3	1.8	3.5	1.8	#N/A	#N/A	#N/A	#N/A	#N/A	#N/A	#N/A	#N/A
2018-02-22 03:00:00	-5.7	-1.3	-5.4	-1.7	#N/A	3.8	3.8	2.2	4.4	2.2	#N/A	3.1	3.1	1.8	3.5	1.8	#N/A	#N/A	#N/A	#N/A	#N/A	#N/A	#N/A	#N/A
2018-02-22 04:00:00	-5.3	-1.3	-5	-1.7	#N/A	3.7	3.7	2.2	4.4	2.2	#N/A	2.8	2.8	1.8	3.5	1.8	#N/A	#N/A	#N/A	#N/A	#N/A	#N/A	#N/A	#N/A
2018-02-22 05:00:00	-4.7	-1.3	-4.7	-1.7	#N/A	3.5	3.5	2.2	4.4	2.2	#N/A	2.6	2.6	1.8	3.5	1.8	#N/A	#N/A	#N/A	#N/A	#N/A	#N/A	#N/A	#N/A
2018-02-22 06:00:00	-5.1	-1.3	-4.9	-1.7	#N/A	3.4	3.4	2.2	4.4	2.2	#N/A	2.3	2.3	1.8	3.5	1.8	#N/A	#N/A	#N/A	#N/A	#N/A	#N/A	#N/A	#N/A
2018-02-22 07:00:00	-4.4	-1.3	-4.6	-1.7	#N/A	3.2	3.2	2.2	4.4	2.2	#N/A	2.2	2.2	1.8	3.5	1.8	#N/A	#N/A	#N/A	#N/A	#N/A	#N/A	#N/A	#N/A
2018-02-22 08:00:00	-2.8	-1.3	-3.4	-1.7	#N/A	3.1	3.1	2.2	4.4	2.2	#N/A	2.1	2.1	1.8	3.5	1.8	#N/A	#N/A	#N/A	#N/A	#N/A	#N/A	#N/A	#N/A
2018-02-22 09:00:00	0.2	-1.3	-1.6	-1.7	#N/A	3.1	3.1	2.2	4.4	2.2	#N/A	2.2	2.2	1.8	3.5	1.8	#N/A	#N/A	#N/A	#N/A	#N/A	#N/A	#N/A	#N/A
2018-02-22 10:00:00	2.6	-1.3	0.7	-1.7	#N/A	3.2	3.2	2.2	4.4	2.2	#N/A	2.3	2.3	1.8	3.5	1.8	#N/A	#N/A	#N/A	#N/A	#N/A	#N/A	#N/A	#N/A
2018-02-22 11:00:00	3.3	-1.3	1.8	-1.7	#N/A	3.4	3.4	2.2	4.4	2.2	#N/A	2.4	2.4	1.8	3.5	1.8	#N/A	#N/A	#N/A	#N/A	#N/A	#N/A	#N/A	#N/A
2018-02-22 12:00:00	4.1	-1.3	3.5	-1.7	#N/A	3.3	3.3	2.2	4.4	2.2	#N/A	2.3	2.3	1.8	3.5	1.8	#N/A	#N/A	#N/A	#N/A	#N/A	#N/A	#N/A	#N/A
2018-02-22 13:00:00	5.9	-1.3	3.2	-1.7	#N/A	3.4	3.4	2.2	4.4	2.2	#N/A	2.4	2.4	1.8	3.5	1.8	#N/A	#N/A	#N/A	#N/A	#N/A	#N/A	#N/A	#N/A
2018-02-22 14:00:00	5.1	-1.3	3.4	-1.7	#N/A	3.9	3.9	2.2	4.4	2.2	#N/A	2.8	2.8	1.8	3.5	1.8	#N/A	#N/A	#N/A	#N/A	#N/A	#N/A	#N/A	#N/A
2018-02-22 15:00:00	6	-1.3	4.4	-1.7	#N/A	4.8	4.8	2.2	4.4	2.2	#N/A	3.4	3.4	1.8	3.5	1.8	#N/A	#N/A	#N/A	#N/A	#N/A	#N/A	#N/A	#N/A
2018-02-22 16:00:00	4.2	-1.3	3.4	-1.7	#N/A	5.5	5.5	2.2	4.4	2.2	#N/A	4.2	4.2	1.8	3.5	1.8	#N/A	#N/A	#N/A	#N/A	#N/A	#N/A	#N/A	#N/A
2018-02-22 17:00:00	2.5	-1.3	1.6	-1.7	#N/A	5.7	5.7	2.2	4.4	2.2	#N/A	4.6	4.6	1.8	3.5	1.8	#N/A	#N/A	#N/A	#N/A	#N/A	#N/A	#N/A	#N/A
2018-02-22 18:00:00	-0.8	-1.3	-0.3	-1.7	#N/A	5.9	5.9	2.2	4.4	2.2	#N/A	5.2	5.2	1.8	3.5	1.8	#N/A	#N/A	#N/A	#N/A	#N/A	#N/A	#N/A	#N/A
2018-02-22 19:00:00	-2.6	-1.3	-1.9	-1.7	#N/A	6.3	6.3	2.2	4.4	2.2	#N/A	5.1	5.1	1.8	3.5	1.8	#N/A	#N/A	#N/A	#N/A	#N/A	#N/A	#N/A	#N/A
2018-02-22 20:00:00	-3.1	-1.3	-2.9	-1.7	#N/A	6.1	6.1	2.2	4.4	2.2	#N/A	5.1	5.1	1.8	3.5	1.8	#N/A	#N/A	#N/A	#N/A	#N/A	#N/A	#N/A	#N/A
2018-02-22 21:00:00	-3.5	-1.3	-3.4	-1.7	#N/A	6.3	6.3	2.2	4.4	2.2	#N/A	5.4	5.4	1.8	3.5	1.8	#N/A	#N/A	#N/A	#N/A	#N/A	#N/A	#N/A	#N/A
2018-02-22 22:00:00	-4.5	-1.3	-3.9	-1.7	#N/A	5.7	5.7	2.2	4.4	2.2	#N/A	5.1	5.1	1.8	3.5	1.8	#N/A	#N/A	#N/A	#N/A	#N/A	#N/A	#N/A	#N/A
2018-02-22 23:00:00	-5	-1.3	-4.3	-1.7	#N/A	5.2	5.2	2.2	4.4	2.2	#N/A	4.4	4.4	1.8	3.5	1.8	#N/A	#N/A	#N/A	#N/A	#N/A	#N/A	#N/A	#N/A
2018-02-23	-5.3	0.6	-5	0.7	#N/A	4.2	4.2	2.2	4	2.2	#N/A	3.7	3.7	1.8	3.3	1.8	#N/A	#N/A	#N/A	#N/A	#N/A	#N/A	#N/A	#N/A
2018-02-23 01:00:00	-5.5	0.6	-5.1	0.7	#N/A	3.6	3.6	2.2	4	2.2	#N/A	3	3	1.8	3.3	1.8	#N/A	#N/A	#N/A	#N/A	#N/A	#N/A	#N/A	#N/A
2018-02-23 02:00:00	-5.9	0.6	-4.9	0.7	#N/A	3.4	3.4	2.2	4	2.2	#N/A	2.6	2.6	1.8	3.3	1.8	#N/A	#N/A	#N/A	#N/A	#N/A	#N/A	#N/A	#N/A
2018-02-23 03:00:00	-5.3	0.6	-4.2	0.7	#N/A	3.3	3.3	2.2	4	2.2	#N/A	2.4	2.4	1.8	3.3	1.8	#N/A	#N/A	#N/A	#N/A	#N/A	#N/A	#N/A	#N/A
2018-02-23 04:00:00	-5.1	0.6	-4.4	0.7	#N/A	3	3	2.2	4	2.2	#N/A	2.2	2.2	1.8	3.3	1.8	#N/A	#N/A	#N/A	#N/A	#N/A	#N/A	#N/A	#N/A
2018-02-23 05:00:00	-4.2	0.6	-3.8	0.7	#N/A	2.8	2.8	2.2	4	2.2	#N/A	2	2	1.8	3.3	1.8	#N/A	#N/A	#N/A	#N/A	#N/A	#N/A	#N/A	#N/A
2018-02-23 06:00:00	-4.1	0.6	-3.3	0.7	#N/A	2.7	2.7	2.2	4	2.2	#N/A	1.8	1.8	1.8	3.3	1.8	#N/A	#N/A	#N/A	#N/A	#N/A	#N/A	#N/A	#N/A
2018-02-23 07:00:00	-3.7	0.6	-3.3	0.7	#N/A	2.6	2.6	2.2	4	2.2	#N/A	1.7	1.7	1.8	3.3	1.8	#N/A	#N/A	#N/A	#N/A	#N/A	#N/A	#N/A	#N/A
2018-02-23 08:00:00	-1.2	0.6	-1.6	0.7	#N/A	2.5	2.5	2.2	4	2.2	#N/A	1.8	1.8	1.8	3.3	1.8	#N/A	#N/A	#N/A	#N/A	#N/A	#N/A	#N/A	#N/A
2018-02-23 09:00:00	3.2	0.6	0.5	0.7	#N/A	2.7	2.7	2.2	4	2.2	#N/A	2	2	1.8	3.3	1.8	#N/A	#N/A	#N/A	#N/A	#N/A	#N/A	#N/A	#N/A
2018-02-23 10:00:00	4.9	0.6	3.1	0.7	#N/A	2.7	2.7	2.2	4	2.2	#N/A	1.9	1.9	1.8	3.3	1.8	#N/A	#N/A	#N/A	#N/A	#N/A	#N/A	#N/A	#N/A
2018-02-23 11:00:00	6.4	0.6	6.3	0.7	#N/A	2.9	2.9	2.2	4	2.2	#N/A	2.1	2.1	1.8	3.3	1.8	#N/A	#N/A	#N/A	#N/A	#N/A	#N/A	#N/A	#N/A
2018-02-23 12:00:00	7.2	0.6	7	0.7	#N/A	2.9	2.9	2.2	4	2.2	#N/A	2.2	2.2	1.8	3.3	1.8	#N/A	#N/A	#N/A	#N/A	#N/A	#N/A	#N/A	#N/A
2018-02-23 13:00:00	7.1	0.6	6.9	0.7	#N/A	2.9	2.9	2.2	4	2.2	#N/A	2.2	2.2	1.8	3.3	1.8	#N/A	#N/A	#N/A	#N/A	#N/A	#N/A	#N/A	#N/A
2018-02-23 14:00:00	7.3	0.6	5.7	0.7	#N/A	3.6	3.6	2.2	4	2.2	#N/A	2.7	2.7	1.8	3.3	1.8	#N/A	#N/A	#N/A	#N/A	#N/A	#N/A	#N/A	#N/A
2018-02-23 15:00:00	8	0.6	7.2	0.7	#N/A	4.9	4.9	2.2	4	2.2	#N/A	3.4	3.4	1.8	3.3	1.8	#N/A	#N/A	#N/A	#N/A	#N/A	#N/A	#N/A	#N/A
2018-02-23 16:00:00	6.7	0.6	8.6	0.7	#N/A	5.4	5.4	2.2	4	2.2	#N/A	4.3	4.3	1.8	3.3	1.8	#N/A	#N/A	#N/A	#N/A	#N/A	#N/A	#N/A	#N/A
2018-02-23 17:00:00	4.5	0.6	3.7	0.7	#N/A	5.8	5.8	2.2	4	2.2	#N/A	5.5	5.5	1.8	3.3	1.8	#N/A	#N/A	#N/A	#N/A	#N/A	#N/A	#N/A	#N/A
2018-02-23 18:00:00	1.8	0.6	1.9	0.7	#N/A	6	6	2.2	4	2.2	#N/A	5.7	5.7	1.8	3.3	1.8	#N/A	#N/A	#N/A	#N/A	#N/A	#N/A	#N/A	#N/A
2018-02-23 19:00:00	0	0.6	0.9	0.7	#N/A	5.9	5.9	2.2	4	2.2	#N/A	5.6	5.6	1.8	3.3	1.8	#N/A	#N/A	#N/A	#N/A	#N/A	#N/A	#N/A	#N/A
2018-02-23 20:00:00	-0.8	0.6	0.2	0.7	#N/A	5.9	5.9	2.2	4	2.2	#N/A	5.2	5.2	1.8	3.3	1.8	#N/A	#N/A	#N/A	#N/A	#N/A	#N/A	#N/A	#N/A
2018-02-23 21:00:00	-0.5	0.6	0	0.7	#N/A	6.1	6.1	2.2	4	2.2	#N/A	5.7	5.7	1.8	3.3	1.8	#N/A	#N/A	#N/A	#N/A	#N/A	#N/A	#N/A	#N/A
2018-02-23 22:00:00	-0.2	0.6	-0.2	0.7	#N/A	5.7	5.7	2.2	4	2.2	#N/A	6.1	6.1	1.8	3.3	1.8	#N/A	#N/A	#N/A	#N/A	#N/A	#N/A	#N/A	#N/A
2018-02-23 23:00:00	-0.2	0.6	-0.1	0.7	#N/A	5	5	2.2	4	2.2	#N/A	4.3	4.3	1.8	3.3	1.8	#N/A	#N/A	#N/A	#N/A	#N/A	#N/A	#N/A	#N/A
2018-02-24	-0.1	3.1	0	3	#N/A	4.2	4.2	2.2	4.2	2.2	#N/A	3.7	3.7	1.8	3.7	1.8	#N/A	#N/A	#N/A	#N/A	#N/A	#N/A	#N/A	#N/A
2018-02-24 01:00:00	-0.2	3.1	-0.1	3	#N/A	3.6	3.6	2.2	4.2	2.2	#N/A	3.3	3.3	1.8	3.7	1.8	#N/A	#N/A	#N/A	#N/A	#N/A	#N/A	#N/A	#N/A
2018-02-24 02:00:00	-0.6	3.1	-0.7	3	#N/A	3.4	3.4	2.2	4.2	2.2	#N/A	3	3	1.8	3.7	1.8	#N/A	#N/A	#N/A	#N/A	#N/A	#N/A	#N/A	#N/A
2018-02-24 03:00:00	-0.6	3.1	-0.7	3	#N/A	3.4	3.4	2.2	4.2	2.2	#N/A	2.9	2.9	1.8	3.7	1.8	#N/A	#N/A	#N/A	#N/A	#N/A	#N/A	#N/A	#N/A
2018-02-24 04:00:00	-0.7	3.1	-0.5	3	#N/A	3.5	3.5	2.2	4.2	2.2	#N/A	2.8	2.8	1.8	3.7	1.8	#N/A	#N/A	#N/A	#N/A	#N/A	#N/A	#N/A	#N/A
2018-02-24 05:00:00	-0.5	3.1	-0.7	3	#N/A	3.4	3.4	2.2	4.2	2.2	#N/A	2.8	2.8	1.8	3.7	1.8	#N/A	#N/A	#N/A	#N/A	#N/A	#N/A	#N/A	#N/A
2018-02-24 06:00:00	-0.2	3.1	-0.3	3	#N/A	3.4	3.4	2.2	4.2	2.2	#N/A	2.8	2.8	1.8	3.7	1.8	#N/A	#N/A	#N/A	#N/A	#N/A	#N/A	#N/A	#N/A
2018-02-24 07:00:00	0.1	3.1	-0.3	3	#N/A	3.4	3.4	2.2	4.2	2.2	#N/A	2.7	2.7	1.8	3.7	1.8	#N/A	#N/A	#N/A	#N/A	#N/A	#N/A	#N/A	#N/A
2018-02-24 08:00:00	1.6	3.1	0.5	3	#N/A	3.2	3.2	2.2	4.2	2.2	#N/A	2.5	2.5	1.8	3.7	1.8	#N/A	#N/A	#N/A	#N/A	#N/A	#N/A	#N/A	#N/A
2018-02-24 09:00:00	3.3	3.1	1.3	3	#N/A	3.2	3.2	2.2	4.2	2.2	#N/A	2.5	2.5	1.8	3.7	1.8	#N/A	#N/A	#N/A	#N/A	#N/A	#N/A	#N/A	#N/A
2018-02-24 10:00:00	5.1	3.1	2.9	3	#N/A	3.2	3.2	2.2	4.2	2.2	#N/A	2.5	2.5	1.8	3.7	1.8	#N/A	#N/A	#N/A	#N/A	#N/A	#N/A	#N/A	#N/A
2018-02-24 11:00:00	7.1	3.1	6.2	3	#N/A	3.2	3.2	2.2	4.2	2.2	#N/A	2.5	2.5	1.8	3.7	1.8	#N/A	#N/A	#N/A	#N/A	#N/A	#N/A	#N/A	#N/A
2018-02-24 12:00:00	8.7	3.1	8.4	3	#N/A	3.3	3.3	2.2	4.2	2.2	#N/A	2.6	2.6	1.8	3.7	1.8	#N/A	#N/A	#N/A	#N/A	#N/A	#N/A	#N/A	#N/A
2018-02-24 13:00:00	9.2	3.1	10.2	3	#N/A	3.4	3.4	2.2	4.2	2.2	#N/A	2.6	2.6	1.8	3.7	1.8	#N/A	#N/A	#N/A	#N/A	#N/A	#N/A	#N/A	#N/A
2018-02-24 14:00:00	9.5	3.1	10.2	3	#N/A	3.9	3.9	2.2	4.2	2.2	#N/A	2.9	2.9	1.8	3.7	1.8	#N/A	#N/A	#N/A	#N/A	#N/A	#N/A	#N/A	#N/A
2018-02-24 15:00:00	7.6	3.1	9.2	3	#N/A	4.4	4.4	2.2	4.2	2.2	#N/A	3.3	3.3	1.8	3.7	1.8	#N/A	#N/A	#N/A	#N/A	#N/A	#N/A	#N/A	#N/A
2018-02-24 16:00:00	6.1	3.1	6	3	#N/A	5	5	2.2	4.2	2.2	#N/A	3.8	3.8	1.8	3.7	1.8	#N/A	#N/A	#N/A	#N/A	#N/A	#N/A	#N/A	#N/A
2018-02-24 17:00:00	5.2	3.1	4.9	3	#N/A	5.5	5.5	2.2	4.2	2.2	#N/A	5	5	1.8	3.7	1.8	#N/A	#N/A	#N/A	#N/A	#N/A	#N/A	#N/A	#N/A
2018-02-24 18:00:00	4.3	3.1	4.2	3	#N/A	6	6	2.2	4.2	2.2	#N/A	5.8	5.8	1.8	3.7	1.8	#N/A	#N/A	#N/A	#N/A	#N/A	#N/A	#N/A	#N/A
2018-02-24 19:00:00	3.7	3.1	3.7	3	#N/A	6.2	6.2	2.2	4.2	2.2	#N/A	6.5	6.5	1.8	3.7	1.8	#N/A	#N/A	#N/A	#N/A	#N/A	#N/A	#N/A	#N/A
2018-02-24 20:00:00	1.9	3.1	2.7	3	#N/A	6.2	6.2	2.2	4.2	2.2	#N/A	6.5	6.5	1.8	3.7	1.8	#N/A	#N/A	#N/A	#N/A	#N/A	#N/A	#N/A	#N/A
2018-02-24 21:00:00	1.7	3.1	1.9	3	#N/A	5.7	5.7	2.2	4.2	2.2	#N/A	6.1	6.1	1.8	3.7	1.8	#N/A	#N/A	#N/A	#N/A	#N/A	#N/A	#N/A	#N/A
2018-02-24 22:00:00	1.4	3.1	2.1	3	#N/A	5.2	5.2	2.2	4.2	2.2	#N/A	5	5	1.8	3.7	1.8	#N/A	#N/A	#N/A	#N/A	#N/A	#N/A	#N/A	#N/A
2018-02-24 23:00:00	0.8	3.1	1.7	3	#N/A	5	5	2.2	4.2	2.2	#N/A	4.6	4.6	1.8	3.7	1.8	#N/A	#N/A	#N/A	#N/A	#N/A	#N/A	#N/A	#N/A
2018-02-25	0	2.7	1.6	1.9	#N/A	4.7	4.7	2.2	4.3	2.2	#N/A	4.3	4.3	1.8	3.8	1.8	#N/A	#N/A	#N/A	#N/A	#N/A	#N/A	#N/A	#N/A
2018-02-25 01:00:00	0.4	2.7	1.3	1.9	#N/A	4.5	4.5	2.2	4.3	2.2	#N/A	4.2	4.2	1.8	3.8	1.8	#N/A	#N/A	#N/A	#N/A	#N/A	#N/A	#N/A	#N/A
2018-02-25 02:00:00	0.8	2.7	1.6	1.9	#N/A	4	4	2.2	4.3	2.2	#N/A	3.8	3.8	1.8	3.8	1.8	#N/A	#N/A	#N/A	#N/A	#N/A	#N/A	#N/A	#N/A
2018-02-25 03:00:00	0.8	2.7	1.7	1.9	#N/A	3.9	3.9	2.2	4.3	2.2	#N/A	3.5	3.5	1.8	3.8	1.8	#N/A	#N/A	#N/A	#N/A	#N/A	#N/A	#N/A	#N/A
2018-02-25 04:00:00	1.1	2.7	2	1.9	#N/A	3.9	3.9	2.2	4.3	2.2	#N/A	3.6	3.6	1.8	3.8	1.8	#N/A	#N/A	#N/A	#N/A	#N/A	#N/A	#N/A	#N/A
2018-02-25 05:00:00	1.3	2.7	2.1	1.9	#N/A	3.7	3.7	2.2	4.3	2.2	#N/A	3.5	3.5	1.8	3.8	1.8	#N/A	#N/A	#N/A	#N/A	#N/A	#N/A	#N/A	#N/A
2018-02-25 06:00:00	1	2.7	1.9	1.9	#N/A	3.5	3.5	2.2	4.3	2.2	#N/A	3.5	3.5	1.8	3.8	1.8	#N/A	#N/A	#N/A	#N/A	#N/A	#N/A	#N/A	#N/A
2018-02-25 07:00:00	1.4	2.7	1.9	1.9	#N/A	3.6	3.6	2.2	4.3	2.2	#N/A	3.4	3.4	1.8	3.8	1.8	#N/A	#N/A	#N/A	#N/A	#N/A	#N/A	#N/A	#N/A
2018-02-25 08:00:00	2.5	2.7	2.2	1.9	#N/A	3.8	3.8	2.2	4.3	2.2	#N/A	3.6	3.6	1.8	3.8	1.8	#N/A	#N/A	#N/A	#N/A	#N/A	#N/A	#N/A	#N/A
2018-02-25 09:00:00	3.6	2.7	2.4	1.9	#N/A	3.8	3.8	2.2	4.3	2.2	#N/A	3.6	3.6	1.8	3.8	1.8	#N/A	#N/A	#N/A	#N/A	#N/A	#N/A	#N/A	#N/A
2018-02-25 10:00:00	4.5	2.7	3	1.9	#N/A	3.8	3.8	2.2	4.3	2.2	#N/A	3.7	3.7	1.8	3.8	1.8	#N/A	#N/A	#N/A	#N/A	#N/A	#N/A	#N/A	#N/A
2018-02-25 11:00:00	5.4	2.7	3.7	1.9	#N/A	3.9	3.9	2.2	4.3	2.2	#N/A	3.8	3.8	1.8	3.8	1.8	#N/A	#N/A	#N/A	#N/A	#N/A	#N/A	#N/A	#N/A
2018-02-25 12:00:00	6.9	2.7	4.8	1.9	#N/A	3.8	3.8	2.2	4.3	2.2	#N/A	3.7	3.7	1.8	3.8	1.8	#N/A	#N/A	#N/A	#N/A	#N/A	#N/A	#N/A	#N/A
2018-02-25 13:00:00	5.9	2.7	4.1	1.9	#N/A	3.9	3.9	2.2	4.3	2.2	#N/A	3.6	3.6	1.8	3.8	1.8	#N/A	#N/A	#N/A	#N/A	#N/A	#N/A	#N/A	#N/A
2018-02-25 14:00:00	5.7	2.7	4	1.9	#N/A	4.2	4.2	2.2	4.3	2.2	#N/A	3.7	3.7	1.8	3.8	1.8	#N/A	#N/A	#N/A	#N/A	#N/A	#N/A	#N/A	#N/A
2018-02-25 15:00:00	5.3	2.7	3.6	1.9	#N/A	4.5	4.5	2.2	4.3	2.2	#N/A	3.7	3.7	1.8	3.8	1.8	#N/A	#N/A	#N/A	#N/A	#N/A	#N/A	#N/A	#N/A
2018-02-25 16:00:00	4.9	2.7	2.8	1.9	#N/A	4.7	4.7	2.2	4.3	2.2	#N/A	3.9	3.9	1.8	3.8	1.8	#N/A	#N/A	#N/A	#N/A	#N/A	#N/A	#N/A	#N/A
2018-02-25 17:00:00	4.3	2.7	2.3	1.9	#N/A	5	5	2.2	4.3	2.2	#N/A	4.1	4.1	1.8	3.8	1.8	#N/A	#N/A	#N/A	#N/A	#N/A	#N/A	#N/A	#N/A
2018-02-25 18:00:00	3.8	2.7	1.8	1.9	#N/A	5.4	5.4	2.2	4.3	2.2	#N/A	4.5	4.5	1.8	3.8	1.8	#N/A	#N/A	#N/A	#N/A	#N/A	#N/A	#N/A	#N/A
2018-02-25 19:00:00	2.5	2.7	0.8	1.9	#N/A	5.1	5.1	2.2	4.3	2.2	#N/A	4.3	4.3	1.8	3.8	1.8	#N/A	#N/A	#N/A	#N/A	#N/A	#N/A	#N/A	#N/A
2018-02-25 20:00:00	1.8	2.7	-0.1	1.9	#N/A	5	5	2.2	4.3	2.2	#N/A	4.2	4.2	1.8	3.8	1.8	#N/A	#N/A	#N/A	#N/A	#N/A	#N/A	#N/A	#N/A
2018-02-25 21:00:00	0.6	2.7	-0.8	1.9	#N/A	4.9	4.9	2.2	4.3	2.2	#N/A	4.1	4.1	1.8	3.8	1.8	#N/A	#N/A	#N/A	#N/A	#N/A	#N/A	#N/A	#N/A
2018-02-25 22:00:00	-0.1	2.7	-1.6	1.9	#N/A	4.8	4.8	2.2	4.3	2.2	#N/A	3.7	3.7	1.8	3.8	1.8	#N/A	#N/A	#N/A	#N/A	#N/A	#N/A	#N/A	#N/A
2018-02-25 23:00:00	-0.3	2.7	-2	1.9	#N/A	4.6	4.6	2.2	4.3	2.2	#N/A	3.6	3.6	1.8	3.8	1.8	#N/A	#N/A	#N/A	#N/A	#N/A	#N/A	#N/A	#N/A
2018-02-26	-0.7	-3.4	-2.5	-5	#N/A	4.4	4.4	2.2	2.6	2.2	#N/A	3.4	3.4	1.8	1.2	1.8	#N/A	#N/A	#N/A	#N/A	#N/A	#N/A	#N/A	#N/A
2018-02-26 01:00:00	-1.2	-3.4	-3.4	-5	#N/A	4.1	4.1	2.2	2.6	2.2	#N/A	3	3	1.8	1.2	1.8	#N/A	#N/A	#N/A	#N/A	#N/A	#N/A	#N/A	#N/A
2018-02-26 02:00:00	-2.1	-3.4	-4.4	-5	#N/A	3.9	3.9	2.2	2.6	2.2	#N/A	2.7	2.7	1.8	1.2	1.8	#N/A	#N/A	#N/A	#N/A	#N/A	#N/A	#N/A	#N/A
2018-02-26 03:00:00	-2.8	-3.4	-5.7	-5	#N/A	3.5	3.5	2.2	2.6	2.2	#N/A	2.4	2.4	1.8	1.2	1.8	#N/A	#N/A	#N/A	#N/A	#N/A	#N/A	#N/A	#N/A
2018-02-26 04:00:00	-4	-3.4	-7.3	-5	#N/A	3.3	3.3	2.2	2.6	2.2	#N/A	2.1	2.1	1.8	1.2	1.8	#N/A	#N/A	#N/A	#N/A	#N/A	#N/A	#N/A	#N/A
2018-02-26 05:00:00	-5.4	-3.4	-7.9	-5	#N/A	3.2	3.2	2.2	2.6	2.2	#N/A	1.9	1.9	1.8	1.2	1.8	#N/A	#N/A	#N/A	#N/A	#N/A	#N/A	#N/A	#N/A
2018-02-26 06:00:00	-6.4	-3.4	-8.7	-5	#N/A	3	3	2.2	2.6	2.2	#N/A	1.7	1.7	1.8	1.2	1.8	#N/A	#N/A	#N/A	#N/A	#N/A	#N/A	#N/A	#N/A
2018-02-26 07:00:00	-6.9	-3.4	-9.3	-5	#N/A	2.9	2.9	2.2	2.6	2.2	#N/A	1.3	1.3	1.8	1.2	1.8	#N/A	#N/A	#N/A	#N/A	#N/A	#N/A	#N/A	#N/A
2018-02-26 08:00:00	-4.4	-3.4	-8.8	-5	#N/A	2.6	2.6	2.2	2.6	2.2	#N/A	0.9	0.9	1.8	1.2	1.8	#N/A	#N/A	#N/A	#N/A	#N/A	#N/A	#N/A	#N/A
2018-02-26 09:00:00	-2.7	-3.4	-7.5	-5	#N/A	2.3	2.3	2.2	2.6	2.2	#N/A	0.4	0.4	1.8	1.2	1.8	#N/A	#N/A	#N/A	#N/A	#N/A	#N/A	#N/A	#N/A
2018-02-26 10:00:00	-1.7	-3.4	-3.7	-5	#N/A	1.9	1.9	2.2	2.6	2.2	#N/A	-0.2	-0.2	1.8	1.2	1.8	#N/A	#N/A	#N/A	#N/A	#N/A	#N/A	#N/A	#N/A
2018-02-26 11:00:00	-1.9	-3.4	-2	-5	#N/A	1.4	1.4	2.2	2.6	2.2	#N/A	-0.5	-0.5	1.8	1.2	1.8	#N/A	#N/A	#N/A	#N/A	#N/A	#N/A	#N/A	#N/A
2018-02-26 12:00:00	-0.1	-3.4	-0.8	-5	#N/A	1.1	1.1	2.2	2.6	2.2	#N/A	-0.8	-0.8	1.8	1.2	1.8	#N/A	#N/A	#N/A	#N/A	#N/A	#N/A	#N/A	#N/A
2018-02-26 13:00:00	0.7	-3.4	1	-5	#N/A	0.9	0.9	2.2	2.6	2.2	#N/A	-1	-1	1.8	1.2	1.8	#N/A	#N/A	#N/A	#N/A	#N/A	#N/A	#N/A	#N/A
2018-02-26 14:00:00	0.8	-3.4	0.3	-5	#N/A	1.6	1.6	2.2	2.6	2.2	#N/A	-0.9	-0.9	1.8	1.2	1.8	#N/A	#N/A	#N/A	#N/A	#N/A	#N/A	#N/A	#N/A
2018-02-26 15:00:00	-1	-3.4	1.7	-5	#N/A	2.1	2.1	2.2	2.6	2.2	#N/A	-0.4	-0.4	1.8	1.2	1.8	#N/A	#N/A	#N/A	#N/A	#N/A	#N/A	#N/A	#N/A
2018-02-26 16:00:00	-1.4	-3.4	-1.5	-5	#N/A	2.3	2.3	2.2	2.6	2.2	#N/A	0.9	0.9	1.8	1.2	1.8	#N/A	#N/A	#N/A	#N/A	#N/A	#N/A	#N/A	#N/A
2018-02-26 17:00:00	-2.5	-3.4	-3.9	-5	#N/A	2.2	2.2	2.2	2.6	2.2	#N/A	1.5	1.5	1.8	1.2	1.8	#N/A	#N/A	#N/A	#N/A	#N/A	#N/A	#N/A	#N/A
2018-02-26 18:00:00	-5	-3.4	-5.3	-5	#N/A	2.7	2.7	2.2	2.6	2.2	#N/A	1.9	1.9	1.8	1.2	1.8	#N/A	#N/A	#N/A	#N/A	#N/A	#N/A	#N/A	#N/A
2018-02-26 19:00:00	-5.3	-3.4	-6.8	-5	#N/A	2.9	2.9	2.2	2.6	2.2	#N/A	2.5	2.5	1.8	1.2	1.8	#N/A	#N/A	#N/A	#N/A	#N/A	#N/A	#N/A	#N/A
2018-02-26 20:00:00	-6.5	-3.4	-7.5	-5	#N/A	2.9	2.9	2.2	2.6	2.2	#N/A	2.2	2.2	1.8	1.2	1.8	#N/A	#N/A	#N/A	#N/A	#N/A	#N/A	#N/A	#N/A
2018-02-26 21:00:00	-6.7	-3.4	-8.3	-5	#N/A	2.3	2.3	2.2	2.6	2.2	#N/A	2.7	2.7	1.8	1.2	1.8	#N/A	#N/A	#N/A	#N/A	#N/A	#N/A	#N/A	#N/A
2018-02-26 22:00:00	-6.6	-3.4	-8.7	-5	#N/A	2.2	2.2	2.2	2.6	2.2	#N/A	1.5	1.5	1.8	1.2	1.8	#N/A	#N/A	#N/A	#N/A	#N/A	#N/A	#N/A	#N/A
2018-02-26 23:00:00	-6.8	-3.4	-8.9	-5	#N/A	1.8	1.8	2.2	2.6	2.2	#N/A	0.6	0.6	1.8	1.2	1.8	#N/A	#N/A	#N/A	#N/A	#N/A	#N/A	#N/A	#N/A
2018-02-27	-7	-6.6	-9.6	-8	#N/A	1.1	1.1	2.2	0.3	2.2	#N/A	0	0	1.8	-1.2	1.8	#N/A	#N/A	#N/A	#N/A	#N/A	#N/A	#N/A	#N/A
2018-02-27 01:00:00	-7.3	-6.6	-9.3	-8	#N/A	1	1	2.2	0.3	2.2	#N/A	-0.5	-0.5	1.8	-1.2	1.8	#N/A	#N/A	#N/A	#N/A	#N/A	#N/A	#N/A	#N/A
2018-02-27 02:00:00	-7.5	-6.6	-9.3	-8	#N/A	0.6	0.6	2.2	0.3	2.2	#N/A	-0.8	-0.8	1.8	-1.2	1.8	#N/A	#N/A	#N/A	#N/A	#N/A	#N/A	#N/A	#N/A
2018-02-27 03:00:00	-7.6	-6.6	-9.6	-8	#N/A	0.5	0.5	2.2	0.3	2.2	#N/A	-1.1	-1.1	1.8	-1.2	1.8	#N/A	#N/A	#N/A	#N/A	#N/A	#N/A	#N/A	#N/A
2018-02-27 04:00:00	-7.9	-6.6	-9.9	-8	#N/A	0.5	0.5	2.2	0.3	2.2	#N/A	-1.3	-1.3	1.8	-1.2	1.8	#N/A	#N/A	#N/A	#N/A	#N/A	#N/A	#N/A	#N/A
2018-02-27 05:00:00	-7.7	-6.6	-9.9	-8	#N/A	0.4	0.4	2.2	0.3	2.2	#N/A	-1.4	-1.4	1.8	-1.2	1.8	#N/A	#N/A	#N/A	#N/A	#N/A	#N/A	#N/A	#N/A
2018-02-27 06:00:00	-7.7	-6.6	-9.8	-8	#N/A	0.3	0.3	2.2	0.3	2.2	#N/A	-1.7	-1.7	1.8	-1.2	1.8	#N/A	#N/A	#N/A	#N/A	#N/A	#N/A	#N/A	#N/A
2018-02-27 07:00:00	-7.8	-6.6	-9.7	-8	#N/A	0.2	0.2	2.2	0.3	2.2	#N/A	-1.6	-1.6	1.8	-1.2	1.8	#N/A	#N/A	#N/A	#N/A	#N/A	#N/A	#N/A	#N/A
2018-02-27 08:00:00	-7	-6.6	-9	-8	#N/A	0.2	0.2	2.2	0.3	2.2	#N/A	-1.6	-1.6	1.8	-1.2	1.8	#N/A	#N/A	#N/A	#N/A	#N/A	#N/A	#N/A	#N/A
2018-02-27 09:00:00	-6.2	-6.6	-7.6	-8	#N/A	0.1	0.1	2.2	0.3	2.2	#N/A	-1.8	-1.8	1.8	-1.2	1.8	#N/A	#N/A	#N/A	#N/A	#N/A	#N/A	#N/A	#N/A
2018-02-27 10:00:00	-5.4	-6.6	-6.4	-8	#N/A	-0.1	-0.1	2.2	0.3	2.2	#N/A	-1.9	-1.9	1.8	-1.2	1.8	#N/A	#N/A	#N/A	#N/A	#N/A	#N/A	#N/A	#N/A
2018-02-27 11:00:00	-4.4	-6.6	-5.8	-8	#N/A	-0.1	-0.1	2.2	0.3	2.2	#N/A	-1.9	-1.9	1.8	-1.2	1.8	#N/A	#N/A	#N/A	#N/A	#N/A	#N/A	#N/A	#N/A
2018-02-27 12:00:00	-4.2	-6.6	-5	-8	#N/A	-0.2	-0.2	2.2	0.3	2.2	#N/A	-2	-2	1.8	-1.2	1.8	#N/A	#N/A	#N/A	#N/A	#N/A	#N/A	#N/A	#N/A
2018-02-27 13:00:00	-4.8	-6.6	-5	-8	#N/A	-0.2	-0.2	2.2	0.3	2.2	#N/A	-2	-2	1.8	-1.2	1.8	#N/A	#N/A	#N/A	#N/A	#N/A	#N/A	#N/A	#N/A
2018-02-27 14:00:00	-4.4	-6.6	-6	-8	#N/A	-0.1	-0.1	2.2	0.3	2.2	#N/A	-1.8	-1.8	1.8	-1.2	1.8	#N/A	#N/A	#N/A	#N/A	#N/A	#N/A	#N/A	#N/A
2018-02-27 15:00:00	-3.5	-6.6	-5.2	-8	#N/A	0.1	0.1	2.2	0.3	2.2	#N/A	-1.4	-1.4	1.8	-1.2	1.8	#N/A	#N/A	#N/A	#N/A	#N/A	#N/A	#N/A	#N/A
2018-02-27 16:00:00	-4.3	-6.6	-3.3	-8	#N/A	0.2	0.2	2.2	0.3	2.2	#N/A	-1	-1	1.8	-1.2	1.8	#N/A	#N/A	#N/A	#N/A	#N/A	#N/A	#N/A	#N/A
2018-02-27 17:00:00	-5.6	-6.6	-5.6	-8	#N/A	0.5	0.5	2.2	0.3	2.2	#N/A	-0.8	-0.8	1.8	-1.2	1.8	#N/A	#N/A	#N/A	#N/A	#N/A	#N/A	#N/A	#N/A
2018-02-27 18:00:00	-6.7	-6.6	-7.6	-8	#N/A	0.5	0.5	2.2	0.3	2.2	#N/A	-0.6	-0.6	1.8	-1.2	1.8	#N/A	#N/A	#N/A	#N/A	#N/A	#N/A	#N/A	#N/A
2018-02-27 19:00:00	-8.2	-6.6	-9	-8	#N/A	0.2	0.2	2.2	0.3	2.2	#N/A	-0.7	-0.7	1.8	-1.2	1.8	#N/A	#N/A	#N/A	#N/A	#N/A	#N/A	#N/A	#N/A
2018-02-27 20:00:00	-9.5	-6.6	-10.6	-8	#N/A	0.3	0.3	2.2	0.3	2.2	#N/A	-1.1	-1.1	1.8	-1.2	1.8	#N/A	#N/A	#N/A	#N/A	#N/A	#N/A	#N/A	#N/A
2018-02-27 21:00:00	-8.5	-6.6	-10.2	-8	#N/A	0.6	0.6	2.2	0.3	2.2	#N/A	-0.8	-0.8	1.8	-1.2	1.8	#N/A	#N/A	#N/A	#N/A	#N/A	#N/A	#N/A	#N/A
2018-02-27 22:00:00	-6.9	-6.6	-8.5	-8	#N/A	0.3	0.3	2.2	0.3	2.2	#N/A	-0.1	-0.1	1.8	-1.2	1.8	#N/A	#N/A	#N/A	#N/A	#N/A	#N/A	#N/A	#N/A
2018-02-27 23:00:00	-8.5	-6.6	-9.6	-8	#N/A	-0.1	-0.1	2.2	0.3	2.2	#N/A	-1	-1	1.8	-1.2	1.8	#N/A	#N/A	#N/A	#N/A	#N/A	#N/A	#N/A	#N/A
2018-02-28	-9.7	-4.2	-11.5	-5.6	#N/A	-0.5	-0.5	2.2	-0.6	2.2	#N/A	-1.8	-1.8	1.8	-2	1.8	#N/A	#N/A	#N/A	#N/A	#N/A	#N/A	#N/A	#N/A
2018-02-28 01:00:00	-9.2	-4.2	-10.3	-5.6	#N/A	-1	-1	2.2	-0.6	2.2	#N/A	-2.3	-2.3	1.8	-2	1.8	#N/A	#N/A	#N/A	#N/A	#N/A	#N/A	#N/A	#N/A
2018-02-28 02:00:00	-8.8	-4.2	-9.8	-5.6	#N/A	-1.4	-1.4	2.2	-0.6	2.2	#N/A	-2.9	-2.9	1.8	-2	1.8	#N/A	#N/A	#N/A	#N/A	#N/A	#N/A	#N/A	#N/A
2018-02-28 03:00:00	-8.4	-4.2	-9.6	-5.6	#N/A	-1.1	-1.1	2.2	-0.6	2.2	#N/A	-2.8	-2.8	1.8	-2	1.8	#N/A	#N/A	#N/A	#N/A	#N/A	#N/A	#N/A	#N/A
2018-02-28 04:00:00	-10.2	-4.2	-11.2	-5.6	#N/A	-0.7	-0.7	2.2	-0.6	2.2	#N/A	-2.2	-2.2	1.8	-2	1.8	#N/A	#N/A	#N/A	#N/A	#N/A	#N/A	#N/A	#N/A
2018-02-28 05:00:00	-9.5	-4.2	-11.3	-5.6	#N/A	-1.2	-1.2	2.2	-0.6	2.2	#N/A	-2.7	-2.7	1.8	-2	1.8	#N/A	#N/A	#N/A	#N/A	#N/A	#N/A	#N/A	#N/A
2018-02-28 06:00:00	-9.3	-4.2	-10.8	-5.6	#N/A	-1.6	-1.6	2.2	-0.6	2.2	#N/A	-3.4	-3.4	1.8	-2	1.8	#N/A	#N/A	#N/A	#N/A	#N/A	#N/A	#N/A	#N/A
2018-02-28 07:00:00	-7.7	-4.2	-9.2	-5.6	#N/A	-1.5	-1.5	2.2	-0.6	2.2	#N/A	-3	-3	1.8	-2	1.8	#N/A	#N/A	#N/A	#N/A	#N/A	#N/A	#N/A	#N/A
2018-02-28 08:00:00	-4.4	-4.2	-7.2	-5.6	#N/A	-1.4	-1.4	2.2	-0.6	2.2	#N/A	-2.8	-2.8	1.8	-2	1.8	#N/A	#N/A	#N/A	#N/A	#N/A	#N/A	#N/A	#N/A
2018-02-28 09:00:00	-2.2	-4.2	-4.7	-5.6	#N/A	-1.3	-1.3	2.2	-0.6	2.2	#N/A	-2.7	-2.7	1.8	-2	1.8	#N/A	#N/A	#N/A	#N/A	#N/A	#N/A	#N/A	#N/A
2018-02-28 10:00:00	-1.3	-4.2	-3	-5.6	#N/A	-1.9	-1.9	2.2	-0.6	2.2	#N/A	-3.3	-3.3	1.8	-2	1.8	#N/A	#N/A	#N/A	#N/A	#N/A	#N/A	#N/A	#N/A
2018-02-28 11:00:00	-1.9	-4.2	-2.4	-5.6	#N/A	-1.7	-1.7	2.2	-0.6	2.2	#N/A	-3.4	-3.4	1.8	-2	1.8	#N/A	#N/A	#N/A	#N/A	#N/A	#N/A	#N/A	#N/A
2018-02-28 12:00:00	-1.2	-4.2	-2.7	-5.6	#N/A	-1.7	-1.7	2.2	-0.6	2.2	#N/A	-3.3	-3.3	1.8	-2	1.8	#N/A	#N/A	#N/A	#N/A	#N/A	#N/A	#N/A	#N/A
2018-02-28 13:00:00	-1.1	-4.2	-2.7	-5.6	#N/A	-1.3	-1.3	2.2	-0.6	2.2	#N/A	-2.8	-2.8	1.8	-2	1.8	#N/A	#N/A	#N/A	#N/A	#N/A	#N/A	#N/A	#N/A
2018-02-28 14:00:00	-1.8	-4.2	-2.9	-5.6	#N/A	-0.3	-0.3	2.2	-0.6	2.2	#N/A	-2.1	-2.1	1.8	-2	1.8	#N/A	#N/A	#N/A	#N/A	#N/A	#N/A	#N/A	#N/A
2018-02-28 15:00:00	-1.8	-4.2	-2.9	-5.6	#N/A	0.3	0.3	2.2	-0.6	2.2	#N/A	-1.2	-1.2	1.8	-2	1.8	#N/A	#N/A	#N/A	#N/A	#N/A	#N/A	#N/A	#N/A
2018-02-28 16:00:00	-1.8	-4.2	-3	-5.6	#N/A	0.5	0.5	2.2	-0.6	2.2	#N/A	-0.7	-0.7	1.8	-2	1.8	#N/A	#N/A	#N/A	#N/A	#N/A	#N/A	#N/A	#N/A
2018-02-28 17:00:00	-1.6	-4.2	-3.1	-5.6	#N/A	0.3	0.3	2.2	-0.6	2.2	#N/A	-0.5	-0.5	1.8	-2	1.8	#N/A	#N/A	#N/A	#N/A	#N/A	#N/A	#N/A	#N/A
2018-02-28 18:00:00	-1.3	-4.2	-3.2	-5.6	#N/A	0.5	0.5	2.2	-0.6	2.2	#N/A	-0.6	-0.6	1.8	-2	1.8	#N/A	#N/A	#N/A	#N/A	#N/A	#N/A	#N/A	#N/A
2018-02-28 19:00:00	-1.8	-4.2	-3.1	-5.6	#N/A	0.5	0.5	2.2	-0.6	2.2	#N/A	-0.6	-0.6	1.8	-2	1.8	#N/A	#N/A	#N/A	#N/A	#N/A	#N/A	#N/A	#N/A
2018-02-28 20:00:00	-1.7	-4.2	-3.1	-5.6	#N/A	0.3	0.3	2.2	-0.6	2.2	#N/A	-0.7	-0.7	1.8	-2	1.8	#N/A	#N/A	#N/A	#N/A	#N/A	#N/A	#N/A	#N/A
2018-02-28 21:00:00	-1.8	-4.2	-2.9	-5.6	#N/A	0.3	0.3	2.2	-0.6	2.2	#N/A	-0.7	-0.7	1.8	-2	1.8	#N/A	#N/A	#N/A	#N/A	#N/A	#N/A	#N/A	#N/A
2018-02-28 22:00:00	-1.5	-4.2	-2.4	-5.6	#N/A	0.3	0.3	2.2	-0.6	2.2	#N/A	-0.7	-0.7	1.8	-2	1.8	#N/A	#N/A	#N/A	#N/A	#N/A	#N/A	#N/A	#N/A
2018-02-28 23:00:00	-0.8	-4.2	-1.9	-5.6	#N/A	0.4	0.4	2.2	-0.6	2.2	#N/A	-0.7	-0.7	1.8	-2	1.8	#N/A	#N/A	#N/A	#N/A	#N/A	#N/A	#N/A	#N/A
2018-03-01	-0.5	1.4	-1.6	1.1	#N/A	0.6	0.6	2.2	1.3	2.2	#N/A	-0.8	-0.8	1.8	0.5	1.8	#N/A	#N/A	#N/A	#N/A	#N/A	#N/A	#N/A	#N/A
2018-03-01 01:00:00	0	1.4	-1.4	1.1	#N/A	0.4	0.4	2.2	1.3	2.2	#N/A	-0.7	-0.7	1.8	0.5	1.8	#N/A	#N/A	#N/A	#N/A	#N/A	#N/A	#N/A	#N/A
2018-03-01 02:00:00	0	1.4	-1.2	1.1	#N/A	0.5	0.5	2.2	1.3	2.2	#N/A	-0.7	-0.7	1.8	0.5	1.8	#N/A	#N/A	#N/A	#N/A	#N/A	#N/A	#N/A	#N/A
2018-03-01 03:00:00	0.1	1.4	-0.9	1.1	#N/A	0.5	0.5	2.2	1.3	2.2	#N/A	-0.6	-0.6	1.8	0.5	1.8	#N/A	#N/A	#N/A	#N/A	#N/A	#N/A	#N/A	#N/A
2018-03-01 04:00:00	0.2	1.4	-0.7	1.1	#N/A	0.6	0.6	2.2	1.3	2.2	#N/A	-0.4	-0.4	1.8	0.5	1.8	#N/A	#N/A	#N/A	#N/A	#N/A	#N/A	#N/A	#N/A
2018-03-01 05:00:00	0.1	1.4	-0.5	1.1	#N/A	0.9	0.9	2.2	1.3	2.2	#N/A	-0.2	-0.2	1.8	0.5	1.8	#N/A	#N/A	#N/A	#N/A	#N/A	#N/A	#N/A	#N/A
2018-03-01 06:00:00	0.3	1.4	-0.2	1.1	#N/A	1	1	2.2	1.3	2.2	#N/A	-0.1	-0.1	1.8	0.5	1.8	#N/A	#N/A	#N/A	#N/A	#N/A	#N/A	#N/A	#N/A
2018-03-01 07:00:00	0.4	1.4	-0.2	1.1	#N/A	1.2	1.2	2.2	1.3	2.2	#N/A	0	0	1.8	0.5	1.8	#N/A	#N/A	#N/A	#N/A	#N/A	#N/A	#N/A	#N/A
2018-03-01 08:00:00	0.4	1.4	0.2	1.1	#N/A	1.2	1.2	2.2	1.3	2.2	#N/A	0.1	0.1	1.8	0.5	1.8	#N/A	#N/A	#N/A	#N/A	#N/A	#N/A	#N/A	#N/A
2018-03-01 09:00:00	0.8	1.4	0.7	1.1	#N/A	1.2	1.2	2.2	1.3	2.2	#N/A	0.2	0.2	1.8	0.5	1.8	#N/A	#N/A	#N/A	#N/A	#N/A	#N/A	#N/A	#N/A
2018-03-01 10:00:00	1.2	1.4	1.4	1.1	#N/A	1.2	1.2	2.2	1.3	2.2	#N/A	0.3	0.3	1.8	0.5	1.8	#N/A	#N/A	#N/A	#N/A	#N/A	#N/A	#N/A	#N/A
2018-03-01 11:00:00	1.5	1.4	1.5	1.1	#N/A	1.2	1.2	2.2	1.3	2.2	#N/A	0.4	0.4	1.8	0.5	1.8	#N/A	#N/A	#N/A	#N/A	#N/A	#N/A	#N/A	#N/A
2018-03-01 12:00:00	1.9	1.4	1.3	1.1	#N/A	1.2	1.2	2.2	1.3	2.2	#N/A	0.5	0.5	1.8	0.5	1.8	#N/A	#N/A	#N/A	#N/A	#N/A	#N/A	#N/A	#N/A
2018-03-01 13:00:00	2.5	1.4	2.1	1.1	#N/A	1.2	1.2	2.2	1.3	2.2	#N/A	0.5	0.5	1.8	0.5	1.8	#N/A	#N/A	#N/A	#N/A	#N/A	#N/A	#N/A	#N/A
2018-03-01 14:00:00	2.7	1.4	3.3	1.1	#N/A	1.2	1.2	2.2	1.3	2.2	#N/A	0.6	0.6	1.8	0.5	1.8	#N/A	#N/A	#N/A	#N/A	#N/A	#N/A	#N/A	#N/A
2018-03-01 15:00:00	2.9	1.4	3	1.1	#N/A	1.4	1.4	2.2	1.3	2.2	#N/A	0.8	0.8	1.8	0.5	1.8	#N/A	#N/A	#N/A	#N/A	#N/A	#N/A	#N/A	#N/A
2018-03-01 16:00:00	3	1.4	2.9	1.1	#N/A	1.5	1.5	2.2	1.3	2.2	#N/A	1	1	1.8	0.5	1.8	#N/A	#N/A	#N/A	#N/A	#N/A	#N/A	#N/A	#N/A
2018-03-01 17:00:00	2.3	1.4	2.2	1.1	#N/A	1.5	1.5	2.2	1.3	2.2	#N/A	1.1	1.1	1.8	0.5	1.8	#N/A	#N/A	#N/A	#N/A	#N/A	#N/A	#N/A	#N/A
2018-03-01 18:00:00	1.8	1.4	1.6	1.1	#N/A	1.7	1.7	2.2	1.3	2.2	#N/A	1	1	1.8	0.5	1.8	#N/A	#N/A	#N/A	#N/A	#N/A	#N/A	#N/A	#N/A
2018-03-01 19:00:00	2.1	1.4	1.7	1.1	#N/A	1.9	1.9	2.2	1.3	2.2	#N/A	1.3	1.3	1.8	0.5	1.8	#N/A	#N/A	#N/A	#N/A	#N/A	#N/A	#N/A	#N/A
2018-03-01 20:00:00	2.2	1.4	2.1	1.1	#N/A	2	2	2.2	1.3	2.2	#N/A	1.8	1.8	1.8	0.5	1.8	#N/A	#N/A	#N/A	#N/A	#N/A	#N/A	#N/A	#N/A
2018-03-01 21:00:00	2.1	1.4	2.5	1.1	#N/A	2.1	2.1	2.2	1.3	2.2	#N/A	1.7	1.7	1.8	0.5	1.8	#N/A	#N/A	#N/A	#N/A	#N/A	#N/A	#N/A	#N/A
2018-03-01 22:00:00	2.7	1.4	3	1.1	#N/A	2.1	2.1	2.2	1.3	2.2	#N/A	1.7	1.7	1.8	0.5	1.8	#N/A	#N/A	#N/A	#N/A	#N/A	#N/A	#N/A	#N/A
2018-03-01 23:00:00	3	1.4	2.6	1.1	#N/A	2	2	2.2	1.3	2.2	#N/A	1.5	1.5	1.8	0.5	1.8	#N/A	#N/A	#N/A	#N/A	#N/A	#N/A	#N/A	#N/A
2018-03-02	3.3	3.1	2.5	1.8	#N/A	1.9	1.9	2.2	2.8	2.2	#N/A	1.3	1.3	1.8	1.9	1.8	#N/A	#N/A	#N/A	#N/A	#N/A	#N/A	#N/A	#N/A
2018-03-02 01:00:00	3.4	3.1	3.3	1.8	#N/A	2	2	2.2	2.8	2.2	#N/A	1.4	1.4	1.8	1.9	1.8	#N/A	#N/A	#N/A	#N/A	#N/A	#N/A	#N/A	#N/A
2018-03-02 02:00:00	4.9	3.1	2.8	1.8	#N/A	2.1	2.1	2.2	2.8	2.2	#N/A	1.6	1.6	1.8	1.9	1.8	#N/A	#N/A	#N/A	#N/A	#N/A	#N/A	#N/A	#N/A
2018-03-02 03:00:00	4.5	3.1	2.5	1.8	#N/A	2.2	2.2	2.2	2.8	2.2	#N/A	1.8	1.8	1.8	1.9	1.8	#N/A	#N/A	#N/A	#N/A	#N/A	#N/A	#N/A	#N/A
2018-03-02 04:00:00	3.8	3.1	2.6	1.8	#N/A	2.4	2.4	2.2	2.8	2.2	#N/A	2	2	1.8	1.9	1.8	#N/A	#N/A	#N/A	#N/A	#N/A	#N/A	#N/A	#N/A
2018-03-02 05:00:00	4.5	3.1	2.6	1.8	#N/A	2.5	2.5	2.2	2.8	2.2	#N/A	1.9	1.9	1.8	1.9	1.8	#N/A	#N/A	#N/A	#N/A	#N/A	#N/A	#N/A	#N/A
2018-03-02 06:00:00	3.8	3.1	2	1.8	#N/A	2.7	2.7	2.2	2.8	2.2	#N/A	1.8	1.8	1.8	1.9	1.8	#N/A	#N/A	#N/A	#N/A	#N/A	#N/A	#N/A	#N/A
2018-03-02 07:00:00	4.8	3.1	1.8	1.8	#N/A	2.8	2.8	2.2	2.8	2.2	#N/A	2.2	2.2	1.8	1.9	1.8	#N/A	#N/A	#N/A	#N/A	#N/A	#N/A	#N/A	#N/A
2018-03-02 08:00:00	4.3	3.1	2.3	1.8	#N/A	3.2	3.2	2.2	2.8	2.2	#N/A	2	2	1.8	1.9	1.8	#N/A	#N/A	#N/A	#N/A	#N/A	#N/A	#N/A	#N/A
2018-03-02 09:00:00	2.7	3.1	2	1.8	#N/A	3.1	3.1	2.2	2.8	2.2	#N/A	1.9	1.9	1.8	1.9	1.8	#N/A	#N/A	#N/A	#N/A	#N/A	#N/A	#N/A	#N/A
2018-03-02 10:00:00	1.5	3.1	0.3	1.8	#N/A	2.9	2.9	2.2	2.8	2.2	#N/A	1.9	1.9	1.8	1.9	1.8	#N/A	#N/A	#N/A	#N/A	#N/A	#N/A	#N/A	#N/A
2018-03-02 11:00:00	2.2	3.1	0.6	1.8	#N/A	3.1	3.1	2.2	2.8	2.2	#N/A	1.9	1.9	1.8	1.9	1.8	#N/A	#N/A	#N/A	#N/A	#N/A	#N/A	#N/A	#N/A
2018-03-02 12:00:00	2.6	3.1	0.9	1.8	#N/A	2.8	2.8	2.2	2.8	2.2	#N/A	1.7	1.7	1.8	1.9	1.8	#N/A	#N/A	#N/A	#N/A	#N/A	#N/A	#N/A	#N/A
2018-03-02 13:00:00	3.9	3.1	2.2	1.8	#N/A	3.1	3.1	2.2	2.8	2.2	#N/A	1.6	1.6	1.8	1.9	1.8	#N/A	#N/A	#N/A	#N/A	#N/A	#N/A	#N/A	#N/A
2018-03-02 14:00:00	7.2	3.1	4.5	1.8	#N/A	2.9	2.9	2.2	2.8	2.2	#N/A	1.7	1.7	1.8	1.9	1.8	#N/A	#N/A	#N/A	#N/A	#N/A	#N/A	#N/A	#N/A
2018-03-02 15:00:00	7.5	3.1	7.1	1.8	#N/A	2.5	2.5	2.2	2.8	2.2	#N/A	1.6	1.6	1.8	1.9	1.8	#N/A	#N/A	#N/A	#N/A	#N/A	#N/A	#N/A	#N/A
2018-03-02 16:00:00	7.9	3.1	6.9	1.8	#N/A	2.1	2.1	2.2	2.8	2.2	#N/A	1	1	1.8	1.9	1.8	#N/A	#N/A	#N/A	#N/A	#N/A	#N/A	#N/A	#N/A
2018-03-02 17:00:00	6.1	3.1	4.5	1.8	#N/A	2.3	2.3	2.2	2.8	2.2	#N/A	1.1	1.1	1.8	1.9	1.8	#N/A	#N/A	#N/A	#N/A	#N/A	#N/A	#N/A	#N/A
2018-03-02 18:00:00	2.3	3.1	1.6	1.8	#N/A	2.5	2.5	2.2	2.8	2.2	#N/A	1.2	1.2	1.8	1.9	1.8	#N/A	#N/A	#N/A	#N/A	#N/A	#N/A	#N/A	#N/A
2018-03-02 19:00:00	-0.2	3.1	0.2	1.8	#N/A	2.9	2.9	2.2	2.8	2.2	#N/A	1.7	1.7	1.8	1.9	1.8	#N/A	#N/A	#N/A	#N/A	#N/A	#N/A	#N/A	#N/A
2018-03-02 20:00:00	-1.5	3.1	-1	1.8	#N/A	3.8	3.8	2.2	2.8	2.2	#N/A	2.5	2.5	1.8	1.9	1.8	#N/A	#N/A	#N/A	#N/A	#N/A	#N/A	#N/A	#N/A
2018-03-02 21:00:00	-1.5	3.1	-2.1	1.8	#N/A	3.9	3.9	2.2	2.8	2.2	#N/A	3.4	3.4	1.8	1.9	1.8	#N/A	#N/A	#N/A	#N/A	#N/A	#N/A	#N/A	#N/A
2018-03-02 22:00:00	-2.3	3.1	-2.8	1.8	#N/A	4	4	2.2	2.8	2.2	#N/A	3.3	3.3	1.8	1.9	1.8	#N/A	#N/A	#N/A	#N/A	#N/A	#N/A	#N/A	#N/A
2018-03-02 23:00:00	-2.1	3.1	-3.2	1.8	#N/A	3.5	3.5	2.2	2.8	2.2	#N/A	2.5	2.5	1.8	1.9	1.8	#N/A	#N/A	#N/A	#N/A	#N/A	#N/A	#N/A	#N/A
2018-03-03	-1.2	2.6	-2	2.1	#N/A	2.3	2.3	2.2	2.4	2.2	#N/A	1.4	1.4	1.8	1.4	1.8	#N/A	#N/A	#N/A	#N/A	#N/A	#N/A	#N/A	#N/A
2018-03-03 01:00:00	-0.4	2.6	-0.5	2.1	#N/A	1.6	1.6	2.2	2.4	2.2	#N/A	0.9	0.9	1.8	1.4	1.8	#N/A	#N/A	#N/A	#N/A	#N/A	#N/A	#N/A	#N/A
2018-03-03 02:00:00	-0.5	2.6	-0.4	2.1	#N/A	1.2	1.2	2.2	2.4	2.2	#N/A	0.5	0.5	1.8	1.4	1.8	#N/A	#N/A	#N/A	#N/A	#N/A	#N/A	#N/A	#N/A
2018-03-03 03:00:00	-0.4	2.6	-0.7	2.1	#N/A	1.2	1.2	2.2	2.4	2.2	#N/A	0.1	0.1	1.8	1.4	1.8	#N/A	#N/A	#N/A	#N/A	#N/A	#N/A	#N/A	#N/A
2018-03-03 04:00:00	0	2.6	-0.2	2.1	#N/A	1	1	2.2	2.4	2.2	#N/A	-0.2	-0.2	1.8	1.4	1.8	#N/A	#N/A	#N/A	#N/A	#N/A	#N/A	#N/A	#N/A
2018-03-03 05:00:00	0.1	2.6	0	2.1	#N/A	1	1	2.2	2.4	2.2	#N/A	-0.3	-0.3	1.8	1.4	1.8	#N/A	#N/A	#N/A	#N/A	#N/A	#N/A	#N/A	#N/A
2018-03-03 06:00:00	0.4	2.6	0.3	2.1	#N/A	1.3	1.3	2.2	2.4	2.2	#N/A	0.1	0.1	1.8	1.4	1.8	#N/A	#N/A	#N/A	#N/A	#N/A	#N/A	#N/A	#N/A
2018-03-03 07:00:00	1	2.6	1.2	2.1	#N/A	1.5	1.5	2.2	2.4	2.2	#N/A	0.7	0.7	1.8	1.4	1.8	#N/A	#N/A	#N/A	#N/A	#N/A	#N/A	#N/A	#N/A
2018-03-03 08:00:00	1.8	2.6	2.1	2.1	#N/A	1.5	1.5	2.2	2.4	2.2	#N/A	0.7	0.7	1.8	1.4	1.8	#N/A	#N/A	#N/A	#N/A	#N/A	#N/A	#N/A	#N/A
2018-03-03 09:00:00	2.9	2.6	1.4	2.1	#N/A	1.5	1.5	2.2	2.4	2.2	#N/A	0.6	0.6	1.8	1.4	1.8	#N/A	#N/A	#N/A	#N/A	#N/A	#N/A	#N/A	#N/A
2018-03-03 10:00:00	3.9	2.6	2.9	2.1	#N/A	1.7	1.7	2.2	2.4	2.2	#N/A	0.8	0.8	1.8	1.4	1.8	#N/A	#N/A	#N/A	#N/A	#N/A	#N/A	#N/A	#N/A
2018-03-03 11:00:00	5.3	2.6	4.4	2.1	#N/A	1.7	1.7	2.2	2.4	2.2	#N/A	0.8	0.8	1.8	1.4	1.8	#N/A	#N/A	#N/A	#N/A	#N/A	#N/A	#N/A	#N/A
2018-03-03 12:00:00	6.6	2.6	5.3	2.1	#N/A	1.7	1.7	2.2	2.4	2.2	#N/A	0.9	0.9	1.8	1.4	1.8	#N/A	#N/A	#N/A	#N/A	#N/A	#N/A	#N/A	#N/A
2018-03-03 13:00:00	8.1	2.6	5.1	2.1	#N/A	1.9	1.9	2.2	2.4	2.2	#N/A	1.2	1.2	1.8	1.4	1.8	#N/A	#N/A	#N/A	#N/A	#N/A	#N/A	#N/A	#N/A
2018-03-03 14:00:00	8	2.6	5.6	2.1	#N/A	2.1	2.1	2.2	2.4	2.2	#N/A	1.5	1.5	1.8	1.4	1.8	#N/A	#N/A	#N/A	#N/A	#N/A	#N/A	#N/A	#N/A
2018-03-03 15:00:00	9.1	2.6	6.3	2.1	#N/A	2.5	2.5	2.2	2.4	2.2	#N/A	1.2	1.2	1.8	1.4	1.8	#N/A	#N/A	#N/A	#N/A	#N/A	#N/A	#N/A	#N/A
2018-03-03 16:00:00	9.5	2.6	8.8	2.1	#N/A	2.8	2.8	2.2	2.4	2.2	#N/A	1.8	1.8	1.8	1.4	1.8	#N/A	#N/A	#N/A	#N/A	#N/A	#N/A	#N/A	#N/A
2018-03-03 17:00:00	8.4	2.6	6.9	2.1	#N/A	3.2	3.2	2.2	2.4	2.2	#N/A	2.4	2.4	1.8	1.4	1.8	#N/A	#N/A	#N/A	#N/A	#N/A	#N/A	#N/A	#N/A
2018-03-03 18:00:00	3.4	2.6	3.9	2.1	#N/A	3.6	3.6	2.2	2.4	2.2	#N/A	2.7	2.7	1.8	1.4	1.8	#N/A	#N/A	#N/A	#N/A	#N/A	#N/A	#N/A	#N/A
2018-03-03 19:00:00	1	2.6	1.2	2.1	#N/A	4.1	4.1	2.2	2.4	2.2	#N/A	2.6	2.6	1.8	1.4	1.8	#N/A	#N/A	#N/A	#N/A	#N/A	#N/A	#N/A	#N/A
2018-03-03 20:00:00	-0.2	2.6	0.5	2.1	#N/A	4	4	2.2	2.4	2.2	#N/A	2.8	2.8	1.8	1.4	1.8	#N/A	#N/A	#N/A	#N/A	#N/A	#N/A	#N/A	#N/A
2018-03-03 21:00:00	-1	2.6	0.7	2.1	#N/A	4.3	4.3	2.2	2.4	2.2	#N/A	3	3	1.8	1.4	1.8	#N/A	#N/A	#N/A	#N/A	#N/A	#N/A	#N/A	#N/A
2018-03-03 22:00:00	-1.2	2.6	-0.4	2.1	#N/A	4.4	4.4	2.2	2.4	2.2	#N/A	3.9	3.9	1.8	1.4	1.8	#N/A	#N/A	#N/A	#N/A	#N/A	#N/A	#N/A	#N/A
2018-03-03 23:00:00	-1.2	2.6	-1.2	2.1	#N/A	4.1	4.1	2.2	2.4	2.2	#N/A	3.2	3.2	1.8	1.4	1.8	#N/A	#N/A	#N/A	#N/A	#N/A	#N/A	#N/A	#N/A
2018-03-04	-1.4	3.5	-1.5	3.1	#N/A	2.6	2.6	2.2	2.3	2.2	#N/A	2.1	2.1	1.8	1.6	1.8	#N/A	#N/A	#N/A	#N/A	#N/A	#N/A	#N/A	#N/A
2018-03-04 01:00:00	-1.8	3.5	-1.6	3.1	#N/A	1.9	1.9	2.2	2.3	2.2	#N/A	1.1	1.1	1.8	1.6	1.8	#N/A	#N/A	#N/A	#N/A	#N/A	#N/A	#N/A	#N/A
2018-03-04 02:00:00	-2.4	3.5	-2.1	3.1	#N/A	1.5	1.5	2.2	2.3	2.2	#N/A	0.8	0.8	1.8	1.6	1.8	#N/A	#N/A	#N/A	#N/A	#N/A	#N/A	#N/A	#N/A
2018-03-04 03:00:00	-2.3	3.5	-1.8	3.1	#N/A	1.2	1.2	2.2	2.3	2.2	#N/A	0.9	0.9	1.8	1.6	1.8	#N/A	#N/A	#N/A	#N/A	#N/A	#N/A	#N/A	#N/A
2018-03-04 04:00:00	-2.9	3.5	-1.8	3.1	#N/A	1.1	1.1	2.2	2.3	2.2	#N/A	0.5	0.5	1.8	1.6	1.8	#N/A	#N/A	#N/A	#N/A	#N/A	#N/A	#N/A	#N/A
2018-03-04 05:00:00	-3	3.5	-2	3.1	#N/A	1.1	1.1	2.2	2.3	2.2	#N/A	0.2	0.2	1.8	1.6	1.8	#N/A	#N/A	#N/A	#N/A	#N/A	#N/A	#N/A	#N/A
2018-03-04 06:00:00	-3	3.5	-1.7	3.1	#N/A	1	1	2.2	2.3	2.2	#N/A	0	0	1.8	1.6	1.8	#N/A	#N/A	#N/A	#N/A	#N/A	#N/A	#N/A	#N/A
2018-03-04 07:00:00	-2.8	3.5	-0.8	3.1	#N/A	0.9	0.9	2.2	2.3	2.2	#N/A	0	0	1.8	1.6	1.8	#N/A	#N/A	#N/A	#N/A	#N/A	#N/A	#N/A	#N/A
2018-03-04 08:00:00	-0.8	3.5	0.5	3.1	#N/A	0.7	0.7	2.2	2.3	2.2	#N/A	-0.2	-0.2	1.8	1.6	1.8	#N/A	#N/A	#N/A	#N/A	#N/A	#N/A	#N/A	#N/A
2018-03-04 09:00:00	3.8	3.5	3.6	3.1	#N/A	0.7	0.7	2.2	2.3	2.2	#N/A	-0.1	-0.1	1.8	1.6	1.8	#N/A	#N/A	#N/A	#N/A	#N/A	#N/A	#N/A	#N/A
2018-03-04 10:00:00	9.6	3.5	7.7	3.1	#N/A	0.6	0.6	2.2	2.3	2.2	#N/A	-0.1	-0.1	1.8	1.6	1.8	#N/A	#N/A	#N/A	#N/A	#N/A	#N/A	#N/A	#N/A
2018-03-04 11:00:00	11	3.5	9.3	3.1	#N/A	0.6	0.6	2.2	2.3	2.2	#N/A	-0.1	-0.1	1.8	1.6	1.8	#N/A	#N/A	#N/A	#N/A	#N/A	#N/A	#N/A	#N/A
2018-03-04 12:00:00	10.2	3.5	9.3	3.1	#N/A	0.6	0.6	2.2	2.3	2.2	#N/A	0	0	1.8	1.6	1.8	#N/A	#N/A	#N/A	#N/A	#N/A	#N/A	#N/A	#N/A
2018-03-04 13:00:00	10.3	3.5	9.1	3.1	#N/A	0.7	0.7	2.2	2.3	2.2	#N/A	0.4	0.4	1.8	1.6	1.8	#N/A	#N/A	#N/A	#N/A	#N/A	#N/A	#N/A	#N/A
2018-03-04 14:00:00	10	3.5	8.7	3.1	#N/A	1.3	1.3	2.2	2.3	2.2	#N/A	0.9	0.9	1.8	1.6	1.8	#N/A	#N/A	#N/A	#N/A	#N/A	#N/A	#N/A	#N/A
2018-03-04 15:00:00	9.1	3.5	8.1	3.1	#N/A	2.7	2.7	2.2	2.3	2.2	#N/A	2	2	1.8	1.6	1.8	#N/A	#N/A	#N/A	#N/A	#N/A	#N/A	#N/A	#N/A
2018-03-04 16:00:00	8.5	3.5	7.3	3.1	#N/A	4.4	4.4	2.2	2.3	2.2	#N/A	3.5	3.5	1.8	1.6	1.8	#N/A	#N/A	#N/A	#N/A	#N/A	#N/A	#N/A	#N/A
2018-03-04 17:00:00	7.7	3.5	5.9	3.1	#N/A	4.9	4.9	2.2	2.3	2.2	#N/A	4.1	4.1	1.8	1.6	1.8	#N/A	#N/A	#N/A	#N/A	#N/A	#N/A	#N/A	#N/A
2018-03-04 18:00:00	5.6	3.5	4.3	3.1	#N/A	4.7	4.7	2.2	2.3	2.2	#N/A	4.1	4.1	1.8	1.6	1.8	#N/A	#N/A	#N/A	#N/A	#N/A	#N/A	#N/A	#N/A
2018-03-04 19:00:00	5	3.5	3.3	3.1	#N/A	4.7	4.7	2.2	2.3	2.2	#N/A	4.1	4.1	1.8	1.6	1.8	#N/A	#N/A	#N/A	#N/A	#N/A	#N/A	#N/A	#N/A
2018-03-04 20:00:00	3.5	3.5	2.9	3.1	#N/A	4.6	4.6	2.2	2.3	2.2	#N/A	3.9	3.9	1.8	1.6	1.8	#N/A	#N/A	#N/A	#N/A	#N/A	#N/A	#N/A	#N/A
2018-03-04 21:00:00	3.3	3.5	2.2	3.1	#N/A	4.4	4.4	2.2	2.3	2.2	#N/A	3.7	3.7	1.8	1.6	1.8	#N/A	#N/A	#N/A	#N/A	#N/A	#N/A	#N/A	#N/A
2018-03-04 22:00:00	3.4	3.5	2.4	3.1	#N/A	4.2	4.2	2.2	2.3	2.2	#N/A	3.5	3.5	1.8	1.6	1.8	#N/A	#N/A	#N/A	#N/A	#N/A	#N/A	#N/A	#N/A
2018-03-04 23:00:00	2.6	3.5	2.2	3.1	#N/A	4	4	2.2	2.3	2.2	#N/A	3	3	1.8	1.6	1.8	#N/A	#N/A	#N/A	#N/A	#N/A	#N/A	#N/A	#N/A
2018-03-05	2.3	3.6	1.8	2.8	#N/A	3.4	3.4	2.2	3.4	2.2	#N/A	2.4	2.4	1.8	2.4	1.8	#N/A	#N/A	#N/A	#N/A	#N/A	#N/A	#N/A	#N/A
2018-03-05 01:00:00	2	3.6	1.6	2.8	#N/A	3.2	3.2	2.2	3.4	2.2	#N/A	2.1	2.1	1.8	2.4	1.8	#N/A	#N/A	#N/A	#N/A	#N/A	#N/A	#N/A	#N/A
2018-03-05 02:00:00	1.9	3.6	1.7	2.8	#N/A	2.8	2.8	2.2	3.4	2.2	#N/A	2	2	1.8	2.4	1.8	#N/A	#N/A	#N/A	#N/A	#N/A	#N/A	#N/A	#N/A
2018-03-05 03:00:00	1.1	3.6	1.3	2.8	#N/A	2.8	2.8	2.2	3.4	2.2	#N/A	1.8	1.8	1.8	2.4	1.8	#N/A	#N/A	#N/A	#N/A	#N/A	#N/A	#N/A	#N/A
2018-03-05 04:00:00	0.4	3.6	1.1	2.8	#N/A	2.8	2.8	2.2	3.4	2.2	#N/A	1.9	1.9	1.8	2.4	1.8	#N/A	#N/A	#N/A	#N/A	#N/A	#N/A	#N/A	#N/A
2018-03-05 05:00:00	0.2	3.6	0.6	2.8	#N/A	2.6	2.6	2.2	3.4	2.2	#N/A	1.8	1.8	1.8	2.4	1.8	#N/A	#N/A	#N/A	#N/A	#N/A	#N/A	#N/A	#N/A
2018-03-05 06:00:00	0.2	3.6	0.4	2.8	#N/A	2.6	2.6	2.2	3.4	2.2	#N/A	1.7	1.7	1.8	2.4	1.8	#N/A	#N/A	#N/A	#N/A	#N/A	#N/A	#N/A	#N/A
2018-03-05 07:00:00	1.1	3.6	1.3	2.8	#N/A	2.5	2.5	2.2	3.4	2.2	#N/A	1.7	1.7	1.8	2.4	1.8	#N/A	#N/A	#N/A	#N/A	#N/A	#N/A	#N/A	#N/A
2018-03-05 08:00:00	4.5	3.6	3.5	2.8	#N/A	2.6	2.6	2.2	3.4	2.2	#N/A	1.8	1.8	1.8	2.4	1.8	#N/A	#N/A	#N/A	#N/A	#N/A	#N/A	#N/A	#N/A
2018-03-05 09:00:00	5.6	3.6	4	2.8	#N/A	2.4	2.4	2.2	3.4	2.2	#N/A	1.8	1.8	1.8	2.4	1.8	#N/A	#N/A	#N/A	#N/A	#N/A	#N/A	#N/A	#N/A
2018-03-05 10:00:00	5.7	3.6	4.4	2.8	#N/A	2.2	2.2	2.2	3.4	2.2	#N/A	1.7	1.7	1.8	2.4	1.8	#N/A	#N/A	#N/A	#N/A	#N/A	#N/A	#N/A	#N/A
2018-03-05 11:00:00	6.2	3.6	4.5	2.8	#N/A	2.2	2.2	2.2	3.4	2.2	#N/A	1.6	1.6	1.8	2.4	1.8	#N/A	#N/A	#N/A	#N/A	#N/A	#N/A	#N/A	#N/A
2018-03-05 12:00:00	5.8	3.6	4.6	2.8	#N/A	2.3	2.3	2.2	3.4	2.2	#N/A	1.5	1.5	1.8	2.4	1.8	#N/A	#N/A	#N/A	#N/A	#N/A	#N/A	#N/A	#N/A
2018-03-05 13:00:00	6.4	3.6	4.6	2.8	#N/A	2.6	2.6	2.2	3.4	2.2	#N/A	1.9	1.9	1.8	2.4	1.8	#N/A	#N/A	#N/A	#N/A	#N/A	#N/A	#N/A	#N/A
2018-03-05 14:00:00	7	3.6	4.8	2.8	#N/A	3.6	3.6	2.2	3.4	2.2	#N/A	2.7	2.7	1.8	2.4	1.8	#N/A	#N/A	#N/A	#N/A	#N/A	#N/A	#N/A	#N/A
2018-03-05 15:00:00	7.2	3.6	5.4	2.8	#N/A	4	4	2.2	3.4	2.2	#N/A	2.9	2.9	1.8	2.4	1.8	#N/A	#N/A	#N/A	#N/A	#N/A	#N/A	#N/A	#N/A
2018-03-05 16:00:00	6.9	3.6	5.4	2.8	#N/A	4.1	4.1	2.2	3.4	2.2	#N/A	3.1	3.1	1.8	2.4	1.8	#N/A	#N/A	#N/A	#N/A	#N/A	#N/A	#N/A	#N/A
2018-03-05 17:00:00	6.3	3.6	4.6	2.8	#N/A	4.3	4.3	2.2	3.4	2.2	#N/A	3.1	3.1	1.8	2.4	1.8	#N/A	#N/A	#N/A	#N/A	#N/A	#N/A	#N/A	#N/A
2018-03-05 18:00:00	3.9	3.6	3.4	2.8	#N/A	4.2	4.2	2.2	3.4	2.2	#N/A	3.2	3.2	1.8	2.4	1.8	#N/A	#N/A	#N/A	#N/A	#N/A	#N/A	#N/A	#N/A
2018-03-05 19:00:00	3.1	3.6	2.4	2.8	#N/A	4.4	4.4	2.2	3.4	2.2	#N/A	3.3	3.3	1.8	2.4	1.8	#N/A	#N/A	#N/A	#N/A	#N/A	#N/A	#N/A	#N/A
2018-03-05 20:00:00	2.4	3.6	1.8	2.8	#N/A	4.7	4.7	2.2	3.4	2.2	#N/A	3.4	3.4	1.8	2.4	1.8	#N/A	#N/A	#N/A	#N/A	#N/A	#N/A	#N/A	#N/A
2018-03-05 21:00:00	2.4	3.6	1.2	2.8	#N/A	4.8	4.8	2.2	3.4	2.2	#N/A	3.7	3.7	1.8	2.4	1.8	#N/A	#N/A	#N/A	#N/A	#N/A	#N/A	#N/A	#N/A
2018-03-05 22:00:00	2.3	3.6	1.3	2.8	#N/A	4.8	4.8	2.2	3.4	2.2	#N/A	3.7	3.7	1.8	2.4	1.8	#N/A	#N/A	#N/A	#N/A	#N/A	#N/A	#N/A	#N/A
2018-03-05 23:00:00	2.1	3.6	1	2.8	#N/A	4.6	4.6	2.2	3.4	2.2	#N/A	3.5	3.5	1.8	2.4	1.8	#N/A	#N/A	#N/A	#N/A	#N/A	#N/A	#N/A	#N/A
2018-03-06	2	3.9	0.9	2.8	#N/A	4	4	2.2	4.7	2.2	#N/A	3.1	3.1	1.8	3.5	1.8	#N/A	#N/A	#N/A	#N/A	#N/A	#N/A	#N/A	#N/A
2018-03-06 01:00:00	2	3.9	0.9	2.8	#N/A	3.8	3.8	2.2	4.7	2.2	#N/A	2.8	2.8	1.8	3.5	1.8	#N/A	#N/A	#N/A	#N/A	#N/A	#N/A	#N/A	#N/A
2018-03-06 02:00:00	2	3.9	1	2.8	#N/A	3.7	3.7	2.2	4.7	2.2	#N/A	2.7	2.7	1.8	3.5	1.8	#N/A	#N/A	#N/A	#N/A	#N/A	#N/A	#N/A	#N/A
2018-03-06 03:00:00	1.8	3.9	0.9	2.8	#N/A	3.7	3.7	2.2	4.7	2.2	#N/A	2.5	2.5	1.8	3.5	1.8	#N/A	#N/A	#N/A	#N/A	#N/A	#N/A	#N/A	#N/A
2018-03-06 04:00:00	1.7	3.9	0.8	2.8	#N/A	3.8	3.8	2.2	4.7	2.2	#N/A	2.6	2.6	1.8	3.5	1.8	#N/A	#N/A	#N/A	#N/A	#N/A	#N/A	#N/A	#N/A
2018-03-06 05:00:00	1.6	3.9	0.7	2.8	#N/A	3.8	3.8	2.2	4.7	2.2	#N/A	2.5	2.5	1.8	3.5	1.8	#N/A	#N/A	#N/A	#N/A	#N/A	#N/A	#N/A	#N/A
2018-03-06 06:00:00	1.8	3.9	0.6	2.8	#N/A	3.8	3.8	2.2	4.7	2.2	#N/A	2.5	2.5	1.8	3.5	1.8	#N/A	#N/A	#N/A	#N/A	#N/A	#N/A	#N/A	#N/A
2018-03-06 07:00:00	2.3	3.9	0.6	2.8	#N/A	3.9	3.9	2.2	4.7	2.2	#N/A	2.6	2.6	1.8	3.5	1.8	#N/A	#N/A	#N/A	#N/A	#N/A	#N/A	#N/A	#N/A
2018-03-06 08:00:00	3	3.9	1.3	2.8	#N/A	3.9	3.9	2.2	4.7	2.2	#N/A	2.7	2.7	1.8	3.5	1.8	#N/A	#N/A	#N/A	#N/A	#N/A	#N/A	#N/A	#N/A
2018-03-06 09:00:00	3.5	3.9	2.1	2.8	#N/A	3.9	3.9	2.2	4.7	2.2	#N/A	2.7	2.7	1.8	3.5	1.8	#N/A	#N/A	#N/A	#N/A	#N/A	#N/A	#N/A	#N/A
2018-03-06 10:00:00	3.8	3.9	2.4	2.8	#N/A	3.9	3.9	2.2	4.7	2.2	#N/A	2.7	2.7	1.8	3.5	1.8	#N/A	#N/A	#N/A	#N/A	#N/A	#N/A	#N/A	#N/A
2018-03-06 11:00:00	4.7	3.9	2.8	2.8	#N/A	4	4	2.2	4.7	2.2	#N/A	2.7	2.7	1.8	3.5	1.8	#N/A	#N/A	#N/A	#N/A	#N/A	#N/A	#N/A	#N/A
2018-03-06 12:00:00	6	3.9	4.3	2.8	#N/A	4.1	4.1	2.2	4.7	2.2	#N/A	2.8	2.8	1.8	3.5	1.8	#N/A	#N/A	#N/A	#N/A	#N/A	#N/A	#N/A	#N/A
2018-03-06 13:00:00	7.4	3.9	5.9	2.8	#N/A	4.3	4.3	2.2	4.7	2.2	#N/A	2.8	2.8	1.8	3.5	1.8	#N/A	#N/A	#N/A	#N/A	#N/A	#N/A	#N/A	#N/A
2018-03-06 14:00:00	8.6	3.9	7.5	2.8	#N/A	4.6	4.6	2.2	4.7	2.2	#N/A	3.1	3.1	1.8	3.5	1.8	#N/A	#N/A	#N/A	#N/A	#N/A	#N/A	#N/A	#N/A
2018-03-06 15:00:00	8.4	3.9	7.5	2.8	#N/A	4.8	4.8	2.2	4.7	2.2	#N/A	3.5	3.5	1.8	3.5	1.8	#N/A	#N/A	#N/A	#N/A	#N/A	#N/A	#N/A	#N/A
2018-03-06 16:00:00	8.7	3.9	6.1	2.8	#N/A	5	5	2.2	4.7	2.2	#N/A	3.6	3.6	1.8	3.5	1.8	#N/A	#N/A	#N/A	#N/A	#N/A	#N/A	#N/A	#N/A
2018-03-06 17:00:00	6.4	3.9	6.6	2.8	#N/A	5.3	5.3	2.2	4.7	2.2	#N/A	3.8	3.8	1.8	3.5	1.8	#N/A	#N/A	#N/A	#N/A	#N/A	#N/A	#N/A	#N/A
2018-03-06 18:00:00	4.2	3.9	4	2.8	#N/A	5.8	5.8	2.2	4.7	2.2	#N/A	4.4	4.4	1.8	3.5	1.8	#N/A	#N/A	#N/A	#N/A	#N/A	#N/A	#N/A	#N/A
2018-03-06 19:00:00	2.6	3.9	2.3	2.8	#N/A	6.3	6.3	2.2	4.7	2.2	#N/A	5.1	5.1	1.8	3.5	1.8	#N/A	#N/A	#N/A	#N/A	#N/A	#N/A	#N/A	#N/A
2018-03-06 20:00:00	2.7	3.9	2.3	2.8	#N/A	6.7	6.7	2.2	4.7	2.2	#N/A	5.7	5.7	1.8	3.5	1.8	#N/A	#N/A	#N/A	#N/A	#N/A	#N/A	#N/A	#N/A
2018-03-06 21:00:00	2.6	3.9	2.4	2.8	#N/A	6.7	6.7	2.2	4.7	2.2	#N/A	5.8	5.8	1.8	3.5	1.8	#N/A	#N/A	#N/A	#N/A	#N/A	#N/A	#N/A	#N/A
2018-03-06 22:00:00	3	3.9	2	2.8	#N/A	6.9	6.9	2.2	4.7	2.2	#N/A	5.4	5.4	1.8	3.5	1.8	#N/A	#N/A	#N/A	#N/A	#N/A	#N/A	#N/A	#N/A
2018-03-06 23:00:00	2.6	3.9	0.6	2.8	#N/A	6.3	6.3	2.2	4.7	2.2	#N/A	5.6	5.6	1.8	3.5	1.8	#N/A	#N/A	#N/A	#N/A	#N/A	#N/A	#N/A	#N/A
2018-03-07	2.2	3.3	0.8	2.4	#N/A	5.7	5.7	2.2	6.2	2.2	#N/A	4.7	4.7	1.8	4.8	1.8	#N/A	#N/A	#N/A	#N/A	#N/A	#N/A	#N/A	#N/A
2018-03-07 01:00:00	2.2	3.3	0.9	2.4	#N/A	5.3	5.3	2.2	6.2	2.2	#N/A	4.1	4.1	1.8	4.8	1.8	#N/A	#N/A	#N/A	#N/A	#N/A	#N/A	#N/A	#N/A
2018-03-07 02:00:00	2.4	3.3	1	2.4	#N/A	5.4	5.4	2.2	6.2	2.2	#N/A	4.2	4.2	1.8	4.8	1.8	#N/A	#N/A	#N/A	#N/A	#N/A	#N/A	#N/A	#N/A
2018-03-07 03:00:00	2.5	3.3	0.9	2.4	#N/A	5.4	5.4	2.2	6.2	2.2	#N/A	4.3	4.3	1.8	4.8	1.8	#N/A	#N/A	#N/A	#N/A	#N/A	#N/A	#N/A	#N/A
2018-03-07 04:00:00	2.4	3.3	0.8	2.4	#N/A	5.6	5.6	2.2	6.2	2.2	#N/A	4.2	4.2	1.8	4.8	1.8	#N/A	#N/A	#N/A	#N/A	#N/A	#N/A	#N/A	#N/A
2018-03-07 05:00:00	1.7	3.3	-0.3	2.4	#N/A	5.6	5.6	2.2	6.2	2.2	#N/A	3.8	3.8	1.8	4.8	1.8	#N/A	#N/A	#N/A	#N/A	#N/A	#N/A	#N/A	#N/A
2018-03-07 06:00:00	1.1	3.3	-0.7	2.4	#N/A	5.5	5.5	2.2	6.2	2.2	#N/A	3.9	3.9	1.8	4.8	1.8	#N/A	#N/A	#N/A	#N/A	#N/A	#N/A	#N/A	#N/A
2018-03-07 07:00:00	0.8	3.3	-1.3	2.4	#N/A	5.6	5.6	2.2	6.2	2.2	#N/A	4	4	1.8	4.8	1.8	#N/A	#N/A	#N/A	#N/A	#N/A	#N/A	#N/A	#N/A
2018-03-07 08:00:00	0.8	3.3	-1.2	2.4	#N/A	5.7	5.7	2.2	6.2	2.2	#N/A	4	4	1.8	4.8	1.8	#N/A	#N/A	#N/A	#N/A	#N/A	#N/A	#N/A	#N/A
2018-03-07 09:00:00	1.2	3.3	-0.3	2.4	#N/A	5.7	5.7	2.2	6.2	2.2	#N/A	4	4	1.8	4.8	1.8	#N/A	#N/A	#N/A	#N/A	#N/A	#N/A	#N/A	#N/A
2018-03-07 10:00:00	4	3.3	2.1	2.4	#N/A	5.7	5.7	2.2	6.2	2.2	#N/A	4	4	1.8	4.8	1.8	#N/A	#N/A	#N/A	#N/A	#N/A	#N/A	#N/A	#N/A
2018-03-07 11:00:00	7	3.3	5.2	2.4	#N/A	5.6	5.6	2.2	6.2	2.2	#N/A	3.7	3.7	1.8	4.8	1.8	#N/A	#N/A	#N/A	#N/A	#N/A	#N/A	#N/A	#N/A
2018-03-07 12:00:00	7.4	3.3	6.8	2.4	#N/A	5.4	5.4	2.2	6.2	2.2	#N/A	3.6	3.6	1.8	4.8	1.8	#N/A	#N/A	#N/A	#N/A	#N/A	#N/A	#N/A	#N/A
2018-03-07 13:00:00	8.7	3.3	8.3	2.4	#N/A	5.4	5.4	2.2	6.2	2.2	#N/A	3.4	3.4	1.8	4.8	1.8	#N/A	#N/A	#N/A	#N/A	#N/A	#N/A	#N/A	#N/A
2018-03-07 14:00:00	7.9	3.3	9.3	2.4	#N/A	5.5	5.5	2.2	6.2	2.2	#N/A	3.5	3.5	1.8	4.8	1.8	#N/A	#N/A	#N/A	#N/A	#N/A	#N/A	#N/A	#N/A
2018-03-07 15:00:00	8.6	3.3	9.2	2.4	#N/A	5.7	5.7	2.2	6.2	2.2	#N/A	3.9	3.9	1.8	4.8	1.8	#N/A	#N/A	#N/A	#N/A	#N/A	#N/A	#N/A	#N/A
2018-03-07 16:00:00	6.4	3.3	5.6	2.4	#N/A	6.5	6.5	2.2	6.2	2.2	#N/A	4.8	4.8	1.8	4.8	1.8	#N/A	#N/A	#N/A	#N/A	#N/A	#N/A	#N/A	#N/A
2018-03-07 17:00:00	7.7	3.3	5	2.4	#N/A	7.5	7.5	2.2	6.2	2.2	#N/A	6	6	1.8	4.8	1.8	#N/A	#N/A	#N/A	#N/A	#N/A	#N/A	#N/A	#N/A
2018-03-07 18:00:00	5	3.3	3.3	2.4	#N/A	7.7	7.7	2.2	6.2	2.2	#N/A	6.6	6.6	1.8	4.8	1.8	#N/A	#N/A	#N/A	#N/A	#N/A	#N/A	#N/A	#N/A
2018-03-07 19:00:00	2	3.3	1.7	2.4	#N/A	8.1	8.1	2.2	6.2	2.2	#N/A	7.2	7.2	1.8	4.8	1.8	#N/A	#N/A	#N/A	#N/A	#N/A	#N/A	#N/A	#N/A
2018-03-07 20:00:00	0.8	3.3	0.8	2.4	#N/A	7.9	7.9	2.2	6.2	2.2	#N/A	7.5	7.5	1.8	4.8	1.8	#N/A	#N/A	#N/A	#N/A	#N/A	#N/A	#N/A	#N/A
2018-03-07 21:00:00	-0.7	3.3	0	2.4	#N/A	8.1	8.1	2.2	6.2	2.2	#N/A	7.5	7.5	1.8	4.8	1.8	#N/A	#N/A	#N/A	#N/A	#N/A	#N/A	#N/A	#N/A
2018-03-07 22:00:00	-1.5	3.3	-0.7	2.4	#N/A	7.4	7.4	2.2	6.2	2.2	#N/A	6.2	6.2	1.8	4.8	1.8	#N/A	#N/A	#N/A	#N/A	#N/A	#N/A	#N/A	#N/A
2018-03-07 23:00:00	-2	3.3	-0.9	2.4	#N/A	7.8	7.8	2.2	6.2	2.2	#N/A	6	6	1.8	4.8	1.8	#N/A	#N/A	#N/A	#N/A	#N/A	#N/A	#N/A	#N/A
2018-03-08	-2.4	2.7	-2.1	2.5	#N/A	7	7	2.2	6.4	2.2	#N/A	5.4	5.4	1.8	5	1.8	#N/A	#N/A	#N/A	#N/A	#N/A	#N/A	#N/A	#N/A
2018-03-08 01:00:00	-2.5	2.7	-2.8	2.5	#N/A	6.1	6.1	2.2	6.4	2.2	#N/A	4.8	4.8	1.8	5	1.8	#N/A	#N/A	#N/A	#N/A	#N/A	#N/A	#N/A	#N/A
2018-03-08 02:00:00	-2.8	2.7	-3	2.5	#N/A	5.7	5.7	2.2	6.4	2.2	#N/A	4.5	4.5	1.8	5	1.8	#N/A	#N/A	#N/A	#N/A	#N/A	#N/A	#N/A	#N/A
2018-03-08 03:00:00	-2.6	2.7	-3.2	2.5	#N/A	5.2	5.2	2.2	6.4	2.2	#N/A	4.2	4.2	1.8	5	1.8	#N/A	#N/A	#N/A	#N/A	#N/A	#N/A	#N/A	#N/A
2018-03-08 04:00:00	-3	2.7	-3.6	2.5	#N/A	5	5	2.2	6.4	2.2	#N/A	3.9	3.9	1.8	5	1.8	#N/A	#N/A	#N/A	#N/A	#N/A	#N/A	#N/A	#N/A
2018-03-08 05:00:00	-3.6	2.7	-3.8	2.5	#N/A	4.8	4.8	2.2	6.4	2.2	#N/A	3.8	3.8	1.8	5	1.8	#N/A	#N/A	#N/A	#N/A	#N/A	#N/A	#N/A	#N/A
2018-03-08 06:00:00	-4.2	2.7	-4.1	2.5	#N/A	4.7	4.7	2.2	6.4	2.2	#N/A	3.4	3.4	1.8	5	1.8	#N/A	#N/A	#N/A	#N/A	#N/A	#N/A	#N/A	#N/A
2018-03-08 07:00:00	-3.8	2.7	-4.1	2.5	#N/A	4.6	4.6	2.2	6.4	2.2	#N/A	3.1	3.1	1.8	5	1.8	#N/A	#N/A	#N/A	#N/A	#N/A	#N/A	#N/A	#N/A
2018-03-08 08:00:00	1.7	2.7	-3	2.5	#N/A	4.5	4.5	2.2	6.4	2.2	#N/A	3	3	1.8	5	1.8	#N/A	#N/A	#N/A	#N/A	#N/A	#N/A	#N/A	#N/A
2018-03-08 09:00:00	6.9	2.7	1.1	2.5	#N/A	4.6	4.6	2.2	6.4	2.2	#N/A	3	3	1.8	5	1.8	#N/A	#N/A	#N/A	#N/A	#N/A	#N/A	#N/A	#N/A
2018-03-08 10:00:00	8.2	2.7	7	2.5	#N/A	4.5	4.5	2.2	6.4	2.2	#N/A	2.8	2.8	1.8	5	1.8	#N/A	#N/A	#N/A	#N/A	#N/A	#N/A	#N/A	#N/A
2018-03-08 11:00:00	9.1	2.7	8.4	2.5	#N/A	4.4	4.4	2.2	6.4	2.2	#N/A	2.8	2.8	1.8	5	1.8	#N/A	#N/A	#N/A	#N/A	#N/A	#N/A	#N/A	#N/A
2018-03-08 12:00:00	9.9	2.7	10	2.5	#N/A	4.3	4.3	2.2	6.4	2.2	#N/A	2.7	2.7	1.8	5	1.8	#N/A	#N/A	#N/A	#N/A	#N/A	#N/A	#N/A	#N/A
2018-03-08 13:00:00	10.6	2.7	11	2.5	#N/A	4.5	4.5	2.2	6.4	2.2	#N/A	2.8	2.8	1.8	5	1.8	#N/A	#N/A	#N/A	#N/A	#N/A	#N/A	#N/A	#N/A
2018-03-08 14:00:00	10.3	2.7	11.2	2.5	#N/A	6.1	6.1	2.2	6.4	2.2	#N/A	3.2	3.2	1.8	5	1.8	#N/A	#N/A	#N/A	#N/A	#N/A	#N/A	#N/A	#N/A
2018-03-08 15:00:00	10	2.7	10.9	2.5	#N/A	7.7	7.7	2.2	6.4	2.2	#N/A	4.7	4.7	1.8	5	1.8	#N/A	#N/A	#N/A	#N/A	#N/A	#N/A	#N/A	#N/A
2018-03-08 16:00:00	9.7	2.7	9.8	2.5	#N/A	8.2	8.2	2.2	6.4	2.2	#N/A	6.9	6.9	1.8	5	1.8	#N/A	#N/A	#N/A	#N/A	#N/A	#N/A	#N/A	#N/A
2018-03-08 17:00:00	9	2.7	7	2.5	#N/A	8.5	8.5	2.2	6.4	2.2	#N/A	7.4	7.4	1.8	5	1.8	#N/A	#N/A	#N/A	#N/A	#N/A	#N/A	#N/A	#N/A
2018-03-08 18:00:00	4.7	2.7	5.2	2.5	#N/A	8.7	8.7	2.2	6.4	2.2	#N/A	8	8	1.8	5	1.8	#N/A	#N/A	#N/A	#N/A	#N/A	#N/A	#N/A	#N/A
2018-03-08 19:00:00	1.8	2.7	3.7	2.5	#N/A	8.9	8.9	2.2	6.4	2.2	#N/A	8.4	8.4	1.8	5	1.8	#N/A	#N/A	#N/A	#N/A	#N/A	#N/A	#N/A	#N/A
2018-03-08 20:00:00	0.4	2.7	2.1	2.5	#N/A	8.9	8.9	2.2	6.4	2.2	#N/A	8.5	8.5	1.8	5	1.8	#N/A	#N/A	#N/A	#N/A	#N/A	#N/A	#N/A	#N/A
2018-03-08 21:00:00	-0.7	2.7	0.7	2.5	#N/A	8.8	8.8	2.2	6.4	2.2	#N/A	8.3	8.3	1.8	5	1.8	#N/A	#N/A	#N/A	#N/A	#N/A	#N/A	#N/A	#N/A
2018-03-08 22:00:00	-1.6	2.7	0.8	2.5	#N/A	8.6	8.6	2.2	6.4	2.2	#N/A	7.9	7.9	1.8	5	1.8	#N/A	#N/A	#N/A	#N/A	#N/A	#N/A	#N/A	#N/A
2018-03-08 23:00:00	-1.7	2.7	0	2.5	#N/A	8.4	8.4	2.2	6.4	2.2	#N/A	6.9	6.9	1.8	5	1.8	#N/A	#N/A	#N/A	#N/A	#N/A	#N/A	#N/A	#N/A
2018-03-09	-2	5.3	-0.7	5	#N/A	7.1	7.1	2.2	6.7	2.2	#N/A	6.2	6.2	1.8	5.9	1.8	#N/A	#N/A	#N/A	#N/A	#N/A	#N/A	#N/A	#N/A
2018-03-09 01:00:00	-2.3	5.3	-1.4	5	#N/A	6.2	6.2	2.2	6.7	2.2	#N/A	5.7	5.7	1.8	5.9	1.8	#N/A	#N/A	#N/A	#N/A	#N/A	#N/A	#N/A	#N/A
2018-03-09 02:00:00	-2.4	5.3	-1.6	5	#N/A	5.7	5.7	2.2	6.7	2.2	#N/A	5.1	5.1	1.8	5.9	1.8	#N/A	#N/A	#N/A	#N/A	#N/A	#N/A	#N/A	#N/A
2018-03-09 03:00:00	-2.7	5.3	-1	5	#N/A	5.3	5.3	2.2	6.7	2.2	#N/A	4.6	4.6	1.8	5.9	1.8	#N/A	#N/A	#N/A	#N/A	#N/A	#N/A	#N/A	#N/A
2018-03-09 04:00:00	-2.8	5.3	-1.7	5	#N/A	5	5	2.2	6.7	2.2	#N/A	4.6	4.6	1.8	5.9	1.8	#N/A	#N/A	#N/A	#N/A	#N/A	#N/A	#N/A	#N/A
2018-03-09 05:00:00	-2.8	5.3	-1	5	#N/A	4.9	4.9	2.2	6.7	2.2	#N/A	4.3	4.3	1.8	5.9	1.8	#N/A	#N/A	#N/A	#N/A	#N/A	#N/A	#N/A	#N/A
2018-03-09 06:00:00	-2.3	5.3	-1	5	#N/A	4.8	4.8	2.2	6.7	2.2	#N/A	4	4	1.8	5.9	1.8	#N/A	#N/A	#N/A	#N/A	#N/A	#N/A	#N/A	#N/A
2018-03-09 07:00:00	-2	5.3	-0.4	5	#N/A	4.7	4.7	2.2	6.7	2.2	#N/A	3.8	3.8	1.8	5.9	1.8	#N/A	#N/A	#N/A	#N/A	#N/A	#N/A	#N/A	#N/A
2018-03-09 08:00:00	3.7	5.3	0.4	5	#N/A	4.7	4.7	2.2	6.7	2.2	#N/A	3.7	3.7	1.8	5.9	1.8	#N/A	#N/A	#N/A	#N/A	#N/A	#N/A	#N/A	#N/A
2018-03-09 09:00:00	8.1	5.3	3.4	5	#N/A	4.6	4.6	2.2	6.7	2.2	#N/A	3.9	3.9	1.8	5.9	1.8	#N/A	#N/A	#N/A	#N/A	#N/A	#N/A	#N/A	#N/A
2018-03-09 10:00:00	9.9	5.3	9.1	5	#N/A	4.6	4.6	2.2	6.7	2.2	#N/A	3.7	3.7	1.8	5.9	1.8	#N/A	#N/A	#N/A	#N/A	#N/A	#N/A	#N/A	#N/A
2018-03-09 11:00:00	11.3	5.3	10.4	5	#N/A	4.7	4.7	2.2	6.7	2.2	#N/A	4	4	1.8	5.9	1.8	#N/A	#N/A	#N/A	#N/A	#N/A	#N/A	#N/A	#N/A
2018-03-09 12:00:00	12.3	5.3	12.2	5	#N/A	4.9	4.9	2.2	6.7	2.2	#N/A	4	4	1.8	5.9	1.8	#N/A	#N/A	#N/A	#N/A	#N/A	#N/A	#N/A	#N/A
2018-03-09 13:00:00	12.7	5.3	13.2	5	#N/A	5	5	2.2	6.7	2.2	#N/A	4.3	4.3	1.8	5.9	1.8	#N/A	#N/A	#N/A	#N/A	#N/A	#N/A	#N/A	#N/A
2018-03-09 14:00:00	13.7	5.3	13.3	5	#N/A	6.8	6.8	2.2	6.7	2.2	#N/A	4.7	4.7	1.8	5.9	1.8	#N/A	#N/A	#N/A	#N/A	#N/A	#N/A	#N/A	#N/A
2018-03-09 15:00:00	12.2	5.3	12.8	5	#N/A	8.1	8.1	2.2	6.7	2.2	#N/A	5.8	5.8	1.8	5.9	1.8	#N/A	#N/A	#N/A	#N/A	#N/A	#N/A	#N/A	#N/A
2018-03-09 16:00:00	10.6	5.3	11.3	5	#N/A	8.7	8.7	2.2	6.7	2.2	#N/A	7.9	7.9	1.8	5.9	1.8	#N/A	#N/A	#N/A	#N/A	#N/A	#N/A	#N/A	#N/A
2018-03-09 17:00:00	9.4	5.3	8.2	5	#N/A	9.1	9.1	2.2	6.7	2.2	#N/A	8.4	8.4	1.8	5.9	1.8	#N/A	#N/A	#N/A	#N/A	#N/A	#N/A	#N/A	#N/A
2018-03-09 18:00:00	8.4	5.3	6.9	5	#N/A	9.4	9.4	2.2	6.7	2.2	#N/A	9	9	1.8	5.9	1.8	#N/A	#N/A	#N/A	#N/A	#N/A	#N/A	#N/A	#N/A
2018-03-09 19:00:00	7.7	5.3	6.1	5	#N/A	9.6	9.6	2.2	6.7	2.2	#N/A	9.4	9.4	1.8	5.9	1.8	#N/A	#N/A	#N/A	#N/A	#N/A	#N/A	#N/A	#N/A
2018-03-09 20:00:00	7.3	5.3	5.6	5	#N/A	10	10	2.2	6.7	2.2	#N/A	9.5	9.5	1.8	5.9	1.8	#N/A	#N/A	#N/A	#N/A	#N/A	#N/A	#N/A	#N/A
2018-03-09 21:00:00	6.9	5.3	5.6	5	#N/A	9.6	9.6	2.2	6.7	2.2	#N/A	9.4	9.4	1.8	5.9	1.8	#N/A	#N/A	#N/A	#N/A	#N/A	#N/A	#N/A	#N/A
2018-03-09 22:00:00	6.9	5.3	5.5	5	#N/A	9.2	9.2	2.2	6.7	2.2	#N/A	8.8	8.8	1.8	5.9	1.8	#N/A	#N/A	#N/A	#N/A	#N/A	#N/A	#N/A	#N/A
2018-03-09 23:00:00	6.6	5.3	5.7	5	#N/A	8.9	8.9	2.2	6.7	2.2	#N/A	7.8	7.8	1.8	5.9	1.8	#N/A	#N/A	#N/A	#N/A	#N/A	#N/A	#N/A	#N/A
2018-03-10	6.7	9.9	5.8	7.2	#N/A	8.6	8.6	2.2	9.2	2.2	#N/A	7.3	7.3	1.8	7.6	1.8	#N/A	#N/A	#N/A	#N/A	#N/A	#N/A	#N/A	#N/A
2018-03-10 01:00:00	6.6	9.9	5.7	7.2	#N/A	8.4	8.4	2.2	9.2	2.2	#N/A	7.1	7.1	1.8	7.6	1.8	#N/A	#N/A	#N/A	#N/A	#N/A	#N/A	#N/A	#N/A
2018-03-10 02:00:00	8.7	9.9	5.9	7.2	#N/A	8.4	8.4	2.2	9.2	2.2	#N/A	7	7	1.8	7.6	1.8	#N/A	#N/A	#N/A	#N/A	#N/A	#N/A	#N/A	#N/A
2018-03-10 03:00:00	7.8	9.9	5.8	7.2	#N/A	8.3	8.3	2.2	9.2	2.2	#N/A	7	7	1.8	7.6	1.8	#N/A	#N/A	#N/A	#N/A	#N/A	#N/A	#N/A	#N/A
2018-03-10 04:00:00	7.4	9.9	5.1	7.2	#N/A	8.4	8.4	2.2	9.2	2.2	#N/A	7	7	1.8	7.6	1.8	#N/A	#N/A	#N/A	#N/A	#N/A	#N/A	#N/A	#N/A
2018-03-10 05:00:00	6.8	9.9	6.2	7.2	#N/A	8.3	8.3	2.2	9.2	2.2	#N/A	7.1	7.1	1.8	7.6	1.8	#N/A	#N/A	#N/A	#N/A	#N/A	#N/A	#N/A	#N/A
2018-03-10 06:00:00	9.7	9.9	6.2	7.2	#N/A	8.4	8.4	2.2	9.2	2.2	#N/A	7.1	7.1	1.8	7.6	1.8	#N/A	#N/A	#N/A	#N/A	#N/A	#N/A	#N/A	#N/A
2018-03-10 07:00:00	9.2	9.9	6	7.2	#N/A	8.4	8.4	2.2	9.2	2.2	#N/A	7.1	7.1	1.8	7.6	1.8	#N/A	#N/A	#N/A	#N/A	#N/A	#N/A	#N/A	#N/A
2018-03-10 08:00:00	9.1	9.9	6.6	7.2	#N/A	9.1	9.1	2.2	9.2	2.2	#N/A	7.2	7.2	1.8	7.6	1.8	#N/A	#N/A	#N/A	#N/A	#N/A	#N/A	#N/A	#N/A
2018-03-10 09:00:00	9.5	9.9	6.5	7.2	#N/A	8.9	8.9	2.2	9.2	2.2	#N/A	7.2	7.2	1.8	7.6	1.8	#N/A	#N/A	#N/A	#N/A	#N/A	#N/A	#N/A	#N/A
2018-03-10 10:00:00	9.4	9.9	6.7	7.2	#N/A	8.8	8.8	2.2	9.2	2.2	#N/A	7	7	1.8	7.6	1.8	#N/A	#N/A	#N/A	#N/A	#N/A	#N/A	#N/A	#N/A
2018-03-10 11:00:00	9.8	9.9	7	7.2	#N/A	8.7	8.7	2.2	9.2	2.2	#N/A	7.4	7.4	1.8	7.6	1.8	#N/A	#N/A	#N/A	#N/A	#N/A	#N/A	#N/A	#N/A
2018-03-10 12:00:00	10.1	9.9	7.9	7.2	#N/A	9.5	9.5	2.2	9.2	2.2	#N/A	7.4	7.4	1.8	7.6	1.8	#N/A	#N/A	#N/A	#N/A	#N/A	#N/A	#N/A	#N/A
2018-03-10 13:00:00	10.3	9.9	8	7.2	#N/A	9.4	9.4	2.2	9.2	2.2	#N/A	7.4	7.4	1.8	7.6	1.8	#N/A	#N/A	#N/A	#N/A	#N/A	#N/A	#N/A	#N/A
2018-03-10 14:00:00	11.1	9.9	8.3	7.2	#N/A	9.4	9.4	2.2	9.2	2.2	#N/A	7.6	7.6	1.8	7.6	1.8	#N/A	#N/A	#N/A	#N/A	#N/A	#N/A	#N/A	#N/A
2018-03-10 15:00:00	11.6	9.9	9.1	7.2	#N/A	9.5	9.5	2.2	9.2	2.2	#N/A	7.6	7.6	1.8	7.6	1.8	#N/A	#N/A	#N/A	#N/A	#N/A	#N/A	#N/A	#N/A
2018-03-10 16:00:00	10.9	9.9	8.6	7.2	#N/A	9.5	9.5	2.2	9.2	2.2	#N/A	7.6	7.6	1.8	7.6	1.8	#N/A	#N/A	#N/A	#N/A	#N/A	#N/A	#N/A	#N/A
2018-03-10 17:00:00	11.1	9.9	8.8	7.2	#N/A	9.6	9.6	2.2	9.2	2.2	#N/A	7.8	7.8	1.8	7.6	1.8	#N/A	#N/A	#N/A	#N/A	#N/A	#N/A	#N/A	#N/A
2018-03-10 18:00:00	11.3	9.9	8.4	7.2	#N/A	9.8	9.8	2.2	9.2	2.2	#N/A	8.1	8.1	1.8	7.6	1.8	#N/A	#N/A	#N/A	#N/A	#N/A	#N/A	#N/A	#N/A
2018-03-10 19:00:00	12.1	9.9	8.1	7.2	#N/A	9.9	9.9	2.2	9.2	2.2	#N/A	8.2	8.2	1.8	7.6	1.8	#N/A	#N/A	#N/A	#N/A	#N/A	#N/A	#N/A	#N/A
2018-03-10 20:00:00	12.2	9.9	7.8	7.2	#N/A	10.2	10.2	2.2	9.2	2.2	#N/A	8.3	8.3	1.8	7.6	1.8	#N/A	#N/A	#N/A	#N/A	#N/A	#N/A	#N/A	#N/A
2018-03-10 21:00:00	12.1	9.9	7.9	7.2	#N/A	10.5	10.5	2.2	9.2	2.2	#N/A	8.7	8.7	1.8	7.6	1.8	#N/A	#N/A	#N/A	#N/A	#N/A	#N/A	#N/A	#N/A
2018-03-10 22:00:00	12.3	9.9	7.7	7.2	#N/A	10.3	10.3	2.2	9.2	2.2	#N/A	8.5	8.5	1.8	7.6	1.8	#N/A	#N/A	#N/A	#N/A	#N/A	#N/A	#N/A	#N/A
2018-03-10 23:00:00	11.7	9.9	7.6	7.2	#N/A	10.5	10.5	2.2	9.2	2.2	#N/A	8.6	8.6	1.8	7.6	1.8	#N/A	#N/A	#N/A	#N/A	#N/A	#N/A	#N/A	#N/A
2018-03-11	9.7	7.7	7.3	5.9	#N/A	10.6	10.6	2.2	10.5	2.2	#N/A	8.5	8.5	1.8	8.2	1.8	#N/A	#N/A	#N/A	#N/A	#N/A	#N/A	#N/A	#N/A
2018-03-11 01:00:00	9.7	7.7	6.4	5.9	#N/A	10.9	10.9	2.2	10.5	2.2	#N/A	8.5	8.5	1.8	8.2	1.8	#N/A	#N/A	#N/A	#N/A	#N/A	#N/A	#N/A	#N/A
2018-03-11 02:00:00	10	7.7	6.2	5.9	#N/A	11	11	2.2	10.5	2.2	#N/A	8.4	8.4	1.8	8.2	1.8	#N/A	#N/A	#N/A	#N/A	#N/A	#N/A	#N/A	#N/A
2018-03-11 03:00:00	10.7	7.7	6.3	5.9	#N/A	11.1	11.1	2.2	10.5	2.2	#N/A	8.5	8.5	1.8	8.2	1.8	#N/A	#N/A	#N/A	#N/A	#N/A	#N/A	#N/A	#N/A
2018-03-11 04:00:00	10.3	7.7	6.4	5.9	#N/A	11.2	11.2	2.2	10.5	2.2	#N/A	8.5	8.5	1.8	8.2	1.8	#N/A	#N/A	#N/A	#N/A	#N/A	#N/A	#N/A	#N/A
2018-03-11 05:00:00	9.7	7.7	6.5	5.9	#N/A	11.1	11.1	2.2	10.5	2.2	#N/A	8.5	8.5	1.8	8.2	1.8	#N/A	#N/A	#N/A	#N/A	#N/A	#N/A	#N/A	#N/A
2018-03-11 06:00:00	9.4	7.7	6.1	5.9	#N/A	10.6	10.6	2.2	10.5	2.2	#N/A	8.4	8.4	1.8	8.2	1.8	#N/A	#N/A	#N/A	#N/A	#N/A	#N/A	#N/A	#N/A
2018-03-11 07:00:00	7.3	7.7	5.9	5.9	#N/A	10.7	10.7	2.2	10.5	2.2	#N/A	8.1	8.1	1.8	8.2	1.8	#N/A	#N/A	#N/A	#N/A	#N/A	#N/A	#N/A	#N/A
2018-03-11 08:00:00	6.9	7.7	5.7	5.9	#N/A	10.8	10.8	2.2	10.5	2.2	#N/A	8.1	8.1	1.8	8.2	1.8	#N/A	#N/A	#N/A	#N/A	#N/A	#N/A	#N/A	#N/A
2018-03-11 09:00:00	6.9	7.7	5.4	5.9	#N/A	11	11	2.2	10.5	2.2	#N/A	8.1	8.1	1.8	8.2	1.8	#N/A	#N/A	#N/A	#N/A	#N/A	#N/A	#N/A	#N/A
2018-03-11 10:00:00	6.9	7.7	5.7	5.9	#N/A	10.9	10.9	2.2	10.5	2.2	#N/A	8.1	8.1	1.8	8.2	1.8	#N/A	#N/A	#N/A	#N/A	#N/A	#N/A	#N/A	#N/A
2018-03-11 11:00:00	7	7.7	5.6	5.9	#N/A	10.7	10.7	2.2	10.5	2.2	#N/A	8.2	8.2	1.8	8.2	1.8	#N/A	#N/A	#N/A	#N/A	#N/A	#N/A	#N/A	#N/A
2018-03-11 12:00:00	6.7	7.7	5.5	5.9	#N/A	10.6	10.6	2.2	10.5	2.2	#N/A	8	8	1.8	8.2	1.8	#N/A	#N/A	#N/A	#N/A	#N/A	#N/A	#N/A	#N/A
2018-03-11 13:00:00	7.9	7.7	6.1	5.9	#N/A	10	10	2.2	10.5	2.2	#N/A	7.9	7.9	1.8	8.2	1.8	#N/A	#N/A	#N/A	#N/A	#N/A	#N/A	#N/A	#N/A
2018-03-11 14:00:00	8.3	7.7	7.1	5.9	#N/A	9.8	9.8	2.2	10.5	2.2	#N/A	7.8	7.8	1.8	8.2	1.8	#N/A	#N/A	#N/A	#N/A	#N/A	#N/A	#N/A	#N/A
2018-03-11 15:00:00	10.2	7.7	9.1	5.9	#N/A	9.8	9.8	2.2	10.5	2.2	#N/A	7.7	7.7	1.8	8.2	1.8	#N/A	#N/A	#N/A	#N/A	#N/A	#N/A	#N/A	#N/A
2018-03-11 16:00:00	9.7	7.7	8.1	5.9	#N/A	9.9	9.9	2.2	10.5	2.2	#N/A	7.8	7.8	1.8	8.2	1.8	#N/A	#N/A	#N/A	#N/A	#N/A	#N/A	#N/A	#N/A
2018-03-11 17:00:00	6.8	7.7	7.4	5.9	#N/A	9.9	9.9	2.2	10.5	2.2	#N/A	7.8	7.8	1.8	8.2	1.8	#N/A	#N/A	#N/A	#N/A	#N/A	#N/A	#N/A	#N/A
2018-03-11 18:00:00	6.2	7.7	5.8	5.9	#N/A	9.8	9.8	2.2	10.5	2.2	#N/A	7.8	7.8	1.8	8.2	1.8	#N/A	#N/A	#N/A	#N/A	#N/A	#N/A	#N/A	#N/A
2018-03-11 19:00:00	5.1	7.7	4.2	5.9	#N/A	10.1	10.1	2.2	10.5	2.2	#N/A	8	8	1.8	8.2	1.8	#N/A	#N/A	#N/A	#N/A	#N/A	#N/A	#N/A	#N/A
2018-03-11 20:00:00	4.9	7.7	3.5	5.9	#N/A	10.3	10.3	2.2	10.5	2.2	#N/A	8.4	8.4	1.8	8.2	1.8	#N/A	#N/A	#N/A	#N/A	#N/A	#N/A	#N/A	#N/A
2018-03-11 21:00:00	4.7	7.7	3.7	5.9	#N/A	10.9	10.9	2.2	10.5	2.2	#N/A	9.1	9.1	1.8	8.2	1.8	#N/A	#N/A	#N/A	#N/A	#N/A	#N/A	#N/A	#N/A
2018-03-11 22:00:00	4.7	7.7	3.9	5.9	#N/A	10.7	10.7	2.2	10.5	2.2	#N/A	8.8	8.8	1.8	8.2	1.8	#N/A	#N/A	#N/A	#N/A	#N/A	#N/A	#N/A	#N/A
2018-03-11 23:00:00	4.7	7.7	4	5.9	#N/A	9.8	9.8	2.2	10.5	2.2	#N/A	8.5	8.5	1.8	8.2	1.8	#N/A	#N/A	#N/A	#N/A	#N/A	#N/A	#N/A	#N/A
2018-03-12	4.7	5.2	4.2	3.9	#N/A	9.7	9.7	2.2	9.6	2.2	#N/A	8	8	1.8	7.5	1.8	#N/A	#N/A	#N/A	#N/A	#N/A	#N/A	#N/A	#N/A
2018-03-12 01:00:00	4.2	5.2	4.3	3.9	#N/A	9.4	9.4	2.2	9.6	2.2	#N/A	7.4	7.4	1.8	7.5	1.8	#N/A	#N/A	#N/A	#N/A	#N/A	#N/A	#N/A	#N/A
2018-03-12 02:00:00	3.2	5.2	2.6	3.9	#N/A	9.3	9.3	2.2	9.6	2.2	#N/A	7.1	7.1	1.8	7.5	1.8	#N/A	#N/A	#N/A	#N/A	#N/A	#N/A	#N/A	#N/A
2018-03-12 03:00:00	3.6	5.2	2.8	3.9	#N/A	9.3	9.3	2.2	9.6	2.2	#N/A	7.2	7.2	1.8	7.5	1.8	#N/A	#N/A	#N/A	#N/A	#N/A	#N/A	#N/A	#N/A
2018-03-12 04:00:00	4.1	5.2	2.6	3.9	#N/A	9.3	9.3	2.2	9.6	2.2	#N/A	7.3	7.3	1.8	7.5	1.8	#N/A	#N/A	#N/A	#N/A	#N/A	#N/A	#N/A	#N/A
2018-03-12 05:00:00	4.1	5.2	2.4	3.9	#N/A	9.3	9.3	2.2	9.6	2.2	#N/A	7.4	7.4	1.8	7.5	1.8	#N/A	#N/A	#N/A	#N/A	#N/A	#N/A	#N/A	#N/A
2018-03-12 06:00:00	3.9	5.2	2.4	3.9	#N/A	9.4	9.4	2.2	9.6	2.2	#N/A	7.4	7.4	1.8	7.5	1.8	#N/A	#N/A	#N/A	#N/A	#N/A	#N/A	#N/A	#N/A
2018-03-12 07:00:00	4.4	5.2	2.5	3.9	#N/A	9.2	9.2	2.2	9.6	2.2	#N/A	7.5	7.5	1.8	7.5	1.8	#N/A	#N/A	#N/A	#N/A	#N/A	#N/A	#N/A	#N/A
2018-03-12 08:00:00	4.7	5.2	3.1	3.9	#N/A	8.9	8.9	2.2	9.6	2.2	#N/A	6.9	6.9	1.8	7.5	1.8	#N/A	#N/A	#N/A	#N/A	#N/A	#N/A	#N/A	#N/A
2018-03-12 09:00:00	5.6	5.2	4.2	3.9	#N/A	9.1	9.1	2.2	9.6	2.2	#N/A	6.9	6.9	1.8	7.5	1.8	#N/A	#N/A	#N/A	#N/A	#N/A	#N/A	#N/A	#N/A
2018-03-12 10:00:00	6	5.2	4.7	3.9	#N/A	9.2	9.2	2.2	9.6	2.2	#N/A	6.9	6.9	1.8	7.5	1.8	#N/A	#N/A	#N/A	#N/A	#N/A	#N/A	#N/A	#N/A
2018-03-12 11:00:00	7.2	5.2	5.6	3.9	#N/A	9.2	9.2	2.2	9.6	2.2	#N/A	6.8	6.8	1.8	7.5	1.8	#N/A	#N/A	#N/A	#N/A	#N/A	#N/A	#N/A	#N/A
2018-03-12 12:00:00	8.7	5.2	7.5	3.9	#N/A	9.2	9.2	2.2	9.6	2.2	#N/A	6.8	6.8	1.8	7.5	1.8	#N/A	#N/A	#N/A	#N/A	#N/A	#N/A	#N/A	#N/A
2018-03-12 13:00:00	8.2	5.2	6.6	3.9	#N/A	9.3	9.3	2.2	9.6	2.2	#N/A	6.9	6.9	1.8	7.5	1.8	#N/A	#N/A	#N/A	#N/A	#N/A	#N/A	#N/A	#N/A
2018-03-12 14:00:00	7.5	5.2	6.2	3.9	#N/A	9.4	9.4	2.2	9.6	2.2	#N/A	7.1	7.1	1.8	7.5	1.8	#N/A	#N/A	#N/A	#N/A	#N/A	#N/A	#N/A	#N/A
2018-03-12 15:00:00	8.8	5.2	6.8	3.9	#N/A	9.7	9.7	2.2	9.6	2.2	#N/A	7.5	7.5	1.8	7.5	1.8	#N/A	#N/A	#N/A	#N/A	#N/A	#N/A	#N/A	#N/A
2018-03-12 16:00:00	4.9	5.2	5.4	3.9	#N/A	9.8	9.8	2.2	9.6	2.2	#N/A	7.7	7.7	1.8	7.5	1.8	#N/A	#N/A	#N/A	#N/A	#N/A	#N/A	#N/A	#N/A
2018-03-12 17:00:00	5.2	5.2	5	3.9	#N/A	10.2	10.2	2.2	9.6	2.2	#N/A	8	8	1.8	7.5	1.8	#N/A	#N/A	#N/A	#N/A	#N/A	#N/A	#N/A	#N/A
2018-03-12 18:00:00	4.8	5.2	3.7	3.9	#N/A	10.6	10.6	2.2	9.6	2.2	#N/A	8.7	8.7	1.8	7.5	1.8	#N/A	#N/A	#N/A	#N/A	#N/A	#N/A	#N/A	#N/A
2018-03-12 19:00:00	4.7	5.2	3.3	3.9	#N/A	10.5	10.5	2.2	9.6	2.2	#N/A	8.4	8.4	1.8	7.5	1.8	#N/A	#N/A	#N/A	#N/A	#N/A	#N/A	#N/A	#N/A
2018-03-12 20:00:00	4.5	5.2	3	3.9	#N/A	10.3	10.3	2.2	9.6	2.2	#N/A	8.2	8.2	1.8	7.5	1.8	#N/A	#N/A	#N/A	#N/A	#N/A	#N/A	#N/A	#N/A
2018-03-12 21:00:00	3.9	5.2	2.4	3.9	#N/A	10.7	10.7	2.2	9.6	2.2	#N/A	8.5	8.5	1.8	7.5	1.8	#N/A	#N/A	#N/A	#N/A	#N/A	#N/A	#N/A	#N/A
2018-03-12 22:00:00	3.4	5.2	1.9	3.9	#N/A	9.5	9.5	2.2	9.6	2.2	#N/A	8	8	1.8	7.5	1.8	#N/A	#N/A	#N/A	#N/A	#N/A	#N/A	#N/A	#N/A
2018-03-12 23:00:00	3.4	5.2	1.3	3.9	#N/A	9.6	9.6	2.2	9.6	2.2	#N/A	7.8	7.8	1.8	7.5	1.8	#N/A	#N/A	#N/A	#N/A	#N/A	#N/A	#N/A	#N/A
2018-03-13	3.2	4.4	1.2	3.4	#N/A	9.5	9.5	2.2	9.6	2.2	#N/A	7.3	7.3	1.8	7.4	1.8	#N/A	#N/A	#N/A	#N/A	#N/A	#N/A	#N/A	#N/A
2018-03-13 01:00:00	2.4	4.4	0.8	3.4	#N/A	9.5	9.5	2.2	9.6	2.2	#N/A	7.2	7.2	1.8	7.4	1.8	#N/A	#N/A	#N/A	#N/A	#N/A	#N/A	#N/A	#N/A
2018-03-13 02:00:00	1.7	4.4	0	3.4	#N/A	9.5	9.5	2.2	9.6	2.2	#N/A	7.1	7.1	1.8	7.4	1.8	#N/A	#N/A	#N/A	#N/A	#N/A	#N/A	#N/A	#N/A
2018-03-13 03:00:00	0.6	4.4	-0.3	3.4	#N/A	9.3	9.3	2.2	9.6	2.2	#N/A	6.9	6.9	1.8	7.4	1.8	#N/A	#N/A	#N/A	#N/A	#N/A	#N/A	#N/A	#N/A
2018-03-13 04:00:00	-0.8	4.4	-0.9	3.4	#N/A	9.1	9.1	2.2	9.6	2.2	#N/A	6.7	6.7	1.8	7.4	1.8	#N/A	#N/A	#N/A	#N/A	#N/A	#N/A	#N/A	#N/A
2018-03-13 05:00:00	-0.4	4.4	-1.4	3.4	#N/A	9.1	9.1	2.2	9.6	2.2	#N/A	6.5	6.5	1.8	7.4	1.8	#N/A	#N/A	#N/A	#N/A	#N/A	#N/A	#N/A	#N/A
2018-03-13 06:00:00	-0.8	4.4	-1.6	3.4	#N/A	9	9	2.2	9.6	2.2	#N/A	6.4	6.4	1.8	7.4	1.8	#N/A	#N/A	#N/A	#N/A	#N/A	#N/A	#N/A	#N/A
2018-03-13 07:00:00	-0.9	4.4	-1.7	3.4	#N/A	8.8	8.8	2.2	9.6	2.2	#N/A	6.2	6.2	1.8	7.4	1.8	#N/A	#N/A	#N/A	#N/A	#N/A	#N/A	#N/A	#N/A
2018-03-13 08:00:00	1.9	4.4	-1.8	3.4	#N/A	8.5	8.5	2.2	9.6	2.2	#N/A	5.9	5.9	1.8	7.4	1.8	#N/A	#N/A	#N/A	#N/A	#N/A	#N/A	#N/A	#N/A
2018-03-13 09:00:00	5.8	4.4	1.1	3.4	#N/A	8.2	8.2	2.2	9.6	2.2	#N/A	5.9	5.9	1.8	7.4	1.8	#N/A	#N/A	#N/A	#N/A	#N/A	#N/A	#N/A	#N/A
2018-03-13 10:00:00	8.7	4.4	6.5	3.4	#N/A	7.8	7.8	2.2	9.6	2.2	#N/A	5.6	5.6	1.8	7.4	1.8	#N/A	#N/A	#N/A	#N/A	#N/A	#N/A	#N/A	#N/A
2018-03-13 11:00:00	9.6	4.4	9.6	3.4	#N/A	8	8	2.2	9.6	2.2	#N/A	5.5	5.5	1.8	7.4	1.8	#N/A	#N/A	#N/A	#N/A	#N/A	#N/A	#N/A	#N/A
2018-03-13 12:00:00	10.4	4.4	10.1	3.4	#N/A	7.9	7.9	2.2	9.6	2.2	#N/A	5.5	5.5	1.8	7.4	1.8	#N/A	#N/A	#N/A	#N/A	#N/A	#N/A	#N/A	#N/A
2018-03-13 13:00:00	10.6	4.4	10.5	3.4	#N/A	7.9	7.9	2.2	9.6	2.2	#N/A	5.5	5.5	1.8	7.4	1.8	#N/A	#N/A	#N/A	#N/A	#N/A	#N/A	#N/A	#N/A
2018-03-13 14:00:00	10.8	4.4	11.3	3.4	#N/A	8.7	8.7	2.2	9.6	2.2	#N/A	5.4	5.4	1.8	7.4	1.8	#N/A	#N/A	#N/A	#N/A	#N/A	#N/A	#N/A	#N/A
2018-03-13 15:00:00	10.3	4.4	10.2	3.4	#N/A	9.9	9.9	2.2	9.6	2.2	#N/A	6.5	6.5	1.8	7.4	1.8	#N/A	#N/A	#N/A	#N/A	#N/A	#N/A	#N/A	#N/A
2018-03-13 16:00:00	11.4	4.4	9.6	3.4	#N/A	10.8	10.8	2.2	9.6	2.2	#N/A	8.5	8.5	1.8	7.4	1.8	#N/A	#N/A	#N/A	#N/A	#N/A	#N/A	#N/A	#N/A
2018-03-13 17:00:00	10.4	4.4	8.9	3.4	#N/A	11.1	11.1	2.2	9.6	2.2	#N/A	9.6	9.6	1.8	7.4	1.8	#N/A	#N/A	#N/A	#N/A	#N/A	#N/A	#N/A	#N/A
2018-03-13 18:00:00	5.1	4.4	5.8	3.4	#N/A	11.3	11.3	2.2	9.6	2.2	#N/A	9.8	9.8	1.8	7.4	1.8	#N/A	#N/A	#N/A	#N/A	#N/A	#N/A	#N/A	#N/A
2018-03-13 19:00:00	3.3	4.4	3.2	3.4	#N/A	11.4	11.4	2.2	9.6	2.2	#N/A	9.9	9.9	1.8	7.4	1.8	#N/A	#N/A	#N/A	#N/A	#N/A	#N/A	#N/A	#N/A
2018-03-13 20:00:00	1.5	4.4	1.5	3.4	#N/A	11.4	11.4	2.2	9.6	2.2	#N/A	10.2	10.2	1.8	7.4	1.8	#N/A	#N/A	#N/A	#N/A	#N/A	#N/A	#N/A	#N/A
2018-03-13 21:00:00	0.4	4.4	0.4	3.4	#N/A	11.3	11.3	2.2	9.6	2.2	#N/A	9.8	9.8	1.8	7.4	1.8	#N/A	#N/A	#N/A	#N/A	#N/A	#N/A	#N/A	#N/A
2018-03-13 22:00:00	-0.2	4.4	-0.5	3.4	#N/A	11.6	11.6	2.2	9.6	2.2	#N/A	9.6	9.6	1.8	7.4	1.8	#N/A	#N/A	#N/A	#N/A	#N/A	#N/A	#N/A	#N/A
2018-03-13 23:00:00	-0.3	4.4	-1.1	3.4	#N/A	11.3	11.3	2.2	9.6	2.2	#N/A	9.3	9.3	1.8	7.4	1.8	#N/A	#N/A	#N/A	#N/A	#N/A	#N/A	#N/A	#N/A
2018-03-14	-1.6	4.9	-1.2	4.5	#N/A	9.7	9.7	2.2	9.5	2.2	#N/A	8.2	8.2	1.8	7.6	1.8	#N/A	#N/A	#N/A	#N/A	#N/A	#N/A	#N/A	#N/A
2018-03-14 01:00:00	-1.8	4.9	-1.6	4.5	#N/A	9.1	9.1	2.2	9.5	2.2	#N/A	7.2	7.2	1.8	7.6	1.8	#N/A	#N/A	#N/A	#N/A	#N/A	#N/A	#N/A	#N/A
2018-03-14 02:00:00	-1.9	4.9	-2.1	4.5	#N/A	8.6	8.6	2.2	9.5	2.2	#N/A	6.6	6.6	1.8	7.6	1.8	#N/A	#N/A	#N/A	#N/A	#N/A	#N/A	#N/A	#N/A
2018-03-14 03:00:00	-1.8	4.9	-2.4	4.5	#N/A	8.2	8.2	2.2	9.5	2.2	#N/A	6.2	6.2	1.8	7.6	1.8	#N/A	#N/A	#N/A	#N/A	#N/A	#N/A	#N/A	#N/A
2018-03-14 04:00:00	-1.9	4.9	-2.7	4.5	#N/A	8	8	2.2	9.5	2.2	#N/A	5.8	5.8	1.8	7.6	1.8	#N/A	#N/A	#N/A	#N/A	#N/A	#N/A	#N/A	#N/A
2018-03-14 05:00:00	-2.4	4.9	-2.8	4.5	#N/A	7.9	7.9	2.2	9.5	2.2	#N/A	5.6	5.6	1.8	7.6	1.8	#N/A	#N/A	#N/A	#N/A	#N/A	#N/A	#N/A	#N/A
2018-03-14 06:00:00	-2.7	4.9	-2.7	4.5	#N/A	7.5	7.5	2.2	9.5	2.2	#N/A	5.6	5.6	1.8	7.6	1.8	#N/A	#N/A	#N/A	#N/A	#N/A	#N/A	#N/A	#N/A
2018-03-14 07:00:00	-2.5	4.9	-2.3	4.5	#N/A	7.5	7.5	2.2	9.5	2.2	#N/A	5.4	5.4	1.8	7.6	1.8	#N/A	#N/A	#N/A	#N/A	#N/A	#N/A	#N/A	#N/A
2018-03-14 08:00:00	3.8	4.9	-0.7	4.5	#N/A	7.4	7.4	2.2	9.5	2.2	#N/A	5.2	5.2	1.8	7.6	1.8	#N/A	#N/A	#N/A	#N/A	#N/A	#N/A	#N/A	#N/A
2018-03-14 09:00:00	8.3	4.9	4	4.5	#N/A	7.5	7.5	2.2	9.5	2.2	#N/A	5.2	5.2	1.8	7.6	1.8	#N/A	#N/A	#N/A	#N/A	#N/A	#N/A	#N/A	#N/A
2018-03-14 10:00:00	10.8	4.9	10.2	4.5	#N/A	7.5	7.5	2.2	9.5	2.2	#N/A	5.1	5.1	1.8	7.6	1.8	#N/A	#N/A	#N/A	#N/A	#N/A	#N/A	#N/A	#N/A
2018-03-14 11:00:00	12.5	4.9	11.7	4.5	#N/A	7.4	7.4	2.2	9.5	2.2	#N/A	5.1	5.1	1.8	7.6	1.8	#N/A	#N/A	#N/A	#N/A	#N/A	#N/A	#N/A	#N/A
2018-03-14 12:00:00	13.4	4.9	13.5	4.5	#N/A	7.4	7.4	2.2	9.5	2.2	#N/A	5.2	5.2	1.8	7.6	1.8	#N/A	#N/A	#N/A	#N/A	#N/A	#N/A	#N/A	#N/A
2018-03-14 13:00:00	13.7	4.9	14.6	4.5	#N/A	7.5	7.5	2.2	9.5	2.2	#N/A	5.4	5.4	1.8	7.6	1.8	#N/A	#N/A	#N/A	#N/A	#N/A	#N/A	#N/A	#N/A
2018-03-14 14:00:00	13.4	4.9	14.3	4.5	#N/A	9.4	9.4	2.2	9.5	2.2	#N/A	5.9	5.9	1.8	7.6	1.8	#N/A	#N/A	#N/A	#N/A	#N/A	#N/A	#N/A	#N/A
2018-03-14 15:00:00	13.8	4.9	14.1	4.5	#N/A	10.7	10.7	2.2	9.5	2.2	#N/A	7.7	7.7	1.8	7.6	1.8	#N/A	#N/A	#N/A	#N/A	#N/A	#N/A	#N/A	#N/A
2018-03-14 16:00:00	12.6	4.9	12.3	4.5	#N/A	11.5	11.5	2.2	9.5	2.2	#N/A	10	10	1.8	7.6	1.8	#N/A	#N/A	#N/A	#N/A	#N/A	#N/A	#N/A	#N/A
2018-03-14 17:00:00	10.5	4.9	9.6	4.5	#N/A	12.1	12.1	2.2	9.5	2.2	#N/A	10.5	10.5	1.8	7.6	1.8	#N/A	#N/A	#N/A	#N/A	#N/A	#N/A	#N/A	#N/A
2018-03-14 18:00:00	6.9	4.9	7	4.5	#N/A	12.4	12.4	2.2	9.5	2.2	#N/A	11.2	11.2	1.8	7.6	1.8	#N/A	#N/A	#N/A	#N/A	#N/A	#N/A	#N/A	#N/A
2018-03-14 19:00:00	4.9	4.9	4.4	4.5	#N/A	12.5	12.5	2.2	9.5	2.2	#N/A	11.6	11.6	1.8	7.6	1.8	#N/A	#N/A	#N/A	#N/A	#N/A	#N/A	#N/A	#N/A
2018-03-14 20:00:00	3.2	4.9	3.6	4.5	#N/A	12.4	12.4	2.2	9.5	2.2	#N/A	11.5	11.5	1.8	7.6	1.8	#N/A	#N/A	#N/A	#N/A	#N/A	#N/A	#N/A	#N/A
2018-03-14 21:00:00	2	4.9	2.6	4.5	#N/A	12.5	12.5	2.2	9.5	2.2	#N/A	11.4	11.4	1.8	7.6	1.8	#N/A	#N/A	#N/A	#N/A	#N/A	#N/A	#N/A	#N/A
2018-03-14 22:00:00	1.7	4.9	2.4	4.5	#N/A	12.2	12.2	2.2	9.5	2.2	#N/A	10.8	10.8	1.8	7.6	1.8	#N/A	#N/A	#N/A	#N/A	#N/A	#N/A	#N/A	#N/A
2018-03-14 23:00:00	3	4.9	3.1	4.5	#N/A	11.6	11.6	2.2	9.5	2.2	#N/A	9.9	9.9	1.8	7.6	1.8	#N/A	#N/A	#N/A	#N/A	#N/A	#N/A	#N/A	#N/A
2018-03-15	7.9	5.7	3.6	3.4	#N/A	10.6	10.6	2.2	10.7	2.2	#N/A	9	9	1.8	8	1.8	#N/A	#N/A	#N/A	#N/A	#N/A	#N/A	#N/A	#N/A
2018-03-15 01:00:00	5.7	5.7	3.6	3.4	#N/A	10	10	2.2	10.7	2.2	#N/A	8.1	8.1	1.8	8	1.8	#N/A	#N/A	#N/A	#N/A	#N/A	#N/A	#N/A	#N/A
2018-03-15 02:00:00	4.7	5.7	3.3	3.4	#N/A	9.6	9.6	2.2	10.7	2.2	#N/A	7.8	7.8	1.8	8	1.8	#N/A	#N/A	#N/A	#N/A	#N/A	#N/A	#N/A	#N/A
2018-03-15 03:00:00	5.7	5.7	2.7	3.4	#N/A	9.3	9.3	2.2	10.7	2.2	#N/A	7.5	7.5	1.8	8	1.8	#N/A	#N/A	#N/A	#N/A	#N/A	#N/A	#N/A	#N/A
2018-03-15 04:00:00	6.2	5.7	3.2	3.4	#N/A	9.2	9.2	2.2	10.7	2.2	#N/A	7.4	7.4	1.8	8	1.8	#N/A	#N/A	#N/A	#N/A	#N/A	#N/A	#N/A	#N/A
2018-03-15 05:00:00	7.6	5.7	3.3	3.4	#N/A	9.7	9.7	2.2	10.7	2.2	#N/A	7.7	7.7	1.8	8	1.8	#N/A	#N/A	#N/A	#N/A	#N/A	#N/A	#N/A	#N/A
2018-03-15 06:00:00	8.2	5.7	3.3	3.4	#N/A	11.2	11.2	2.2	10.7	2.2	#N/A	7.9	7.9	1.8	8	1.8	#N/A	#N/A	#N/A	#N/A	#N/A	#N/A	#N/A	#N/A
2018-03-15 07:00:00	8.3	5.7	3.7	3.4	#N/A	10.6	10.6	2.2	10.7	2.2	#N/A	8	8	1.8	8	1.8	#N/A	#N/A	#N/A	#N/A	#N/A	#N/A	#N/A	#N/A
2018-03-15 08:00:00	8.6	5.7	4	3.4	#N/A	10.4	10.4	2.2	10.7	2.2	#N/A	7.9	7.9	1.8	8	1.8	#N/A	#N/A	#N/A	#N/A	#N/A	#N/A	#N/A	#N/A
2018-03-15 09:00:00	7.4	5.7	4.1	3.4	#N/A	10.7	10.7	2.2	10.7	2.2	#N/A	7.7	7.7	1.8	8	1.8	#N/A	#N/A	#N/A	#N/A	#N/A	#N/A	#N/A	#N/A
2018-03-15 10:00:00	6.7	5.7	4.1	3.4	#N/A	10.8	10.8	2.2	10.7	2.2	#N/A	7.9	7.9	1.8	8	1.8	#N/A	#N/A	#N/A	#N/A	#N/A	#N/A	#N/A	#N/A
2018-03-15 11:00:00	6.8	5.7	4.2	3.4	#N/A	11.3	11.3	2.2	10.7	2.2	#N/A	7.9	7.9	1.8	8	1.8	#N/A	#N/A	#N/A	#N/A	#N/A	#N/A	#N/A	#N/A
2018-03-15 12:00:00	6.9	5.7	4.4	3.4	#N/A	11.4	11.4	2.2	10.7	2.2	#N/A	7.9	7.9	1.8	8	1.8	#N/A	#N/A	#N/A	#N/A	#N/A	#N/A	#N/A	#N/A
2018-03-15 13:00:00	5.2	5.7	4.4	3.4	#N/A	11.4	11.4	2.2	10.7	2.2	#N/A	8	8	1.8	8	1.8	#N/A	#N/A	#N/A	#N/A	#N/A	#N/A	#N/A	#N/A
2018-03-15 14:00:00	5.5	5.7	3.8	3.4	#N/A	11.5	11.5	2.2	10.7	2.2	#N/A	8	8	1.8	8	1.8	#N/A	#N/A	#N/A	#N/A	#N/A	#N/A	#N/A	#N/A
2018-03-15 15:00:00	6.9	5.7	4.6	3.4	#N/A	11.1	11.1	2.2	10.7	2.2	#N/A	8	8	1.8	8	1.8	#N/A	#N/A	#N/A	#N/A	#N/A	#N/A	#N/A	#N/A
2018-03-15 16:00:00	8.2	5.7	6.7	3.4	#N/A	10.9	10.9	2.2	10.7	2.2	#N/A	8	8	1.8	8	1.8	#N/A	#N/A	#N/A	#N/A	#N/A	#N/A	#N/A	#N/A
2018-03-15 17:00:00	6.7	5.7	6.1	3.4	#N/A	10.9	10.9	2.2	10.7	2.2	#N/A	8.1	8.1	1.8	8	1.8	#N/A	#N/A	#N/A	#N/A	#N/A	#N/A	#N/A	#N/A
2018-03-15 18:00:00	5.2	5.7	4.7	3.4	#N/A	10.9	10.9	2.2	10.7	2.2	#N/A	8.1	8.1	1.8	8	1.8	#N/A	#N/A	#N/A	#N/A	#N/A	#N/A	#N/A	#N/A
2018-03-15 19:00:00	3.6	5.7	2.8	3.4	#N/A	10.4	10.4	2.2	10.7	2.2	#N/A	8.2	8.2	1.8	8	1.8	#N/A	#N/A	#N/A	#N/A	#N/A	#N/A	#N/A	#N/A
2018-03-15 20:00:00	2.3	5.7	1.6	3.4	#N/A	10.5	10.5	2.2	10.7	2.2	#N/A	7.9	7.9	1.8	8	1.8	#N/A	#N/A	#N/A	#N/A	#N/A	#N/A	#N/A	#N/A
2018-03-15 21:00:00	0.9	5.7	0.4	3.4	#N/A	10.9	10.9	2.2	10.7	2.2	#N/A	8.2	8.2	1.8	8	1.8	#N/A	#N/A	#N/A	#N/A	#N/A	#N/A	#N/A	#N/A
2018-03-15 22:00:00	0.4	5.7	0.1	3.4	#N/A	11.3	11.3	2.2	10.7	2.2	#N/A	9	9	1.8	8	1.8	#N/A	#N/A	#N/A	#N/A	#N/A	#N/A	#N/A	#N/A
2018-03-15 23:00:00	0.2	5.7	-0.2	3.4	#N/A	10.9	10.9	2.2	10.7	2.2	#N/A	8.8	8.8	1.8	8	1.8	#N/A	#N/A	#N/A	#N/A	#N/A	#N/A	#N/A	#N/A
2018-03-16	0.5	5.5	0.7	4.6	#N/A	10.5	10.5	2.2	10.4	2.2	#N/A	8.3	8.3	1.8	8	1.8	#N/A	#N/A	#N/A	#N/A	#N/A	#N/A	#N/A	#N/A
2018-03-16 01:00:00	-0.3	5.5	0.1	4.6	#N/A	10	10	2.2	10.4	2.2	#N/A	7.6	7.6	1.8	8	1.8	#N/A	#N/A	#N/A	#N/A	#N/A	#N/A	#N/A	#N/A
2018-03-16 02:00:00	-0.5	5.5	-0.3	4.6	#N/A	9.7	9.7	2.2	10.4	2.2	#N/A	7.1	7.1	1.8	8	1.8	#N/A	#N/A	#N/A	#N/A	#N/A	#N/A	#N/A	#N/A
2018-03-16 03:00:00	-0.6	5.5	-0.5	4.6	#N/A	9.3	9.3	2.2	10.4	2.2	#N/A	6.7	6.7	1.8	8	1.8	#N/A	#N/A	#N/A	#N/A	#N/A	#N/A	#N/A	#N/A
2018-03-16 04:00:00	-0.6	5.5	-0.3	4.6	#N/A	9.1	9.1	2.2	10.4	2.2	#N/A	6.6	6.6	1.8	8	1.8	#N/A	#N/A	#N/A	#N/A	#N/A	#N/A	#N/A	#N/A
2018-03-16 05:00:00	-0.3	5.5	-0.4	4.6	#N/A	9.1	9.1	2.2	10.4	2.2	#N/A	6.5	6.5	1.8	8	1.8	#N/A	#N/A	#N/A	#N/A	#N/A	#N/A	#N/A	#N/A
2018-03-16 06:00:00	-0.8	5.5	-0.7	4.6	#N/A	9.2	9.2	2.2	10.4	2.2	#N/A	6.8	6.8	1.8	8	1.8	#N/A	#N/A	#N/A	#N/A	#N/A	#N/A	#N/A	#N/A
2018-03-16 07:00:00	-0.6	5.5	-0.5	4.6	#N/A	9	9	2.2	10.4	2.2	#N/A	6.6	6.6	1.8	8	1.8	#N/A	#N/A	#N/A	#N/A	#N/A	#N/A	#N/A	#N/A
2018-03-16 08:00:00	4	5.5	-0.3	4.6	#N/A	8.9	8.9	2.2	10.4	2.2	#N/A	6.5	6.5	1.8	8	1.8	#N/A	#N/A	#N/A	#N/A	#N/A	#N/A	#N/A	#N/A
2018-03-16 09:00:00	7.2	5.5	3.1	4.6	#N/A	8.9	8.9	2.2	10.4	2.2	#N/A	6.4	6.4	1.8	8	1.8	#N/A	#N/A	#N/A	#N/A	#N/A	#N/A	#N/A	#N/A
2018-03-16 10:00:00	10.1	5.5	8.5	4.6	#N/A	8.9	8.9	2.2	10.4	2.2	#N/A	6.5	6.5	1.8	8	1.8	#N/A	#N/A	#N/A	#N/A	#N/A	#N/A	#N/A	#N/A
2018-03-16 11:00:00	12.1	5.5	11.6	4.6	#N/A	9	9	2.2	10.4	2.2	#N/A	6.5	6.5	1.8	8	1.8	#N/A	#N/A	#N/A	#N/A	#N/A	#N/A	#N/A	#N/A
2018-03-16 12:00:00	12	5.5	12.4	4.6	#N/A	8.8	8.8	2.2	10.4	2.2	#N/A	6.3	6.3	1.8	8	1.8	#N/A	#N/A	#N/A	#N/A	#N/A	#N/A	#N/A	#N/A
2018-03-16 13:00:00	13.2	5.5	12.2	4.6	#N/A	8.9	8.9	2.2	10.4	2.2	#N/A	6.4	6.4	1.8	8	1.8	#N/A	#N/A	#N/A	#N/A	#N/A	#N/A	#N/A	#N/A
2018-03-16 14:00:00	12.6	5.5	10.3	4.6	#N/A	10.2	10.2	2.2	10.4	2.2	#N/A	6.5	6.5	1.8	8	1.8	#N/A	#N/A	#N/A	#N/A	#N/A	#N/A	#N/A	#N/A
2018-03-16 15:00:00	11.7	5.5	10.7	4.6	#N/A	11.2	11.2	2.2	10.4	2.2	#N/A	7.7	7.7	1.8	8	1.8	#N/A	#N/A	#N/A	#N/A	#N/A	#N/A	#N/A	#N/A
2018-03-16 16:00:00	10.5	5.5	9.3	4.6	#N/A	12	12	2.2	10.4	2.2	#N/A	9.6	9.6	1.8	8	1.8	#N/A	#N/A	#N/A	#N/A	#N/A	#N/A	#N/A	#N/A
2018-03-16 17:00:00	8.7	5.5	7.6	4.6	#N/A	12.6	12.6	2.2	10.4	2.2	#N/A	10.7	10.7	1.8	8	1.8	#N/A	#N/A	#N/A	#N/A	#N/A	#N/A	#N/A	#N/A
2018-03-16 18:00:00	7	5.5	5.9	4.6	#N/A	12.6	12.6	2.2	10.4	2.2	#N/A	11	11	1.8	8	1.8	#N/A	#N/A	#N/A	#N/A	#N/A	#N/A	#N/A	#N/A
2018-03-16 19:00:00	6.2	5.5	4.9	4.6	#N/A	13	13	2.2	10.4	2.2	#N/A	10.9	10.9	1.8	8	1.8	#N/A	#N/A	#N/A	#N/A	#N/A	#N/A	#N/A	#N/A
2018-03-16 20:00:00	5.7	5.5	4.6	4.6	#N/A	12.8	12.8	2.2	10.4	2.2	#N/A	10.2	10.2	1.8	8	1.8	#N/A	#N/A	#N/A	#N/A	#N/A	#N/A	#N/A	#N/A
2018-03-16 21:00:00	5	5.5	4.5	4.6	#N/A	12.5	12.5	2.2	10.4	2.2	#N/A	10.4	10.4	1.8	8	1.8	#N/A	#N/A	#N/A	#N/A	#N/A	#N/A	#N/A	#N/A
2018-03-16 22:00:00	5.1	5.5	4	4.6	#N/A	12.1	12.1	2.2	10.4	2.2	#N/A	9.9	9.9	1.8	8	1.8	#N/A	#N/A	#N/A	#N/A	#N/A	#N/A	#N/A	#N/A
2018-03-16 23:00:00	4.1	5.5	2.9	4.6	#N/A	11.6	11.6	2.2	10.4	2.2	#N/A	9.2	9.2	1.8	8	1.8	#N/A	#N/A	#N/A	#N/A	#N/A	#N/A	#N/A	#N/A
2018-03-17	3.7	2.1	2.3	1.1	#N/A	11.1	11.1	2.2	9.5	2.2	#N/A	8.6	8.6	1.8	6.9	1.8	#N/A	#N/A	#N/A	#N/A	#N/A	#N/A	#N/A	#N/A
2018-03-17 01:00:00	2.9	2.1	2.1	1.1	#N/A	10.8	10.8	2.2	9.5	2.2	#N/A	8.2	8.2	1.8	6.9	1.8	#N/A	#N/A	#N/A	#N/A	#N/A	#N/A	#N/A	#N/A
2018-03-17 02:00:00	2.8	2.1	1.8	1.1	#N/A	10.6	10.6	2.2	9.5	2.2	#N/A	8.1	8.1	1.8	6.9	1.8	#N/A	#N/A	#N/A	#N/A	#N/A	#N/A	#N/A	#N/A
2018-03-17 03:00:00	1.1	2.1	0	1.1	#N/A	10.4	10.4	2.2	9.5	2.2	#N/A	8.1	8.1	1.8	6.9	1.8	#N/A	#N/A	#N/A	#N/A	#N/A	#N/A	#N/A	#N/A
2018-03-17 04:00:00	0.1	2.1	-0.4	1.1	#N/A	10.3	10.3	2.2	9.5	2.2	#N/A	7.8	7.8	1.8	6.9	1.8	#N/A	#N/A	#N/A	#N/A	#N/A	#N/A	#N/A	#N/A
2018-03-17 05:00:00	0.2	2.1	-0.2	1.1	#N/A	10	10	2.2	9.5	2.2	#N/A	7.4	7.4	1.8	6.9	1.8	#N/A	#N/A	#N/A	#N/A	#N/A	#N/A	#N/A	#N/A
2018-03-17 06:00:00	0.1	2.1	-1.1	1.1	#N/A	9.8	9.8	2.2	9.5	2.2	#N/A	7.2	7.2	1.8	6.9	1.8	#N/A	#N/A	#N/A	#N/A	#N/A	#N/A	#N/A	#N/A
2018-03-17 07:00:00	0.5	2.1	-0.2	1.1	#N/A	9.5	9.5	2.2	9.5	2.2	#N/A	7	7	1.8	6.9	1.8	#N/A	#N/A	#N/A	#N/A	#N/A	#N/A	#N/A	#N/A
2018-03-17 08:00:00	1	2.1	0.2	1.1	#N/A	9.5	9.5	2.2	9.5	2.2	#N/A	6.9	6.9	1.8	6.9	1.8	#N/A	#N/A	#N/A	#N/A	#N/A	#N/A	#N/A	#N/A
2018-03-17 09:00:00	1.4	2.1	0.3	1.1	#N/A	8.9	8.9	2.2	9.5	2.2	#N/A	6.2	6.2	1.8	6.9	1.8	#N/A	#N/A	#N/A	#N/A	#N/A	#N/A	#N/A	#N/A
2018-03-17 10:00:00	1.6	2.1	0.2	1.1	#N/A	8.5	8.5	2.2	9.5	2.2	#N/A	6	6	1.8	6.9	1.8	#N/A	#N/A	#N/A	#N/A	#N/A	#N/A	#N/A	#N/A
2018-03-17 11:00:00	2	2.1	0.5	1.1	#N/A	8.5	8.5	2.2	9.5	2.2	#N/A	6.1	6.1	1.8	6.9	1.8	#N/A	#N/A	#N/A	#N/A	#N/A	#N/A	#N/A	#N/A
2018-03-17 12:00:00	3.3	2.1	1.3	1.1	#N/A	8.5	8.5	2.2	9.5	2.2	#N/A	5.7	5.7	1.8	6.9	1.8	#N/A	#N/A	#N/A	#N/A	#N/A	#N/A	#N/A	#N/A
2018-03-17 13:00:00	4.6	2.1	2.3	1.1	#N/A	8.6	8.6	2.2	9.5	2.2	#N/A	6	6	1.8	6.9	1.8	#N/A	#N/A	#N/A	#N/A	#N/A	#N/A	#N/A	#N/A
2018-03-17 14:00:00	4.8	2.1	3.5	1.1	#N/A	8.7	8.7	2.2	9.5	2.2	#N/A	6.1	6.1	1.8	6.9	1.8	#N/A	#N/A	#N/A	#N/A	#N/A	#N/A	#N/A	#N/A
2018-03-17 15:00:00	5.6	2.1	4.1	1.1	#N/A	8.7	8.7	2.2	9.5	2.2	#N/A	6.1	6.1	1.8	6.9	1.8	#N/A	#N/A	#N/A	#N/A	#N/A	#N/A	#N/A	#N/A
2018-03-17 16:00:00	5.3	2.1	4.1	1.1	#N/A	8.8	8.8	2.2	9.5	2.2	#N/A	6.1	6.1	1.8	6.9	1.8	#N/A	#N/A	#N/A	#N/A	#N/A	#N/A	#N/A	#N/A
2018-03-17 17:00:00	5.9	2.1	4.2	1.1	#N/A	8.8	8.8	2.2	9.5	2.2	#N/A	6.2	6.2	1.8	6.9	1.8	#N/A	#N/A	#N/A	#N/A	#N/A	#N/A	#N/A	#N/A
2018-03-17 18:00:00	3.9	2.1	3.4	1.1	#N/A	9.2	9.2	2.2	9.5	2.2	#N/A	6.4	6.4	1.8	6.9	1.8	#N/A	#N/A	#N/A	#N/A	#N/A	#N/A	#N/A	#N/A
2018-03-17 19:00:00	1.9	2.1	0.8	1.1	#N/A	9.5	9.5	2.2	9.5	2.2	#N/A	6.7	6.7	1.8	6.9	1.8	#N/A	#N/A	#N/A	#N/A	#N/A	#N/A	#N/A	#N/A
2018-03-17 20:00:00	0.4	2.1	0	1.1	#N/A	9.5	9.5	2.2	9.5	2.2	#N/A	7.1	7.1	1.8	6.9	1.8	#N/A	#N/A	#N/A	#N/A	#N/A	#N/A	#N/A	#N/A
2018-03-17 21:00:00	-0.5	2.1	-0.7	1.1	#N/A	9.7	9.7	2.2	9.5	2.2	#N/A	7.3	7.3	1.8	6.9	1.8	#N/A	#N/A	#N/A	#N/A	#N/A	#N/A	#N/A	#N/A
2018-03-17 22:00:00	-1.3	2.1	-0.8	1.1	#N/A	9.5	9.5	2.2	9.5	2.2	#N/A	7.3	7.3	1.8	6.9	1.8	#N/A	#N/A	#N/A	#N/A	#N/A	#N/A	#N/A	#N/A
2018-03-17 23:00:00	-0.6	2.1	-1.1	1.1	#N/A	9.6	9.6	2.2	9.5	2.2	#N/A	7.2	7.2	1.8	6.9	1.8	#N/A	#N/A	#N/A	#N/A	#N/A	#N/A	#N/A	#N/A
2018-03-18	-1.2	1.7	-1.3	0.2	#N/A	8.9	8.9	2.2	7.6	2.2	#N/A	6.9	6.9	1.8	5.4	1.8	#N/A	#N/A	#N/A	#N/A	#N/A	#N/A	#N/A	#N/A
2018-03-18 01:00:00	-1.3	1.7	-2.1	0.2	#N/A	8.3	8.3	2.2	7.6	2.2	#N/A	5.9	5.9	1.8	5.4	1.8	#N/A	#N/A	#N/A	#N/A	#N/A	#N/A	#N/A	#N/A
2018-03-18 02:00:00	-1.1	1.7	-2.2	0.2	#N/A	7.7	7.7	2.2	7.6	2.2	#N/A	5.6	5.6	1.8	5.4	1.8	#N/A	#N/A	#N/A	#N/A	#N/A	#N/A	#N/A	#N/A
2018-03-18 03:00:00	-1.1	1.7	-2	0.2	#N/A	7.4	7.4	2.2	7.6	2.2	#N/A	5.3	5.3	1.8	5.4	1.8	#N/A	#N/A	#N/A	#N/A	#N/A	#N/A	#N/A	#N/A
2018-03-18 04:00:00	-1.3	1.7	-2.4	0.2	#N/A	7.1	7.1	2.2	7.6	2.2	#N/A	5.2	5.2	1.8	5.4	1.8	#N/A	#N/A	#N/A	#N/A	#N/A	#N/A	#N/A	#N/A
2018-03-18 05:00:00	-1.1	1.7	-2.4	0.2	#N/A	7.2	7.2	2.2	7.6	2.2	#N/A	5.1	5.1	1.8	5.4	1.8	#N/A	#N/A	#N/A	#N/A	#N/A	#N/A	#N/A	#N/A
2018-03-18 06:00:00	-1.1	1.7	-2	0.2	#N/A	7	7	2.2	7.6	2.2	#N/A	5	5	1.8	5.4	1.8	#N/A	#N/A	#N/A	#N/A	#N/A	#N/A	#N/A	#N/A
2018-03-18 07:00:00	-0.2	1.7	-1.7	0.2	#N/A	6.9	6.9	2.2	7.6	2.2	#N/A	4.6	4.6	1.8	5.4	1.8	#N/A	#N/A	#N/A	#N/A	#N/A	#N/A	#N/A	#N/A
2018-03-18 08:00:00	0.9	1.7	-0.8	0.2	#N/A	6.9	6.9	2.2	7.6	2.2	#N/A	4.6	4.6	1.8	5.4	1.8	#N/A	#N/A	#N/A	#N/A	#N/A	#N/A	#N/A	#N/A
2018-03-18 09:00:00	2.1	1.7	0.3	0.2	#N/A	6.9	6.9	2.2	7.6	2.2	#N/A	4.6	4.6	1.8	5.4	1.8	#N/A	#N/A	#N/A	#N/A	#N/A	#N/A	#N/A	#N/A
2018-03-18 10:00:00	3.8	1.7	1.5	0.2	#N/A	6.8	6.8	2.2	7.6	2.2	#N/A	4.4	4.4	1.8	5.4	1.8	#N/A	#N/A	#N/A	#N/A	#N/A	#N/A	#N/A	#N/A
2018-03-18 11:00:00	4.6	1.7	2	0.2	#N/A	6.8	6.8	2.2	7.6	2.2	#N/A	4.4	4.4	1.8	5.4	1.8	#N/A	#N/A	#N/A	#N/A	#N/A	#N/A	#N/A	#N/A
2018-03-18 12:00:00	5.2	1.7	2.9	0.2	#N/A	6.8	6.8	2.2	7.6	2.2	#N/A	4.5	4.5	1.8	5.4	1.8	#N/A	#N/A	#N/A	#N/A	#N/A	#N/A	#N/A	#N/A
2018-03-18 13:00:00	4.2	1.7	3	0.2	#N/A	7.1	7.1	2.2	7.6	2.2	#N/A	4.7	4.7	1.8	5.4	1.8	#N/A	#N/A	#N/A	#N/A	#N/A	#N/A	#N/A	#N/A
2018-03-18 14:00:00	4.1	1.7	2.4	0.2	#N/A	7.4	7.4	2.2	7.6	2.2	#N/A	4.9	4.9	1.8	5.4	1.8	#N/A	#N/A	#N/A	#N/A	#N/A	#N/A	#N/A	#N/A
2018-03-18 15:00:00	3.6	1.7	2.5	0.2	#N/A	7.7	7.7	2.2	7.6	2.2	#N/A	5.3	5.3	1.8	5.4	1.8	#N/A	#N/A	#N/A	#N/A	#N/A	#N/A	#N/A	#N/A
2018-03-18 16:00:00	3.6	1.7	2.4	0.2	#N/A	8.2	8.2	2.2	7.6	2.2	#N/A	5.7	5.7	1.8	5.4	1.8	#N/A	#N/A	#N/A	#N/A	#N/A	#N/A	#N/A	#N/A
2018-03-18 17:00:00	3.7	1.7	2.4	0.2	#N/A	8.4	8.4	2.2	7.6	2.2	#N/A	5.9	5.9	1.8	5.4	1.8	#N/A	#N/A	#N/A	#N/A	#N/A	#N/A	#N/A	#N/A
2018-03-18 18:00:00	2.8	1.7	1.7	0.2	#N/A	8.6	8.6	2.2	7.6	2.2	#N/A	6.2	6.2	1.8	5.4	1.8	#N/A	#N/A	#N/A	#N/A	#N/A	#N/A	#N/A	#N/A
2018-03-18 19:00:00	1.8	1.7	0.5	0.2	#N/A	8.2	8.2	2.2	7.6	2.2	#N/A	6.2	6.2	1.8	5.4	1.8	#N/A	#N/A	#N/A	#N/A	#N/A	#N/A	#N/A	#N/A
2018-03-18 20:00:00	1.3	1.7	0.1	0.2	#N/A	8.2	8.2	2.2	7.6	2.2	#N/A	5.9	5.9	1.8	5.4	1.8	#N/A	#N/A	#N/A	#N/A	#N/A	#N/A	#N/A	#N/A
2018-03-18 21:00:00	1.5	1.7	0.2	0.2	#N/A	8	8	2.2	7.6	2.2	#N/A	6	6	1.8	5.4	1.8	#N/A	#N/A	#N/A	#N/A	#N/A	#N/A	#N/A	#N/A
2018-03-18 22:00:00	2	1.7	0	0.2	#N/A	8	8	2.2	7.6	2.2	#N/A	5.9	5.9	1.8	5.4	1.8	#N/A	#N/A	#N/A	#N/A	#N/A	#N/A	#N/A	#N/A
2018-03-18 23:00:00	2.9	1.7	-0.3	0.2	#N/A	8	8	2.2	7.6	2.2	#N/A	5.9	5.9	1.8	5.4	1.8	#N/A	#N/A	#N/A	#N/A	#N/A	#N/A	#N/A	#N/A
2018-03-19	1	3.3	-0.8	1.9	#N/A	7.7	7.7	2.2	8	2.2	#N/A	5.6	5.6	1.8	5.6	1.8	#N/A	#N/A	#N/A	#N/A	#N/A	#N/A	#N/A	#N/A
2018-03-19 01:00:00	-0.2	3.3	-1.4	1.9	#N/A	7.4	7.4	2.2	8	2.2	#N/A	5.1	5.1	1.8	5.6	1.8	#N/A	#N/A	#N/A	#N/A	#N/A	#N/A	#N/A	#N/A
2018-03-19 02:00:00	-1	3.3	-2.2	1.9	#N/A	7.2	7.2	2.2	8	2.2	#N/A	5	5	1.8	5.6	1.8	#N/A	#N/A	#N/A	#N/A	#N/A	#N/A	#N/A	#N/A
2018-03-19 03:00:00	-1.9	3.3	-2.7	1.9	#N/A	7.3	7.3	2.2	8	2.2	#N/A	5	5	1.8	5.6	1.8	#N/A	#N/A	#N/A	#N/A	#N/A	#N/A	#N/A	#N/A
2018-03-19 04:00:00	1.7	3.3	-3.2	1.9	#N/A	7.4	7.4	2.2	8	2.2	#N/A	4.9	4.9	1.8	5.6	1.8	#N/A	#N/A	#N/A	#N/A	#N/A	#N/A	#N/A	#N/A
2018-03-19 05:00:00	0.2	3.3	-3.5	1.9	#N/A	7.6	7.6	2.2	8	2.2	#N/A	4.7	4.7	1.8	5.6	1.8	#N/A	#N/A	#N/A	#N/A	#N/A	#N/A	#N/A	#N/A
2018-03-19 06:00:00	0.6	3.3	-3.5	1.9	#N/A	7	7	2.2	8	2.2	#N/A	4.5	4.5	1.8	5.6	1.8	#N/A	#N/A	#N/A	#N/A	#N/A	#N/A	#N/A	#N/A
2018-03-19 07:00:00	0	3.3	-3.5	1.9	#N/A	6.7	6.7	2.2	8	2.2	#N/A	4.2	4.2	1.8	5.6	1.8	#N/A	#N/A	#N/A	#N/A	#N/A	#N/A	#N/A	#N/A
2018-03-19 08:00:00	4.3	3.3	-3	1.9	#N/A	6.4	6.4	2.2	8	2.2	#N/A	4	4	1.8	5.6	1.8	#N/A	#N/A	#N/A	#N/A	#N/A	#N/A	#N/A	#N/A
2018-03-19 09:00:00	6.5	3.3	1.5	1.9	#N/A	6.2	6.2	2.2	8	2.2	#N/A	3.7	3.7	1.8	5.6	1.8	#N/A	#N/A	#N/A	#N/A	#N/A	#N/A	#N/A	#N/A
2018-03-19 10:00:00	7.5	3.3	6.4	1.9	#N/A	7.2	7.2	2.2	8	2.2	#N/A	3.6	3.6	1.8	5.6	1.8	#N/A	#N/A	#N/A	#N/A	#N/A	#N/A	#N/A	#N/A
2018-03-19 11:00:00	8.6	3.3	8.2	1.9	#N/A	6.8	6.8	2.2	8	2.2	#N/A	3.5	3.5	1.8	5.6	1.8	#N/A	#N/A	#N/A	#N/A	#N/A	#N/A	#N/A	#N/A
2018-03-19 12:00:00	9.1	3.3	9.9	1.9	#N/A	6.9	6.9	2.2	8	2.2	#N/A	3.5	3.5	1.8	5.6	1.8	#N/A	#N/A	#N/A	#N/A	#N/A	#N/A	#N/A	#N/A
2018-03-19 13:00:00	8.2	3.3	8.7	1.9	#N/A	6.7	6.7	2.2	8	2.2	#N/A	3.5	3.5	1.8	5.6	1.8	#N/A	#N/A	#N/A	#N/A	#N/A	#N/A	#N/A	#N/A
2018-03-19 14:00:00	9.6	3.3	8.4	1.9	#N/A	8.1	8.1	2.2	8	2.2	#N/A	3.7	3.7	1.8	5.6	1.8	#N/A	#N/A	#N/A	#N/A	#N/A	#N/A	#N/A	#N/A
2018-03-19 15:00:00	10.1	3.3	10.4	1.9	#N/A	8.7	8.7	2.2	8	2.2	#N/A	5.3	5.3	1.8	5.6	1.8	#N/A	#N/A	#N/A	#N/A	#N/A	#N/A	#N/A	#N/A
2018-03-19 16:00:00	9.6	3.3	10	1.9	#N/A	9	9	2.2	8	2.2	#N/A	7.1	7.1	1.8	5.6	1.8	#N/A	#N/A	#N/A	#N/A	#N/A	#N/A	#N/A	#N/A
2018-03-19 17:00:00	8.8	3.3	7.8	1.9	#N/A	9.4	9.4	2.2	8	2.2	#N/A	7.8	7.8	1.8	5.6	1.8	#N/A	#N/A	#N/A	#N/A	#N/A	#N/A	#N/A	#N/A
2018-03-19 18:00:00	3.6	3.3	4.6	1.9	#N/A	9.5	9.5	2.2	8	2.2	#N/A	8.4	8.4	1.8	5.6	1.8	#N/A	#N/A	#N/A	#N/A	#N/A	#N/A	#N/A	#N/A
2018-03-19 19:00:00	1.7	3.3	0.9	1.9	#N/A	9.2	9.2	2.2	8	2.2	#N/A	8	8	1.8	5.6	1.8	#N/A	#N/A	#N/A	#N/A	#N/A	#N/A	#N/A	#N/A
2018-03-19 20:00:00	-0.6	3.3	-1.2	1.9	#N/A	9.6	9.6	2.2	8	2.2	#N/A	7.9	7.9	1.8	5.6	1.8	#N/A	#N/A	#N/A	#N/A	#N/A	#N/A	#N/A	#N/A
2018-03-19 21:00:00	-2.2	3.3	-1.8	1.9	#N/A	9.7	9.7	2.2	8	2.2	#N/A	8.6	8.6	1.8	5.6	1.8	#N/A	#N/A	#N/A	#N/A	#N/A	#N/A	#N/A	#N/A
2018-03-19 22:00:00	-2.7	3.3	-2.1	1.9	#N/A	9.5	9.5	2.2	8	2.2	#N/A	8.4	8.4	1.8	5.6	1.8	#N/A	#N/A	#N/A	#N/A	#N/A	#N/A	#N/A	#N/A
2018-03-19 23:00:00	-3	3.3	-2.2	1.9	#N/A	9.3	9.3	2.2	8	2.2	#N/A	7.6	7.6	1.8	5.6	1.8	#N/A	#N/A	#N/A	#N/A	#N/A	#N/A	#N/A	#N/A
2018-03-20	-3.6	2.3	-2.7	1.4	#N/A	7.7	7.7	2.2	7	2.2	#N/A	6.4	6.4	1.8	5.2	1.8	#N/A	#N/A	#N/A	#N/A	#N/A	#N/A	#N/A	#N/A
2018-03-20 01:00:00	-3.8	2.3	-3.4	1.4	#N/A	7.1	7.1	2.2	7	2.2	#N/A	5	5	1.8	5.2	1.8	#N/A	#N/A	#N/A	#N/A	#N/A	#N/A	#N/A	#N/A
2018-03-20 02:00:00	-3.8	2.3	-3.9	1.4	#N/A	6.4	6.4	2.2	7	2.2	#N/A	4.2	4.2	1.8	5.2	1.8	#N/A	#N/A	#N/A	#N/A	#N/A	#N/A	#N/A	#N/A
2018-03-20 03:00:00	-3.9	2.3	-4.2	1.4	#N/A	5.9	5.9	2.2	7	2.2	#N/A	4	4	1.8	5.2	1.8	#N/A	#N/A	#N/A	#N/A	#N/A	#N/A	#N/A	#N/A
2018-03-20 04:00:00	-4	2.3	-4.5	1.4	#N/A	5.7	5.7	2.2	7	2.2	#N/A	3.9	3.9	1.8	5.2	1.8	#N/A	#N/A	#N/A	#N/A	#N/A	#N/A	#N/A	#N/A
2018-03-20 05:00:00	-3.9	2.3	-4.4	1.4	#N/A	5.6	5.6	2.2	7	2.2	#N/A	3.8	3.8	1.8	5.2	1.8	#N/A	#N/A	#N/A	#N/A	#N/A	#N/A	#N/A	#N/A
2018-03-20 06:00:00	-4.2	2.3	-4.7	1.4	#N/A	5.4	5.4	2.2	7	2.2	#N/A	3.6	3.6	1.8	5.2	1.8	#N/A	#N/A	#N/A	#N/A	#N/A	#N/A	#N/A	#N/A
2018-03-20 07:00:00	-4	2.3	-4.6	1.4	#N/A	5.3	5.3	2.2	7	2.2	#N/A	3.4	3.4	1.8	5.2	1.8	#N/A	#N/A	#N/A	#N/A	#N/A	#N/A	#N/A	#N/A
2018-03-20 08:00:00	3.3	2.3	-3.9	1.4	#N/A	5.3	5.3	2.2	7	2.2	#N/A	3.2	3.2	1.8	5.2	1.8	#N/A	#N/A	#N/A	#N/A	#N/A	#N/A	#N/A	#N/A
2018-03-20 09:00:00	6.7	2.3	2	1.4	#N/A	5.3	5.3	2.2	7	2.2	#N/A	3.1	3.1	1.8	5.2	1.8	#N/A	#N/A	#N/A	#N/A	#N/A	#N/A	#N/A	#N/A
2018-03-20 10:00:00	7.8	2.3	6.5	1.4	#N/A	5.2	5.2	2.2	7	2.2	#N/A	3	3	1.8	5.2	1.8	#N/A	#N/A	#N/A	#N/A	#N/A	#N/A	#N/A	#N/A
2018-03-20 11:00:00	8.4	2.3	8.5	1.4	#N/A	5.3	5.3	2.2	7	2.2	#N/A	3	3	1.8	5.2	1.8	#N/A	#N/A	#N/A	#N/A	#N/A	#N/A	#N/A	#N/A
2018-03-20 12:00:00	8.6	2.3	10.2	1.4	#N/A	5.2	5.2	2.2	7	2.2	#N/A	2.9	2.9	1.8	5.2	1.8	#N/A	#N/A	#N/A	#N/A	#N/A	#N/A	#N/A	#N/A
2018-03-20 13:00:00	10.1	2.3	11.2	1.4	#N/A	5.2	5.2	2.2	7	2.2	#N/A	2.9	2.9	1.8	5.2	1.8	#N/A	#N/A	#N/A	#N/A	#N/A	#N/A	#N/A	#N/A
2018-03-20 14:00:00	9.6	2.3	10.5	1.4	#N/A	7.4	7.4	2.2	7	2.2	#N/A	3.2	3.2	1.8	5.2	1.8	#N/A	#N/A	#N/A	#N/A	#N/A	#N/A	#N/A	#N/A
2018-03-20 15:00:00	9	2.3	11.3	1.4	#N/A	8.4	8.4	2.2	7	2.2	#N/A	5.3	5.3	1.8	5.2	1.8	#N/A	#N/A	#N/A	#N/A	#N/A	#N/A	#N/A	#N/A
2018-03-20 16:00:00	8.6	2.3	8.3	1.4	#N/A	8.7	8.7	2.2	7	2.2	#N/A	6.9	6.9	1.8	5.2	1.8	#N/A	#N/A	#N/A	#N/A	#N/A	#N/A	#N/A	#N/A
2018-03-20 17:00:00	6.7	2.3	6.9	1.4	#N/A	8.8	8.8	2.2	7	2.2	#N/A	7.6	7.6	1.8	5.2	1.8	#N/A	#N/A	#N/A	#N/A	#N/A	#N/A	#N/A	#N/A
2018-03-20 18:00:00	3.9	2.3	3	1.4	#N/A	8.9	8.9	2.2	7	2.2	#N/A	8.2	8.2	1.8	5.2	1.8	#N/A	#N/A	#N/A	#N/A	#N/A	#N/A	#N/A	#N/A
2018-03-20 19:00:00	2.9	2.3	-0.1	1.4	#N/A	9.3	9.3	2.2	7	2.2	#N/A	8.6	8.6	1.8	5.2	1.8	#N/A	#N/A	#N/A	#N/A	#N/A	#N/A	#N/A	#N/A
2018-03-20 20:00:00	2.2	2.3	-1.2	1.4	#N/A	9.2	9.2	2.2	7	2.2	#N/A	8.3	8.3	1.8	5.2	1.8	#N/A	#N/A	#N/A	#N/A	#N/A	#N/A	#N/A	#N/A
2018-03-20 21:00:00	-0.1	2.3	-2	1.4	#N/A	9	9	2.2	7	2.2	#N/A	8.6	8.6	1.8	5.2	1.8	#N/A	#N/A	#N/A	#N/A	#N/A	#N/A	#N/A	#N/A
2018-03-20 22:00:00	-0.8	2.3	-2.5	1.4	#N/A	8.9	8.9	2.2	7	2.2	#N/A	7.5	7.5	1.8	5.2	1.8	#N/A	#N/A	#N/A	#N/A	#N/A	#N/A	#N/A	#N/A
2018-03-20 23:00:00	-0.5	2.3	-2	1.4	#N/A	8.3	8.3	2.2	7	2.2	#N/A	7	7	1.8	5.2	1.8	#N/A	#N/A	#N/A	#N/A	#N/A	#N/A	#N/A	#N/A
2018-03-21	0.3	1.5	-2.7	0.8	#N/A	7.5	7.5	2.2	6.9	2.2	#N/A	5.6	5.6	1.8	4.7	1.8	#N/A	#N/A	#N/A	#N/A	#N/A	#N/A	#N/A	#N/A
2018-03-21 01:00:00	0.1	1.5	-2.8	0.8	#N/A	7.2	7.2	2.2	6.9	2.2	#N/A	4.4	4.4	1.8	4.7	1.8	#N/A	#N/A	#N/A	#N/A	#N/A	#N/A	#N/A	#N/A
2018-03-21 02:00:00	-0.1	1.5	-2.5	0.8	#N/A	7	7	2.2	6.9	2.2	#N/A	4.1	4.1	1.8	4.7	1.8	#N/A	#N/A	#N/A	#N/A	#N/A	#N/A	#N/A	#N/A
2018-03-21 03:00:00	-1.3	1.5	-2.7	0.8	#N/A	6.3	6.3	2.2	6.9	2.2	#N/A	3.8	3.8	1.8	4.7	1.8	#N/A	#N/A	#N/A	#N/A	#N/A	#N/A	#N/A	#N/A
2018-03-21 04:00:00	-1.8	1.5	-2.9	0.8	#N/A	6.1	6.1	2.2	6.9	2.2	#N/A	3.6	3.6	1.8	4.7	1.8	#N/A	#N/A	#N/A	#N/A	#N/A	#N/A	#N/A	#N/A
2018-03-21 05:00:00	-2.2	1.5	-3.4	0.8	#N/A	6.2	6.2	2.2	6.9	2.2	#N/A	3.8	3.8	1.8	4.7	1.8	#N/A	#N/A	#N/A	#N/A	#N/A	#N/A	#N/A	#N/A
2018-03-21 06:00:00	-1.9	1.5	-3.1	0.8	#N/A	6.5	6.5	2.2	6.9	2.2	#N/A	3.5	3.5	1.8	4.7	1.8	#N/A	#N/A	#N/A	#N/A	#N/A	#N/A	#N/A	#N/A
2018-03-21 07:00:00	-0.7	1.5	-2.8	0.8	#N/A	6.4	6.4	2.2	6.9	2.2	#N/A	3.5	3.5	1.8	4.7	1.8	#N/A	#N/A	#N/A	#N/A	#N/A	#N/A	#N/A	#N/A
2018-03-21 08:00:00	0.7	1.5	-2	0.8	#N/A	6.4	6.4	2.2	6.9	2.2	#N/A	3.6	3.6	1.8	4.7	1.8	#N/A	#N/A	#N/A	#N/A	#N/A	#N/A	#N/A	#N/A
2018-03-21 09:00:00	2.8	1.5	0.1	0.8	#N/A	6	6	2.2	6.9	2.2	#N/A	3.5	3.5	1.8	4.7	1.8	#N/A	#N/A	#N/A	#N/A	#N/A	#N/A	#N/A	#N/A
2018-03-21 10:00:00	4	1.5	2.3	0.8	#N/A	5.8	5.8	2.2	6.9	2.2	#N/A	3.4	3.4	1.8	4.7	1.8	#N/A	#N/A	#N/A	#N/A	#N/A	#N/A	#N/A	#N/A
2018-03-21 11:00:00	6.4	1.5	6.3	0.8	#N/A	5.6	5.6	2.2	6.9	2.2	#N/A	3.1	3.1	1.8	4.7	1.8	#N/A	#N/A	#N/A	#N/A	#N/A	#N/A	#N/A	#N/A
2018-03-21 12:00:00	7.4	1.5	9.4	0.8	#N/A	5.7	5.7	2.2	6.9	2.2	#N/A	3.2	3.2	1.8	4.7	1.8	#N/A	#N/A	#N/A	#N/A	#N/A	#N/A	#N/A	#N/A
2018-03-21 13:00:00	7	1.5	10.5	0.8	#N/A	6	6	2.2	6.9	2.2	#N/A	3.3	3.3	1.8	4.7	1.8	#N/A	#N/A	#N/A	#N/A	#N/A	#N/A	#N/A	#N/A
2018-03-21 14:00:00	7.4	1.5	8.8	0.8	#N/A	6.3	6.3	2.2	6.9	2.2	#N/A	3.6	3.6	1.8	4.7	1.8	#N/A	#N/A	#N/A	#N/A	#N/A	#N/A	#N/A	#N/A
2018-03-21 15:00:00	6.4	1.5	8.2	0.8	#N/A	6.9	6.9	2.2	6.9	2.2	#N/A	4.3	4.3	1.8	4.7	1.8	#N/A	#N/A	#N/A	#N/A	#N/A	#N/A	#N/A	#N/A
2018-03-21 16:00:00	6.8	1.5	7.3	0.8	#N/A	7.3	7.3	2.2	6.9	2.2	#N/A	5.1	5.1	1.8	4.7	1.8	#N/A	#N/A	#N/A	#N/A	#N/A	#N/A	#N/A	#N/A
2018-03-21 17:00:00	5.4	1.5	5	0.8	#N/A	7.9	7.9	2.2	6.9	2.2	#N/A	6.5	6.5	1.8	4.7	1.8	#N/A	#N/A	#N/A	#N/A	#N/A	#N/A	#N/A	#N/A
2018-03-21 18:00:00	3.1	1.5	1.4	0.8	#N/A	8.2	8.2	2.2	6.9	2.2	#N/A	7.6	7.6	1.8	4.7	1.8	#N/A	#N/A	#N/A	#N/A	#N/A	#N/A	#N/A	#N/A
2018-03-21 19:00:00	-0.9	1.5	-1.7	0.8	#N/A	8	8	2.2	6.9	2.2	#N/A	7.9	7.9	1.8	4.7	1.8	#N/A	#N/A	#N/A	#N/A	#N/A	#N/A	#N/A	#N/A
2018-03-21 20:00:00	-2.4	1.5	-3	0.8	#N/A	8.1	8.1	2.2	6.9	2.2	#N/A	7.3	7.3	1.8	4.7	1.8	#N/A	#N/A	#N/A	#N/A	#N/A	#N/A	#N/A	#N/A
2018-03-21 21:00:00	-3.2	1.5	-3.4	0.8	#N/A	7.8	7.8	2.2	6.9	2.2	#N/A	7	7	1.8	4.7	1.8	#N/A	#N/A	#N/A	#N/A	#N/A	#N/A	#N/A	#N/A
2018-03-21 22:00:00	-3.9	1.5	-3.3	0.8	#N/A	7.9	7.9	2.2	6.9	2.2	#N/A	6.7	6.7	1.8	4.7	1.8	#N/A	#N/A	#N/A	#N/A	#N/A	#N/A	#N/A	#N/A
2018-03-21 23:00:00	-4.6	1.5	-3.8	0.8	#N/A	7.4	7.4	2.2	6.9	2.2	#N/A	5.8	5.8	1.8	4.7	1.8	#N/A	#N/A	#N/A	#N/A	#N/A	#N/A	#N/A	#N/A
2018-03-22	-5.1	2.3	-4.1	1.3	#N/A	6.7	6.7	2.2	5.6	2.2	#N/A	4.5	4.5	1.8	3.9	1.8	#N/A	#N/A	#N/A	#N/A	#N/A	#N/A	#N/A	#N/A
2018-03-22 01:00:00	-5.6	2.3	-4.9	1.3	#N/A	5.4	5.4	2.2	5.6	2.2	#N/A	3.3	3.3	1.8	3.9	1.8	#N/A	#N/A	#N/A	#N/A	#N/A	#N/A	#N/A	#N/A
2018-03-22 02:00:00	-6.1	2.3	-6	1.3	#N/A	4.9	4.9	2.2	5.6	2.2	#N/A	2.8	2.8	1.8	3.9	1.8	#N/A	#N/A	#N/A	#N/A	#N/A	#N/A	#N/A	#N/A
2018-03-22 03:00:00	-6.5	2.3	-6.6	1.3	#N/A	4.5	4.5	2.2	5.6	2.2	#N/A	2.6	2.6	1.8	3.9	1.8	#N/A	#N/A	#N/A	#N/A	#N/A	#N/A	#N/A	#N/A
2018-03-22 04:00:00	-6.4	2.3	-6.7	1.3	#N/A	4.3	4.3	2.2	5.6	2.2	#N/A	2.6	2.6	1.8	3.9	1.8	#N/A	#N/A	#N/A	#N/A	#N/A	#N/A	#N/A	#N/A
2018-03-22 05:00:00	-6.6	2.3	-6.9	1.3	#N/A	4	4	2.2	5.6	2.2	#N/A	2.3	2.3	1.8	3.9	1.8	#N/A	#N/A	#N/A	#N/A	#N/A	#N/A	#N/A	#N/A
2018-03-22 06:00:00	-6.1	2.3	-6.8	1.3	#N/A	3.7	3.7	2.2	5.6	2.2	#N/A	2.1	2.1	1.8	3.9	1.8	#N/A	#N/A	#N/A	#N/A	#N/A	#N/A	#N/A	#N/A
2018-03-22 07:00:00	-6.1	2.3	-6.5	1.3	#N/A	3.4	3.4	2.2	5.6	2.2	#N/A	1.8	1.8	1.8	3.9	1.8	#N/A	#N/A	#N/A	#N/A	#N/A	#N/A	#N/A	#N/A
2018-03-22 08:00:00	1.9	2.3	-5.6	1.3	#N/A	3.3	3.3	2.2	5.6	2.2	#N/A	1.4	1.4	1.8	3.9	1.8	#N/A	#N/A	#N/A	#N/A	#N/A	#N/A	#N/A	#N/A
2018-03-22 09:00:00	5.2	2.3	-0.1	1.3	#N/A	3.1	3.1	2.2	5.6	2.2	#N/A	1.1	1.1	1.8	3.9	1.8	#N/A	#N/A	#N/A	#N/A	#N/A	#N/A	#N/A	#N/A
2018-03-22 10:00:00	7.7	2.3	6.4	1.3	#N/A	3.2	3.2	2.2	5.6	2.2	#N/A	1.1	1.1	1.8	3.9	1.8	#N/A	#N/A	#N/A	#N/A	#N/A	#N/A	#N/A	#N/A
2018-03-22 11:00:00	9.2	2.3	9.1	1.3	#N/A	3.1	3.1	2.2	5.6	2.2	#N/A	1.1	1.1	1.8	3.9	1.8	#N/A	#N/A	#N/A	#N/A	#N/A	#N/A	#N/A	#N/A
2018-03-22 12:00:00	9.8	2.3	10.6	1.3	#N/A	3.3	3.3	2.2	5.6	2.2	#N/A	1.1	1.1	1.8	3.9	1.8	#N/A	#N/A	#N/A	#N/A	#N/A	#N/A	#N/A	#N/A
2018-03-22 13:00:00	10.8	2.3	11.3	1.3	#N/A	3.3	3.3	2.2	5.6	2.2	#N/A	1.3	1.3	1.8	3.9	1.8	#N/A	#N/A	#N/A	#N/A	#N/A	#N/A	#N/A	#N/A
2018-03-22 14:00:00	11.2	2.3	12.1	1.3	#N/A	5.8	5.8	2.2	5.6	2.2	#N/A	1.6	1.6	1.8	3.9	1.8	#N/A	#N/A	#N/A	#N/A	#N/A	#N/A	#N/A	#N/A
2018-03-22 15:00:00	11.9	2.3	12.7	1.3	#N/A	6.8	6.8	2.2	5.6	2.2	#N/A	3.7	3.7	1.8	3.9	1.8	#N/A	#N/A	#N/A	#N/A	#N/A	#N/A	#N/A	#N/A
2018-03-22 16:00:00	10.2	2.3	11.7	1.3	#N/A	7.5	7.5	2.2	5.6	2.2	#N/A	6.1	6.1	1.8	3.9	1.8	#N/A	#N/A	#N/A	#N/A	#N/A	#N/A	#N/A	#N/A
2018-03-22 17:00:00	8.9	2.3	7.8	1.3	#N/A	8	8	2.2	5.6	2.2	#N/A	7.1	7.1	1.8	3.9	1.8	#N/A	#N/A	#N/A	#N/A	#N/A	#N/A	#N/A	#N/A
2018-03-22 18:00:00	6.6	2.3	4.4	1.3	#N/A	8.2	8.2	2.2	5.6	2.2	#N/A	7.6	7.6	1.8	3.9	1.8	#N/A	#N/A	#N/A	#N/A	#N/A	#N/A	#N/A	#N/A
2018-03-22 19:00:00	5.9	2.3	1.7	1.3	#N/A	8.5	8.5	2.2	5.6	2.2	#N/A	7.8	7.8	1.8	3.9	1.8	#N/A	#N/A	#N/A	#N/A	#N/A	#N/A	#N/A	#N/A
2018-03-22 20:00:00	2.5	2.3	0.4	1.3	#N/A	8.6	8.6	2.2	5.6	2.2	#N/A	8.1	8.1	1.8	3.9	1.8	#N/A	#N/A	#N/A	#N/A	#N/A	#N/A	#N/A	#N/A
2018-03-22 21:00:00	1.7	2.3	-0.2	1.3	#N/A	8.8	8.8	2.2	5.6	2.2	#N/A	8.3	8.3	1.8	3.9	1.8	#N/A	#N/A	#N/A	#N/A	#N/A	#N/A	#N/A	#N/A
2018-03-22 22:00:00	0.2	2.3	-1.1	1.3	#N/A	8.3	8.3	2.2	5.6	2.2	#N/A	7.9	7.9	1.8	3.9	1.8	#N/A	#N/A	#N/A	#N/A	#N/A	#N/A	#N/A	#N/A
2018-03-22 23:00:00	0.3	2.3	-1.4	1.3	#N/A	8	8	2.2	5.6	2.2	#N/A	6.5	6.5	1.8	3.9	1.8	#N/A	#N/A	#N/A	#N/A	#N/A	#N/A	#N/A	#N/A
2018-03-23	-1.3	4.1	-1.9	3.6	#N/A	7.3	7.3	2.2	6.6	2.2	#N/A	5.3	5.3	1.8	4.8	1.8	#N/A	#N/A	#N/A	#N/A	#N/A	#N/A	#N/A	#N/A
2018-03-23 01:00:00	0.1	4.1	-1.9	3.6	#N/A	7	7	2.2	6.6	2.2	#N/A	4.3	4.3	1.8	4.8	1.8	#N/A	#N/A	#N/A	#N/A	#N/A	#N/A	#N/A	#N/A
2018-03-23 02:00:00	-0.9	4.1	-2.3	3.6	#N/A	6	6	2.2	6.6	2.2	#N/A	3.8	3.8	1.8	4.8	1.8	#N/A	#N/A	#N/A	#N/A	#N/A	#N/A	#N/A	#N/A
2018-03-23 03:00:00	-2.1	4.1	-2.3	3.6	#N/A	5.8	5.8	2.2	6.6	2.2	#N/A	3.6	3.6	1.8	4.8	1.8	#N/A	#N/A	#N/A	#N/A	#N/A	#N/A	#N/A	#N/A
2018-03-23 04:00:00	-2	4.1	-2.6	3.6	#N/A	5.3	5.3	2.2	6.6	2.2	#N/A	3.3	3.3	1.8	4.8	1.8	#N/A	#N/A	#N/A	#N/A	#N/A	#N/A	#N/A	#N/A
2018-03-23 05:00:00	-1.9	4.1	-3	3.6	#N/A	5.3	5.3	2.2	6.6	2.2	#N/A	3.2	3.2	1.8	4.8	1.8	#N/A	#N/A	#N/A	#N/A	#N/A	#N/A	#N/A	#N/A
2018-03-23 06:00:00	-3	4.1	-3.5	3.6	#N/A	4.8	4.8	2.2	6.6	2.2	#N/A	2.9	2.9	1.8	4.8	1.8	#N/A	#N/A	#N/A	#N/A	#N/A	#N/A	#N/A	#N/A
2018-03-23 07:00:00	-2.2	4.1	-3.2	3.6	#N/A	5.2	5.2	2.2	6.6	2.2	#N/A	2.9	2.9	1.8	4.8	1.8	#N/A	#N/A	#N/A	#N/A	#N/A	#N/A	#N/A	#N/A
2018-03-23 08:00:00	5.7	4.1	-1.9	3.6	#N/A	5	5	2.2	6.6	2.2	#N/A	2.8	2.8	1.8	4.8	1.8	#N/A	#N/A	#N/A	#N/A	#N/A	#N/A	#N/A	#N/A
2018-03-23 09:00:00	8.5	4.1	3.6	3.6	#N/A	4.6	4.6	2.2	6.6	2.2	#N/A	2.8	2.8	1.8	4.8	1.8	#N/A	#N/A	#N/A	#N/A	#N/A	#N/A	#N/A	#N/A
2018-03-23 10:00:00	10	4.1	9.4	3.6	#N/A	4.6	4.6	2.2	6.6	2.2	#N/A	2.7	2.7	1.8	4.8	1.8	#N/A	#N/A	#N/A	#N/A	#N/A	#N/A	#N/A	#N/A
2018-03-23 11:00:00	10.3	4.1	10.7	3.6	#N/A	4.7	4.7	2.2	6.6	2.2	#N/A	2.5	2.5	1.8	4.8	1.8	#N/A	#N/A	#N/A	#N/A	#N/A	#N/A	#N/A	#N/A
2018-03-23 12:00:00	10.7	4.1	12.4	3.6	#N/A	4.3	4.3	2.2	6.6	2.2	#N/A	2.4	2.4	1.8	4.8	1.8	#N/A	#N/A	#N/A	#N/A	#N/A	#N/A	#N/A	#N/A
2018-03-23 13:00:00	11.1	4.1	11.6	3.6	#N/A	4.6	4.6	2.2	6.6	2.2	#N/A	2.5	2.5	1.8	4.8	1.8	#N/A	#N/A	#N/A	#N/A	#N/A	#N/A	#N/A	#N/A
2018-03-23 14:00:00	11.7	4.1	13	3.6	#N/A	6.9	6.9	2.2	6.6	2.2	#N/A	2.9	2.9	1.8	4.8	1.8	#N/A	#N/A	#N/A	#N/A	#N/A	#N/A	#N/A	#N/A
2018-03-23 15:00:00	12.3	4.1	13.1	3.6	#N/A	7.8	7.8	2.2	6.6	2.2	#N/A	4.9	4.9	1.8	4.8	1.8	#N/A	#N/A	#N/A	#N/A	#N/A	#N/A	#N/A	#N/A
2018-03-23 16:00:00	12.1	4.1	12.4	3.6	#N/A	8.2	8.2	2.2	6.6	2.2	#N/A	7	7	1.8	4.8	1.8	#N/A	#N/A	#N/A	#N/A	#N/A	#N/A	#N/A	#N/A
2018-03-23 17:00:00	11.4	4.1	10.5	3.6	#N/A	8.3	8.3	2.2	6.6	2.2	#N/A	7.5	7.5	1.8	4.8	1.8	#N/A	#N/A	#N/A	#N/A	#N/A	#N/A	#N/A	#N/A
2018-03-23 18:00:00	7.6	4.1	7	3.6	#N/A	8.4	8.4	2.2	6.6	2.2	#N/A	8.2	8.2	1.8	4.8	1.8	#N/A	#N/A	#N/A	#N/A	#N/A	#N/A	#N/A	#N/A
2018-03-23 19:00:00	3.5	4.1	4.5	3.6	#N/A	8.5	8.5	2.2	6.6	2.2	#N/A	7.9	7.9	1.8	4.8	1.8	#N/A	#N/A	#N/A	#N/A	#N/A	#N/A	#N/A	#N/A
2018-03-23 20:00:00	1.6	4.1	2.8	3.6	#N/A	8.7	8.7	2.2	6.6	2.2	#N/A	8.4	8.4	1.8	4.8	1.8	#N/A	#N/A	#N/A	#N/A	#N/A	#N/A	#N/A	#N/A
2018-03-23 21:00:00	-0.2	4.1	0.2	3.6	#N/A	8.8	8.8	2.2	6.6	2.2	#N/A	8.4	8.4	1.8	4.8	1.8	#N/A	#N/A	#N/A	#N/A	#N/A	#N/A	#N/A	#N/A
2018-03-23 22:00:00	-1.4	4.1	-1.2	3.6	#N/A	8.7	8.7	2.2	6.6	2.2	#N/A	8.1	8.1	1.8	4.8	1.8	#N/A	#N/A	#N/A	#N/A	#N/A	#N/A	#N/A	#N/A
2018-03-23 23:00:00	-2.3	4.1	-1.4	3.6	#N/A	8.5	8.5	2.2	6.6	2.2	#N/A	7.4	7.4	1.8	4.8	1.8	#N/A	#N/A	#N/A	#N/A	#N/A	#N/A	#N/A	#N/A
2018-03-24	-2.5	4.1	-1.1	4.4	#N/A	7.3	7.3	2.2	6	2.2	#N/A	6.1	6.1	1.8	5.2	1.8	#N/A	#N/A	#N/A	#N/A	#N/A	#N/A	#N/A	#N/A
2018-03-24 01:00:00	-2.7	4.1	-1.5	4.4	#N/A	6	6	2.2	6	2.2	#N/A	5.2	5.2	1.8	5.2	1.8	#N/A	#N/A	#N/A	#N/A	#N/A	#N/A	#N/A	#N/A
2018-03-24 02:00:00	-3.1	4.1	-0.9	4.4	#N/A	5.4	5.4	2.2	6	2.2	#N/A	4.5	4.5	1.8	5.2	1.8	#N/A	#N/A	#N/A	#N/A	#N/A	#N/A	#N/A	#N/A
2018-03-24 03:00:00	-3.4	4.1	-1.2	4.4	#N/A	4.9	4.9	2.2	6	2.2	#N/A	3.6	3.6	1.8	5.2	1.8	#N/A	#N/A	#N/A	#N/A	#N/A	#N/A	#N/A	#N/A
2018-03-24 04:00:00	-3.4	4.1	-1.1	4.4	#N/A	4.5	4.5	2.2	6	2.2	#N/A	3.1	3.1	1.8	5.2	1.8	#N/A	#N/A	#N/A	#N/A	#N/A	#N/A	#N/A	#N/A
2018-03-24 05:00:00	-3.8	4.1	-1.3	4.4	#N/A	4.2	4.2	2.2	6	2.2	#N/A	3	3	1.8	5.2	1.8	#N/A	#N/A	#N/A	#N/A	#N/A	#N/A	#N/A	#N/A
2018-03-24 06:00:00	-3.9	4.1	-1.5	4.4	#N/A	4.1	4.1	2.2	6	2.2	#N/A	3.1	3.1	1.8	5.2	1.8	#N/A	#N/A	#N/A	#N/A	#N/A	#N/A	#N/A	#N/A
2018-03-24 07:00:00	-3.2	4.1	-1.1	4.4	#N/A	4	4	2.2	6	2.2	#N/A	3	3	1.8	5.2	1.8	#N/A	#N/A	#N/A	#N/A	#N/A	#N/A	#N/A	#N/A
2018-03-24 08:00:00	4.9	4.1	0.3	4.4	#N/A	3.9	3.9	2.2	6	2.2	#N/A	3.2	3.2	1.8	5.2	1.8	#N/A	#N/A	#N/A	#N/A	#N/A	#N/A	#N/A	#N/A
2018-03-24 09:00:00	8.6	4.1	4.7	4.4	#N/A	3.9	3.9	2.2	6	2.2	#N/A	3.1	3.1	1.8	5.2	1.8	#N/A	#N/A	#N/A	#N/A	#N/A	#N/A	#N/A	#N/A
2018-03-24 10:00:00	9.7	4.1	10	4.4	#N/A	3.9	3.9	2.2	6	2.2	#N/A	3.2	3.2	1.8	5.2	1.8	#N/A	#N/A	#N/A	#N/A	#N/A	#N/A	#N/A	#N/A
2018-03-24 11:00:00	10.4	4.1	12.3	4.4	#N/A	3.9	3.9	2.2	6	2.2	#N/A	3.2	3.2	1.8	5.2	1.8	#N/A	#N/A	#N/A	#N/A	#N/A	#N/A	#N/A	#N/A
2018-03-24 12:00:00	10.6	4.1	12.7	4.4	#N/A	3.9	3.9	2.2	6	2.2	#N/A	3.2	3.2	1.8	5.2	1.8	#N/A	#N/A	#N/A	#N/A	#N/A	#N/A	#N/A	#N/A
2018-03-24 13:00:00	10.6	4.1	12.8	4.4	#N/A	4.2	4.2	2.2	6	2.2	#N/A	3.4	3.4	1.8	5.2	1.8	#N/A	#N/A	#N/A	#N/A	#N/A	#N/A	#N/A	#N/A
2018-03-24 14:00:00	10.3	4.1	12.4	4.4	#N/A	6.6	6.6	2.2	6	2.2	#N/A	4	4	1.8	5.2	1.8	#N/A	#N/A	#N/A	#N/A	#N/A	#N/A	#N/A	#N/A
2018-03-24 15:00:00	10.1	4.1	11.8	4.4	#N/A	7.7	7.7	2.2	6	2.2	#N/A	5.6	5.6	1.8	5.2	1.8	#N/A	#N/A	#N/A	#N/A	#N/A	#N/A	#N/A	#N/A
2018-03-24 16:00:00	9	4.1	9.2	4.4	#N/A	8.1	8.1	2.2	6	2.2	#N/A	7.5	7.5	1.8	5.2	1.8	#N/A	#N/A	#N/A	#N/A	#N/A	#N/A	#N/A	#N/A
2018-03-24 17:00:00	7.3	4.1	6.7	4.4	#N/A	8.3	8.3	2.2	6	2.2	#N/A	8.4	8.4	1.8	5.2	1.8	#N/A	#N/A	#N/A	#N/A	#N/A	#N/A	#N/A	#N/A
2018-03-24 18:00:00	6.5	4.1	4.9	4.4	#N/A	8.4	8.4	2.2	6	2.2	#N/A	8.5	8.5	1.8	5.2	1.8	#N/A	#N/A	#N/A	#N/A	#N/A	#N/A	#N/A	#N/A
2018-03-24 19:00:00	6	4.1	4.1	4.4	#N/A	8.4	8.4	2.2	6	2.2	#N/A	8.6	8.6	1.8	5.2	1.8	#N/A	#N/A	#N/A	#N/A	#N/A	#N/A	#N/A	#N/A
2018-03-24 20:00:00	5.7	4.1	3.7	4.4	#N/A	8.4	8.4	2.2	6	2.2	#N/A	8.5	8.5	1.8	5.2	1.8	#N/A	#N/A	#N/A	#N/A	#N/A	#N/A	#N/A	#N/A
2018-03-24 21:00:00	5.1	4.1	3.3	4.4	#N/A	8.3	8.3	2.2	6	2.2	#N/A	8.3	8.3	1.8	5.2	1.8	#N/A	#N/A	#N/A	#N/A	#N/A	#N/A	#N/A	#N/A
2018-03-24 22:00:00	5.5	4.1	3	4.4	#N/A	8.1	8.1	2.2	6	2.2	#N/A	7.3	7.3	1.8	5.2	1.8	#N/A	#N/A	#N/A	#N/A	#N/A	#N/A	#N/A	#N/A
2018-03-24 23:00:00	4.6	4.1	2.5	4.4	#N/A	7.6	7.6	2.2	6	2.2	#N/A	6.5	6.5	1.8	5.2	1.8	#N/A	#N/A	#N/A	#N/A	#N/A	#N/A	#N/A	#N/A
2018-03-25	2.4	3.7	1.8	3.6	#N/A	7.4	7.4	2.2	6.9	2.2	#N/A	5.8	5.8	1.8	5.7	1.8	#N/A	#N/A	#N/A	#N/A	#N/A	#N/A	#N/A	#N/A
2018-03-25 01:00:00	0.5	3.7	0.4	3.6	#N/A	7.2	7.2	2.2	6.9	2.2	#N/A	5.6	5.6	1.8	5.7	1.8	#N/A	#N/A	#N/A	#N/A	#N/A	#N/A	#N/A	#N/A
2018-03-25 02:00:00	-1.4	3.7	-0.9	3.6	#N/A	7.1	7.1	2.2	6.9	2.2	#N/A	5.4	5.4	1.8	5.7	1.8	#N/A	#N/A	#N/A	#N/A	#N/A	#N/A	#N/A	#N/A
2018-03-25 03:00:00	-2.3	3.7	-2	3.6	#N/A	7	7	2.2	6.9	2.2	#N/A	5.3	5.3	1.8	5.7	1.8	#N/A	#N/A	#N/A	#N/A	#N/A	#N/A	#N/A	#N/A
2018-03-25 04:00:00	-3.2	3.7	-2.4	3.6	#N/A	7.1	7.1	2.2	6.9	2.2	#N/A	5.2	5.2	1.8	5.7	1.8	#N/A	#N/A	#N/A	#N/A	#N/A	#N/A	#N/A	#N/A
2018-03-25 05:00:00	-3.6	3.7	-2.3	3.6	#N/A	6.8	6.8	2.2	6.9	2.2	#N/A	5	5	1.8	5.7	1.8	#N/A	#N/A	#N/A	#N/A	#N/A	#N/A	#N/A	#N/A
[truncated: 15,522 more rows]

## Sheet: Table S2
Table S2. Climate data based on daily resolution: rainfall.
Date	Moulin Daily Rainfall (mm)	Brusquet Daily Rainfall (mm)
2018-01-01	7.2	5.6
2018-01-02	0	0
2018-01-03	5.8	7.6
2018-01-04	7.8	9.7
2018-01-05	0	0
2018-01-06	0	0.1
2018-01-07	0.8	0.3
2018-01-08	32.4	19.7
2018-01-09	17.6	12.2
2018-01-10	0.8	0.4
2018-01-11	0.2	0.1
2018-01-12	0.2	0.2
2018-01-13	0	0.1
2018-01-14	0	0
2018-01-15	1.6	2.5
2018-01-16	7.2	6
2018-01-17	7.2	6.6
2018-01-18	0	0
2018-01-19	0.2	0
2018-01-20	3.2	3.7
2018-01-21	9.8	8.4
2018-01-22	0	0
2018-01-23	0	0
2018-01-24	0	0
2018-01-25	0.2	0.1
2018-01-26	1.2	0.9
2018-01-27	5.2	5.9
2018-01-28	0	0.1
2018-01-29	0.2	0.1
2018-01-30	0.2	0.1
2018-01-31	0	0
2018-02-01	5.6	9
2018-02-02	0	0
2018-02-03	0	0
2018-02-04	0	0
2018-02-05	0	0.4
2018-02-06	0	0
2018-02-07	0	0
2018-02-08	0	0
2018-02-09	0	0.1
2018-02-10	0	0
2018-02-11	0	0
2018-02-12	0	0
2018-02-13	0	0
2018-02-14	0.2	0.3
2018-02-15	0	0
2018-02-16	0.2	0
2018-02-17	17.2	20.3
2018-02-18	0	0.1
2018-02-19	0	0
2018-02-20	0	0.1
2018-02-21	0	0
2018-02-22	0	0
2018-02-23	0	0
2018-02-24	0	0
2018-02-25	0.2	0
2018-02-26	0	0
2018-02-27	0	0
2018-02-28	0	0
2018-03-01	16.4	1.1
2018-03-02	23.4	9.5
2018-03-03	9.2	9.3
2018-03-04	0.2	0
2018-03-05	6.6	6.3
2018-03-06	1.8	2
2018-03-07	0	0
2018-03-08	0.2	0
2018-03-09	0	0
2018-03-10	6.4	2.6
2018-03-11	48.8	22.2
2018-03-12	8.4	8
2018-03-13	0.2	0.1
2018-03-14	0.2	0.1
2018-03-15	33.8	18.8
2018-03-16	0.6	1
2018-03-17	7.6	6.1
2018-03-18	0.2	0.1
2018-03-19	0	0.1
2018-03-20	0	0
2018-03-21	0	0
2018-03-22	0	0
2018-03-23	0	0
2018-03-24	0.2	0
2018-03-25	0	0
2018-03-26	0	0.1
2018-03-27	0	0
2018-03-28	0.2	0
2018-03-29	1	0.9
2018-03-30	4	2.1
2018-03-31	17	17.1
2018-04-01	0	0
2018-04-02	0.2	0
2018-04-03	0.2	0.1
2018-04-04	3.8	0.6
2018-04-05	0	0.1
2018-04-06	0	0
2018-04-07	0	0
2018-04-08	0.4	0
2018-04-09	2.8	1.6
2018-04-10	19.2	12.3
2018-04-11	10.4	7.8
2018-04-12	44.8	32.8
2018-04-13	1.6	1.5
2018-04-14	0	0
2018-04-15	0	0.1
2018-04-16	0	0
2018-04-17	0	0
2018-04-18	0	0
2018-04-19	0	0
2018-04-20	0	0
2018-04-21	0	0
2018-04-22	0	0
2018-04-23	0	0
2018-04-24	0	0
2018-04-25	0	0
2018-04-26	0	0
2018-04-27	0	0
2018-04-28	0	0
2018-04-29	22.8	19.3
2018-04-30	0.2	0.8
2018-05-01	2.2	1.9
2018-05-02	1	0.3
2018-05-03	0	0
2018-05-04	0	0.1
2018-05-05	0.2	0
2018-05-06	0	0
2018-05-07	7	15.4
2018-05-08	16.4	1.9
2018-05-09	10.8	19.1
2018-05-10	5	3.4
2018-05-11	2.2	2.4
2018-05-12	0	0.3
2018-05-13	20.6	18.9
2018-05-14	3.4	1.7
2018-05-15	0.4	0.4
2018-05-16	13.2	8.4
2018-05-17	4.2	1.6
2018-05-18	3.2	1.5
2018-05-19	8.8	6.6
2018-05-20	0.4	0.2
2018-05-21	0.2	0.1
2018-05-22	3.6	5.5
2018-05-23	1	0
2018-05-24	0.2	0.1
2018-05-25	0	0
2018-05-26	0	0
2018-05-27	0.2	0
2018-05-28	0.6	1.1
2018-05-29	9.4	14.8
2018-05-30	4.6	2.8
2018-05-31	19	38.3
2018-06-01	0.2	0.1
2018-06-02	43.8	10.2
2018-06-03	0.4	0.1
2018-06-04	13.6	13.6
2018-06-05	15	7.8
2018-06-06	3.4	2.5
2018-06-07	4.2	6.7
2018-06-08	1.2	0.7
2018-06-09	0	0
2018-06-10	0	0
2018-06-11	13.2	13.3
2018-06-12	29.8	38.1
2018-06-13	0.6	1
2018-06-14	0	0
2018-06-15	0	0
2018-06-16	0	0
2018-06-17	0.2	0
2018-06-18	0	0
2018-06-19	0	0
2018-06-20	6.4	1.3
2018-06-21	0.4	0.2
2018-06-22	0.2	0
2018-06-23	0	0
2018-06-24	3.2	4.3
2018-06-25	0.2	0.1
2018-06-26	0	0
2018-06-27	0	0
2018-06-28	6.6	25.7
2018-06-29	0	0.1
2018-06-30	0	0
2018-07-01	0	0
2018-07-02	0.2	0
2018-07-03	8.8	14.2
2018-07-04	0.2	0.2
2018-07-05	0.2	0.2
2018-07-06	0	0
2018-07-07	0	0
2018-07-08	0	0
2018-07-09	10.4	24.3
2018-07-10	0.2	0.1
2018-07-11	0	0
2018-07-12	0	0
2018-07-13	0	0
2018-07-14	0	0
2018-07-15	4.4	2.2
2018-07-16	7.4	6.2
2018-07-17	0	0.1
2018-07-18	0	0
2018-07-19	0	0
2018-07-20	0	0
2018-07-21	13.6	7.8
2018-07-22	7.4	4.7
2018-07-23	0.2	0.1
2018-07-24	0	0
2018-07-25	1	4.5
2018-07-26	0	0
2018-07-27	0	0
2018-07-28	7.2	1.8
2018-07-29	0.2	0
2018-07-30	0	0
2018-07-31	0	0
2018-08-01	3	9.1
2018-08-02	0.2	0.1
2018-08-03	8.4	7.8
2018-08-04	28.2	40.6
2018-08-05	3.6	1.2
2018-08-06	0.2	0.1
2018-08-07	0	0.2
2018-08-08	0	0
2018-08-09	27.2	6.5
2018-08-10	0	0.1
2018-08-11	0.2	0.1
2018-08-12	0.2	0
2018-08-13	31	31.8
2018-08-14	0.2	0.2
2018-08-15	0	0
2018-08-16	0	0
2018-08-17	1.2	6.9
2018-08-18	0.4	0.7
2018-08-19	0.2	0.1
2018-08-20	26.2	6.2
2018-08-21	4	0.8
2018-08-22	14.2	17.6
2018-08-23	1.8	0.2
2018-08-24	0.2	0
2018-08-25	0	0
2018-08-26	0	0
2018-08-27	0	0
2018-08-28	0.2	0
2018-08-29	0	0
2018-08-30	0.2	0
2018-08-31	0	0
2018-09-01	0	0
2018-09-02	0.2	0
2018-09-03	0	0
2018-09-04	0	0
2018-09-05	0	0
2018-09-06	24.2	21
2018-09-07	0	0.2
2018-09-08	0.2	0
2018-09-09	0	0
2018-09-10	0.2	0.1
2018-09-11	0	0
2018-09-12	0.4	0
2018-09-13	0.2	0.1
2018-09-14	0	0
2018-09-15	0.4	0.1
2018-09-16	0	0.1
2018-09-17	0	0
2018-09-18	0.2	0
2018-09-19	0	0.7
2018-09-20	0.2	0.1
2018-09-21	0	0
2018-09-22	0	0
2018-09-23	0	0
2018-09-24	0	0
2018-09-25	0	0
2018-09-26	0	0
2018-09-27	0	0
2018-09-28	0.2	0.1
2018-09-29	0	0
2018-09-30	0	0
2018-10-01	0	0
2018-10-02	0	0
2018-10-03	0	0
2018-10-04	0	0
2018-10-05	0	0
2018-10-06	0	0
2018-10-07	18	11.2
2018-10-08	1	0.2
2018-10-09	0.4	0.3
2018-10-10	10	3.3
2018-10-11	9	9.8
2018-10-12	0.2	0.2
2018-10-13	0.2	0.2
2018-10-14	0	0
2018-10-15	0	0
2018-10-16	0	0.1
2018-10-17	0.2	0.1
2018-10-18	0.2	0
2018-10-19	0.2	0.2
2018-10-20	0.2	0.1
2018-10-21	0.2	0.1
2018-10-22	0.2	0
2018-10-23	0.2	0.2
2018-10-24	0	0
2018-10-25	0	0
2018-10-26	0	0
2018-10-27	34.6	31.1
2018-10-28	12.6	10.1
2018-10-29	64.4	43.1
2018-10-30	8	9.9
2018-10-31	18.6	7.2
2018-11-01	23.6	24.2
2018-11-02	1.6	2.3
2018-11-03	0.2	0.1
2018-11-04	0.4	0.2
2018-11-05	0.2	0.2
2018-11-06	46.4	31
2018-11-07	1.2	1.4
2018-11-08	2.2	1.8
2018-11-09	0.4	0
2018-11-10	1.2	0.7
2018-11-11	0	0.1
2018-11-12	0	0
2018-11-13	0.2	0
2018-11-14	0.2	0.2
2018-11-15	0.2	0.3
2018-11-16	0.2	0.2
2018-11-17	4.8	0.8
2018-11-18	0.4	0.1
2018-11-19	0.2	0.1
2018-11-20	0	0
2018-11-21	4.6	8.5
2018-11-22	0.2	0.1
2018-11-23	44.8	34.5
2018-11-24	1	0.5
2018-11-25	12.6	13.2
2018-11-26	1.6	0.1
2018-11-27	0	0.1
2018-11-28	0.2	0
2018-11-29	0	0
2018-11-30	9.8	8.8
2018-12-01	0	0.1
2018-12-02	0.4	0.4
2018-12-03	4.6	3.5
2018-12-04	0.4	0.2
2018-12-05	0	0
2018-12-06	0.2	0
2018-12-07	1.2	1.6
2018-12-08	0.2	0.2
2018-12-09	0.6	0.5
2018-12-10	0	0
2018-12-11	0	0.1
2018-12-12	0.2	0.1
2018-12-13	0	0
2018-12-14	0	0
2018-12-15	0	0.1
2018-12-16	13.6	12.4
2018-12-17	0.2	0.4
2018-12-18	0.2	0.1
2018-12-19	28.2	31.7
2018-12-20	0.2	0.2
2018-12-21	1.4	1.1
2018-12-22	0.2	0.3
2018-12-23	0	0
2018-12-24	0	0
2018-12-25	0.2	0.1
2018-12-26	0.2	0.1
2018-12-27	0	0
2018-12-28	0.2	0
2018-12-29	0	0
2018-12-30	0.2	0
2018-12-31	0	0
2019-01-01	0	0
2019-01-02	0	0
2019-01-03	0	0
2019-01-04	0.2	0
2019-01-05	0	0
2019-01-06	0	0
2019-01-07	0	0
2019-01-08	0.2	0
2019-01-09	0	0
2019-01-10	0	0
2019-01-11	0	0
2019-01-12	0	0
2019-01-13	0	0
2019-01-14	0	0
2019-01-15	0	0
2019-01-16	0	0
2019-01-17	1.4	1
2019-01-18	0	0.1
2019-01-19	0.2	0
2019-01-20	0	0
2019-01-21	0	0.1
2019-01-22	0	0
2019-01-23	0	0.1
2019-01-24	0	0
2019-01-25	0	0
2019-01-26	0	0
2019-01-27	4.8	5.1
2019-01-28	0.2	0.1
2019-01-29	0	0
2019-01-30	3.2	2.4
2019-01-31	4.2	1.5
2019-02-01	46	26.9
2019-02-02	4.4	4.8
2019-02-03	0	0
2019-02-04	0	0
2019-02-05	0	0
2019-02-06	0	0
2019-02-07	0	0
2019-02-08	0	0
2019-02-09	0	0
2019-02-10	3.6	4.1
2019-02-11	0.2	0.6
2019-02-12	0	0
2019-02-13	0	0
2019-02-14	0.2	0
2019-02-15	0	0
2019-02-16	0	0
2019-02-17	0	0
2019-02-18	0.2	0.1
2019-02-19	0.2	0
2019-02-20	0	0.1
2019-02-21	0.2	0
2019-02-22	0.2	0
2019-02-23	0	0
2019-02-24	0	0
2019-02-25	0.2	0.1
2019-02-26	0.2	0
2019-02-27	0	0
2019-02-28	0	0
2019-03-01	0	0
2019-03-02	0	0
2019-03-03	0	0
2019-03-04	0	0
2019-03-05	0	0
2019-03-06	0	0
2019-03-07	6	3
2019-03-08	0.2	0
2019-03-09	0	0
2019-03-10	0.2	0
2019-03-11	0	0
2019-03-12	0	0
2019-03-13	0	0
2019-03-14	0	0.2
2019-03-15	0	0
2019-03-16	0	0
2019-03-17	0	0
2019-03-18	0	0
2019-03-19	0	0
2019-03-20	0	0
2019-03-21	0.2	0
2019-03-22	0	0
2019-03-23	0	0
2019-03-24	0	0
2019-03-25	0	0
2019-03-26	0	0
2019-03-27	0	0
2019-03-28	0	0
2019-03-29	0	0
2019-03-30	0	0
2019-03-31	0.2	0
2019-04-01	0	0
2019-04-02	0	0
2019-04-03	32.8	23.6
2019-04-04	6.6	6
2019-04-05	0	0
2019-04-06	6.8	6.5
2019-04-07	2.4	2
2019-04-08	0.2	0.1
2019-04-09	0.2	0
2019-04-10	6.8	5.2
2019-04-11	1.2	1
2019-04-12	12.6	12.1
2019-04-13	0.2	0.2
2019-04-14	0	0
2019-04-15	0	0
2019-04-16	2	1.2
2019-04-17	0.2	0.1
2019-04-18	0	0
2019-04-19	0	0
2019-04-20	0	0
2019-04-21	0	0
2019-04-22	1.8	2
2019-04-23	3	2
2019-04-24	46.2	21.7
2019-04-25	4.2	1.1
2019-04-26	14.2	18.4
2019-04-27	0.2	0.2
2019-04-28	0	0
2019-04-29	0	0
2019-04-30	0	0
2019-05-01	0	0
2019-05-02	12.2	4.2
2019-05-03	1.4	1.5
2019-05-04	0	0.1
2019-05-05	0	0
2019-05-06	0	0
2019-05-07	0.2	0
2019-05-08	14	16
2019-05-09	0	0.1
2019-05-10	0	0
2019-05-11	1	0.8
2019-05-12	0.2	0
2019-05-13	0	0
2019-05-14	0	0
2019-05-15	0	0
2019-05-16	0	0
2019-05-17	4	0.9
2019-05-18	6.8	6.6
2019-05-19	13.6	15.6
2019-05-20	7.6	7.4
2019-05-21	0.2	0.1
2019-05-22	3.6	2.2
2019-05-23	0	0.1
2019-05-24	0.2	0
2019-05-25	12	9.4
2019-05-26	0.6	0.3
2019-05-27	10.6	4.5
2019-05-28	0	0
2019-05-29	0	0
2019-05-30	0	0
2019-05-31	0	0
2019-06-01	0	0
2019-06-02	0	0
2019-06-03	0	0
2019-06-04	0	0
2019-06-05	0	0
2019-06-06	0	0
2019-06-07	0	0
2019-06-08	0	0
2019-06-09	0.4	0.5
2019-06-10	33.4	37.7
2019-06-11	3.2	1.4
2019-06-12	0	0.2
2019-06-13	0	0
2019-06-14	0	0
2019-06-15	0	0
2019-06-16	0.2	0
2019-06-17	0	0
2019-06-18	0	0
2019-06-19	0	0
2019-06-20	0	0
2019-06-21	0	0
2019-06-22	6.6	0
2019-06-23	0	0
2019-06-24	0	0
2019-06-25	0	0
2019-06-26	0	0
2019-06-27	0	0
2019-06-28	0	0
2019-06-29	1	0
2019-06-30	6	2.4
2019-07-01	0	0
2019-07-02	0	0
2019-07-03	0.2	1.6
2019-07-04	0	0
2019-07-05	0	0
2019-07-06	0	0
2019-07-07	14.4	4
2019-07-08	0	0
2019-07-09	7.8	6.3
2019-07-10	0	0.1
2019-07-11	0	0
2019-07-12	0	0
2019-07-13	0	0
2019-07-14	29	40.5
2019-07-15	0	0
2019-07-16	0.2	0
2019-07-17	0	0
2019-07-18	0	0
2019-07-19	0	0
2019-07-20	0	0
2019-07-21	0	0
2019-07-22	0	0
2019-07-23	0	0
2019-07-24	1	0.1
2019-07-25	0.2	0
2019-07-26	0	0
2019-07-27	9.2	9.1
2019-07-28	1	0.4
2019-07-29	0	0
2019-07-30	0	0
2019-07-31	0	0
2019-08-01	0	0
2019-08-02	0	0
2019-08-03	0	0
2019-08-04	0	0
2019-08-05	0	0
2019-08-06	0	0
2019-08-07	0	0
2019-08-08	0	0
2019-08-09	0	0
2019-08-10	0	0
2019-08-11	0	0
2019-08-12	12.8	1.9
2019-08-13	0.2	0
2019-08-14	0	0
2019-08-15	0	0
2019-08-16	0	0
2019-08-17	0	0
2019-08-18	0	0
2019-08-19	0	0
2019-08-20	1.4	0
2019-08-21	57.8	6.8
2019-08-22	8.4	6.3
2019-08-23	8	20.1
2019-08-24	3.4	0.9
2019-08-25	0	0
2019-08-26	0.2	0
2019-08-27	0	0
2019-08-28	0	0
2019-08-29	2.2	9.3
2019-08-30	4.4	5.4
2019-08-31	26.4	16.2
2019-09-01	0.2	0.1
2019-09-02	0	0
2019-09-03	0.2	0
2019-09-04	0	0
2019-09-05	0.2	0
2019-09-06	0.6	0.2
2019-09-07	0	0
2019-09-08	0	0
2019-09-09	0.2	0
2019-09-10	8.6	6
2019-09-11	0	0
2019-09-12	0.2	0
2019-09-13	0	0
2019-09-14	0	0
2019-09-15	0.2	0
2019-09-16	0	0
2019-09-17	0	0
2019-09-18	0	0
2019-09-19	1.4	0.7
2019-09-20	0	0
2019-09-21	0.6	0.3
2019-09-22	21.2	16.9
2019-09-23	0.6	0.2
2019-09-24	0.6	0.4
2019-09-25	0.2	0.2
2019-09-26	0	0
2019-09-27	0.2	0
2019-09-28	0	0
2019-09-29	0	0
2019-09-30	0	0
2019-10-01	62.8	43.3
2019-10-02	0.2	0.1
2019-10-03	0	0
2019-10-04	0.2	0.1
2019-10-05	0	0
2019-10-06	1	0.7
2019-10-07	0	0
2019-10-08	0.2	0
2019-10-09	0	0
2019-10-10	0	0
2019-10-11	0	0
2019-10-12	0.2	0.1
2019-10-13	0.2	0.1
2019-10-14	0.2	0.1
2019-10-15	36.6	37.6
2019-10-16	0	0.2
2019-10-17	0.2	0
2019-10-18	2	2.9
2019-10-19	0.8	0.6
2019-10-20	15.2	13.7
2019-10-21	47.8	35.6
2019-10-22	10.6	8.5
2019-10-23	54.4	43.9
2019-10-24	5.2	3.2
2019-10-25	0.2	0.2
2019-10-26	0.2	0.2
2019-10-27	0.2	0.2
2019-10-28	0.2	0.1
2019-10-29	0.2	0.4
2019-10-30	0.2	0.2
2019-10-31	3.2	4.2
2019-11-01	4.4	4.9
2019-11-02	34.4	29.2
2019-11-03	34.8	29.4
2019-11-04	8.6	7.9
2019-11-05	7.6	6.2
2019-11-06	0.6	0.6
2019-11-07	10	8.7
2019-11-08	0	0
2019-11-09	0	0.1
2019-11-10	0	0.1
2019-11-11	2.4	3.6
2019-11-12	0	0.2
2019-11-13	0	0.1
2019-11-14	50	28.5
2019-11-15	6.2	15.1
2019-11-16	2.4	4.5
2019-11-17	0	0.1
2019-11-18	0	0
2019-11-19	7.6	6.6
2019-11-20	1.2	1.7
2019-11-21	0.6	1
2019-11-22	5.6	2.6
2019-11-23	65.6	37.9
2019-11-24	2.2	2.6
2019-11-25	0	0.1
2019-11-26	0	0.2
2019-11-27	19.8	22.7
2019-11-28	2.2	2.2
2019-11-29	0.4	0.3
2019-11-30	0.4	0.4
2019-12-01	24.8	21.5
2019-12-02	0	0.2
2019-12-03	0	0.1
2019-12-04	0.2	0.1
2019-12-05	0	0
2019-12-06	0.2	0
2019-12-07	0	0.1
2019-12-08	0.4	0.4
2019-12-09	0.4	0.9
2019-12-10	0	0
2019-12-11	0	0.4
2019-12-12	0	0
2019-12-13	19.2	18.9
2019-12-14	9.2	12.6
2019-12-15	0.8	0.2
2019-12-16	0	0.1
2019-12-17	0.8	0.1
2019-12-18	0	0
2019-12-19	0.2	0.1
2019-12-20	71.6	61.1
2019-12-21	26	24.2
2019-12-22	7.4	5.7
2019-12-23	1.6	2.5
2019-12-24	0	0.1
2019-12-25	0	0.1
2019-12-26	0	0
2019-12-27	0	0
2019-12-28	0	0.1
2019-12-29	0	0.1
2019-12-30	0	0.1
2019-12-31	0	0

## Sheet: Table S3
Table S3. Chamber-based CO2 accumulation rates obtained with model published by Soulet et al. (2018).
Chamber	Site	Date and time	Repeats (n)	Duration (incl. repeated CO2 accumulations and scrubbings, min)	CO2 accumulation rates (qn, mgC min-1)	Repeat 1	Repeat 2	Repeat 3	Repeat 4	Repeat 5	Repeat 6	Repeat 7	Repeat 8	Repeat 9	Repeat 10	Repeat 11	Repeat 12	Repeat 13	Repeat 14	Repeat 15	Repeat 16	Repeat 17	Repeat 18	Repeat 19	Repeat 20	Repeat 21	Repeat 22	Repeat 23	Repeat 24	Repeat 25	Repeat 26	Repeat 27	Repeat 28	Repeat 29	Repeat 30	Repeat 31	Repeat 32	Repeat 33	Repeat 34	Repeat 35	Repeat 36	Repeat 37	Repeat 38	Repeat 39	Repeat 40	Repeat 41	Repeat 42
M-A-2	Moulin	2018-09-27 08:54:30	10	69		0.00299	0.0024	0.00216	0.00216	0.00191	0.00186	0.00182	0.0018	0.00174	0.00208	#N/A	#N/A	#N/A	#N/A	#N/A	#N/A	#N/A	#N/A	#N/A	#N/A	#N/A	#N/A	#N/A	#N/A	#N/A	#N/A	#N/A	#N/A	#N/A	#N/A	#N/A	#N/A	#N/A	#N/A	#N/A	#N/A	#N/A	#N/A	#N/A	#N/A	#N/A	#N/A
M-B-4	Moulin	2018-09-27 10:10:00	10	74		0.02041	0.01617	0.01526	0.01408	0.01277	0.01263	0.01287	0.01297	0.01229	0.01296	#N/A	#N/A	#N/A	#N/A	#N/A	#N/A	#N/A	#N/A	#N/A	#N/A	#N/A	#N/A	#N/A	#N/A	#N/A	#N/A	#N/A	#N/A	#N/A	#N/A	#N/A	#N/A	#N/A	#N/A	#N/A	#N/A	#N/A	#N/A	#N/A	#N/A	#N/A	#N/A
M-C-1	Moulin	2018-09-27 11:18:00	8	56		0.0318	0.02593	0.0235	0.02196	0.0206	0.01958	0.01872	0.01854	#N/A	#N/A	#N/A	#N/A	#N/A	#N/A	#N/A	#N/A	#N/A	#N/A	#N/A	#N/A	#N/A	#N/A	#N/A	#N/A	#N/A	#N/A	#N/A	#N/A	#N/A	#N/A	#N/A	#N/A	#N/A	#N/A	#N/A	#N/A	#N/A	#N/A	#N/A	#N/A	#N/A	#N/A
M-D-3	Moulin	2018-09-27 12:18:30	8	59		0.01834	0.01457	0.01243	0.01105	0.01032	0.01017	0.00963	0.00947	#N/A	#N/A	#N/A	#N/A	#N/A	#N/A	#N/A	#N/A	#N/A	#N/A	#N/A	#N/A	#N/A	#N/A	#N/A	#N/A	#N/A	#N/A	#N/A	#N/A	#N/A	#N/A	#N/A	#N/A	#N/A	#N/A	#N/A	#N/A	#N/A	#N/A	#N/A	#N/A	#N/A	#N/A
B-F-5	Brusquet	2018-09-27 14:19:00	8	56		0.03145	0.02856	0.02819	0.02401	0.02375	0.02275	0.02098	0.02115	#N/A	#N/A	#N/A	#N/A	#N/A	#N/A	#N/A	#N/A	#N/A	#N/A	#N/A	#N/A	#N/A	#N/A	#N/A	#N/A	#N/A	#N/A	#N/A	#N/A	#N/A	#N/A	#N/A	#N/A	#N/A	#N/A	#N/A	#N/A	#N/A	#N/A	#N/A	#N/A	#N/A	#N/A
B-G-6	Brusquet	2018-09-27 15:21:30	8	61		0.04499	0.03956	0.03712	0.03346	0.03205	0.0315	0.02966	0.02947	#N/A	#N/A	#N/A	#N/A	#N/A	#N/A	#N/A	#N/A	#N/A	#N/A	#N/A	#N/A	#N/A	#N/A	#N/A	#N/A	#N/A	#N/A	#N/A	#N/A	#N/A	#N/A	#N/A	#N/A	#N/A	#N/A	#N/A	#N/A	#N/A	#N/A	#N/A	#N/A	#N/A	#N/A
B-H-7	Brusquet	2018-09-27 16:26:00	8	60		0.03741	0.03407	0.03084	0.03026	0.02915	0.02761	0.02747	0.02616	#N/A	#N/A	#N/A	#N/A	#N/A	#N/A	#N/A	#N/A	#N/A	#N/A	#N/A	#N/A	#N/A	#N/A	#N/A	#N/A	#N/A	#N/A	#N/A	#N/A	#N/A	#N/A	#N/A	#N/A	#N/A	#N/A	#N/A	#N/A	#N/A	#N/A	#N/A	#N/A	#N/A	#N/A
B-I-8	Brusquet	2018-09-27 17:25:00	8	56		0.03301	0.02817	0.02559	0.02461	0.02316	0.02124	0.02147	0.02152	#N/A	#N/A	#N/A	#N/A	#N/A	#N/A	#N/A	#N/A	#N/A	#N/A	#N/A	#N/A	#N/A	#N/A	#N/A	#N/A	#N/A	#N/A	#N/A	#N/A	#N/A	#N/A	#N/A	#N/A	#N/A	#N/A	#N/A	#N/A	#N/A	#N/A	#N/A	#N/A	#N/A	#N/A
M-C-1	Moulin	2019-01-11 11:57:00	3	66		0.00133	0.00115	0.00097	#N/A	#N/A	#N/A	#N/A	#N/A	#N/A	#N/A	#N/A	#N/A	#N/A	#N/A	#N/A	#N/A	#N/A	#N/A	#N/A	#N/A	#N/A	#N/A	#N/A	#N/A	#N/A	#N/A	#N/A	#N/A	#N/A	#N/A	#N/A	#N/A	#N/A	#N/A	#N/A	#N/A	#N/A	#N/A	#N/A	#N/A	#N/A	#N/A
M-D-3	Moulin	2019-01-11 13:11:00	3	72		0.0007	0.00058	0.0005	#N/A	#N/A	#N/A	#N/A	#N/A	#N/A	#N/A	#N/A	#N/A	#N/A	#N/A	#N/A	#N/A	#N/A	#N/A	#N/A	#N/A	#N/A	#N/A	#N/A	#N/A	#N/A	#N/A	#N/A	#N/A	#N/A	#N/A	#N/A	#N/A	#N/A	#N/A	#N/A	#N/A	#N/A	#N/A	#N/A	#N/A	#N/A	#N/A
M-B-4	Moulin	2019-01-11 14:24:00	9	72		0.0041	0.00364	0.00354	0.00289	0.00286	0.00293	0.00246	0.00213	0.00251	#N/A	#N/A	#N/A	#N/A	#N/A	#N/A	#N/A	#N/A	#N/A	#N/A	#N/A	#N/A	#N/A	#N/A	#N/A	#N/A	#N/A	#N/A	#N/A	#N/A	#N/A	#N/A	#N/A	#N/A	#N/A	#N/A	#N/A	#N/A	#N/A	#N/A	#N/A	#N/A	#N/A
M-A-2	Moulin	2019-01-11 15:39:00	9	76		0.00172	0.00179	0.00181	0.00175	0.00169	0.00171	0.00169	0.00185	0.00177	#N/A	#N/A	#N/A	#N/A	#N/A	#N/A	#N/A	#N/A	#N/A	#N/A	#N/A	#N/A	#N/A	#N/A	#N/A	#N/A	#N/A	#N/A	#N/A	#N/A	#N/A	#N/A	#N/A	#N/A	#N/A	#N/A	#N/A	#N/A	#N/A	#N/A	#N/A	#N/A	#N/A
B-F-5	Brusquet	2019-01-12 11:05:30	9	71		0.00216	0.00144	0.00147	0.00133	0.00141	0.00142	0.00136	0.00111	0.00135	#N/A	#N/A	#N/A	#N/A	#N/A	#N/A	#N/A	#N/A	#N/A	#N/A	#N/A	#N/A	#N/A	#N/A	#N/A	#N/A	#N/A	#N/A	#N/A	#N/A	#N/A	#N/A	#N/A	#N/A	#N/A	#N/A	#N/A	#N/A	#N/A	#N/A	#N/A	#N/A	#N/A
B-G-6	Brusquet	2019-01-12 12:17:00	9	64		0.00641	0.00464	0.00469	0.00407	0.00362	0.00381	0.0039	0.00342	0.00303	#N/A	#N/A	#N/A	#N/A	#N/A	#N/A	#N/A	#N/A	#N/A	#N/A	#N/A	#N/A	#N/A	#N/A	#N/A	#N/A	#N/A	#N/A	#N/A	#N/A	#N/A	#N/A	#N/A	#N/A	#N/A	#N/A	#N/A	#N/A	#N/A	#N/A	#N/A	#N/A	#N/A
B-H-7	Brusquet	2019-01-12 13:24:00	9	62		0.00478	0.00351	0.00343	0.00333	0.00309	0.00302	0.00287	0.00301	0.00293	#N/A	#N/A	#N/A	#N/A	#N/A	#N/A	#N/A	#N/A	#N/A	#N/A	#N/A	#N/A	#N/A	#N/A	#N/A	#N/A	#N/A	#N/A	#N/A	#N/A	#N/A	#N/A	#N/A	#N/A	#N/A	#N/A	#N/A	#N/A	#N/A	#N/A	#N/A	#N/A	#N/A
B-I-8	Brusquet	2019-01-12 14:33:30	9	69		0.00436	0.00357	0.00314	0.0029	0.00312	0.00315	0.00264	0.00249	0.00276	#N/A	#N/A	#N/A	#N/A	#N/A	#N/A	#N/A	#N/A	#N/A	#N/A	#N/A	#N/A	#N/A	#N/A	#N/A	#N/A	#N/A	#N/A	#N/A	#N/A	#N/A	#N/A	#N/A	#N/A	#N/A	#N/A	#N/A	#N/A	#N/A	#N/A	#N/A	#N/A	#N/A
B-F-5	Brusquet	2019-01-12 15:45:30	9	67		0.0049	0.00525	0.00414	0.00517	0.00432	0.00415	0.00375	0.00387	0.00411	#N/A	#N/A	#N/A	#N/A	#N/A	#N/A	#N/A	#N/A	#N/A	#N/A	#N/A	#N/A	#N/A	#N/A	#N/A	#N/A	#N/A	#N/A	#N/A	#N/A	#N/A	#N/A	#N/A	#N/A	#N/A	#N/A	#N/A	#N/A	#N/A	#N/A	#N/A	#N/A	#N/A
M-B-4	Moulin	2019-01-13 12:36:30	42	343		0.00421	0.00355	0.00306	0.00289	0.00297	0.00287	0.00324	0.00275	0.00269	0.00256	0.00263	0.00263	0.00256	0.00234	0.00223	0.00249	0.00271	0.00241	0.00237	0.00232	0.0023	0.00188	0.00188	0.00224	0.00216	0.00235	0.00195	0.00222	0.00234	0.0022	0.00221	0.00218	0.00215	0.00233	0.00226	0.00245	0.00235	0.00225	0.00216	0.00242	0.00243	0.00249
B-F-5	Brusquet	2019-01-14 10:19:30	6	43		0.00364	0.00335	0.00318	0.00323	0.00311	0.00271	#N/A	#N/A	#N/A	#N/A	#N/A	#N/A	#N/A	#N/A	#N/A	#N/A	#N/A	#N/A	#N/A	#N/A	#N/A	#N/A	#N/A	#N/A	#N/A	#N/A	#N/A	#N/A	#N/A	#N/A	#N/A	#N/A	#N/A	#N/A	#N/A	#N/A	#N/A	#N/A	#N/A	#N/A	#N/A	#N/A
B-G-6	Brusquet	2019-01-14 13:07:30	38	283		0.01282	0.00607	0.00537	0.00511	0.00444	0.0047	0.0045	0.00466	0.00441	0.00441	0.00389	0.00394	0.00383	0.00363	0.00364	0.0037	0.00391	0.00351	0.00344	0.00366	0.00342	0.00334	0.00329	0.00331	0.0035	0.00364	0.00369	0.00344	0.00346	0.00337	0.00359	0.00323	0.00342	0.00348	0.00349	0.00323	0.00351	0.00344	#N/A	#N/A	#N/A	#N/A
B-F-5	Brusquet	2019-01-14 16:55:00	6	42		0.00784	0.00755	0.00705	0.00627	0.0056	0.0059	#N/A	#N/A	#N/A	#N/A	#N/A	#N/A	#N/A	#N/A	#N/A	#N/A	#N/A	#N/A	#N/A	#N/A	#N/A	#N/A	#N/A	#N/A	#N/A	#N/A	#N/A	#N/A	#N/A	#N/A	#N/A	#N/A	#N/A	#N/A	#N/A	#N/A	#N/A	#N/A	#N/A	#N/A	#N/A	#N/A
M-C-1	Moulin	2019-04-11 10:26:00	9	90		0.00289	0.00248	0.00212	0.00206	0.00148	0.00133	0.00107	0.00153	0.00131	#N/A	#N/A	#N/A	#N/A	#N/A	#N/A	#N/A	#N/A	#N/A	#N/A	#N/A	#N/A	#N/A	#N/A	#N/A	#N/A	#N/A	#N/A	#N/A	#N/A	#N/A	#N/A	#N/A	#N/A	#N/A	#N/A	#N/A	#N/A	#N/A	#N/A	#N/A	#N/A	#N/A
M-D-3	Moulin	2019-04-11 11:53:30	7	73		0.00103	0.00083	0.00083	0.00081	0.00071	0.00093	0.00089	#N/A	#N/A	#N/A	#N/A	#N/A	#N/A	#N/A	#N/A	#N/A	#N/A	#N/A	#N/A	#N/A	#N/A	#N/A	#N/A	#N/A	#N/A	#N/A	#N/A	#N/A	#N/A	#N/A	#N/A	#N/A	#N/A	#N/A	#N/A	#N/A	#N/A	#N/A	#N/A	#N/A	#N/A	#N/A
M-A-2	Moulin	2019-04-11 13:12:00	7	70		0.00179	0.00163	0.00162	0.00142	0.00137	0.00113	0.0011	#N/A	#N/A	#N/A	#N/A	#N/A	#N/A	#N/A	#N/A	#N/A	#N/A	#N/A	#N/A	#N/A	#N/A	#N/A	#N/A	#N/A	#N/A	#N/A	#N/A	#N/A	#N/A	#N/A	#N/A	#N/A	#N/A	#N/A	#N/A	#N/A	#N/A	#N/A	#N/A	#N/A	#N/A	#N/A
M-B-4	Moulin	2019-04-11 14:45:30	10	105		0.0055	0.00391	0.0028	0.00277	0.00295	0.00167	0.00178	0.00164	0.0015	0.00122	#N/A	#N/A	#N/A	#N/A	#N/A	#N/A	#N/A	#N/A	#N/A	#N/A	#N/A	#N/A	#N/A	#N/A	#N/A	#N/A	#N/A	#N/A	#N/A	#N/A	#N/A	#N/A	#N/A	#N/A	#N/A	#N/A	#N/A	#N/A	#N/A	#N/A	#N/A	#N/A
B-F-5	Brusquet	2019-04-12 09:26:30	9	91		0.00219	0.00184	0.0017	0.00147	0.00137	0.00131	0.00106	0.0012	0.00111	#N/A	#N/A	#N/A	#N/A	#N/A	#N/A	#N/A	#N/A	#N/A	#N/A	#N/A	#N/A	#N/A	#N/A	#N/A	#N/A	#N/A	#N/A	#N/A	#N/A	#N/A	#N/A	#N/A	#N/A	#N/A	#N/A	#N/A	#N/A	#N/A	#N/A	#N/A	#N/A	#N/A
B-G-6	Brusquet	2019-04-12 10:57:00	9	78		0.01084	0.0083	0.00795	0.00781	0.00723	0.00733	0.00639	0.0062	0.00619	#N/A	#N/A	#N/A	#N/A	#N/A	#N/A	#N/A	#N/A	#N/A	#N/A	#N/A	#N/A	#N/A	#N/A	#N/A	#N/A	#N/A	#N/A	#N/A	#N/A	#N/A	#N/A	#N/A	#N/A	#N/A	#N/A	#N/A	#N/A	#N/A	#N/A	#N/A	#N/A	#N/A
B-H-7	Brusquet	2019-04-12 12:24:00	9	86		0.00432	0.003	0.0024	0.00235	0.00224	0.00191	0.00186	0.00186	0.00167	#N/A	#N/A	#N/A	#N/A	#N/A	#N/A	#N/A	#N/A	#N/A	#N/A	#N/A	#N/A	#N/A	#N/A	#N/A	#N/A	#N/A	#N/A	#N/A	#N/A	#N/A	#N/A	#N/A	#N/A	#N/A	#N/A	#N/A	#N/A	#N/A	#N/A	#N/A	#N/A	#N/A
B-I-8	Brusquet	2019-04-12 13:57:00	8	86		0.007	0.00572	0.00537	0.00516	0.00462	0.00452	0.00401	0.00413	#N/A	#N/A	#N/A	#N/A	#N/A	#N/A	#N/A	#N/A	#N/A	#N/A	#N/A	#N/A	#N/A	#N/A	#N/A	#N/A	#N/A	#N/A	#N/A	#N/A	#N/A	#N/A	#N/A	#N/A	#N/A	#N/A	#N/A	#N/A	#N/A	#N/A	#N/A	#N/A	#N/A	#N/A
M-B-4	Moulin	2019-04-13 11:54:30	31	405		0.00427	0.00334	0.00235	0.00185	0.00171	0.00144	0.0015	0.00086	0.00087	0.00113	0.0012	0.00077	0.00089	0.00049	0.00068	0.001	0.00079	0.00076	0.00094	0.00063	0.00052	0.00071	0.00062	0.00092	0.00054	0.00082	0.00061	0.00081	0.00069	0.00062	0.00075	#N/A	#N/A	#N/A	#N/A	#N/A	#N/A	#N/A	#N/A	#N/A	#N/A	#N/A
M-B-4	Moulin	2019-04-14 10:24:30	10	131		0.00362	0.00232	0.0015	0.00146	0.00121	0.00103	0.00117	0.00108	0.00078	0.00071	#N/A	#N/A	#N/A	#N/A	#N/A	#N/A	#N/A	#N/A	#N/A	#N/A	#N/A	#N/A	#N/A	#N/A	#N/A	#N/A	#N/A	#N/A	#N/A	#N/A	#N/A	#N/A	#N/A	#N/A	#N/A	#N/A	#N/A	#N/A	#N/A	#N/A	#N/A	#N/A
B-G-6	Brusquet	2019-04-14 14:36:00	10	100		0.00619	0.00451	0.00352	0.00341	0.00306	0.00255	0.00282	0.00254	0.00227	0.00216	#N/A	#N/A	#N/A	#N/A	#N/A	#N/A	#N/A	#N/A	#N/A	#N/A	#N/A	#N/A	#N/A	#N/A	#N/A	#N/A	#N/A	#N/A	#N/A	#N/A	#N/A	#N/A	#N/A	#N/A	#N/A	#N/A	#N/A	#N/A	#N/A	#N/A	#N/A	#N/A
B-G-6	Brusquet	2019-04-15 10:32:30	26	267		0.00741	0.00405	0.00388	0.00371	0.00306	0.00272	0.00272	0.00245	0.00232	0.00206	0.00223	0.00144	0.00197	0.00185	0.00221	0.00186	0.00205	0.00203	0.00167	0.00144	0.00216	0.00185	0.0019	0.00169	0.00187	0.00192	#N/A	#N/A	#N/A	#N/A	#N/A	#N/A	#N/A	#N/A	#N/A	#N/A	#N/A	#N/A	#N/A	#N/A	#N/A	#N/A
M-B-4	Moulin	2019-04-15 14:59:00	9	94		0.00514	0.00349	0.00306	0.00264	0.00263	0.00249	0.00226	0.00185	0.00178	#N/A	#N/A	#N/A	#N/A	#N/A	#N/A	#N/A	#N/A	#N/A	#N/A	#N/A	#N/A	#N/A	#N/A	#N/A	#N/A	#N/A	#N/A	#N/A	#N/A	#N/A	#N/A	#N/A	#N/A	#N/A	#N/A	#N/A	#N/A	#N/A	#N/A	#N/A	#N/A	#N/A
M-C-1	Moulin	2019-05-27 13:16:00	18	178		0.00698	0.00516	0.00387	0.00409	0.00331	0.00345	0.0026	0.003	0.00254	0.00234	0.00273	0.00267	0.00253	0.00266	0.00208	0.00198	0.00241	0.00209	#N/A	#N/A	#N/A	#N/A	#N/A	#N/A	#N/A	#N/A	#N/A	#N/A	#N/A	#N/A	#N/A	#N/A	#N/A	#N/A	#N/A	#N/A	#N/A	#N/A	#N/A	#N/A	#N/A	#N/A
M-B-4	Moulin	2019-05-27 15:25:00	8	60		0.01219	0.00716	0.00595	0.00453	0.0044	0.00407	0.00356	0.00329	#N/A	#N/A	#N/A	#N/A	#N/A	#N/A	#N/A	#N/A	#N/A	#N/A	#N/A	#N/A	#N/A	#N/A	#N/A	#N/A	#N/A	#N/A	#N/A	#N/A	#N/A	#N/A	#N/A	#N/A	#N/A	#N/A	#N/A	#N/A	#N/A	#N/A	#N/A	#N/A	#N/A	#N/A
B-G-6	Brusquet	2019-05-29 09:13:30	15	117		0.01766	0.01253	0.0114	0.00985	0.00904	0.00884	0.00783	0.0073	0.00727	0.00733	0.0069	0.00671	0.00687	0.00682	0.0068	#N/A	#N/A	#N/A	#N/A	#N/A	#N/A	#N/A	#N/A	#N/A	#N/A	#N/A	#N/A	#N/A	#N/A	#N/A	#N/A	#N/A	#N/A	#N/A	#N/A	#N/A	#N/A	#N/A	#N/A	#N/A	#N/A	#N/A
B-F-5	Brusquet	2019-05-29 10:30:00	4	26		0.00371	0.00308	0.00274	0.00222	#N/A	#N/A	#N/A	#N/A	#N/A	#N/A	#N/A	#N/A	#N/A	#N/A	#N/A	#N/A	#N/A	#N/A	#N/A	#N/A	#N/A	#N/A	#N/A	#N/A	#N/A	#N/A	#N/A	#N/A	#N/A	#N/A	#N/A	#N/A	#N/A	#N/A	#N/A	#N/A	#N/A	#N/A	#N/A	#N/A	#N/A	#N/A
B-F-5	Brusquet	2019-07-05 08:04:00	10	84		0.02587	0.02197	0.01964	0.01783	0.01638	0.01578	0.01469	0.01448	0.0136	0.01285	#N/A	#N/A	#N/A	#N/A	#N/A	#N/A	#N/A	#N/A	#N/A	#N/A	#N/A	#N/A	#N/A	#N/A	#N/A	#N/A	#N/A	#N/A	#N/A	#N/A	#N/A	#N/A	#N/A	#N/A	#N/A	#N/A	#N/A	#N/A	#N/A	#N/A	#N/A	#N/A
B-G-6	Brusquet	2019-07-05 09:36:00	10	88		0.06355	0.0516	0.04562	0.04444	0.04177	0.04005	0.03796	0.0366	0.03556	0.03404	#N/A	#N/A	#N/A	#N/A	#N/A	#N/A	#N/A	#N/A	#N/A	#N/A	#N/A	#N/A	#N/A	#N/A	#N/A	#N/A	#N/A	#N/A	#N/A	#N/A	#N/A	#N/A	#N/A	#N/A	#N/A	#N/A	#N/A	#N/A	#N/A	#N/A	#N/A	#N/A
B-H-7	Brusquet	2019-07-05 11:07:00	10	84		0.04019	0.03345	0.02853	0.02623	0.02445	0.02228	0.02037	0.02057	0.02034	0.01841	#N/A	#N/A	#N/A	#N/A	#N/A	#N/A	#N/A	#N/A	#N/A	#N/A	#N/A	#N/A	#N/A	#N/A	#N/A	#N/A	#N/A	#N/A	#N/A	#N/A	#N/A	#N/A	#N/A	#N/A	#N/A	#N/A	#N/A	#N/A	#N/A	#N/A	#N/A	#N/A
B-I-8	Brusquet	2019-07-05 12:37:00	10	86		0.03306	0.02616	0.02303	0.02138	0.0205	0.02048	0.01938	0.01879	0.01789	0.01775	#N/A	#N/A	#N/A	#N/A	#N/A	#N/A	#N/A	#N/A	#N/A	#N/A	#N/A	#N/A	#N/A	#N/A	#N/A	#N/A	#N/A	#N/A	#N/A	#N/A	#N/A	#N/A	#N/A	#N/A	#N/A	#N/A	#N/A	#N/A	#N/A	#N/A	#N/A	#N/A
M-C-1	Moulin	2019-07-06 07:52:30	10	89		0.03913	0.03186	0.02645	0.02421	0.02093	0.02044	0.0201	0.01823	0.01703	0.01899	#N/A	#N/A	#N/A	#N/A	#N/A	#N/A	#N/A	#N/A	#N/A	#N/A	#N/A	#N/A	#N/A	#N/A	#N/A	#N/A	#N/A	#N/A	#N/A	#N/A	#N/A	#N/A	#N/A	#N/A	#N/A	#N/A	#N/A	#N/A	#N/A	#N/A	#N/A	#N/A
M-D-3	Moulin	2019-07-06 09:28:30	10	93		0.01637	0.01298	0.01056	0.00918	0.00826	0.00767	0.00733	0.00674	0.00703	0.00642	#N/A	#N/A	#N/A	#N/A	#N/A	#N/A	#N/A	#N/A	#N/A	#N/A	#N/A	#N/A	#N/A	#N/A	#N/A	#N/A	#N/A	#N/A	#N/A	#N/A	#N/A	#N/A	#N/A	#N/A	#N/A	#N/A	#N/A	#N/A	#N/A	#N/A	#N/A	#N/A
M-A-2	Moulin	2019-07-06 11:01:00	10	82		0.01328	0.01166	0.01108	0.01006	0.01002	0.00949	0.00973	0.00966	0.00926	0.00964	#N/A	#N/A	#N/A	#N/A	#N/A	#N/A	#N/A	#N/A	#N/A	#N/A	#N/A	#N/A	#N/A	#N/A	#N/A	#N/A	#N/A	#N/A	#N/A	#N/A	#N/A	#N/A	#N/A	#N/A	#N/A	#N/A	#N/A	#N/A	#N/A	#N/A	#N/A	#N/A
M-B-4	Moulin	2019-07-06 12:28:30	9	83		0.04495	0.03518	0.03106	0.02883	0.02681	0.02579	0.02464	0.02409	0.02224	#N/A	#N/A	#N/A	#N/A	#N/A	#N/A	#N/A	#N/A	#N/A	#N/A	#N/A	#N/A	#N/A	#N/A	#N/A	#N/A	#N/A	#N/A	#N/A	#N/A	#N/A	#N/A	#N/A	#N/A	#N/A	#N/A	#N/A	#N/A	#N/A	#N/A	#N/A	#N/A	#N/A
B-I-8	Brusquet	2019-07-07 06:14:00	9	76		0.04149	0.03285	0.0287	0.02693	0.02503	0.02417	0.02311	0.02247	0.02074	#N/A	#N/A	#N/A	#N/A	#N/A	#N/A	#N/A	#N/A	#N/A	#N/A	#N/A	#N/A	#N/A	#N/A	#N/A	#N/A	#N/A	#N/A	#N/A	#N/A	#N/A	#N/A	#N/A	#N/A	#N/A	#N/A	#N/A	#N/A	#N/A	#N/A	#N/A	#N/A	#N/A
B-G-6	Brusquet	2019-07-07 09:07:00	10	94		0.0731	0.05497	0.05117	0.0508	0.04626	0.04371	0.042	0.04094	0.03864	0.03856	#N/A	#N/A	#N/A	#N/A	#N/A	#N/A	#N/A	#N/A	#N/A	#N/A	#N/A	#N/A	#N/A	#N/A	#N/A	#N/A	#N/A	#N/A	#N/A	#N/A	#N/A	#N/A	#N/A	#N/A	#N/A	#N/A	#N/A	#N/A	#N/A	#N/A	#N/A	#N/A
B-F-5	Brusquet	2019-07-07 10:46:00	10	86		0.02766	0.02297	0.02111	0.01847	0.01737	0.01567	0.01596	0.01502	0.0144	0.01453	#N/A	#N/A	#N/A	#N/A	#N/A	#N/A	#N/A	#N/A	#N/A	#N/A	#N/A	#N/A	#N/A	#N/A	#N/A	#N/A	#N/A	#N/A	#N/A	#N/A	#N/A	#N/A	#N/A	#N/A	#N/A	#N/A	#N/A	#N/A	#N/A	#N/A	#N/A	#N/A
M-B-4	Moulin	2019-07-08 07:09:00	14	132		0.03199	0.02697	0.02306	0.02131	0.01888	0.01866	0.01847	0.01781	0.01731	0.01729	0.01653	0.01572	0.01526	0.01476	#N/A	#N/A	#N/A	#N/A	#N/A	#N/A	#N/A	#N/A	#N/A	#N/A	#N/A	#N/A	#N/A	#N/A	#N/A	#N/A	#N/A	#N/A	#N/A	#N/A	#N/A	#N/A	#N/A	#N/A	#N/A	#N/A	#N/A	#N/A
M-D-3	Moulin	2019-07-08 09:09:00	8	88		0.0134	0.00953	0.00771	0.00673	0.00605	0.00524	0.00496	0.00483	#N/A	#N/A	#N/A	#N/A	#N/A	#N/A	#N/A	#N/A	#N/A	#N/A	#N/A	#N/A	#N/A	#N/A	#N/A	#N/A	#N/A	#N/A	#N/A	#N/A	#N/A	#N/A	#N/A	#N/A	#N/A	#N/A	#N/A	#N/A	#N/A	#N/A	#N/A	#N/A	#N/A	#N/A
M-A-2	Moulin	2019-07-08 10:31:30	8	67		0.01008	0.00914	0.00849	0.00787	0.0074	0.00729	0.00707	0.00741	#N/A	#N/A	#N/A	#N/A	#N/A	#N/A	#N/A	#N/A	#N/A	#N/A	#N/A	#N/A	#N/A	#N/A	#N/A	#N/A	#N/A	#N/A	#N/A	#N/A	#N/A	#N/A	#N/A	#N/A	#N/A	#N/A	#N/A	#N/A	#N/A	#N/A	#N/A	#N/A	#N/A	#N/A
M-C-1	Moulin	2019-07-08 11:57:30	10	87		0.04115	0.03144	0.02798	0.02565	0.0221	0.0232	0.0217	0.02195	0.02128	0.02018	#N/A	#N/A	#N/A	#N/A	#N/A	#N/A	#N/A	#N/A	#N/A	#N/A	#N/A	#N/A	#N/A	#N/A	#N/A	#N/A	#N/A	#N/A	#N/A	#N/A	#N/A	#N/A	#N/A	#N/A	#N/A	#N/A	#N/A	#N/A	#N/A	#N/A	#N/A	#N/A
M-B-4	Moulin	2019-07-10 09:05:00	16	144		0.03129	0.02241	0.01989	0.01895	0.01684	0.01658	0.01538	0.01466	0.01408	0.01388	0.01362	0.01345	0.01257	0.01248	0.01255	0.01254	#N/A	#N/A	#N/A	#N/A	#N/A	#N/A	#N/A	#N/A	#N/A	#N/A	#N/A	#N/A	#N/A	#N/A	#N/A	#N/A	#N/A	#N/A	#N/A	#N/A	#N/A	#N/A	#N/A	#N/A	#N/A	#N/A
M-C-1	Moulin	2019-07-10 11:06:30	10	87		0.03403	0.02751	0.02296	0.02137	0.02039	0.01866	0.01773	0.01812	0.01775	0.0169	#N/A	#N/A	#N/A	#N/A	#N/A	#N/A	#N/A	#N/A	#N/A	#N/A	#N/A	#N/A	#N/A	#N/A	#N/A	#N/A	#N/A	#N/A	#N/A	#N/A	#N/A	#N/A	#N/A	#N/A	#N/A	#N/A	#N/A	#N/A	#N/A	#N/A	#N/A	#N/A
M-B-4	Moulin	2019-07-11 07:53:30	10	85		0.03562	0.02795	0.02391	0.02152	0.02031	0.01864	0.01836	0.01696	0.01641	0.01586	#N/A	#N/A	#N/A	#N/A	#N/A	#N/A	#N/A	#N/A	#N/A	#N/A	#N/A	#N/A	#N/A	#N/A	#N/A	#N/A	#N/A	#N/A	#N/A	#N/A	#N/A	#N/A	#N/A	#N/A	#N/A	#N/A	#N/A	#N/A	#N/A	#N/A	#N/A	#N/A
M-C-1	Moulin	2019-07-11 09:27:30	10	89		0.03467	0.02619	0.023	0.0212	0.01961	0.01928	0.01793	0.01742	0.01732	0.01677	#N/A	#N/A	#N/A	#N/A	#N/A	#N/A	#N/A	#N/A	#N/A	#N/A	#N/A	#N/A	#N/A	#N/A	#N/A	#N/A	#N/A	#N/A	#N/A	#N/A	#N/A	#N/A	#N/A	#N/A	#N/A	#N/A	#N/A	#N/A	#N/A	#N/A	#N/A	#N/A
B-G-6	Brusquet	2019-07-12 13:56:00	8	92		0.05181	0.04679	0.04278	0.0374	0.03752	0.03758	0.03671	0.03555	#N/A	#N/A	#N/A	#N/A	#N/A	#N/A	#N/A	#N/A	#N/A	#N/A	#N/A	#N/A	#N/A	#N/A	#N/A	#N/A	#N/A	#N/A	#N/A	#N/A	#N/A	#N/A	#N/A	#N/A	#N/A	#N/A	#N/A	#N/A	#N/A	#N/A	#N/A	#N/A	#N/A	#N/A
B-I-8	Brusquet	2019-07-12 15:27:00	8	74		0.03689	0.02954	0.02668	0.02569	0.02293	0.02139	0.02151	0.02057	#N/A	#N/A	#N/A	#N/A	#N/A	#N/A	#N/A	#N/A	#N/A	#N/A	#N/A	#N/A	#N/A	#N/A	#N/A	#N/A	#N/A	#N/A	#N/A	#N/A	#N/A	#N/A	#N/A	#N/A	#N/A	#N/A	#N/A	#N/A	#N/A	#N/A	#N/A	#N/A	#N/A	#N/A
M-B-4	Moulin	2019-07-12 18:17:30	8	69		0.05266	0.04178	0.0358	0.03225	0.03176	0.02973	0.02909	0.02754	#N/A	#N/A	#N/A	#N/A	#N/A	#N/A	#N/A	#N/A	#N/A	#N/A	#N/A	#N/A	#N/A	#N/A	#N/A	#N/A	#N/A	#N/A	#N/A	#N/A	#N/A	#N/A	#N/A	#N/A	#N/A	#N/A	#N/A	#N/A	#N/A	#N/A	#N/A	#N/A	#N/A	#N/A
B-G-6	Brusquet	2019-09-27 15:05:00	10	88		0.04335	0.03521	0.03223	0.03033	0.02822	0.0275	0.02679	0.02603	0.02505	0.02452	#N/A	#N/A	#N/A	#N/A	#N/A	#N/A	#N/A	#N/A	#N/A	#N/A	#N/A	#N/A	#N/A	#N/A	#N/A	#N/A	#N/A	#N/A	#N/A	#N/A	#N/A	#N/A	#N/A	#N/A	#N/A	#N/A	#N/A	#N/A	#N/A	#N/A	#N/A	#N/A
B-I-8	Brusquet	2019-09-27 16:37:30	10	87		0.02984	0.02505	0.02245	0.02057	0.01992	0.01924	0.01868	0.01773	0.0177	0.01701	#N/A	#N/A	#N/A	#N/A	#N/A	#N/A	#N/A	#N/A	#N/A	#N/A	#N/A	#N/A	#N/A	#N/A	#N/A	#N/A	#N/A	#N/A	#N/A	#N/A	#N/A	#N/A	#N/A	#N/A	#N/A	#N/A	#N/A	#N/A	#N/A	#N/A	#N/A	#N/A
B-G-6	Brusquet	2019-09-27 17:35:00	2	22		0.03997	0.03398	#N/A	#N/A	#N/A	#N/A	#N/A	#N/A	#N/A	#N/A	#N/A	#N/A	#N/A	#N/A	#N/A	#N/A	#N/A	#N/A	#N/A	#N/A	#N/A	#N/A	#N/A	#N/A	#N/A	#N/A	#N/A	#N/A	#N/A	#N/A	#N/A	#N/A	#N/A	#N/A	#N/A	#N/A	#N/A	#N/A	#N/A	#N/A	#N/A	#N/A
B-F-5	Brusquet	2019-09-28 10:20:00	8	76		0.01141	0.01059	0.00984	0.00892	0.0087	0.00828	0.00824	0.00756	#N/A	#N/A	#N/A	#N/A	#N/A	#N/A	#N/A	#N/A	#N/A	#N/A	#N/A	#N/A	#N/A	#N/A	#N/A	#N/A	#N/A	#N/A	#N/A	#N/A	#N/A	#N/A	#N/A	#N/A	#N/A	#N/A	#N/A	#N/A	#N/A	#N/A	#N/A	#N/A	#N/A	#N/A
B-G-6	Brusquet	2019-09-28 11:50:00	11	96		0.04165	0.03442	0.03089	0.02883	0.02749	0.02557	0.02413	0.02363	0.02284	0.02223	0.02186	#N/A	#N/A	#N/A	#N/A	#N/A	#N/A	#N/A	#N/A	#N/A	#N/A	#N/A	#N/A	#N/A	#N/A	#N/A	#N/A	#N/A	#N/A	#N/A	#N/A	#N/A	#N/A	#N/A	#N/A	#N/A	#N/A	#N/A	#N/A	#N/A	#N/A	#N/A
B-I-8	Brusquet	2019-09-28 14:06:00	18	164		0.02178	0.0186	0.0171	0.01507	0.01394	0.01354	0.0129	0.01328	0.01249	0.01252	0.01267	0.0126	0.01249	0.01245	0.01255	0.01266	0.01263	0.01254	#N/A	#N/A	#N/A	#N/A	#N/A	#N/A	#N/A	#N/A	#N/A	#N/A	#N/A	#N/A	#N/A	#N/A	#N/A	#N/A	#N/A	#N/A	#N/A	#N/A	#N/A	#N/A	#N/A	#N/A
B-H-7	Brusquet	2019-09-28 16:06:30	7	69		0.02676	0.02266	0.02042	0.01884	0.01762	0.01702	0.01623	#N/A	#N/A	#N/A	#N/A	#N/A	#N/A	#N/A	#N/A	#N/A	#N/A	#N/A	#N/A	#N/A	#N/A	#N/A	#N/A	#N/A	#N/A	#N/A	#N/A	#N/A	#N/A	#N/A	#N/A	#N/A	#N/A	#N/A	#N/A	#N/A	#N/A	#N/A	#N/A	#N/A	#N/A	#N/A
M-B-4	Moulin	2019-09-29 09:52:30	10	85		0.03266	0.02703	0.02347	0.02149	0.02052	0.01886	0.01836	0.01738	0.01696	0.01645	#N/A	#N/A	#N/A	#N/A	#N/A	#N/A	#N/A	#N/A	#N/A	#N/A	#N/A	#N/A	#N/A	#N/A	#N/A	#N/A	#N/A	#N/A	#N/A	#N/A	#N/A	#N/A	#N/A	#N/A	#N/A	#N/A	#N/A	#N/A	#N/A	#N/A	#N/A	#N/A
M-A-2	Moulin	2019-09-29 11:12:30	8	67		0.01092	0.00997	0.00926	0.00891	0.00851	0.00883	0.00893	0.00907	#N/A	#N/A	#N/A	#N/A	#N/A	#N/A	#N/A	#N/A	#N/A	#N/A	#N/A	#N/A	#N/A	#N/A	#N/A	#N/A	#N/A	#N/A	#N/A	#N/A	#N/A	#N/A	#N/A	#N/A	#N/A	#N/A	#N/A	#N/A	#N/A	#N/A	#N/A	#N/A	#N/A	#N/A
M-D-3	Moulin	2019-09-29 12:32:00	8	82		0.01237	0.00946	0.00846	0.00746	0.007	0.00684	0.00547	0.00618	#N/A	#N/A	#N/A	#N/A	#N/A	#N/A	#N/A	#N/A	#N/A	#N/A	#N/A	#N/A	#N/A	#N/A	#N/A	#N/A	#N/A	#N/A	#N/A	#N/A	#N/A	#N/A	#N/A	#N/A	#N/A	#N/A	#N/A	#N/A	#N/A	#N/A	#N/A	#N/A	#N/A	#N/A
M-C-1	Moulin	2019-09-29 13:59:30	10	87		0.03114	0.02392	0.0217	0.02073	0.01934	0.01907	0.01886	0.01861	0.01748	0.01728	#N/A	#N/A	#N/A	#N/A	#N/A	#N/A	#N/A	#N/A	#N/A	#N/A	#N/A	#N/A	#N/A	#N/A	#N/A	#N/A	#N/A	#N/A	#N/A	#N/A	#N/A	#N/A	#N/A	#N/A	#N/A	#N/A	#N/A	#N/A	#N/A	#N/A	#N/A	#N/A
M-B-4	Moulin	2019-09-29 15:32:30	10	89		0.04085	0.03447	0.0312	0.02804	0.02661	0.02526	0.02463	0.02361	0.02247	0.02162	#N/A	#N/A	#N/A	#N/A	#N/A	#N/A	#N/A	#N/A	#N/A	#N/A	#N/A	#N/A	#N/A	#N/A	#N/A	#N/A	#N/A	#N/A	#N/A	#N/A	#N/A	#N/A	#N/A	#N/A	#N/A	#N/A	#N/A	#N/A	#N/A	#N/A	#N/A	#N/A
M-B-4	Moulin	2019-09-30 10:03:30	13	145		0.02565	0.02002	0.01793	0.01606	0.01575	0.01499	0.01524	0.01485	0.01478	0.01448	0.01449	0.01486	0.01382	#N/A	#N/A	#N/A	#N/A	#N/A	#N/A	#N/A	#N/A	#N/A	#N/A	#N/A	#N/A	#N/A	#N/A	#N/A	#N/A	#N/A	#N/A	#N/A	#N/A	#N/A	#N/A	#N/A	#N/A	#N/A	#N/A	#N/A	#N/A	#N/A
M-C-1	Moulin	2019-09-30 12:27:30	13	121		0.02662	0.02088	0.01859	0.01687	0.01647	0.01569	0.01582	0.01536	0.01534	0.0149	0.01503	0.01558	0.0143	#N/A	#N/A	#N/A	#N/A	#N/A	#N/A	#N/A	#N/A	#N/A	#N/A	#N/A	#N/A	#N/A	#N/A	#N/A	#N/A	#N/A	#N/A	#N/A	#N/A	#N/A	#N/A	#N/A	#N/A	#N/A	#N/A	#N/A	#N/A	#N/A
M-B-4	Moulin	2019-09-30 14:32:30	12	107		0.03113	0.02655	0.02454	0.0226	0.02232	0.01976	0.01951	0.01959	0.01946	0.01905	0.01791	0.01797	#N/A	#N/A	#N/A	#N/A	#N/A	#N/A	#N/A	#N/A	#N/A	#N/A	#N/A	#N/A	#N/A	#N/A	#N/A	#N/A	#N/A	#N/A	#N/A	#N/A	#N/A	#N/A	#N/A	#N/A	#N/A	#N/A	#N/A	#N/A	#N/A	#N/A
B-G-6	Brusquet	2019-10-02 09:01:30	11	99		0.02929	0.0232	0.02052	0.01868	0.01727	0.01659	0.01573	0.01528	0.01504	0.01367	0.0138	#N/A	#N/A	#N/A	#N/A	#N/A	#N/A	#N/A	#N/A	#N/A	#N/A	#N/A	#N/A	#N/A	#N/A	#N/A	#N/A	#N/A	#N/A	#N/A	#N/A	#N/A	#N/A	#N/A	#N/A	#N/A	#N/A	#N/A	#N/A	#N/A	#N/A	#N/A
M-B-4	Moulin	2019-10-02 11:57:30	15	143		0.02203	0.01823	0.01609	0.0143	0.01242	0.01217	0.01163	0.01131	0.01072	0.01037	0.01024	0.00921	0.00905	0.00952	0.00898	#N/A	#N/A	#N/A	#N/A	#N/A	#N/A	#N/A	#N/A	#N/A	#N/A	#N/A	#N/A	#N/A	#N/A	#N/A	#N/A	#N/A	#N/A	#N/A	#N/A	#N/A	#N/A	#N/A	#N/A	#N/A	#N/A	#N/A
M-C-1	Moulin	2019-10-02 14:38:00	15	162		0.0186	0.01369	0.0116	0.00991	0.0086	0.0085	0.00831	0.0081	0.00758	0.00773	0.00773	0.00725	0.00721	0.00766	0.00727	#N/A	#N/A	#N/A	#N/A	#N/A	#N/A	#N/A	#N/A	#N/A	#N/A	#N/A	#N/A	#N/A	#N/A	#N/A	#N/A	#N/A	#N/A	#N/A	#N/A	#N/A	#N/A	#N/A	#N/A	#N/A	#N/A	#N/A

## Sheet: Table S4
Table S4. Results of exponential fitting of repeated CO2 accumulation rates over time (Eq. 9).
Chamber	Site	Date and time	Considered repeats (n)	Stabilized or extrapolated	Coefficient α (mgC min-1)	Coefficient α: Range 95%CI+ (mgC min-1)	Coefficient α: Range 95%CI- (mgC min-1)	Coefficient β (min-1)	Coefficient β: Range 95%CI+ (min-1)	Coefficient β: Range 95%CI- (min-1)	Coefficient qPlateau (mgC min-1)	Coefficient qPlateau: Range 95%CI+ (mgC min-1)	Coefficient qPlateau: Range 95%CI- (mgC min-1)
M-A-2	Moulin	2018-09-27 08:54:30	10	Extrapolated	0.00163	0.0021	0.00116	0.0561	0.0661	0.0461	0.00175	0.00189	0.00161
M-B-4	Moulin	2018-09-27 10:10:00	10	Stabilized	0.01461	0.01831	0.01091	0.0869	0.1147	0.0592	0.01263	0.01314	0.01211
M-C-1	Moulin	2018-09-27 11:18:00	8	Stabilized	0.02116	0.02388	0.01845	0.0657	0.0834	0.0479	0.01816	0.01929	0.01703
M-D-3	Moulin	2018-09-27 12:18:30	8	Stabilized	0.01543	0.01634	0.01451	0.0732	0.0806	0.0658	0.00934	0.00959	0.00908
B-F-5	Brusquet	2018-09-27 14:19:00	8	Stabilized	0.01753	0.02439	0.01067	0.0281	0.0619	-0.0057	0.01711	0.02652	0.0077
B-G-6	Brusquet	2018-09-27 15:21:30	8	Stabilized	0.02401	0.02639	0.02162	0.0449	0.0595	0.0303	0.02785	0.02999	0.02572
B-H-7	Brusquet	2018-09-27 16:26:00	8	Stabilized	0.01644	0.01875	0.01413	0.0446	0.0667	0.0224	0.02539	0.02776	0.02302
B-I-8	Brusquet	2018-09-27 17:25:00	8	Stabilized	0.01888	0.02215	0.01562	0.0627	0.0871	0.0384	0.02069	0.02222	0.01916
M-C-1	Moulin	2019-01-11 11:57:00	3	Extrapolated	0.00123	0.00633	-0.00387	0.0612	0.0693	0.0532	0.00099	0.00189	8e-05
M-D-3	Moulin	2019-01-11 13:11:00	3	Extrapolated	0.00075	0.00292	-0.00142	0.0552	0.0708	0.0397	0.0005	0.00086	0.00015
M-B-4	Moulin	2019-01-11 14:24:00	9	Extrapolated	0.00269	0.0035	0.00188	0.0462	0.064	0.0285	0.00234	0.00261	0.00208
M-A-2	Moulin	2019-01-11 15:39:00	9	Extrapolated	-1e-05	0.00022	-0.00024	0.0561	0.0661	0.0461	0.00175	0.00182	0.00169
B-F-5	Brusquet	2019-01-12 11:05:30	9	Extrapolated	0.001	0.00166	0.00034	0.0345	0.0436	0.0254	0.0011	0.00137	0.00083
B-G-6	Brusquet	2019-01-12 12:17:00	9	Extrapolated	0.00431	0.00555	0.00308	0.0553	0.0846	0.0261	0.00321	0.00359	0.00284
B-H-7	Brusquet	2019-01-12 13:24:00	9	Stabilized	0.00413	0.00631	0.00196	0.1266	0.1943	0.0589	0.003	0.00318	0.00283
B-I-8	Brusquet	2019-01-12 14:33:30	9	Extrapolated	0.00244	0.00326	0.00162	0.0538	0.0625	0.0452	0.00261	0.00285	0.00237
B-F-5	Brusquet	2019-01-12 15:45:30	9	Extrapolated	0.00178	0.00326	0.0003	0.0345	0.0436	0.0254	0.00378	0.00439	0.00317
M-B-4	Moulin	2019-01-13 12:36:30	42	Stabilized	0.00194	0.00234	0.00155	0.0219	0.029	0.0148	0.00226	0.00234	0.00217
B-F-5	Brusquet	2019-01-14 10:19:30	6	Extrapolated	0.00134	0.00217	0.00051	0.0345	0.0436	0.0254	0.00259	0.003	0.00217
B-G-6	Brusquet	2019-01-14 13:07:30	38	Stabilized	0.02374	0.03048	0.017	0.1322	0.1636	0.1008	0.00372	0.00388	0.00356
B-F-5	Brusquet	2019-01-14 16:55:00	6	Extrapolated	0.00423	0.00601	0.00245	0.0345	0.0436	0.0254	0.00473	0.00562	0.00383
M-C-1	Moulin	2019-04-11 10:26:00	9	Extrapolated	0.00312	0.00429	0.00194	0.0612	0.0693	0.0532	0.0014	0.00165	0.00115
M-D-3	Moulin	2019-04-11 11:53:30	7	Extrapolated	0.00029	0.00079	-0.00021	0.0552	0.0708	0.0397	0.00081	0.00094	0.00068
M-A-2	Moulin	2019-04-11 13:12:00	7	Extrapolated	0.00114	0.00185	0.00042	0.0561	0.0661	0.0461	0.00122	0.00141	0.00104
M-B-4	Moulin	2019-04-11 14:45:30	10	Extrapolated	0.00644	0.00786	0.00502	0.0462	0.064	0.0285	0.00155	0.0019	0.0012
B-F-5	Brusquet	2019-04-12 09:26:30	9	Extrapolated	0.00163	0.00187	0.00139	0.0345	0.0436	0.0254	0.00106	0.00113	0.00098
B-G-6	Brusquet	2019-04-12 10:57:00	9	Stabilized	0.00651	0.0091	0.00391	0.0494	0.0899	0.0088	0.00626	0.0073	0.00522
B-H-7	Brusquet	2019-04-12 12:24:00	9	Extrapolated	0.00552	0.00643	0.0046	0.0856	0.1436	0.0276	0.00192	0.00207	0.00177
B-I-8	Brusquet	2019-04-12 13:57:00	8	Extrapolated	0.00496	0.00618	0.00373	0.0538	0.0625	0.0452	0.00428	0.00458	0.00399
M-B-4	Moulin	2019-04-13 11:54:30	31	Extrapolated	0.00705	0.00797	0.00614	0.0462	0.064	0.0285	0.00086	0.00096	0.00075
M-B-4	Moulin	2019-04-14 10:24:30	10	Extrapolated	0.00489	0.00555	0.00422	0.0462	0.064	0.0285	0.0009	0.00104	0.00077
B-G-6	Brusquet	2019-04-14 14:36:00	10	Extrapolated	0.00656	0.00744	0.00567	0.0553	0.0846	0.0261	0.00243	0.00263	0.00224
B-G-6	Brusquet	2019-04-15 10:32:30	26	Extrapolated	0.00914	0.01037	0.00791	0.0553	0.0846	0.0261	0.00202	0.00219	0.00186
M-B-4	Moulin	2019-04-15 14:59:00	9	Extrapolated	0.00506	0.00604	0.00407	0.0462	0.064	0.0285	0.002	0.00224	0.00175
M-C-1	Moulin	2019-05-27 13:16:00	18	Extrapolated	0.00876	0.01025	0.00727	0.0612	0.0693	0.0532	0.00259	0.00281	0.00238
M-B-4	Moulin	2019-05-27 15:25:00	8	Extrapolated	0.01257	0.01602	0.00911	0.0462	0.064	0.0285	0.00209	0.00331	0.00087
B-G-6	Brusquet	2019-05-29 09:13:30	15	Stabilized	0.01557	0.01758	0.01356	0.0537	0.064	0.0434	0.00689	0.00728	0.00649
B-F-5	Brusquet	2019-05-29 10:30:00	4	Extrapolated	0.00369	0.0048	0.00257	0.0345	0.0436	0.0254	0.00077	0.00144	9e-05
B-F-5	Brusquet	2019-07-05 08:04:00	10	Extrapolated	0.01784	0.01881	0.01687	0.0345	0.0436	0.0254	0.01241	0.01275	0.01207
B-G-6	Brusquet	2019-07-05 09:36:00	10	Stabilized	0.04075	0.04791	0.03359	0.0445	0.0608	0.0283	0.0348	0.03773	0.03187
B-H-7	Brusquet	2019-07-05 11:07:00	10	Extrapolated	0.04213	0.05238	0.03188	0.0856	0.1436	0.0276	0.02148	0.02329	0.01967
B-I-8	Brusquet	2019-07-05 12:37:00	10	Stabilized	0.02433	0.02895	0.01972	0.0637	0.0818	0.0456	0.01837	0.01934	0.0174
M-C-1	Moulin	2019-07-06 07:52:30	10	Extrapolated	0.03685	0.04112	0.03257	0.0612	0.0693	0.0532	0.01867	0.01963	0.01771
M-D-3	Moulin	2019-07-06 09:28:30	10	Stabilized	0.01521	0.0161	0.01433	0.0457	0.0507	0.0407	0.00642	0.00672	0.00612
M-A-2	Moulin	2019-07-06 11:01:00	10	Stabilized	0.00642	0.00777	0.00508	0.0632	0.0837	0.0427	0.00943	0.00974	0.00913
M-B-4	Moulin	2019-07-06 12:28:30	9	Extrapolated	0.03283	0.03623	0.02943	0.0462	0.064	0.0285	0.02257	0.02355	0.0216
B-I-8	Brusquet	2019-07-07 06:14:00	9	Extrapolated	0.03064	0.03374	0.02754	0.0538	0.0625	0.0452	0.02146	0.02231	0.02061
B-G-6	Brusquet	2019-07-07 09:07:00	10	Stabilized	0.04944	0.06372	0.03516	0.0454	0.0686	0.0222	0.0394	0.04367	0.03513
B-F-5	Brusquet	2019-07-07 10:46:00	10	Stabilized	0.01944	0.02117	0.01771	0.0409	0.0496	0.0322	0.01384	0.01476	0.01293
M-B-4	Moulin	2019-07-08 07:09:00	14	Stabilized	0.02261	0.02536	0.01986	0.0369	0.045	0.0289	0.01573	0.01656	0.01489
M-D-3	Moulin	2019-07-08 09:09:00	8	Stabilized	0.0144	0.01601	0.01278	0.0468	0.0563	0.0374	0.00468	0.00518	0.00418
M-A-2	Moulin	2019-07-08 10:31:30	8	Stabilized	0.00479	0.0058	0.00379	0.049	0.0745	0.0235	0.00696	0.00752	0.00639
M-C-1	Moulin	2019-07-08 11:57:30	10	Stabilized	0.03434	0.04052	0.02817	0.0632	0.0796	0.0468	0.021	0.02219	0.0198
M-B-4	Moulin	2019-07-10 09:05:00	16	Stabilized	0.02495	0.02893	0.02097	0.0432	0.0537	0.0327	0.01305	0.01388	0.01222
M-C-1	Moulin	2019-07-10 11:06:30	10	Stabilized	0.02705	0.02997	0.02414	0.0547	0.0644	0.0449	0.0172	0.01795	0.01644
M-B-4	Moulin	2019-07-11 07:53:30	10	Stabilized	0.02914	0.03221	0.02606	0.0495	0.0594	0.0395	0.01606	0.01713	0.01499
M-C-1	Moulin	2019-07-11 09:27:30	10	Stabilized	0.02893	0.03328	0.02458	0.0599	0.0733	0.0465	0.01725	0.01815	0.01635
B-G-6	Brusquet	2019-07-12 13:56:00	8	Stabilized	0.02711	0.03444	0.01977	0.0398	0.0626	0.0171	0.03509	0.03817	0.03201
B-I-8	Brusquet	2019-07-12 15:27:00	8	Stabilized	0.02555	0.03058	0.02051	0.0486	0.0694	0.0279	0.02018	0.0224	0.01797
M-B-4	Moulin	2019-07-12 18:17:30	8	Stabilized	0.04285	0.04866	0.03704	0.0638	0.0779	0.0497	0.028	0.02949	0.02651
B-G-6	Brusquet	2019-09-27 15:05:00	10	Stabilized	0.02752	0.03149	0.02355	0.0496	0.0627	0.0365	0.02495	0.02622	0.02369
B-I-8	Brusquet	2019-09-27 16:37:30	10	Stabilized	0.01874	0.02074	0.01674	0.0479	0.0578	0.038	0.01725	0.01796	0.01654
B-G-6	Brusquet	2019-09-27 17:35:00	2	neither (limited by only 2 repeats)	#N/A	#N/A	#N/A	#N/A	#N/A	#N/A	#N/A	#N/A	#N/A
B-F-5	Brusquet	2019-09-28 10:20:00	8	Extrapolated	0.00571	0.00659	0.00483	0.0345	0.0436	0.0254	0.00748	0.00781	0.00716
B-G-6	Brusquet	2019-09-28 11:50:00	11	Stabilized	0.02717	0.02964	0.0247	0.0386	0.0466	0.0305	0.02158	0.02279	0.02037
B-I-8	Brusquet	2019-09-28 14:06:00	18	Stabilized	0.01434	0.01541	0.01327	0.0461	0.0509	0.0413	0.01246	0.01264	0.01229
B-H-7	Brusquet	2019-09-28 16:06:30	7	Extrapolated	0.02287	0.02931	0.01643	0.0856	0.1436	0.0276	0.01742	0.0186	0.01624
M-B-4	Moulin	2019-09-29 09:52:30	10	Stabilized	0.02341	0.02521	0.0216	0.0439	0.0514	0.0364	0.01627	0.0171	0.01544
M-A-2	Moulin	2019-09-29 11:12:30	8	Extrapolated	0.00349	0.00473	0.00225	0.0561	0.0661	0.0461	0.00859	0.00894	0.00824
M-D-3	Moulin	2019-09-29 12:32:00	8	Extrapolated	0.0111	0.01315	0.00905	0.0552	0.0708	0.0397	0.0061	0.0066	0.0056
M-C-1	Moulin	2019-09-29 13:59:30	10	Stabilized	0.02375	0.02958	0.01791	0.0721	0.0949	0.0493	0.01809	0.01895	0.01724
M-B-4	Moulin	2019-09-29 15:32:30	10	Stabilized	0.02666	0.02877	0.02455	0.0379	0.0456	0.0301	0.02138	0.02265	0.0201
M-B-4	Moulin	2019-09-30 10:03:30	13	Stabilized	0.02053	0.02329	0.01778	0.0564	0.0654	0.0475	0.01458	0.01488	0.01427
M-C-1	Moulin	2019-09-30 12:27:30	13	Stabilized	0.02084	0.02373	0.01794	0.0654	0.0764	0.0544	0.01512	0.01547	0.01478
M-B-4	Moulin	2019-09-30 14:32:30	12	Stabilized	0.01782	0.02004	0.0156	0.0374	0.0473	0.0275	0.01801	0.01896	0.01707
B-G-6	Brusquet	2019-10-02 09:01:30	11	Extrapolated	0.02426	0.02678	0.02174	0.0553	0.0846	0.0261	0.0147	0.01528	0.01412
M-B-4	Moulin	2019-10-02 11:57:30	15	Stabilized	0.01686	0.01821	0.01551	0.0308	0.0357	0.0258	0.00916	0.00968	0.00865
M-C-1	Moulin	2019-10-02 14:38:00	15	Stabilized	0.01833	0.01986	0.0168	0.0476	0.0528	0.0425	0.0075	0.00771	0.00729

## Sheet: Table S5
Table S5. Diffusivity measures and chamber temperature during measurement.
Chamber	Site	Date and time	D/ω (repeats 6-8, cm3 min-1)	D/ω: 1SD (repeats 6-8, cm3 min-1)	D/ω (qPlateau, cm3 min-1)	D/ω: Range 95%CI+ (qPlateau, cm3 min-1)	D/ω: Range 95%CI- (qPlateau, cm3 min-1)	λ (min-1)	λ: 1SD (min-1)	Filter "dry" vs. "wet" (i.e., last 3 days: average rainfall < or ≥ 5mm)	Chamber temperature (compiled) (°C)	Chamber temperature error (compiled) (°C)
M-A-2	Moulin	2018-09-27 08:54:30	#N/A	#N/A	#N/A	#N/A	#N/A	0.109	0.007	Dry	23.5	0
M-B-4	Moulin	2018-09-27 10:10:00	#N/A	#N/A	#N/A	#N/A	#N/A	0.18	0.005	Dry	24	0
M-C-1	Moulin	2018-09-27 11:18:00	#N/A	#N/A	#N/A	#N/A	#N/A	0.136	0.007	Dry	24.5	0
M-D-3	Moulin	2018-09-27 12:18:30	#N/A	#N/A	#N/A	#N/A	#N/A	0.081	0.001	Dry	25.5	0
B-F-5	Brusquet	2018-09-27 14:19:00	#N/A	#N/A	#N/A	#N/A	#N/A	0.231	0.004	Dry	20.8	1.8
B-G-6	Brusquet	2018-09-27 15:21:30	#N/A	#N/A	#N/A	#N/A	#N/A	0.19	0.001	Dry	25	0
B-H-7	Brusquet	2018-09-27 16:26:00	#N/A	#N/A	#N/A	#N/A	#N/A	0.336	0.006	Dry	26.5	0
B-I-8	Brusquet	2018-09-27 17:25:00	#N/A	#N/A	#N/A	#N/A	#N/A	0.235	0.003	Dry	27	0
M-C-1	Moulin	2019-01-11 11:57:00	#N/A	#N/A	13.36	25.63	1.09	#N/A	#N/A	Dry	-0.8	2.2
M-D-3	Moulin	2019-01-11 13:11:00	#N/A	#N/A	#N/A	#N/A	#N/A	#N/A	#N/A	Dry	-0.8	2.2
M-B-4	Moulin	2019-01-11 14:24:00	18.07	2.37	16.9	20.07	14.07	0.071	0.038	Dry	-0.8	2.2
M-A-2	Moulin	2019-01-11 15:39:00	#N/A	#N/A	#N/A	#N/A	#N/A	0.109	0.019	Dry	2	2.2
B-F-5	Brusquet	2019-01-12 11:05:30	#N/A	#N/A	#N/A	#N/A	#N/A	0.061	0.035	Dry	-0.9	1.8
B-G-6	Brusquet	2019-01-12 12:17:00	14.06	0.79	12.17	16.38	9.77	0.109	0.007	Dry	0	0
B-H-7	Brusquet	2019-01-12 13:24:00	31.98	0.75	32.34	34.23	30.11	0.179	0.01	Dry	0	0
B-I-8	Brusquet	2019-01-12 14:33:30	17.5	1.8	16.53	18.44	14.91	0.081	0.035	Dry	0.5	0
B-F-5	Brusquet	2019-01-12 15:45:30	#N/A	#N/A	#N/A	#N/A	#N/A	0.117	0.006	Dry	1	0
M-B-4	Moulin	2019-01-13 12:36:30	21.82	1.55	16.66	18.64	16.02	0.136	0.011	Dry	0.7	2.2
B-F-5	Brusquet	2019-01-14 10:19:30	#N/A	#N/A	28.39	39.09	23.87	#N/A	#N/A	Dry	2	0
B-G-6	Brusquet	2019-01-14 13:07:30	14.64	0.28	11.79	12.3	9.84	0.11	0.001	Dry	2.5	0
B-F-5	Brusquet	2019-01-14 16:55:00	#N/A	#N/A	#N/A	#N/A	#N/A	#N/A	#N/A	Dry	5	0
M-C-1	Moulin	2019-04-11 10:26:00	7	1	7.47	9.41	4.53	0.018	0.081	Wet	8.6	2.2
M-D-3	Moulin	2019-04-11 11:53:30	#N/A	#N/A	#N/A	#N/A	#N/A	#N/A	#N/A	Wet	8.8	2.2
M-A-2	Moulin	2019-04-11 13:12:00	#N/A	#N/A	18.34	22.36	13.57	#N/A	#N/A	Wet	9.5	2.2
M-B-4	Moulin	2019-04-11 14:45:30	7.1	0.26	6.49	7.96	4.27	0.1	0.031	Wet	10.7	2.2
B-F-5	Brusquet	2019-04-12 09:26:30	#N/A	#N/A	#N/A	#N/A	#N/A	0.063	0.044	Wet	9	0
B-G-6	Brusquet	2019-04-12 10:57:00	14.51	1.08	13.67	15.95	11.4	0.092	0.017	Wet	9.5	0
B-H-7	Brusquet	2019-04-12 12:24:00	17.13	0.22	17.53	18.9	14.44	0.095	0.021	Wet	10	0
B-I-8	Brusquet	2019-04-12 13:57:00	18.1	0.93	18.37	20.39	15.81	0.105	0.016	Wet	11.5	0
M-B-4	Moulin	2019-04-13 11:54:30	3.34	0.76	2.26	2.54	1.46	0.025	0.065	Wet	11.5	0
M-B-4	Moulin	2019-04-14 10:24:30	5.27	0.29	4.36	6.05	2.23	0.12	0.039	Wet	9	0
B-G-6	Brusquet	2019-04-14 14:36:00	4.96	0.25	4.57	5.11	3.63	0.072	0.014	Wet	12	0
B-G-6	Brusquet	2019-04-15 10:32:30	5.8	0.28	4.46	4.83	3.49	0.076	0.013	Wet	8	0
M-B-4	Moulin	2019-04-15 14:59:00	8.01	0.95	7.27	9.02	5.28	0.075	0.041	Dry	14.5	0
M-C-1	Moulin	2019-05-27 13:16:00	8.52	0.98	7.33	7.94	4.84	0.076	0.008	Wet	16.5	0
M-B-4	Moulin	2019-05-27 15:25:00	7.32	0.65	4.2	8.91	1.75	0.095	0.017	Wet	17.5	0
B-G-6	Brusquet	2019-05-29 09:13:30	10.67	0.85	9.19	9.72	8.67	0.127	0.001	Dry	12.5	0
B-F-5	Brusquet	2019-05-29 10:30:00	#N/A	#N/A	8.48	39.21	1.03	#N/A	#N/A	Dry	12.5	0
B-F-5	Brusquet	2019-07-05 08:04:00	44.87	1.71	37.16	45.75	35.95	0.255	0.008	Dry	27.5	0
B-G-6	Brusquet	2019-07-05 09:36:00	30.5	1.13	27.78	30.32	25.45	0.226	0.006	Dry	27.5	0
B-H-7	Brusquet	2019-07-05 11:07:00	47.13	1.92	48.04	52.09	38.92	0.324	0.008	Dry	27.5	0
B-I-8	Brusquet	2019-07-05 12:37:00	33.78	1.22	31.74	33.41	29.4	0.238	0.005	Dry	28.5	0
M-C-1	Moulin	2019-07-06 07:52:30	21.02	1.04	20.04	21.53	17.28	0.153	0.005	Dry	29.5	0
M-D-3	Moulin	2019-07-06 09:28:30	9.86	0.52	8.74	9.99	8.32	0.09	0.008	Dry	29	0
M-A-2	Moulin	2019-07-06 11:01:00	50.17	0.52	49.16	51.97	47.25	0.202	0.011	Dry	29.5	0
M-B-4	Moulin	2019-07-06 12:28:30	28.59	0.81	25.99	30.12	24.34	0.242	0.002	Wet	30.5	0
B-I-8	Brusquet	2019-07-07 06:14:00	32.98	0.99	30.44	34.84	27.89	0.242	0.002	Dry	31	0
B-G-6	Brusquet	2019-07-07 09:07:00	31.95	0.86	29.82	33.06	26.59	0.234	0.003	Dry	30	0
B-F-5	Brusquet	2019-07-07 10:46:00	45.63	1.15	40.62	44.91	37.93	0.246	0.009	Dry	29	0
M-B-4	Moulin	2019-07-08 07:09:00	25.46	0.5	21.86	23.02	19.87	0.205	0.005	Wet	27	0
M-D-3	Moulin	2019-07-08 09:09:00	7.83	0.27	7.31	8.48	6.52	0.07	0.015	Wet	26.5	0
M-A-2	Moulin	2019-07-08 10:31:30	50.87	1.01	48.77	53.34	44.83	0.199	0.011	Wet	27	0
M-C-1	Moulin	2019-07-08 11:57:30	23.99	0.71	22.6	24.68	20.83	0.16	0.007	Wet	28	0
M-B-4	Moulin	2019-07-10 09:05:00	27.71	1.41	23.27	24.75	21.8	0.2	0.001	Wet	23.5	0
M-C-1	Moulin	2019-07-10 11:06:30	21.61	0.45	20.46	22.41	19.43	0.145	0.006	Wet	24.5	0
M-B-4	Moulin	2019-07-11 07:53:30	28.23	1.16	25.21	27.48	23.53	0.21	0.004	Wet	25.5	0
M-C-1	Moulin	2019-07-11 09:27:30	22.71	0.98	21.51	22.63	20.39	0.151	0.002	Wet	25.5	0
B-G-6	Brusquet	2019-07-12 13:56:00	33.7	0.77	32.3	35.58	29.46	0.239	0.004	Dry	28	0
B-I-8	Brusquet	2019-07-12 15:27:00	34.9	0.69	33.29	36.95	29.64	0.252	0.008	Dry	29	0
M-B-4	Moulin	2019-07-12 18:17:30	28.85	0.92	28.06	31.11	26.57	0.228	0.002	Dry	33	0
B-G-6	Brusquet	2019-09-27 15:05:00	36.27	0.81	33.81	36.21	32.06	0.212	0	Dry	24	0
B-I-8	Brusquet	2019-09-27 16:37:30	35.98	1.21	33.45	35.48	32.07	0.229	0.003	Dry	26.5	0
B-G-6	Brusquet	2019-09-27 17:35:00	#N/A	#N/A	#N/A	#N/A	#N/A	#N/A	#N/A	Dry	26.5	0
B-F-5	Brusquet	2019-09-28 10:20:00	42.2	1.75	39.36	46.47	37.66	0.204	0.018	Dry	18	0
B-G-6	Brusquet	2019-09-28 11:50:00	34.67	1.17	30.6	33.05	28.89	0.201	0.002	Dry	20	0
B-I-8	Brusquet	2019-09-28 14:06:00	35.33	0.7	33.26	33.98	32.8	0.207	0.003	Dry	22	0
B-H-7	Brusquet	2019-09-28 16:06:30	#N/A	#N/A	53.47	57.08	47.78	#N/A	#N/A	Dry	26	0
M-B-4	Moulin	2019-09-29 09:52:30	35.34	1.19	31.59	34.68	29.99	0.218	0.006	Dry	22	0
M-A-2	Moulin	2019-09-29 11:12:30	51.95	0.58	49.89	53.36	47.85	0.203	0.009	Dry	22	0
M-D-3	Moulin	2019-09-29 12:32:00	10.09	0.92	9.99	12.35	7.84	0.037	0.06	Dry	24	0
M-C-1	Moulin	2019-09-29 13:59:30	28.18	0.28	27.05	28.74	24.45	0.156	0.001	Dry	25	0
M-B-4	Moulin	2019-09-29 15:32:30	#N/A	#N/A	#N/A	#N/A	#N/A	0.23	0.003	Dry	27	0
M-B-4	Moulin	2019-09-30 10:03:30	29.3	0.31	28.42	30.13	25.99	0.14	0.008	Dry	22.5	0
M-C-1	Moulin	2019-09-30 12:27:30	26.29	0.32	25.44	27.35	23.03	0.14	0.008	Wet	23.5	0
M-B-4	Moulin	2019-09-30 14:32:30	#N/A	#N/A	#N/A	#N/A	#N/A	0.218	0.006	Wet	26.5	0
B-G-6	Brusquet	2019-10-02 09:01:30	18.94	0.65	17.55	18.72	15.12	0.125	0.004	Wet	16.5	0
M-B-4	Moulin	2019-10-02 11:57:30	25.77	0.78	20.18	21.53	18.91	0.168	0.002	Wet	22	0
M-C-1	Moulin	2019-10-02 14:38:00	13.31	0.26	12.02	12.61	11.04	0.081	0.006	Wet	24	0

## Sheet: Table S6
Table S6. CO2 sampling with MSCs: overview of recovery in the laboratory vs. estimate of trapped via IRGA (basis for SR, Eq. 6).
Chamber	Date and time	Laboratory: recovered CO2 (ml at 0°C and 1.013bar)	IRGA: est. trapped CO2 (ml at 0°C and 1.013bar)
M-C-1	2019-05-27 13:16:00	0.91	1.27
M-C-1	2019-10-02 14:38:00	1.9	2.23
M-C-1	2019-09-30 12:27:30	2.27	2.4
M-C-1	2019-07-08 11:57:30	3.83	2.75
M-B-4	2019-04-14 10:24:30	1.53	1.88
M-B-4	2019-01-13 12:36:30	0.97	1.18
M-B-4	2019-10-02 11:57:30	1.81	2.12
M-B-4	2019-07-08 07:09:00	2.35	2.54
M-B-4	2019-07-10 09:05:00	2.75	2.67
M-B-4	2019-09-30 10:03:30	2.71	2.56
M-B-4	2019-09-30 14:32:30	2.3	2.17
B-G-6	2019-04-14 14:36:00	1.81	1.95
B-G-6	2019-09-28 11:50:00	2.66	2.65
B-G-6	2019-10-02 09:01:30	2.35	2.3
B-G-6	2019-01-14 13:07:30	1.74	1.67
B-G-6	2019-05-29 09:13:30	1.51	1.45
B-G-6	2019-07-12 13:56:00	2.75	2.48
B-G-6	2019-07-07 09:07:00	5.32	4.33
B-I-8	2019-09-28 14:06:00	2.64	2.43
B-I-8	2019-07-12 15:27:00	2.11	1.82

## Sheet: Table S7
Table S7. pCO2 Rock, chamber interior: air pressure, CO2 Excess (Eq. 12), and VRock pores (Eq. 13).
Chamber	Site	Date and time	pCO2 (ppmv)	Chamber interior air pressure (mbar)	CO2 Excess (mgC)	CO2 Excess: Range 95%CI+ (mgC)	CO2 Excess: Range 95%CI- (mgC)	VRock_pores (cm3)	VRock_pores: Range 95%CI+ (cm3)	VRock_pores: Range 95%CI- (cm3)
M-A-2	Moulin	2018-09-27 08:54:30	#N/A	939	#N/A	#N/A	#N/A	#N/A	#N/A	#N/A
M-B-4	Moulin	2018-09-27 10:10:00	#N/A	939	#N/A	#N/A	#N/A	#N/A	#N/A	#N/A
M-C-1	Moulin	2018-09-27 11:18:00	#N/A	939	#N/A	#N/A	#N/A	#N/A	#N/A	#N/A
M-D-3	Moulin	2018-09-27 12:18:30	#N/A	938	#N/A	#N/A	#N/A	#N/A	#N/A	#N/A
B-F-5	Brusquet	2018-09-27 14:19:00	#N/A	939	#N/A	#N/A	#N/A	#N/A	#N/A	#N/A
B-G-6	Brusquet	2018-09-27 15:21:30	#N/A	939	#N/A	#N/A	#N/A	#N/A	#N/A	#N/A
B-H-7	Brusquet	2018-09-27 16:26:00	#N/A	938	#N/A	#N/A	#N/A	#N/A	#N/A	#N/A
B-I-8	Brusquet	2018-09-27 17:25:00	#N/A	938	#N/A	#N/A	#N/A	#N/A	#N/A	#N/A
M-C-1	Moulin	2019-01-11 11:57:00	551	926	0.01	0.067	-0.026	38	248	-96
M-D-3	Moulin	2019-01-11 13:11:00	#N/A	925	#N/A	#N/A	#N/A	#N/A	#N/A	#N/A
M-B-4	Moulin	2019-01-11 14:24:00	683	931	0.048	0.11	0.023	145	329	68
M-A-2	Moulin	2019-01-11 15:39:00	#N/A	925	#N/A	#N/A	#N/A	#N/A	#N/A	#N/A
B-F-5	Brusquet	2019-01-12 11:05:30	#N/A	931	#N/A	#N/A	#N/A	#N/A	#N/A	#N/A
B-G-6	Brusquet	2019-01-12 12:17:00	936	931	0.064	0.193	0.027	138	419	58
B-H-7	Brusquet	2019-01-12 13:24:00	588	932	0.02	0.087	0.005	71	300	17
B-I-8	Brusquet	2019-01-12 14:33:30	721	930	0.037	0.06	0.02	103	170	57
B-F-5	Brusquet	2019-01-12 15:45:30	#N/A	930	#N/A	#N/A	#N/A	#N/A	#N/A	#N/A
M-B-4	Moulin	2019-01-13 12:36:30	681	923	0.081	0.149	0.047	247	453	144
B-F-5	Brusquet	2019-01-14 10:19:30	588	921	0.034	0.078	0.01	120	273	35
B-G-6	Brusquet	2019-01-14 13:07:30	1052	921	0.105	0.203	0.053	207	399	104
B-F-5	Brusquet	2019-01-14 16:55:00	#N/A	921	#N/A	#N/A	#N/A	#N/A	#N/A	#N/A
M-C-1	Moulin	2019-04-11 10:26:00	800	918	0.037	0.061	0.019	98	163	52
M-D-3	Moulin	2019-04-11 11:53:30	#N/A	918	#N/A	#N/A	#N/A	#N/A	#N/A	#N/A
M-A-2	Moulin	2019-04-11 13:12:00	543	918	0.015	0.032	0.005	60	125	18
M-B-4	Moulin	2019-04-11 14:45:30	913	918	0.108	0.237	0.055	255	557	129
B-F-5	Brusquet	2019-04-12 09:26:30	#N/A	924	#N/A	#N/A	#N/A	#N/A	#N/A	#N/A
B-G-6	Brusquet	2019-04-12 10:57:00	1367	925	0.106	0.97	0.029	163	1499	44
B-H-7	Brusquet	2019-04-12 12:24:00	632	925	0.042	0.204	0.015	140	684	50
B-I-8	Brusquet	2019-04-12 13:57:00	897	924	0.068	0.106	0.042	162	253	100
M-B-4	Moulin	2019-04-13 11:54:30	1211	923	0.111	0.231	0.061	196	408	108
M-B-4	Moulin	2019-04-14 10:24:30	842	921	0.077	0.161	0.042	195	407	107
B-G-6	Brusquet	2019-04-14 14:36:00	1535	922	0.088	0.249	0.042	123	346	59
B-G-6	Brusquet	2019-04-15 10:32:30	1349	930	0.123	0.346	0.059	190	536	91
M-B-4	Moulin	2019-04-15 14:59:00	993	927	0.083	0.18	0.044	182	392	95
M-C-1	Moulin	2019-05-27 13:16:00	1173	921	0.102	0.144	0.072	190	268	133
M-B-4	Moulin	2019-05-27 15:25:00	1492	918	0.227	0.505	0.111	335	743	163
B-G-6	Brusquet	2019-05-29 09:13:30	2004	925	0.233	0.34	0.163	249	364	175
B-F-5	Brusquet	2019-05-29 10:30:00	594	924	0.095	0.173	0.051	344	626	184
B-F-5	Brusquet	2019-07-05 08:04:00	1145	934	0.444	0.662	0.319	866	1290	622
B-G-6	Brusquet	2019-07-05 09:36:00	3194	934	0.747	1.494	0.417	522	1043	292
B-H-7	Brusquet	2019-07-05 11:07:00	1399	933	0.336	1.688	0.114	537	2696	183
B-I-8	Brusquet	2019-07-05 12:37:00	1691	934	0.29	0.522	0.168	382	689	222
M-C-1	Moulin	2019-07-06 07:52:30	2499	929	0.453	0.605	0.34	408	545	307
M-D-3	Moulin	2019-07-06 09:28:30	2054	929	0.267	0.326	0.221	293	357	242
M-A-2	Moulin	2019-07-06 11:01:00	834	927	0.078	0.152	0.042	211	413	115
M-B-4	Moulin	2019-07-06 12:28:30	2371	928	0.569	1.113	0.337	545	1065	323
B-I-8	Brusquet	2019-07-07 06:14:00	2000	928	0.45	0.614	0.335	510	696	380
B-G-6	Brusquet	2019-07-07 09:07:00	3378	931	0.863	2.571	0.358	576	1716	239
B-F-5	Brusquet	2019-07-07 10:46:00	1167	929	0.396	0.571	0.286	765	1101	552
M-B-4	Moulin	2019-07-08 07:09:00	2015	926	0.512	0.764	0.354	570	851	395
M-D-3	Moulin	2019-07-08 09:09:00	1834	928	0.235	0.347	0.164	287	423	200
M-A-2	Moulin	2019-07-08 10:31:30	721	927	0.079	0.223	0.037	247	696	114
M-C-1	Moulin	2019-07-08 11:57:30	2492	929	0.408	0.702	0.245	368	634	222
M-B-4	Moulin	2019-07-10 09:05:00	1650	923	0.472	0.76	0.304	638	1027	411
M-C-1	Moulin	2019-07-10 11:06:30	2275	925	0.385	0.544	0.279	378	533	273
M-B-4	Moulin	2019-07-11 07:53:30	1822	928	0.474	0.687	0.337	581	841	413
M-C-1	Moulin	2019-07-11 09:27:30	2189	928	0.366	0.579	0.238	373	590	243
B-G-6	Brusquet	2019-07-12 13:56:00	2829	929	0.536	1.826	0.216	424	1443	170
B-I-8	Brusquet	2019-07-12 15:27:00	1762	931	0.416	0.962	0.211	530	1227	269
M-B-4	Moulin	2019-07-12 18:17:30	2680	928	0.501	0.782	0.331	428	667	283
B-G-6	Brusquet	2019-09-27 15:05:00	2024	935	0.443	0.732	0.281	481	796	306
B-I-8	Brusquet	2019-09-27 16:37:30	1547	931	0.316	0.461	0.223	454	662	321
B-G-6	Brusquet	2019-09-27 17:35:00	#N/A	933	#N/A	#N/A	#N/A	#N/A	#N/A	#N/A
B-F-5	Brusquet	2019-09-28 10:20:00	810	934	0.14	0.229	0.089	372	610	238
B-G-6	Brusquet	2019-09-28 11:50:00	1929	933	0.592	0.847	0.43	666	952	483
B-I-8	Brusquet	2019-09-28 14:06:00	1219	932	0.25	0.307	0.205	449	550	368
B-H-7	Brusquet	2019-09-28 16:06:30	1125	931	0.171	0.927	0.053	339	1833	104
M-B-4	Moulin	2019-09-29 09:52:30	1533	929	0.44	0.59	0.335	631	848	481
M-A-2	Moulin	2019-09-29 11:12:30	780	928	0.049	0.084	0.026	138	238	72
M-D-3	Moulin	2019-09-29 12:32:00	1755	930	0.149	0.268	0.087	189	339	110
M-C-1	Moulin	2019-09-29 13:59:30	1893	928	0.237	0.481	0.121	279	567	143
M-B-4	Moulin	2019-09-29 15:32:30	#N/A	927	#N/A	#N/A	#N/A	#N/A	#N/A	#N/A
M-B-4	Moulin	2019-09-30 10:03:30	1536	926	0.261	0.372	0.185	377	537	267
M-C-1	Moulin	2019-09-30 12:27:30	1721	925	0.231	0.335	0.161	299	432	208
M-B-4	Moulin	2019-09-30 14:32:30	#N/A	925	#N/A	#N/A	#N/A	#N/A	#N/A	#N/A
B-G-6	Brusquet	2019-10-02 09:01:30	2226	921	0.338	0.908	0.172	331	890	168
M-B-4	Moulin	2019-10-02 11:57:30	1414	918	0.471	0.622	0.364	744	982	575
M-C-1	Moulin	2019-10-02 14:38:00	1803	918	0.294	0.368	0.236	367	459	294

## Sheet: Table S8
Table S8. O2 Rock, and O2 fluxes (Eq. 7).
Chamber	Site	Date and time	O2 Rock (%)	O2 Rock: Range +RMSE (%)	O2 Rock: Range -RMSE (%)	O2 flux (mmol O2 min-1)	O2 flux: Range 95%CI+ (mmol O2 min-1)	O2 flux: Range 95%CI- (mmol O2 min-1)
M-A-2	Moulin	2018-09-27 08:54:30	#N/A	#N/A	#N/A	#N/A	#N/A	#N/A
M-B-4	Moulin	2018-09-27 10:10:00	#N/A	#N/A	#N/A	#N/A	#N/A	#N/A
M-C-1	Moulin	2018-09-27 11:18:00	#N/A	#N/A	#N/A	#N/A	#N/A	#N/A
M-D-3	Moulin	2018-09-27 12:18:30	#N/A	#N/A	#N/A	#N/A	#N/A	#N/A
B-F-5	Brusquet	2018-09-27 14:19:00	#N/A	#N/A	#N/A	#N/A	#N/A	#N/A
B-G-6	Brusquet	2018-09-27 15:21:30	#N/A	#N/A	#N/A	#N/A	#N/A	#N/A
B-H-7	Brusquet	2018-09-27 16:26:00	#N/A	#N/A	#N/A	#N/A	#N/A	#N/A
B-I-8	Brusquet	2018-09-27 17:25:00	#N/A	#N/A	#N/A	#N/A	#N/A	#N/A
M-C-1	Moulin	2019-01-11 11:57:00	#N/A	#N/A	#N/A	#N/A	#N/A	#N/A
M-D-3	Moulin	2019-01-11 13:11:00	#N/A	#N/A	#N/A	#N/A	#N/A	#N/A
M-B-4	Moulin	2019-01-11 14:24:00	#N/A	#N/A	#N/A	#N/A	#N/A	#N/A
M-A-2	Moulin	2019-01-11 15:39:00	#N/A	#N/A	#N/A	#N/A	#N/A	#N/A
B-F-5	Brusquet	2019-01-12 11:05:30	#N/A	#N/A	#N/A	#N/A	#N/A	#N/A
B-G-6	Brusquet	2019-01-12 12:17:00	#N/A	#N/A	#N/A	#N/A	#N/A	#N/A
B-H-7	Brusquet	2019-01-12 13:24:00	#N/A	#N/A	#N/A	#N/A	#N/A	#N/A
B-I-8	Brusquet	2019-01-12 14:33:30	#N/A	#N/A	#N/A	#N/A	#N/A	#N/A
B-F-5	Brusquet	2019-01-12 15:45:30	#N/A	#N/A	#N/A	#N/A	#N/A	#N/A
M-B-4	Moulin	2019-01-13 12:36:30	#N/A	#N/A	#N/A	#N/A	#N/A	#N/A
B-F-5	Brusquet	2019-01-14 10:19:30	#N/A	#N/A	#N/A	#N/A	#N/A	#N/A
B-G-6	Brusquet	2019-01-14 13:07:30	#N/A	#N/A	#N/A	#N/A	#N/A	#N/A
B-F-5	Brusquet	2019-01-14 16:55:00	#N/A	#N/A	#N/A	#N/A	#N/A	#N/A
M-C-1	Moulin	2019-04-11 10:26:00	20.1	20.4	19.7	-0.0034	-0.0013	-0.0058
M-D-3	Moulin	2019-04-11 11:53:30	#N/A	#N/A	#N/A	#N/A	#N/A	#N/A
M-A-2	Moulin	2019-04-11 13:12:00	#N/A	#N/A	#N/A	#N/A	#N/A	#N/A
M-B-4	Moulin	2019-04-11 14:45:30	#N/A	#N/A	#N/A	#N/A	#N/A	#N/A
B-F-5	Brusquet	2019-04-12 09:26:30	20.2	20.6	19.9	#N/A	#N/A	#N/A
B-G-6	Brusquet	2019-04-12 10:57:00	#N/A	#N/A	#N/A	#N/A	#N/A	#N/A
B-H-7	Brusquet	2019-04-12 12:24:00	#N/A	#N/A	#N/A	#N/A	#N/A	#N/A
B-I-8	Brusquet	2019-04-12 13:57:00	#N/A	#N/A	#N/A	#N/A	#N/A	#N/A
M-B-4	Moulin	2019-04-13 11:54:30	20.3	20.7	20	-0.0007	-0.0002	-0.0013
M-B-4	Moulin	2019-04-14 10:24:30	20	20.4	19.7	-0.002	-0.0006	-0.0039
B-G-6	Brusquet	2019-04-14 14:36:00	21.1	21.5	20.8	0.0004	0.001	-0.0005
B-G-6	Brusquet	2019-04-15 10:32:30	20.9	21.3	20.5	-0.0001	0.0006	-0.0011
M-B-4	Moulin	2019-04-15 14:59:00	20.8	21.1	20.4	-0.0006	0.0005	-0.0023
M-C-1	Moulin	2019-05-27 13:16:00	#N/A	#N/A	#N/A	#N/A	#N/A	#N/A
M-B-4	Moulin	2019-05-27 15:25:00	#N/A	#N/A	#N/A	#N/A	#N/A	#N/A
B-G-6	Brusquet	2019-05-29 09:13:30	#N/A	#N/A	#N/A	#N/A	#N/A	#N/A
B-F-5	Brusquet	2019-05-29 10:30:00	#N/A	#N/A	#N/A	#N/A	#N/A	#N/A
B-F-5	Brusquet	2019-07-05 08:04:00	20.2	20.5	19.9	-0.0137	-0.0078	-0.0239
B-G-6	Brusquet	2019-07-05 09:36:00	#N/A	#N/A	#N/A	#N/A	#N/A	#N/A
B-H-7	Brusquet	2019-07-05 11:07:00	#N/A	#N/A	#N/A	#N/A	#N/A	#N/A
B-I-8	Brusquet	2019-07-05 12:37:00	#N/A	#N/A	#N/A	#N/A	#N/A	#N/A
M-C-1	Moulin	2019-07-06 07:52:30	20	20.3	19.8	-0.0088	-0.0051	-0.0126
M-D-3	Moulin	2019-07-06 09:28:30	#N/A	#N/A	#N/A	#N/A	#N/A	#N/A
M-A-2	Moulin	2019-07-06 11:01:00	#N/A	#N/A	#N/A	#N/A	#N/A	#N/A
M-B-4	Moulin	2019-07-06 12:28:30	#N/A	#N/A	#N/A	#N/A	#N/A	#N/A
B-I-8	Brusquet	2019-07-07 06:14:00	19.8	20.2	19.5	-0.0163	-0.0106	-0.0241
B-G-6	Brusquet	2019-07-07 09:07:00	#N/A	#N/A	#N/A	#N/A	#N/A	#N/A
B-F-5	Brusquet	2019-07-07 10:46:00	#N/A	#N/A	#N/A	#N/A	#N/A	#N/A
M-B-4	Moulin	2019-07-08 07:09:00	#N/A	#N/A	#N/A	#N/A	#N/A	#N/A
M-D-3	Moulin	2019-07-08 09:09:00	#N/A	#N/A	#N/A	#N/A	#N/A	#N/A
M-A-2	Moulin	2019-07-08 10:31:30	#N/A	#N/A	#N/A	#N/A	#N/A	#N/A
M-C-1	Moulin	2019-07-08 11:57:30	#N/A	#N/A	#N/A	#N/A	#N/A	#N/A
M-B-4	Moulin	2019-07-10 09:05:00	19.9	20.2	19.6	-0.0125	-0.0084	-0.017
M-C-1	Moulin	2019-07-10 11:06:30	#N/A	#N/A	#N/A	#N/A	#N/A	#N/A
M-B-4	Moulin	2019-07-11 07:53:30	#N/A	#N/A	#N/A	#N/A	#N/A	#N/A
M-C-1	Moulin	2019-07-11 09:27:30	#N/A	#N/A	#N/A	#N/A	#N/A	#N/A
B-G-6	Brusquet	2019-07-12 13:56:00	#N/A	#N/A	#N/A	#N/A	#N/A	#N/A
B-I-8	Brusquet	2019-07-12 15:27:00	#N/A	#N/A	#N/A	#N/A	#N/A	#N/A
M-B-4	Moulin	2019-07-12 18:17:30	19.7	20	19.4	-0.0163	-0.0115	-0.0225
B-G-6	Brusquet	2019-09-27 15:05:00	#N/A	#N/A	#N/A	#N/A	#N/A	#N/A
B-I-8	Brusquet	2019-09-27 16:37:30	#N/A	#N/A	#N/A	#N/A	#N/A	#N/A
B-G-6	Brusquet	2019-09-27 17:35:00	#N/A	#N/A	#N/A	#N/A	#N/A	#N/A
B-F-5	Brusquet	2019-09-28 10:20:00	20.4	20.7	20.1	-0.0108	-0.0044	-0.0199
B-G-6	Brusquet	2019-09-28 11:50:00	#N/A	#N/A	#N/A	#N/A	#N/A	#N/A
B-I-8	Brusquet	2019-09-28 14:06:00	#N/A	#N/A	#N/A	#N/A	#N/A	#N/A
B-H-7	Brusquet	2019-09-28 16:06:30	#N/A	#N/A	#N/A	#N/A	#N/A	#N/A
M-B-4	Moulin	2019-09-29 09:52:30	20.2	20.6	19.9	-0.0111	-0.006	-0.0175
M-A-2	Moulin	2019-09-29 11:12:30	#N/A	#N/A	#N/A	#N/A	#N/A	#N/A
M-D-3	Moulin	2019-09-29 12:32:00	#N/A	#N/A	#N/A	#N/A	#N/A	#N/A
M-C-1	Moulin	2019-09-29 13:59:30	#N/A	#N/A	#N/A	#N/A	#N/A	#N/A
M-B-4	Moulin	2019-09-29 15:32:30	#N/A	#N/A	#N/A	#N/A	#N/A	#N/A
M-B-4	Moulin	2019-09-30 10:03:30	#N/A	#N/A	#N/A	#N/A	#N/A	#N/A
M-C-1	Moulin	2019-09-30 12:27:30	#N/A	#N/A	#N/A	#N/A	#N/A	#N/A
M-B-4	Moulin	2019-09-30 14:32:30	#N/A	#N/A	#N/A	#N/A	#N/A	#N/A
B-G-6	Brusquet	2019-10-02 09:01:30	19.7	20	19.4	-0.0109	-0.0071	-0.0145
M-B-4	Moulin	2019-10-02 11:57:30	19.4	19.7	19.2	-0.0149	-0.0112	-0.019
M-C-1	Moulin	2019-10-02 14:38:00	#N/A	#N/A	#N/A	#N/A	#N/A	#N/A
